# Supplementary material for: Global analysis reveals multiple pathways for unique regulation of mRNA decay in induced pluripotent stem cells
Source: HighWire-hosted journal article supplement (doi:10.1101/gr.134312.111), 2012-04-25
Supplement: Dataset1.xlsx [file Dataset1.xlsx]

## Sheet: Half-lives in HFFs
Dataset 1A: Half-lives of mRNAs in HFF cells (min)
Gene_id	Gene_sym	Transcript_id	Half-Life	P-value
1027	CDKN1B	7954029	101.77	1.28095e-09
1843	DUSP1	8115831	39.2123	1.38981e-09
79094	CHAC1	7982868	125.921	1.42413e-09
643836	ZFP62	8116494	299.628	2.519e-09
57711	ZNF529	8036333	274.985	6.04804e-09
133	ADM	7938390	71.7599	8.33941e-09
57561	ARRDC3	8113073	92.9737	1.24027e-08
10769	PLK2	8112202	99.7577	1.66254e-08
10253	SPRY2	7972217	139.858	1.7697e-08
379	ARL4D	8007493	128.224	2.75435e-08
5507	PPP1R3C	7934997	77.8959	2.84144e-08
55030	FBXO34	7974473	157.966	3.37865e-08
58486	ZBED5	7946635	152.696	3.52777e-08
1848	DUSP6	7965335	55.8399	3.72422e-08
9831	ZNF623	8148658	205.938	3.7292e-08
7764	ZNF217	8067113	125.688	3.90398e-08
3491	CYR61	7902687	89.8455	4.09162e-08
10780	ZNF234	8029392	219.092	4.17418e-08
4092	SMAD7	8023220	228.247	4.2878e-08
112970	KTI12	7916130	123.824	4.97648e-08
388796	LOC388796	8066254	200.098	5.2126e-08
170082	TCEANC	8166096	398.485	5.23858e-08
25897	RNF19A	8152041	196.22	5.41863e-08
406962	MIR186	7916984	593.294	5.59806e-08
57343	ZNF304	8031726	205.597	5.75363e-08
57474	ZNF490	8034408	228.82	7.31755e-08
4899	NRF1	8136140	359.926	7.40737e-08
84775	ZNF607	8036436	274.077	9.38694e-08
199692	ZNF627	8025927	118.56	9.43588e-08
403341	ZBTB34	8157941	221.207	1.05643e-07
1781	DYNC1I2	8165653	69.7517	1.06505e-07
767578	SNORD114-2	7976814	185.009	1.12071e-07
10557	RPP38	7926345	377.126	1.15251e-07
55602	CDKN2AIP	8098500	236.137	1.1706e-07
64651	CSRNP1	8086330	149.808	1.33888e-07
8204	NRIP1	8069553	166.237	1.37996e-07
25976	TIPARP	8083569	111.109	1.38148e-07
3659	IRF1	8114010	173.206	1.46212e-07
29923	C7orf68	8135915	317.479	1.55614e-07
259295	TAS2R20	7961285	522.019	1.6677e-07
390	RND3	8055688	274.867	1.74729e-07
10172	ZNF256	8039706	288.947	1.75265e-07
51339	DACT1	7974689	321.663	1.87824e-07
91151	TIGD7	7998952	904.98	1.95562e-07
166815	TIGD2	8096411	267.999	1.97411e-07
259296	TAS2R50	7961281	631.68	2.14946e-07
7403	KDM6A	8166956	234.161	2.21533e-07
79797	ZNF408	7939699	429.62	2.31232e-07
146050	ZSCAN29	7988082	263.435	2.3375e-07
93474	ZNF670	7925672	211.307	2.41102e-07
8366	HIST1H4B	8124385	81.0499	2.58831e-07
146434	ZNF597	7998978	320.012	2.73005e-07
79441	HAUS3	8098985	389.553	2.76997e-07
100131826	LOC100131826	8095868	182.101	2.85872e-07
84224	NBPF3	7913380	399.632	2.89866e-07
6591	SNAI2	8150698	92.9266	2.98686e-07
4609	MYC	8148317	111.389	3.02255e-07
29946	SERTAD3	8036908	199.259	3.33432e-07
131583	FAM43A	8084891	108.324	3.41799e-07
4792	NFKBIA	7978644	57.3052	3.4663e-07
55659	ZNF416	8039664	187.291	3.46844e-07
79230	ZNF557	8025132	239.026	3.54395e-07
64782	AEN	7985767	160.091	3.65293e-07
899	CCNF	7992594	231.465	3.88164e-07
79744	ZNF419	8031750	236.555	3.98426e-07
54554	WDR5B	8089993	243.581	4.07394e-07
149371	EXOC8	7925043	213.327	4.40701e-07
406996	MIR214	7922326	225.995	4.50978e-07
9836	LCMT2	7988077	168.107	4.61375e-07
8338	HIST2H2AC	7905088	47.1978	4.75954e-07
259290	TAS2R31	7961291	542.045	4.77262e-07
79898	ZNF613	8030871	331.301	4.85571e-07
407026	MIR29C	7923974	367.83	5.07403e-07
7128	TNFAIP3	8122265	244.722	5.08512e-07
6018	RLF	7900395	184.454	5.09087e-07
81577	GFOD2	8002082	380.193	5.14482e-07
9880	ZBTB39	7964300	204.277	5.15378e-07
8493	PPM1D	8008922	131.419	5.27948e-07
4170	MCL1	7919751	112.403	5.28646e-07
7539	ZFP37	8163444	439.905	5.36686e-07
25832	NBPF14	7904569	502.535	5.4168e-07
54455	FBXO42	7912750	220.919	5.53633e-07
221504	ZBTB9	8118721	359.758	5.60099e-07
6910	TBX5	7966668	133.521	5.62428e-07
26800	SNORD49A	8005202	113.744	5.96063e-07
284406	ZFP82	8036309	139.382	6.01291e-07
152518	NFXL1	8100179	277.234	6.05176e-07
140831	ZSWIM3	8063071	438.306	6.10736e-07
4081	MAB21L1	7970949	143.096	6.20202e-07
26149	ZNF658	8161319	512.609	6.27269e-07
80314	EPC1	7932938	160.837	6.29183e-07
5514	PPP1R10	8178358	103.101	6.30951e-07
5514	PPP1R10	8124756	103.101	6.30951e-07
5514	PPP1R10	8179664	103.101	6.30951e-07
9592	IER2	8026163	90.6178	6.32667e-07
7862	BRPF1	8077595	276.664	6.3654e-07
3725	JUN	7916609	86.3325	6.43534e-07
81698	C15orf5	7990636	412.281	6.59547e-07
26149	ZNF658	8161326	620.322	6.70838e-07
8332	HIST1H2AL	8117608	344.223	6.76435e-07
9655	SOCS5	8041820	163.707	6.79002e-07
11221	DUSP10	7924450	178.789	6.82105e-07
144165	PRICKLE1	7962375	155.837	6.86179e-07
10765	KDM5B	7923453	158.568	6.98878e-07
25880	TMEM186	7999317	217.545	7.02303e-07
64763	ZNF574	8029182	187.146	7.31736e-07
403341	ZBTB34	8157947	219.551	7.38101e-07
407000	MIR218-1	8094340	476.435	7.88261e-07
166336	PRICKLE2	8088550	224.062	7.97284e-07
55603	FAM46A	8127778	177.076	8.18708e-07
7633	ZNF79	8158022	276.595	8.52613e-07
7559	ZNF12	8138116	190.528	8.79849e-07
25973	PARS2	7916422	226	9.13749e-07
90589	ZNF625	8034342	158.42	9.24002e-07
7766	ZNF223	8029360	501.155	9.71188e-07
80818	ZNF436	7913582	185.265	9.77864e-07
55628	ZNF407	8021756	319.972	9.80448e-07
136051	ZNF786	8143697	207.132	9.87202e-07
6903	TBCC	8126442	211.204	1.00555e-06
7832	BTG2	7908917	109.86	1.00593e-06
677771	SCARNA4	7920875	1293.62	1.03448e-06
284309	ZNF776	8031815	206.158	1.06148e-06
92935	MARS2	8047243	180.391	1.07978e-06
7988	ZNF212	8137112	232.685	1.10348e-06
27079	RPUSD2	7982753	420.589	1.12943e-06
4214	MAP3K1	8105436	231.019	1.14079e-06
7733	ZNF180	8037474	262.005	1.15008e-06
6446	SGK1	8129677	129.749	1.15378e-06
90627	STARD13	7970924	247.697	1.19385e-06
11214	AKAP13	7985695	207.039	1.20435e-06
27304	MOCS3	8063427	161.182	1.2133e-06
26771	SNORD102	7968232	297.39	1.24e-06
166793	ZBTB49	8093829	311.845	1.26912e-06
7553	ZNF7	8148941	201.78	1.30405e-06
10308	ZNF267	7995258	253.556	1.41265e-06
81848	SPRY4	8114797	148.305	1.41982e-06
29116	MYLIP	8117020	206.227	1.44984e-06
26774	SNORD80	7922404	357.172	1.46628e-06
388567	ZNF749	8031748	598.006	1.47632e-06
81931	ZNF93	8027247	473.77	1.52566e-06
7568	ZNF20	8034334	279.205	1.57733e-06
639	PRDM1	8121257	100.081	1.5811e-06
29950	SERTAD1	8036902	175.209	1.58854e-06
7465	WEE1	7938364	145.162	1.59155e-06
152992	C4orf23	8094070	470.7	1.65082e-06
80301	PLEKHO2	7984217	220.699	1.70125e-06
9816	URB2	7910416	310.142	1.72327e-06
91603	ZNF830	8006477	171.073	1.79619e-06
359948	IRF2BP2	7925161	168.874	1.8178e-06
284391	ZNF844	8025984	261.949	1.83324e-06
9021	SOCS3	8018864	166.222	1.84098e-06
7771	ZFP112	8037453	347.868	1.85276e-06
148479	PHF13	7897322	221.895	1.9049e-06
7699	ZNF140	7960150	406.139	1.96198e-06
441191	RNF216L	8131286	259.645	1.98604e-06
26149	ZNF658	8161346	494.524	2.00006e-06
55167	MSL2	8090893	71.8934	2.04732e-06
317772	HIST2H2AB	7919642	59.3547	2.05177e-06
6615	SNAI1	8063382	287.772	2.06804e-06
3720	JARID2	8116998	257.124	2.09346e-06
1105	CHD1	8113305	300.412	2.09492e-06
7692	ZNF133	8061154	337.678	2.10825e-06
85391	SNORD14E	7952335	525.018	2.13362e-06
60493	FASTKD5	8064581	215.661	2.16649e-06
25888	ZNF473	8030569	460.398	2.18287e-06
7738	ZNF184	8124502	310.152	2.19668e-06
55665	URGCP	8139256	181.529	2.24817e-06
259294	TAS2R19	7961287	549.629	2.40532e-06
7543	ZFX	8166500	218.284	2.41906e-06
3670	ISL1	8105220	372.404	2.4283e-06
3397	ID1	8061564	86.2553	2.44293e-06
51163	DBR1	8090960	213.63	2.46428e-06
163049	ZNF791	8026007	157.437	2.55886e-06
126070	ZNF440	8025958	328.246	2.6159e-06
8335	HIST1H2AB	8124391	69.6162	2.64458e-06
7579	ZSCAN20	7899884	242.012	2.68238e-06
79842	ZBTB3	7948829	224.862	2.69621e-06
55671	SMEK1	7980833	239.799	2.7196e-06
57761	TRIB3	8060344	342.904	2.74966e-06
353274	ZNF445	8086482	294.605	2.75428e-06
677803	SNORA15	8132962	772.806	2.76607e-06
25819	CCRN4L	8097461	191.976	2.77905e-06
7554	ZNF8	8031893	253.368	2.90506e-06
23082	PPRC1	7929990	236.652	2.94069e-06
7693	ZNF134	8031784	185.399	3.05147e-06
7549	ZNF2	8043512	437.179	3.07525e-06
8651	SOCS1	7999423	272.673	3.08175e-06
677803	SNORA15	8133072	888.952	3.11039e-06
677803	SNORA15	8133108	888.952	3.11039e-06
8553	BHLHE40	8077441	187.037	3.11103e-06
148254	ZNF555	8024518	220.287	3.11234e-06
767563	SNORD113-3	7976810	240.707	3.11903e-06
406976	MIR199A1	8034099	429.216	3.14282e-06
79648	MCPH1	8144361	219.654	3.14988e-06
374928	ZNF773	8031759	193.911	3.15951e-06
389856	USP27X	8167601	381.661	3.16577e-06
3142	HLX	7909890	213.613	3.18339e-06
387032	ZKSCAN4	8124553	262.363	3.20562e-06
90233	ZNF551	8031807	301.195	3.24949e-06
92	ACVR2A	8045587	271.565	3.29417e-06
85460	ZNF518B	8099364	218.493	3.30924e-06
84146	ZNF644	7917604	247.715	3.33926e-06
694	BTG1	7965423	177.151	3.34593e-06
7561	ZNF14	8035765	344.74	3.45845e-06
100130876	LOC100130876	8010978	158.381	3.47691e-06
91664	ZNF845	8030978	227.569	3.49011e-06
147929	ZNF565	8036291	610.371	3.54678e-06
57541	ZNF398	8137091	241.903	3.72978e-06
100133299	LOC100133299	8104568	310.302	3.73001e-06
3008	HIST1H1E	8117377	64.0154	3.76892e-06
2355	FOSL2	8041048	191.734	3.80953e-06
220213	OTUD1	7926677	386.565	3.8626e-06
8161	COIL	8016858	164.695	3.86336e-06
55090	MED9	8005260	303.622	3.87791e-06
59348	ZNF350	8038919	283.858	3.92994e-06
27	ABL2	7922610	219.217	3.96446e-06
25929	GEMIN5	8115410	345.828	4.09036e-06
127544	RNF19B	7914603	300.125	4.10891e-06
400720	ZNF772	8039645	396.643	4.10937e-06
85462	FHDC1	8097829	628.626	4.13359e-06
10370	CITED2	8129937	107.939	4.24096e-06
80176	SPSB1	7897449	213.798	4.27549e-06
117143	TADA1	7922008	187.063	4.28415e-06
8360	HIST1H4D	8124413	191.991	4.30403e-06
121227	LRIG3	7964602	272.418	4.30624e-06
3009	HIST1H1B	8124527	73.8972	4.35838e-06
26271	FBXO5	8130374	186.091	4.41895e-06
342909	ZNF284	8029368	227.315	4.50217e-06
79142	PHF23	8012099	236.392	4.53102e-06
84924	ZNF566	8036318	331.72	4.5486e-06
256051	ZNF549	8031762	343.434	4.57331e-06
90321	ZNF766	8030899	297.686	4.65636e-06
8367	HIST1H4E	8117402	131.929	4.6671e-06
55520	ELAC1	8021222	378.171	4.74066e-06
57147	SCYL3	7922250	275.073	4.81475e-06
84919	PPP1R15B	7923659	202.951	4.83365e-06
342357	ZKSCAN2	8000399	434.378	4.9118e-06
79728	PALB2	8000329	199.339	4.93798e-06
55290	BRF2	8150219	193.247	4.94527e-06
55552	ZNF823	8034315	296.757	4.96662e-06
79692	ZNF322A	8124459	320.686	4.97565e-06
79666	PLEKHF2	8147439	218.986	4.98473e-06
84132	USP42	8131387	185.465	5.03803e-06
54995	OXSM	8078300	316.024	5.03953e-06
51111	SUV420H1	7949931	340.046	5.04079e-06
406882	MIRLET7A2	7952313	522.218	5.15669e-06
5997	RGS2	7908409	109.51	5.1622e-06
7728	ZNF175	8030831	210.888	5.20238e-06
345462	ZNF879	8110486	537.023	5.21191e-06
594837	SNORD101	8122142	106.4	5.24866e-06
100302207	MIR1974	8165707	50.9132	5.38467e-06
100302207	MIR1974	8113120	50.9132	5.38467e-06
57680	CHD8	7977693	270.086	5.49763e-06
64783	RBM15	7903878	226.93	5.52296e-06
84159	ARID5B	7927732	156.051	5.5774e-06
58491	ZNF71	8031675	318.06	5.66176e-06
56257	MEPCE	8134821	191.645	5.66369e-06
54541	DDIT4	7928308	71.6786	5.68357e-06
221785	ZNF498	8134644	404.815	5.90603e-06
10664	CTCF	7996593	229.447	6.01988e-06
84124	ZNF394	8141305	282.859	6.04391e-06
79818	ZNF552	8031825	191.997	6.13884e-06
6077	SNORD13P2	8131263	501.172	6.43131e-06
166968	MIER3	8112182	224.171	6.53533e-06
100131541	LOC100131541	7951140	328.223	6.56844e-06
57480	PLEKHG1	8122756	643.653	6.64874e-06
200933	FBXO45	8084947	365.314	6.65834e-06
10435	CDC42EP2	7941236	174.776	6.69658e-06
10978	CLP1	7940046	268.924	6.74312e-06
619498	SNORD74	7922418	175.759	6.74489e-06
56652	C10orf2	7929901	420.85	6.75028e-06
84851	TRIM52	8110666	240.951	6.90819e-06
7772	ZNF229	8037467	387.232	7.06986e-06
7565	ZNF17	8031744	435.445	7.22854e-06
1958	EGR1	8108370	80.4199	7.47491e-06
100128288	LOC100128288	8012464	547.822	7.51675e-06
90576	ZNF799	8034390	312.559	7.71932e-06
79891	ZNF671	8039680	169.574	7.79017e-06
10078	TSSC4	7937813	271.98	7.80413e-06
100287934	LOC100287934	7909990	376.662	7.83136e-06
51244	C3orf19	8078033	283.628	7.93687e-06
51585	PCF11	7942839	232.581	8.03151e-06
79692	ZNF322A	8162669	382.153	8.07011e-06
3475	IFRD1	8135514	117.929	8.09782e-06
222255	ATXN7L1	8142098	340.796	8.22589e-06
23210	JMJD6	8018793	246.002	8.3101e-06
9299	SNORD30	7948900	76.9066	8.45451e-06
23189	KANK1	8154012	221.671	8.52791e-06
80312	TET1	7927876	308.054	8.58811e-06
1326	MAP3K8	7926900	368.441	8.60722e-06
80304	C2orf44	8050689	265.259	8.61098e-06
286343	C9orf150	8154381	260.85	8.64021e-06
10208	USPL1	7968333	263	8.66941e-06
114789	SLC25A25	8158147	247.769	8.70772e-06
9693	RAPGEF2	8098121	290.576	8.74011e-06
57089	ENTPD7	7929750	242.688	8.90548e-06
84872	ZC3H10	7956162	475.294	8.92099e-06
147923	ZNF420	8028219	307.488	9.18825e-06
115560	ZNF501	8079229	408.261	9.31908e-06
283219	KCTD21	7950669	168.438	9.34362e-06
285346	ZNF852	8086494	288.415	9.36536e-06
79072	FASTKD3	8110920	441.017	9.60704e-06
22850	ADNP2	8021914	263.866	9.71327e-06
7746	ZNF193	8117655	417.786	9.75609e-06
8870	IER3	8179704	133.467	9.81634e-06
8870	IER3	8124848	133.467	9.81634e-06
10252	SPRY1	8097282	255.078	9.86003e-06
1263	PLK3	7901054	248.381	9.98623e-06
54627	KIAA1383	7910589	529.84	1.05137e-05
8354	HIST1H3I	8124531	27.1723	1.053e-05
5295	PIK3R1	8105778	296.463	1.05613e-05
254225	RNF169	7942544	170.95	1.05853e-05
140460	ASB7	7986433	246.552	1.06001e-05
7071	KLF10	8152215	151.723	1.06639e-05
8968	HIST1H3F	8124437	149.921	1.0669e-05
10221	TRIB1	8148304	164.653	1.07358e-05
7551	ZNF3	8141380	290.519	1.07761e-05
90780	PYGO2	7920594	315.918	1.08592e-05
55096	FLJ10213	8080980	459.978	1.12396e-05
55051	C14orf102	7980702	377.419	1.12732e-05
23240	KIAA0922	8097867	368.562	1.12757e-05
79637	ARMC7	8009755	272.235	1.13961e-05
26789	SNORD59A	7964248	351.479	1.16159e-05
8187	ZNF239	7933180	431.326	1.1702e-05
79003	MIS12	8004144	322.693	1.17667e-05
4665	NAB2	7956287	269.767	1.17947e-05
7695	ZNF136	8025998	337.146	1.18419e-05
374879	ZNF699	8033746	603.511	1.20172e-05
2844	GPR21	8157727	449.838	1.20602e-05
22869	ZNF510	8162631	320.095	1.22239e-05
8870	IER3	8178435	124.395	1.2564e-05
54880	BCOR	8172088	347.06	1.27192e-05
79899	PRR5L	7939383	288.748	1.27205e-05
342892	ZNF850P	8036351	506.208	1.27236e-05
54934	C12orf41	7962811	213.463	1.27984e-05
9314	KLF4	8163002	239.908	1.2872e-05
116228	FAM36A	7925561	363.433	1.30151e-05
2049	EPHB3	8084524	356.792	1.30191e-05
677826	SNORA45	7938293	351.896	1.30334e-05
84060	C7orf64	8134211	292.78	1.30402e-05
100287934	LOC100287934	7896754	352.924	1.30633e-05
64332	NFKBIZ	8081386	163.595	1.30847e-05
7691	ZNF132	8039771	341.686	1.31175e-05
171023	ASXL1	8061725	267.838	1.31361e-05
125919	ZNF543	8031720	283.525	1.3151e-05
163050	ZNF564	8034401	211.741	1.32649e-05
9441	MED26	8035187	255.666	1.3429e-05
55478	PRO2012	7924817	295.661	1.34718e-05
283337	ZNF740	7955721	299.427	1.36562e-05
767582	SNORD114-6	7976818	394.207	1.3704e-05
5142	PDE4B	7902104	332.17	1.3714e-05
4690	NCK1	8082911	256.785	1.37387e-05
51278	IER5	7907904	160.204	1.39055e-05
57691	KIAA1586	8120378	163.529	1.3935e-05
23598	PATZ1	8075493	264.678	1.40006e-05
10127	ZNF263	7992870	322.844	1.44838e-05
2353	FOS	7975779	201	1.45415e-05
64320	RNF25	8058985	229.624	1.45531e-05
25805	BAMBI	7926875	416.218	1.473e-05
10782	ZNF274	8031871	289.467	1.47327e-05
165829	GPR156	8089820	753.058	1.47464e-05
1876	E2F6	8050336	233.167	1.48058e-05
50628	GEMIN4	8010946	298.185	1.49195e-05
387751	GVIN1	7946275	1276.92	1.49333e-05
23268	DNMBP	7935660	137.309	1.51387e-05
55094	GPATCH1	8027521	228.212	1.5215e-05
126375	ZNF792	8036045	450.189	1.52653e-05
6926	TBX3	7966690	144.001	1.54048e-05
8361	HIST1H4F	8117422	145.921	1.55153e-05
390980	ZNF805	8031712	246.68	1.56713e-05
3726	JUNB	8026047	168.414	1.63205e-05
91833	WDR20	7976957	445.232	1.64436e-05
57616	TSHZ3	8035896	253.177	1.64524e-05
10210	TOPORS	8160581	202.251	1.67528e-05
692226	SNORD96B	8174507	736.433	1.67606e-05
9310	ZNF235	8037444	520.445	1.68168e-05
2669	GEM	8151816	268.74	1.70142e-05
155054	ZNF425	8143702	296.364	1.70182e-05
267002	PGBD2	7911301	594.965	1.72325e-05
63893	UBE2O	8018708	267.613	1.72542e-05
619568	SNORA4	8084708	129.776	1.73715e-05
63906	GPATCH3	7913990	376.286	1.73724e-05
163087	ZNF383	8028227	239.424	1.74289e-05
10023	FRAT1	7929616	501.071	1.7519e-05
163227	ZNF100	8035808	301.426	1.75203e-05
9298	SNORD31	7948898	285.943	1.7536e-05
23499	MACF1	7900336	549.093	1.75649e-05
407019	MIR27B	8156571	150.918	1.75669e-05
6913	TBX15	7919028	350.888	1.76853e-05
692090	SNORD59B	7964246	109.253	1.79993e-05
149420	PDIK1L	7899087	429.372	1.80044e-05
5987	TRIM27	8179575	187.545	1.80378e-05
5987	TRIM27	8124610	187.545	1.80378e-05
9825	SPATA2	8066953	313.009	1.82162e-05
23660	ZKSCAN5	8134621	284.872	1.82291e-05
50838	TAS2R13	7961275	567.402	1.83738e-05
3007	HIST1H1D	8124430	84.6125	1.84421e-05
7465	WEE1	7938366	92.331	1.84963e-05
11011	TLK2	8009014	228.083	1.93842e-05
23394	ADNP	8067011	188.949	1.94204e-05
55791	C1orf103	7918467	263.005	1.96113e-05
406935	MIR143	8109157	490.107	1.96908e-05
57617	VPS18	7982845	232.244	1.99144e-05
8363	HIST1H4J	8117598	134.999	1.99804e-05
257364	SNX33	7985016	271.391	2.00076e-05
30832	ZNF354C	8110491	302.915	2.00601e-05
150368	FAM109B	8073573	311.877	2.03056e-05
7727	ZNF174	7992897	303.843	2.04095e-05
55422	ZNF331	8030999	388.12	2.04377e-05
54838	C10orf26	7930162	243.404	2.07021e-05
8603	FAM193A	8093601	294.786	2.09135e-05
9440	MED17	7943176	199.246	2.11067e-05
28951	TRIB2	8040365	243.076	2.18361e-05
170958	ZNF525	8030980	189.452	2.19452e-05
56957	OTUD7B	7919699	320.075	2.21861e-05
57592	ZNF687	7905382	219.294	2.24498e-05
116115	ZNF526	8029188	169.379	2.26125e-05
400818	NBPF9	7904486	454.91	2.27881e-05
126295	ZNF57	8024532	328.953	2.28399e-05
56898	BDH2	8102065	77.5904	2.33409e-05
2033	EP300	8073345	236.498	2.33997e-05
868	CBLB	8089261	254.222	2.35812e-05
646	BNC1	7991080	448.519	2.38129e-05
246175	CNOT6L	8101228	270.297	2.38245e-05
54665	RSBN1	7918681	362.689	2.38445e-05
92806	CENPBD1	8003553	406.662	2.38808e-05
8356	HIST1H3J	8124537	102.122	2.42232e-05
7189	TRAF6	7947540	244.389	2.43195e-05
8344	HIST1H2BE	8117389	241.715	2.43196e-05
148304	C1orf74	7924055	376.051	2.45033e-05
9681	DEPDC5	8072529	336.185	2.45984e-05
729603	LOC729603	8123230	501.046	2.46669e-05
440689	HIST2H2BF	7919606	235.885	2.4774e-05
7022	TFAP2C	8063536	157.796	2.48147e-05
5209	PFKFB3	7926037	224.343	2.48792e-05
654502	IQCJ	8083673	704.693	2.50837e-05
692195	SNORD75	7922416	207.474	2.51914e-05
116039	OSR2	8147573	128.691	2.52907e-05
6627	SNRPA1	7991598	167.336	2.53902e-05
168374	ZNF92	8133089	639.96	2.54475e-05
3087	HHEX	7929282	177.434	2.55078e-05
54454	ATAD2B	8050658	400.325	2.58334e-05
79754	ASB13	7931863	328.405	2.59041e-05
284307	ZIK1	8031768	329.318	2.60353e-05
414899	BLID	7952309	281.703	2.61058e-05
10825	NEU3	7942562	365.209	2.6127e-05
254394	MCM9	8129214	396.548	2.64341e-05
285172	FAM126B	8058182	346.047	2.66472e-05
100128868	LOC100128868	8135585	562.834	2.66476e-05
140901	STK35	8060427	298.529	2.66808e-05
166379	BBS12	8097252	292.355	2.68107e-05
85235	HIST1H2AH	8117543	401.778	2.6875e-05
26797	SNORD52	8118322	222.962	2.69235e-05
2824	GPM6B	8171359	772.77	2.69907e-05
79571	GCC1	8142740	344.574	2.71964e-05
6655	SOS2	7978932	318.661	2.72356e-05
79818	ZNF552	8039687	679.064	2.72763e-05
26512	INTS6	7971692	407.768	2.74205e-05
403341	ZBTB34	8157945	196.564	2.75691e-05
7564	ZNF16	8153930	326.71	2.81456e-05
3337	DNAJB1	8034837	232.704	2.84088e-05
4211	MEIS1	8042356	226.05	2.846e-05
51447	IP6K2	8087201	203.994	2.85541e-05
126917	IFFO2	7912994	318.759	2.87964e-05
677802	SNORA14B	7925182	580.417	2.90217e-05
84285	EIF1AD	7949545	352.631	2.91574e-05
54704	PDP1	8147344	265.796	2.9313e-05
51152	LOC51152	8071049	888.824	2.93311e-05
619555	MIR487A	7976840	525.345	2.98371e-05
90381	C15orf42	7985873	311.896	3.00077e-05
55180	LINS1	7991566	414.354	3.00706e-05
114907	FBXO32	8152703	254.063	3.03015e-05
7594	ZNF43	8035813	343.917	3.03711e-05
494326	MIR377	7976852	554.985	3.04393e-05
10181	RBM5	8079869	232.74	3.06644e-05
23099	ZBTB43	8157933	258.721	3.06941e-05
3181	HNRNPA2B1	8138670	119.443	3.09764e-05
51421	AMOTL2	8090852	185.843	3.10943e-05
8355	HIST1H3G	8124440	477.673	3.12242e-05
51058	ZNF691	7900624	316.932	3.15163e-05
79780	CCDC82	7951157	298.616	3.17864e-05
9301	SNORD27	7948906	160.026	3.18697e-05
147694	ZNF548	8031737	228.662	3.19913e-05
80006	C5orf44	8105661	1133.14	3.20035e-05
140775	SMCR8	8005441	295.654	3.20064e-05
100132406	NBPF10	7904562	440.861	3.30024e-05
26807	SNORD43	8076223	144.197	3.30643e-05
93624	TADA2B	8093993	255.435	3.3073e-05
9297	SNORD29	7948902	169.835	3.34386e-05
57693	ZNF317	8025458	340.644	3.36706e-05
55904	MLL5	8135277	228.953	3.36921e-05
171392	ZNF675	8035847	445.613	3.38571e-05
55137	FIGN	8056323	330.563	3.38738e-05
63920	C5orf54	8115600	538.837	3.38881e-05
1983	EIF5	7977058	97.5856	3.39703e-05
92283	ZNF461	8036341	258.5	3.4028e-05
55279	ZNF654	8081069	318.561	3.40574e-05
54512	EXOSC4	8148710	254.952	3.41587e-05
56929	FEM1C	8113616	303.412	3.45704e-05
6495	SIX1	7979505	198.053	3.46656e-05
406977	MIR199A2	7922328	341.376	3.46674e-05
692088	SNORD50B	8127989	168.644	3.47362e-05
7694	ZNF135	8031857	475.904	3.48041e-05
26145	IRF2BP1	8037723	308.834	3.48628e-05
10116	FEM1B	7984470	244.539	3.49242e-05
7538	ZFP36	8028652	189.166	3.53168e-05
26806	SNORD44	7922410	56.6361	3.53786e-05
23645	PPP1R15A	8030128	204.268	3.54981e-05
9745	ZNF536	8027431	551.135	3.56496e-05
79960	PHF17	8097417	355.498	3.57182e-05
4355	MPP2	8015868	1150.69	3.58227e-05
9889	ZBED4	8073943	335.191	3.59244e-05
8944	SNORD73A	8097792	216.167	3.66839e-05
407036	MIR32	8163107	522.209	3.71374e-05
692198	SNORD78	7922408	56.8679	3.73698e-05
158160	HSD17B7P2	7927082	247.583	3.7393e-05
7569	ZNF182	8172369	434.943	3.74827e-05
283254	HARBI1	7947676	426.786	3.75947e-05
5991	RFX3	8159876	645.816	3.76207e-05
406888	MIRLET7F1	8156521	291.276	3.76741e-05
8350	HIST1H3A	8117330	207.951	3.78081e-05
22822	PHLDA1	7965040	169.779	3.79778e-05
3018	HIST1H2BB	8124394	679.186	3.81571e-05
10838	ZNF275	8170635	311.661	3.84554e-05
9860	LRIG2	7904086	238.089	3.90457e-05
114036	C21orf82	8068363	1032.55	3.93377e-05
80775	TMEM177	8044844	355.255	3.93734e-05
1649	DDIT3	7964460	70.9104	3.9422e-05
22807	IKZF2	8058670	442.976	3.97678e-05
6638	SNRPN	7981945	911.488	3.98915e-05
51307	FAM53C	8108321	258.69	4.00722e-05
55922	NKRF	8174684	377.278	4.0383e-05
79893	GGNBP2	8006638	206.884	4.10704e-05
54407	SLC38A2	7962537	351.055	4.14674e-05
333932	HIST2H3A	7919614	97.0976	4.15475e-05
333932	HIST2H3A	7905085	97.0976	4.15475e-05
8351	HIST1H3D	8124416	101.528	4.1814e-05
81566	CSRNP2	7963235	280.177	4.18351e-05
8364	HIST1H4C	8117368	156.82	4.23017e-05
7638	ZNF221	8029331	531.949	4.24567e-05
134359	POC5	8112709	423.998	4.24955e-05
114826	SMYD4	8011200	440.724	4.27388e-05
81789	TIGD6	8115068	462.327	4.28448e-05
79156	PLEKHF1	8027398	370.528	4.29184e-05
284273	ZADH2	8023871	280.798	4.29406e-05
9778	KIAA0232	8093961	176.588	4.32169e-05
55596	ZCCHC8	7967287	370.182	4.32945e-05
53349	ZFYVE1	7979984	284.699	4.33046e-05
196441	ZFC3H1	7964937	301.407	4.3359e-05
284371	ZNF841	8038949	284.525	4.34589e-05
407011	MIR23B	8156569	360.669	4.4748e-05
81610	FAM83D	8062571	209.357	4.48607e-05
3096	HIVEP1	8116910	264.186	4.49571e-05
64925	CCDC71	8087372	267.992	4.52556e-05
57532	NUFIP2	8013908	196.209	4.53559e-05
84085	FBXO30	8130032	314.961	4.54208e-05
7743	ZNF189	8156935	260.679	4.56149e-05
51312	SLC25A37	8145291	347.4	4.56527e-05
25799	ZNF324	8031956	223.686	4.58166e-05
80095	ZNF606	8039719	339.624	4.58925e-05
79973	ZNF442	8034379	467.889	4.59025e-05
552889	ATXN7L3B	7957242	276.79	4.60051e-05
92342	C1orf156	7922243	383.823	4.65168e-05
3024	HIST1H1A	8124380	192.888	4.65553e-05
26230	TIAM2	8122933	437.601	4.67416e-05
57209	ZNF248	7933092	468.814	4.68508e-05
22943	DKK1	7927631	211.929	4.68523e-05
55432	YOD1	7923967	262.231	4.75508e-05
80298	MTERFD3	7966046	381.661	4.76397e-05
8445	DYRK2	7956930	194.233	4.7822e-05
347169	OR1B1	8163962	733.743	4.78465e-05
157285	SGK223	8149250	191.083	4.85713e-05
5509	PPP1R3D	8067351	357.09	4.86379e-05
90639	COX19	8137693	501.271	4.8641e-05
6909	TBX2	8008969	282.485	4.95206e-05
146923	RUNDC1	8007435	281.379	4.96095e-05
157313	CDCA2	8145418	332.292	4.97463e-05
162972	ZNF550	8039655	318.185	4.99461e-05
162962	ZNF836	8038962	246.024	5.0039e-05
8362	HIST1H4K	8124521	92.9177	5.01171e-05
55794	DDX28	8002211	379.717	5.02806e-05
653604	HIST2H3D	7919612	112.129	5.09007e-05
64852	TUT1	7948685	331.292	5.09164e-05
90317	ZNF616	8038954	402.12	5.16301e-05
1106	CHD2	7986250	307.814	5.16436e-05
57786	RBAK	8131292	448.728	5.16461e-05
406956	MIR181B2	8157802	1013.97	5.19959e-05
9753	ZSCAN12	8124574	436.512	5.28322e-05
57162	PELI1	8052654	357.638	5.29441e-05
493861	EID3	7958200	251.619	5.30244e-05
80149	ZC3H12A	7900146	280.087	5.31934e-05
7584	ZNF35	8079217	339.114	5.36611e-05
1847	DUSP5	7930413	169.963	5.38209e-05
137209	ZNF572	8148276	661.182	5.39715e-05
157773	C8orf48	8144721	569.659	5.41373e-05
100132406	NBPF10	7904506	434.899	5.42192e-05
84976	DISP1	7909954	414.551	5.44074e-05
196528	ARID2	7955019	357.085	5.44431e-05
388	RHOB	8040473	167.801	5.44776e-05
80124	VCPIP1	8151118	288.692	5.45612e-05
90362	FAM110B	8146533	584.05	5.47352e-05
8871	SYNJ2	8123006	273.704	5.47806e-05
8503	PIK3R3	7915787	236.064	5.4837e-05
54663	WDR74	7948881	193.08	5.5344e-05
1846	DUSP4	8150076	505.304	5.54128e-05
8609	KLF7	8058477	153.392	5.56199e-05
9304	SNORD22	7948896	491.194	5.57323e-05
23378	RRP8	7946211	296.098	5.62964e-05
3399	ID3	7913655	112.586	5.6432e-05
83667	SESN2	7899436	227.271	5.6887e-05
57591	MKL1	8076241	226.38	5.71977e-05
9242	MSC	8151334	369.809	5.7239e-05
57466	SFRS15	8069910	222.17	5.72749e-05
30011	SH3KBP1	8165674	291.22	5.75472e-05
64768	IPPK	8162421	340.07	5.76129e-05
124961	ZFP3	8004081	354.081	5.78555e-05
60673	C12orf44	7955606	248.232	5.83311e-05
80745	THUMPD2	8051746	445.869	5.83408e-05
6046	BRD2	8179504	173.619	5.8352e-05
389792	IER5L	8164554	197.644	5.83733e-05
134266	GRPEL2	8109141	363.775	5.87658e-05
84914	ZNF587	8031827	274.373	5.87738e-05
7316	UBC	7967563	328.741	5.89401e-05
85028	SNHG12	7914202	146.162	5.92385e-05
7227	TRPS1	8152453	278.302	5.95868e-05
23036	ZNF292	8120992	266.631	5.97531e-05
6547	SLC8A3	7979888	980.754	5.99433e-05
90441	ZNF622	8111129	203.211	5.99491e-05
159195	USP54	7934411	367.495	5.99638e-05
3178	HNRNPA1	7955890	262.139	6.03872e-05
90594	ZNF439	8025964	362.831	6.04061e-05
8997	KALRN	8082165	881.617	6.04654e-05
162989	DEDD2	8037144	306.531	6.04959e-05
10865	ARID5A	8043621	386.716	6.09804e-05
54910	SEMA4C	8054004	303.384	6.09911e-05
9618	TRAF4	8005978	256.077	6.10918e-05
151903	CCDC12	8086698	248.459	6.11071e-05
8359	HIST1H4A	8117334	319.345	6.11587e-05
22954	TRIM32	8157516	171.303	6.13282e-05
56242	ZNF253	8027241	512.459	6.16123e-05
55039	TRMT12	8148263	312.871	6.20852e-05
26765	SNORD12C	8063345	161.613	6.23496e-05
6046	BRD2	8118580	168.926	6.23746e-05
220929	ZNF438	7932867	612.928	6.25077e-05
158358	KIAA2026	8160011	298.866	6.27015e-05
8330	HIST1H2AK	8124524	201.807	6.36053e-05
1998	ELF2	8102817	336.381	6.3872e-05
11044	PAPD7	8104378	287.161	6.40108e-05
51455	REV1	8054227	343.438	6.40154e-05
64283	RGNEF	8106210	440.109	6.40755e-05
90649	ZNF486	8027260	305.636	6.44372e-05
26122	EPC2	8045619	320.425	6.53386e-05
126069	ZNF491	8025951	566.549	6.53515e-05
90355	C5orf30	8107194	179.348	6.59602e-05
10293	TRAIP	8087513	560.397	6.64629e-05
8848	TSC22D1	7971350	243.54	6.77751e-05
3097	HIVEP2	8129953	266.804	6.80716e-05
10140	TOB1	8016739	238.079	6.83194e-05
3280	HES1	8084880	260.636	6.83431e-05
90592	ZNF700	8025973	396.992	6.83492e-05
7994	MYST3	8150491	281.738	6.89796e-05
157807	CLVS1	8146618	902.918	6.92205e-05
80185	C8orf41	8150175	278.493	6.93661e-05
7627	ZNF75A	7992887	470.789	7.06361e-05
23528	ZNF281	7923183	227.084	7.11984e-05
26024	PTCD1	8141283	352.876	7.19872e-05
57396	CLK4	8116245	394.903	7.23107e-05
8343	HIST1H2BF	8117395	127.265	7.24517e-05
8552	INE1	8167099	283.887	7.38179e-05
338428	SNORD109A	7982098	528.694	7.41662e-05
338428	SNORD109A	7981947	528.694	7.41662e-05
65080	MRPL44	8048752	303.534	7.51392e-05
147040	KCTD11	8004360	298.735	7.52269e-05
25841	ABTB2	7947462	465.242	7.53371e-05
79803	HPS6	7929988	344.435	7.56932e-05
11218	DDX20	7904000	224.635	7.71537e-05
4799	NFX1	8154793	300.625	7.78998e-05
26268	FBXO9	8120271	480.342	7.83489e-05
8897	MTMR3	8072279	300.918	7.87981e-05
4794	NFKBIE	8126666	401.242	7.91153e-05
79940	C6orf155	8127502	345.305	8.00372e-05
9844	ELMO1	8139057	887.816	8.01593e-05
8368	HIST1H4L	8124534	102.42	8.0241e-05
55178	RNMTL1	8003621	315.738	8.06744e-05
151963	C3orf59	8092765	249.514	8.09866e-05
3202	HOXA5	8138735	451.867	8.1104e-05
211	ALAS1	8080184	236.258	8.17221e-05
284443	ZNF493	8027304	581.022	8.2539e-05
58500	ZNF250	8153920	372.992	8.36416e-05
2117	ETV3	7921228	254.589	8.42116e-05
90589	ZNF625	8034344	304.381	8.4336e-05
1039	CDR2	8000236	286.494	8.45381e-05
3508	IGHMBP2	7942073	522.07	8.4836e-05
7675	ZNF121	8033789	361.491	8.5139e-05
100131131	LOC100131131	8043993	861.621	8.52268e-05
3162	HMOX1	8072678	257.797	8.54298e-05
57678	GPAM	7896750	440.006	8.55718e-05
741	ZNHIT2	7949373	424.64	8.61542e-05
648987	LOC648987	8111922	579.373	8.64782e-05
4783	NFIL3	8162276	189.033	8.69825e-05
58526	MID1IP1	8166797	363.581	8.7628e-05
90075	ZNF30	8027692	607.716	8.77422e-05
64421	DCLRE1C	7932186	649.088	8.82002e-05
285267	ZNF619	8078991	682.691	8.86345e-05
55196	C12orf35	7954711	321.439	8.87467e-05
55703	POLR3B	7958275	316.267	8.92443e-05
26796	SNORD53	8041168	329.035	8.93437e-05
121642	ALKBH2	7966183	309.869	8.94744e-05
10349	ABCA10	8018006	1220.94	8.94868e-05
9798	KIAA0174	7997168	300.413	9.00334e-05
5926	ARID4A	7974621	402.965	9.00667e-05
57602	USP36	8018937	361.022	9.01912e-05
27099	C7orf54	8135902	758.335	9.03049e-05
9841	ZBTB24	8128767	289.129	9.11336e-05
26814	SNORD36B	8159006	341.676	9.15269e-05
80262	C16orf70	7996403	241.897	9.15752e-05
256148	OR4S1	7939871	1459.34	9.1608e-05
692157	SNORA16B	7909601	1618.09	9.33587e-05
1745	DLX1	8046373	403.241	9.37846e-05
1647	GADD45A	7902227	179.759	9.42441e-05
54821	ERCC6L	8173506	1107.58	9.44385e-05
904	CCNT1	7962831	292.269	9.51872e-05
163081	ZNF567	8028200	615.837	9.52378e-05
8337	HIST2H2AA3	7919619	116.703	9.69677e-05
8337	HIST2H2AA3	7905079	116.703	9.69677e-05
80110	ZNF614	8038933	313.612	9.69892e-05
337875	HIST2H2BA	7904465	121.937	9.71816e-05
83607	AMMECR1L	8055096	276.581	9.7323e-05
8346	HIST1H2BI	8117429	518.158	9.76271e-05
100124537	SNORA70B	8052524	739.31	9.81839e-05
200734	SPRED2	8052689	341.479	9.84821e-05
7544	ZFY	8176384	287.552	9.85298e-05
494331	MIR382	7976842	320.992	9.87993e-05
80271	ITPKC	8028908	382.641	9.89945e-05
8690	JRKL	7943314	453.661	0.000100638
7770	ZNF227	8029413	343.289	0.000100663
3207	HOXA11	8138765	232.435	0.000100728
54936	ADPRHL2	7900087	394.442	0.000100996
389677	RBM12B	8151788	329.165	0.000101119
23774	BRD1	8076836	334.477	0.000101706
51385	ZNF589	8079598	682.474	0.000102178
10773	ZBTB6	8163999	234.579	0.000102325
114130	MGC16384	7967636	376.736	0.000102585
94137	RP1L1	8149283	732.757	0.000103182
100132099	LOC100132099	7969794	644.474	0.000103186
80034	CSRNP3	8046048	485.772	0.000103771
1195	CLK1	8058127	296.111	0.000104044
80139	ZNF703	8145829	265.727	0.000104743
284370	ZNF615	8038925	679.803	0.000105322
162239	ZFP1	7997257	283.082	0.00010563
222194	RSBN1L	8133809	340.341	0.000105651
9712	USP6NL	7932023	366.531	0.000105749
100337591	SNORA70F	8056359	726.555	0.000105815
8329	HIST1H2AI	8117583	191.467	0.000106363
57325	CSRP2BP	8061138	362.524	0.000106828
27145	FILIP1	8127646	850.261	0.00010887
9587	MAD2L1BP	8119874	204.729	0.000109227
9306	SOCS6	8021707	127.818	0.000109289
79862	ZNF669	7925677	251.197	0.000109519
122525	C14orf28	7974117	421.121	0.000109536
23220	DTX4	7940160	495.523	0.000109633
8358	HIST1H3B	8124388	86.7008	0.000109877
440675	NBPF12	7904500	359.981	0.000110507
8028	MLLT10	7926565	359.393	0.000110845
353088	ZNF429	8027312	368.638	0.000111389
162967	ZNF320	8039006	470.129	0.000111624
55028	C17orf80	8009552	378.558	0.000112042
84913	ATOH8	8043244	427.724	0.000112294
407006	MIR221	8172266	119.451	0.00011247
55113	XKR8	7899417	371.185	0.000113119
8444	DYRK3	7909225	389.196	0.0001134
22890	ZBTB1	7975068	256.339	0.00011351
627	BDNF	7947230	237.071	0.000114676
3566	IL4R	7994280	339.281	0.000114857
81788	NUAK2	7923753	217.319	0.000115137
5187	PER1	8012349	423.025	0.000115713
54468	MIOS	8131479	287.865	0.000115723
84127	RUNDC2A	7993274	271.501	0.000117421
84449	ZNF333	8026365	679.897	0.000117682
7572	ZNF24	8022882	395.531	0.000118206
100129842	ZNF737	8035793	232.95	0.000118224
692197	SNORD77	7922412	780.603	0.000118283
388561	ZNF761	8030993	325.105	0.000118293
22835	ZFP30	8036420	254.054	0.000118315
7711	ZNF155	8029340	418.497	0.000118439
4616	GADD45B	8024485	220.785	0.000118732
8835	SOCS2	7957551	204.866	0.000119044
6431	SFRS6	8062695	268.577	0.000119193
55159	RFWD3	8002762	307.813	0.000119233
7745	ZNF192	8117646	285.261	0.000119477
153684	LOC153684	8105132	729.238	0.000119581
91574	C12orf65	7959563	201.458	0.000120095
81932	HDHD3	8163505	403.489	0.000120158
7006	TEC	8100231	603.901	0.000120897
4097	MAFG	8019796	258.728	0.000121281
23318	ZCCHC11	7916185	365.77	0.000122972
6433	SFRS8	7959927	253.148	0.000123128
388701	C1orf189	7920487	391.138	0.000123348
9857	CEP350	7907790	338.233	0.000123397
285989	ZNF789	8134613	614.049	0.000123904
26074	C20orf26	8061272	1499.71	0.00012471
1479	CSTF3	7947396	369.63	0.000125191
84803	AGPAT9	8096116	590.62	0.000125633
406991	MIR21	8008885	37.3544	0.000125777
2074	ERCC6	7933509	308.091	0.000126559
22911	WDR47	7918275	265.441	0.000127136
9534	ZNF254	8027368	290.279	0.000127393
55272	IMP3	7990540	205.941	0.000127558
100128751	LOC100128751	7907090	988.155	0.000129003
388569	ZNF324B	8031949	401.897	0.00012907
23228	PLCL2	8078187	595.685	0.000129657
83874	TBC1D10A	8075332	267.135	0.000129838
54014	BRWD1	8070341	505.245	0.000130304
9329	GTF3C4	8158918	318.078	0.000130517
57678	GPAM	8165663	339.752	0.000131155
339327	ZNF546	8028770	623.899	0.000131414
22823	MTF2	7903032	314.736	0.000131429
8772	FADD	7942168	295.643	0.000131527
692312	PPAN-P2RY11	8025563	452.721	0.000131902
6877	TAF5	7930213	358.4	0.000132115
8329	HIST1H2AI	8117580	109.92	0.000132601
112840	WDR89	7979565	473.738	0.000133005
7644	ZNF91	8035842	389.838	0.000133611
51276	ZNF571	8036406	577.378	0.000134246
677849	SNORD1B	8010080	1177.01	0.000134613
8737	RIPK1	8116622	339.367	0.00013519
55629	PNRC2	7898910	175.027	0.000137434
55629	PNRC2	8039933	175.027	0.000137434
284058	KIAA1267	8016266	317.519	0.000137563
2956	MSH6	8041888	284.398	0.000138215
26234	FBXL5	8099449	250.471	0.000138621
83480	PUS3	7952522	343.694	0.000139153
445341	TNAP	7971159	703.203	0.000139269
55038	CDCA4	7981525	307.793	0.000139475
8313	AXIN2	8017718	622.271	0.00014075
57507	ZNF608	8113761	404.991	0.000140822
415116	PIM3	8073960	311.283	0.000141012
401105	FLJ42393	8084739	375.359	0.000141207
51601	LIPT1	8043840	763.732	0.000141999
51701	NLK	8005814	347.282	0.000142591
80820	EEPD1	8132305	567.466	0.000142773
84247	LDOC1L	8076673	240.959	0.000142857
10758	TRAF3IP2	8128939	224.212	0.000143208
83903	GSG2	8003844	451.231	0.000143279
7737	RNF113A	8174731	525.288	0.000144021
63934	ZNF667	8039593	445.004	0.000144836
221786	FAM200A	8141311	432.71	0.000145034
619571	SNORD96A	8116530	342.221	0.000145207
65056	GPBP1	8105463	337.977	0.000146644
9278	ZBTB22	8178988	504.581	0.000147027
57645	POGK	7907024	334.198	0.000147349
2294	FOXF1	7997726	262.081	0.000147473
9925	ZBTB5	8161224	225.309	0.00014754
9156	EXO1	7910997	434.704	0.000148548
4088	SMAD3	7984364	193.333	0.000149488
22882	ZHX2	8148149	280.803	0.000151841
100033414	SNORD116-2	7981951	707.734	0.000152448
55692	LUC7L	7998174	314.42	0.000152674
84640	USP38	8097570	280.689	0.00015328
7567	ZNF19	8002547	578.896	0.000156034
25914	RTTN	8023766	417.459	0.000156386
5373	PMM2	7993148	258.306	0.00015691
27245	AHDC1	7914103	270.281	0.000157295
100124535	SNORA36C	8052826	436.071	0.000157849
23212	RRS1	8146685	345.232	0.000158176
57678	GPAM	8113356	336.736	0.000158463
27153	ZNF777	8143714	284.884	0.000158824
6478	SIAH2	8091485	305.484	0.000159755
125228	C18orf19	8022404	375.143	0.000160031
10766	TOB2	8076331	233.054	0.000160472
7773	ZNF230	8029347	514.691	0.000160971
10957	PNRC1	8121076	250.869	0.000161281
286151	FBXO43	8152031	1158.28	0.000161541
57569	ARHGAP20	7951565	375.304	0.000161745
5546	PRCC	7906235	263.345	0.000162106
7589	ZSCAN21	8134689	397.622	0.00016222
5914	RARA	8007084	403.319	0.000162231
5326	PLAGL2	8065607	214.075	0.000163703
92691	TMEM169	8048141	414.859	0.000163793
55355	HJURP	8059838	225.8	0.000165698
4524	MTHFR	7912496	418.103	0.000166249
407035	MIR31	8160439	693.388	0.000167842
9302	SNORD26	7948908	41.2047	0.000167885
115273	RAB42	7899499	709.496	0.000168761
5077	PAX3	8059301	568.943	0.000168881
645339	LOC645339	7925058	1377.99	0.000168947
8864	PER2	8059996	471.318	0.000169368
728936	NBPF16	7904874	292.066	0.000169697
90326	THAP3	7897329	609.072	0.000169923
3667	IRS1	8059470	330.565	0.000170058
253143	C22orf30	8075542	296.766	0.000170803
7465	WEE1	7938348	245.719	0.000170923
115811	IQCD	7966596	954.607	0.00017105
79660	PPP1R3B	8149264	478.136	0.000171055
1877	E4F1	7992568	418.794	0.000171089
11102	RPP14	8080773	350.004	0.000171141
56956	LHX9	7908529	347.774	0.000172154
571	BACH1	8068105	268.163	0.000172161
84911	ZNF382	8028194	415.542	0.000172215
63899	NSUN3	8081128	273.231	0.000172704
90338	ZNF160	8039034	280.294	0.000173189
26773	SNORD4A	8005953	403.847	0.000173272
222255	ATXN7L1	8142087	498.644	0.000173393
9654	TTLL4	8048411	297.555	0.000173655
9699	RIMS2	8147796	1065.04	0.000174814
90826	PRMT10	8103079	428.07	0.000174972
79633	FAT4	8097288	318.664	0.000175012
79446	WDR25	7976766	486.902	0.000175754
84811	BUD13	7951826	330.552	0.000175997
51588	PIAS4	8024740	342.479	0.00017653
23351	KHNYN	7973732	283.091	0.000177444
7775	ZNF232	8011817	738.918	0.000177999
85464	SSH2	8013965	348.756	0.000178225
25909	AHCTF1	8056220	384.038	0.000180497
55082	ARGLU1	7972723	426.517	0.000180607
9564	BCAR1	8002854	290.548	0.000181428
57547	ZNF624	8013035	428.739	0.000182232
2114	ETS2	8068593	245.363	0.000182358
653604	HIST2H3D	7919589	147.04	0.00018247
5347	PLK1	7994109	266.527	0.000183212
114625	ERMAP	7900609	477.029	0.000183398
10717	AP4B1	7918703	337.732	0.000183685
9462	RASAL2	7907611	287.287	0.000185336
58497	PRUNE	7905299	449.095	0.000185657
7404	UTY	8177137	392.115	0.000185671
126017	ZNF813	8030997	294.284	0.000185822
11083	DIDO1	8067563	320.455	0.000187802
57697	FANCM	7974166	710.888	0.000187832
3759	KCNJ2	8009502	521.492	0.000190447
5778	PTPN7	7923406	749.35	0.000190892
84858	ZNF503	7934553	437.281	0.000191508
158295	MGC24103	8160274	504.429	0.000192029
96764	TGS1	8146482	357.866	0.000193899
10940	POP1	8147548	423.727	0.000194426
646799	ZAR1L	7970887	1349.07	0.000194908
387640	C10orf140	7932498	531.401	0.000195801
54784	ALKBH4	8141757	406.601	0.000196096
4839	NOP2	7960575	363.489	0.000197921
677822	SNORA40	7951038	191.212	0.000198832
91687	CENPL	7922391	322.809	0.000199475
1859	DYRK1A	8068551	271.038	0.000199576
388115	C15orf52	7987511	480.206	0.00020043
64324	NSD1	8110289	367.528	0.000201247
57182	ANKRD50	8102720	360.398	0.000202279
57688	ZSWIM6	8105506	267.46	0.000202333
27309	ZNF330	8097543	312.027	0.000202347
623	BDKRB1	7976567	194.479	0.000202496
57168	ASPHD2	8072108	394.976	0.000203193
100130733	LRRC70	8105579	1386.52	0.000204179
81894	SLC25A28	7935639	396.02	0.000205574
9640	ZNF592	7985605	289.682	0.000205988
402483	FLJ45340	8135931	444.055	0.00020619
7627	ZNF75A	7992877	389.003	0.000207209
54465	ETAA1	8042373	374.422	0.000208628
1662	DDX10	7943690	350.324	0.000209246
5743	PTGS2	7922976	270.886	0.000209282
91056	DKFZp761E198	7949490	389.924	0.000209437
93323	HAUS8	8035236	429.451	0.000210199
1974	EIF4A2	8084704	125.664	0.00021086
162966	ZNF600	8038989	635.536	0.000212659
115004	C6orf150	8127534	358.753	0.000212679
163051	ZNF709	8034395	1135.21	0.000213213
54925	ZNF434	7998967	591.243	0.000213483
692072	SNORD5	7951036	156.661	0.000214622
100033434	SNORD116-23	7981994	728.416	0.000215193
254013	C12orf72	7954701	568.971	0.000215534
23503	ZFYVE26	7979757	347.812	0.000215785
6083	SNORD21	7903022	302.451	0.000218444
84874	ZNF514	8053775	474.577	0.000218542
93463	LOC93463	8059902	930.237	0.000218589
63943	FKBPL	8125316	732.464	0.000218665
63943	FKBPL	8178749	732.464	0.000218665
26778	SNORA70	8170863	241.317	0.000219381
57589	KIAA1432	8154254	269.206	0.000219553
8178	ELL	8035477	293.687	0.000220079
340252	ZNF680	8139820	458.55	0.000220822
55128	TRIM68	7945979	463.815	0.000220843
80824	DUSP16	7961371	284.706	0.000221234
23143	LRCH1	7968976	386.459	0.000222099
388796	LOC388796	8066247	357.538	0.000222269
54856	GON4L	7920810	413.276	0.000222766
26785	SNORD63	8114468	1203.22	0.000223144
4851	NOTCH1	8165217	358.736	0.000226456
100129112	LOC100129112	8017344	540.104	0.000227151
1054	CEBPG	8027566	286.457	0.000227695
339263	C17orf51	8013515	762.585	0.000228244
123228	SENP8	7984626	409.457	0.000228317
7541	ZFP161	8022110	388.801	0.000229185
80311	KLHL15	8171837	474.719	0.000229727
7978	MTERF	8140859	540.481	0.000229965
406946	MIR154	7976850	166.745	0.000230845
284306	ZNF547	8031732	724.915	0.000231224
56905	C15orf39	7984952	280.188	0.000231251
90809	TMEM55B	7977584	288.894	0.000231899
677792	SNORA1	7951032	306.161	0.000231908
347344	ZNF81	8167201	544.16	0.000232506
51366	UBR5	8152148	385.266	0.000232507
10629	TAF6L	7940698	353.873	0.000237602
57336	ZNF287	8013026	650.294	0.000238361
27115	PDE7B	8122222	437.97	0.000239797
79088	ZNF426	8033780	414.707	0.000241532
150383	C22orf40	8076749	256.703	0.000241809
7700	ZNF141	8093336	480.094	0.00024246
56478	EIF4ENIF1	8075507	309.468	0.000242488
25909	AHCTF1	7925622	414.88	0.000243084
55226	NAT10	7939265	301.465	0.000244308
26164	GTPBP5	8063857	403.442	0.000244763
283489	ZNF828	7970376	240.271	0.000245754
284565	NBPF15	7919412	440.573	0.000246181
23060	ZNF609	7984203	193.33	0.000246341
993	CDC25A	8086880	577.032	0.000246899
222255	ATXN7L1	8142100	374.763	0.000248402
148823	C1orf150	7911199	1642.52	0.000248621
81559	TRIM11	7924868	367.404	0.000249686
55818	KDM3A	8043283	383.403	0.000249932
677820	SNORA38	8118207	476.425	0.000252594
9903	KLHL21	7912102	429.852	0.00025561
1399	CRKL	8071434	310.498	0.000255614
84962	JUB	7977854	319.134	0.000255758
1945	EFNA4	7905909	435.523	0.000255769
92595	ZNF764	8000906	354.271	0.00025607
26098	C10orf137	7931239	350.248	0.000256242
677794	SNORA2B	7962829	1191.17	0.000257583
100133106	LOC100133106	8115732	597.755	0.000258358
3858	KRT10	8015104	887.345	0.00025903
7748	ZNF195	7945864	472.885	0.000259117
677773	SCARNA23	8166563	1048.65	0.000260439
7767	ZNF224	8029377	475.488	0.000260967
51545	ZNF581	8031522	288.664	0.000264986
5616	PRKY	8176460	438.498	0.000265069
23049	SMG1	8000687	313.774	0.000265195
57494	RIMKLB	7953765	505.384	0.000265378
100130815	LOC100130815	7981190	2052.92	0.000266348
51301	GCNT4	8112668	373.388	0.000266646
9842	PLEKHM1	8016239	370.198	0.000267566
11066	SNRNP35	7959586	457.5	0.000267851
90333	ZNF468	8038998	406.386	0.000269242
114899	C1QTNF3	8111443	1027.67	0.000269298
729096	BMS1P4	7927550	800.85	0.00027053
677812	SNORA29	8130580	864.877	0.000271289
197407	ZNF48	7994813	501.604	0.000272075
60436	TGIF2	8062319	361.763	0.000272936
24144	TFIP11	8075089	273.713	0.000274784
84722	PSRC1	7918300	373.282	0.000274909
8847	DLEU2	7971653	551.631	0.000276014
1678	TIMM8A	8174047	356.909	0.000276951
7405	UVRAG	7942626	397.148	0.000277068
90007	MIDN	8024228	219.627	0.000278977
120776	OR2D2	7946286	666.057	0.000279036
100129396	FAM106C	8005231	726.586	0.000280627
9759	HDAC4	8060030	444.077	0.000280663
4097	MAFG	8019798	540.355	0.000281674
7799	PRDM2	7898070	280.794	0.000281798
56977	STOX2	8098549	676.832	0.000282646
677825	SNORA44	7914214	353.021	0.000282994
206338	AQPEP	8107429	2006.99	0.000284114
83860	TAF3	7926096	438.891	0.000285919
81930	KIF18A	7947248	449.685	0.000285932
50839	TAS2R10	7961249	807.604	0.000286211
50650	ARHGEF3	8088247	385.43	0.000286271
8427	ZNF282	8137101	336.312	0.000288065
5981	RFC1	8165672	237.417	0.000288262
10052	GJC1	8016094	335.143	0.000288697
2043	EPHA4	8059279	277.77	0.00029093
25788	RAD54B	8151824	678.706	0.000291352
594839	SNORA33	8122144	396.16	0.000291416
64858	DCLRE1B	7904131	403.25	0.000291903
64864	RFX7	7989132	240.135	0.00029267
57649	PHF12	8013812	234.358	0.000293279
348793	WDR53	8093141	272.203	0.000294121
84503	ZNF527	8028241	593.157	0.000294188
5581	PRKCE	8041763	374.505	0.000294212
23304	UBR2	8119529	373.719	0.000294999
468	ATF4	8073148	166.142	0.000295232
221687	RNF182	8116980	423.002	0.000295756
1352	COX10	8005089	382.686	0.000296431
8289	ARID1A	7899220	224.045	0.000298459
54851	ANKRD49	7943231	363.581	0.000299318
29995	LMCD1	8077490	363.325	0.00030076
9682	KDM4A	7900833	354.569	0.00030119
79027	ZNF655	8134631	361.737	0.000304075
51530	ZC3HC1	8142899	379.732	0.000306276
9683	N4BP1	8001317	306.241	0.000306876
57018	CCNL1	8091658	385.127	0.000307301
79753	SNIP1	7915008	357.096	0.000308384
9150	CTDP1	8021884	392.605	0.000308769
23677	SH3BP4	8049435	325.367	0.000309378
78990	OTUB2	7976425	664.297	0.000309626
404734	ANKHD1-EIF4EBP3	8108510	353.644	0.000311145
23765	IL17RA	8071069	321.512	0.000312153
90580	C19orf52	8025783	321.232	0.000312593
57619	SHROOM3	8095834	226.994	0.00031361
51104	FAM108B1	8161727	261.214	0.000314435
100133130	LOC100133130	7933572	974.441	0.00031453
100133130	LOC100133130	7933261	974.441	0.00031453
55615	PRR5	8073705	331.072	0.000314665
115509	ZNF689	8000924	349.38	0.000314952
5325	PLAGL1	8129985	375.014	0.000316012
400657	LOC400657	8023868	369.769	0.000316201
27107	ZBTB11	8089234	348.979	0.000316953
9668	ZNF432	8038942	570.793	0.000317476
3949	LDLR	8025828	289.702	0.00031755
2972	BRF1	7981573	525.227	0.00031769
905	CCNT2	8045381	381.197	0.000318963
6239	RREB1	8116740	274.205	0.000319216
9451	EIF2AK3	8053668	353.028	0.000320218
140459	ASB6	8164572	343.058	0.000320588
6621	SNAPC4	8165131	435.542	0.000321651
84128	WDR75	8046975	340.473	0.000321774
100131997	FAM27E3	8161499	621.881	0.000321815
54896	PQLC2	7898556	369.7	0.000322182
441911	OR10J3	7921445	962.701	0.000323123
90324	CCDC97	8029050	470.633	0.000323233
23411	SIRT1	7927814	319.797	0.000324403
388536	ZNF790	8036357	427.979	0.000324435
83478	ARHGAP24	8096160	349.733	0.000324957
79175	ZNF343	8064514	445.44	0.000327275
147687	ZNF417	8039695	345.01	0.000327407
8897	MTMR3	8072302	439.054	0.000327602
391712	TRIM61	8103520	308.542	0.000327872
442892	MIR148B	7955906	617.131	0.000329857
55072	RNF31	7973584	318.41	0.000330165
347404	LANCL3	8166714	969.44	0.000330606
339559	ZNF642	7900446	634.426	0.000330664
115426	UHRF2	8154316	356.436	0.000330675
2275	FHL3	7915147	275.453	0.000333401
80039	FAM106A	8005687	687.97	0.00033354
7494	XBP1	8075182	257.714	0.000337101
55716	LMBR1L	7963024	296.553	0.000337235
26770	SNORD79	7922406	360.752	0.000337499
54619	CCNJ	7929550	360.509	0.000338794
25845	LOC25845	8110685	369.674	0.000339184
55633	TBC1D22B	8119169	397.639	0.000339277
170506	DHX36	8091562	415.113	0.000339924
3957	LGALS2	8075956	600.275	0.000340317
8345	HIST1H2BH	8117426	81.9029	0.000341747
9853	RUSC2	8155048	318.957	0.000341876
5210	PFKFB4	8086961	496.713	0.000343044
92285	ZNF585B	8036389	352.209	0.00034319
23409	SIRT4	7959148	686.943	0.000344466
91661	ZNF765	8039010	263.518	0.000344501
143684	FAM76B	7951093	565.81	0.0003455
9610	RIN1	7949592	276.028	0.00034551
7566	ZNF18	8012843	532.58	0.000345774
319139	SNORD56B	7975453	1413.79	0.000345985
10161	LPAR6	7971565	373.975	0.000346082
94039	ZNF101	8027233	663.804	0.000346679
2917	GRM7	8077472	1431.27	0.000347069
170959	ZNF431	8027292	623.471	0.000347151
125893	ZNF816A	8039017	578.561	0.000347229
6079	SNORD15A	7942592	397.359	0.000347495
9533	POLR1C	8119842	241.487	0.000348376
9807	IP6K1	8087473	368.698	0.000352726
54993	ZSCAN2	7985577	505.664	0.000354183
284390	ZNF763	8025978	823.205	0.000354914
83932	C1orf124	7910539	351.097	0.000355255
57546	PDP2	7996341	301.691	0.000357293
342945	ZSCAN22	8031908	428.148	0.000357531
4212	MEIS2	7987385	310.627	0.000357599
406937	MIR145	8109159	983.524	0.000358033
65260	C1orf163	7916219	403.956	0.000358374
151295	SLC23A3	8059081	618.16	0.000358812
6492	SIM1	8128459	353.455	0.0003594
100133941	CD24	8177222	949.727	0.000360394
57521	RPTOR	8010512	370.67	0.000361406
51523	CXXC5	8108447	254.737	0.000361461
85459	KIAA1731	7943126	529.563	0.000361586
7020	TFAP2A	8123864	225.765	0.000362075
3991	LIPE	8037186	800.368	0.000362405
163259	DENND2C	7918768	970.425	0.000363668
11067	C10orf10	7933204	517.092	0.000364286
22984	PDCD11	7930226	423.436	0.000365364
54876	DCAF16	8099570	350.01	0.000365969
55295	KLHL26	8027049	431.048	0.000366005
29117	BRD7	8083704	282.051	0.000366182
400931	LOC400931	8073816	280.008	0.000368368
26009	ZZZ3	7917103	330.44	0.000368611
619499	SNORA27	7968234	391.097	0.00036999
4520	MTF1	7915091	250.89	0.000370397
221037	JMJD1C	7933877	173.971	0.000372106
130497	OSR1	8050497	524.867	0.000374048
57799	RAB40C	7991917	399.743	0.000377556
8061	FOSL1	7949532	171.497	0.000378764
4931	NVL	7924558	475.314	0.00038496
79673	ZNF329	8039740	367.922	0.000385405
7852	CXCR4	8055465	728.213	0.000386685
170954	KIAA1949	8124798	280.83	0.000387969
54796	BNC2	8160260	276.529	0.000388054
89890	KBTBD6	7971208	326.915	0.000389685
127	ADH4	8101852	1318.23	0.000389859
65124	ANKRD57	8044301	231.169	0.000390197
54957	TXNL4B	8002660	316.329	0.00039047
201514	ZNF584	8031939	434.556	0.000394027
85451	UNK	8009995	359.47	0.000394042
574040	SNORA6	8078916	357.767	0.000394198
89795	NAV3	7957298	253.188	0.000395047
25850	ZNF345	8028206	880.744	0.000396835
11054	OGFR	8063955	283.013	0.000397504
154313	C6orf165	8121015	1974.27	0.000398056
641451	SNORA19	7936637	750.428	0.000398451
120065	OR5P2	7946323	1490.14	0.000398648
89853	FAM125B	8157905	491.093	0.000400369
7170	TPM3	7920472	500.364	0.00040097
55957	LIN37	8028004	250.224	0.000401622
112950	MED8	7915516	229.727	0.000401763
1871	E2F3	8117128	198.716	0.000402235
442083	HSP90AB5P	8080987	1470.01	0.000402912
93550	ANUBL1	7933237	532.101	0.00040329
26778	SNORA70	8025498	245.865	0.000409416
6908	TBP	8123507	275.07	0.000410155
58489	FAM108C1	7985310	309.902	0.000410187
6662	SOX9	8009517	544.664	0.000411615
23328	SASH1	8122637	317.28	0.000411982
80204	FBXO11	8052024	258.276	0.000412654
9849	ZNF518A	7929562	548.856	0.000412983
406911	MIR125B1	7952307	447.992	0.000413205
317781	DDX51	7967711	453.625	0.000413299
58487	CREBZF	7950796	401.379	0.000413564
126068	ZNF441	8025945	544.155	0.000414121
63898	SH2D4A	8144880	477.656	0.00041488
23368	PPP1R13B	7981460	581.656	0.000415536
2310	FOXO3B	8013307	186.1	0.000415696
117583	PARD3B	8047709	492.066	0.000416722
6821	SUOX	7956097	292.583	0.000416935
162963	ZNF610	8030914	616.943	0.000417009
7673	ZNF222	8029353	582.871	0.000417365
147949	ZNF583	8031640	488.916	0.00041801
29960	FTSJ2	8137826	341.029	0.000418149
203245	NAIF1	8164357	468.756	0.000419367
100129710	MST131	8145766	316.273	0.000419853
23379	KIAA0947	8104350	312.429	0.000419996
407054	MIR98	8173005	1061.45	0.000420958
406948	MIR15A	7971661	545.129	0.000421405
54931	RG9MTD1	8081343	410.299	0.000421921
225	ABCD2	7962312	922.423	0.00042214
54797	MED18	7899448	427.877	0.000422666
2624	GATA2	8090469	269.444	0.000422968
79669	C3orf52	8081645	633.766	0.000423703
6832	SUPV3L1	7927981	328.133	0.000424185
84851	TRIM52	8116534	414.587	0.000424333
259292	TAS2R46	7961293	1235.58	0.000424359
10168	ZNF197	8079204	584.851	0.000428043
112398	EGLN2	8028940	442.693	0.000430127
5994	RFXAP	7968653	652.219	0.000430857
144233	BCDIN3D	7963139	563.233	0.000432973
54439	RBM27	8108927	353.853	0.000433694
25948	KBTBD2	8138922	337.727	0.000437481
158880	USP51	8173174	638.68	0.00043755
23708	GSPT2	8167654	347.675	0.000438392
81832	NETO1	8023828	929.327	0.000438396
10781	ZNF266	8033754	393.663	0.000439738
339318	ZNF181	8027685	396.755	0.000440189
390067	OR52H1	7946087	811.226	0.000441287
64108	RTP4	8084732	310.039	0.000442439
28738	TRAJ17	7973221	1713.34	0.000444459
254048	UBN2	8136516	580.765	0.000447078
11236	RNF139	8148265	226.806	0.000447388
57665	RDH14	8050474	402.542	0.000448038
57191	VN1R1	8039642	980.362	0.000448437
9510	ADAMTS1	8069676	343.018	0.000451785
64895	PAPOLG	8042119	419.211	0.000451914
128497	C20orf165	8066609	641.264	0.000452224
23144	ZC3H3	8153411	332.439	0.0004539
148932	MOBKL2C	7915861	447.28	0.000455634
2960	GTF2E1	8081953	404.913	0.00045592
7752	ZNF200	7998931	389.569	0.000456107
406973	MIR196A2	7955863	998.729	0.000456182
56006	C19orf61	8037389	383.603	0.000456308
285704	RGMB	8107100	285.697	0.000456944
3199	HOXA2	8138718	647.337	0.000457195
85456	TNKS1BP1	7948176	238.792	0.000457626
23117	NPIPL3	8022320	292.706	0.000457807
55888	ZNF167	8079189	520.649	0.000458947
3006	HIST1H1C	8124397	191.583	0.000459769
728661	SLC35E2	7911591	358.695	0.000462712
26507	CNNM1	7929732	316.801	0.000463584
169270	ZNF596	8144230	704.298	0.000464283
401898	ZNF833	8025933	957.262	0.000464813
9972	NUP153	8124059	221.482	0.000466392
84240	ZCCHC9	8106702	375.793	0.000466631
84078	KBTBD7	7971218	535.686	0.000467422
132241	RPL32P3	8090559	452.913	0.000468786
4488	MSX2	8110084	349.636	0.000469311
219844	HYLS1	7945040	724.854	0.000470967
6314	ATXN7	8080878	321.035	0.000472199
133923	ZNF474	8107591	1162.68	0.000476
9300	SNORD28	7948904	194.11	0.000476542
22993	HMGXB3	8109201	299.43	0.000478144
84181	CHD6	8066303	331.866	0.000479463
65251	ZNF649	8038913	300.409	0.000479622
85009	MGC16025	8060061	863.645	0.000480395
57615	ZNF492	8027345	744.157	0.000480425
10926	DBF4	8133976	574.523	0.000484227
158431	ZNF782	8162639	856.805	0.000487398
55324	ABCF3	8084360	374.823	0.000487826
260425	MAGI3	7904106	287.22	0.000488659
26152	ZNF337	8065517	420.554	0.000489424
25	ABL1	8158725	287.382	0.000491901
57707	KIAA1609	8003158	459.469	0.000492019
83417	FCRL4	7921259	1592.2	0.000492644
3570	IL6R	7905789	465.625	0.000492712
55709	KBTBD4	7947917	359.875	0.000493564
148022	TICAM1	8032899	577.915	0.00049395
1906	EDN1	8116921	580.734	0.000494231
57862	ZNF410	7975645	312.351	0.000494443
91120	ZNF682	8035782	821.576	0.000496
23076	RRP1B	8068902	538.694	0.000496616
5465	PPARA	8073826	382.541	0.000497842
55181	C17orf71	8008795	336.578	0.000498937
10501	SEMA6B	8032839	645.015	0.000502486
63971	KIF13A	8124088	349.129	0.000502561
548321	FAM27A	8155521	345.105	0.000503185
152302	CIDECP	8085276	420.812	0.000503638
93134	ZNF561	8033795	327.158	0.000503725
8970	HIST1H2BJ	8124484	348.416	0.000504246
9923	ZBTB40	7898750	480.803	0.000504256
23033	DOPEY1	8120883	401.936	0.000504279
26804	SNORD45B	7902400	219.41	0.000504491
441194	PMS2CL	8131444	519.264	0.000504637
160777	CCDC60	7959108	1240.99	0.000504896
100130428	LOC100130428	7952451	478.115	0.000505789
3017	HIST1H2BD	8117382	292.224	0.000506016
7762	ZNF215	7938183	450.851	0.000506073
8867	SYNJ1	8070010	493.146	0.000506163
9817	KEAP1	8034034	383.071	0.000506648
8567	MADD	7939767	398.402	0.000506658
55609	ZNF280C	8175076	446.412	0.000508156
55061	SUSD4	7924508	821.667	0.000508537
203523	ZNF449	8170015	569.54	0.000508807
23002	DAAM1	7974697	709.002	0.000509447
7545	ZIC1	8083233	671.789	0.000510281
257044	C1orf101	7911056	892.883	0.000511396
5930	RBBP6	7994161	319.916	0.000513654
91748	C14orf43	7980051	343.845	0.000514563
51490	C9orf114	8164481	535.068	0.000515438
8324	FZD7	8047487	310.846	0.000516226
79697	C14orf169	7975595	488.947	0.000516668
8487	SIP1	7974054	534.419	0.000517587
2650	GCNT1	8155930	522.97	0.000518289
55762	ZNF701	8030950	552.184	0.000518578
400954	EML6	8042040	545.91	0.000520167
7156	TOP3A	8013222	414.286	0.000521752
80039	FAM106A	8013268	688.137	0.000522792
57169	ZNFX1	8066905	242.525	0.000525445
10199	MPHOSPH10	8042588	239.216	0.00052862
120406	FAM55B	7944023	1466.25	0.000528941
221955	DAGLB	8138091	322.343	0.000529037
55172	C14orf104	7978838	466.452	0.000529063
147837	ZNF563	8034370	1100.4	0.000531645
401472	FLJ45248	8147721	829.407	0.000531848
2122	MECOM	8091972	759.694	0.000531988
401459	FLJ46365	8146388	746.925	0.000532287
55211	DPPA4	8089448	975.41	0.000532991
121274	ZNF641	7962794	425.459	0.000534456
346389	MACC1	8138466	1241.59	0.00053697
7186	TRAF2	8159476	553.004	0.000538347
26813	SNORD36C	8158998	227.512	0.000538387
54790	TET2	8096675	361.057	0.000539699
8357	HIST1H3H	8117589	253.402	0.000539886
84749	USP30	7958439	442.151	0.000540896
91614	DEPDC7	7939173	671.863	0.00054317
9472	AKAP6	7973850	274.535	0.00054362
84614	ZBTB37	7907486	667.062	0.00054418
57522	SRGAP1	7956759	288.88	0.000545929
9589	WTAP	8123129	320.662	0.000549332
4800	NFYA	8119408	227.399	0.000549624
1316	KLF6	7931810	387.141	0.000550098
51182	HSPA14	7926299	467.518	0.000550823
678	ZFP36L2	8051814	164.965	0.000551564
6100	RP9	8138950	313.487	0.00055164
155435	RBM33	8137558	482.721	0.000551898
4739	NEDD9	8123936	465.075	0.000553142
8480	RAE1	8063566	311.064	0.000553508
23132	RAD54L2	8080100	401.14	0.000556957
54221	SNTG2	8039977	693.217	0.00055775
22798	LAMB4	8142232	1020.08	0.00055886
23269	MGA	7982957	452.879	0.000564925
51651	PTRH2	8017143	307.793	0.000565746
83744	ZNF484	8162449	395.009	0.000566876
286827	TRIM59	8091757	421.314	0.000567393
4137	MAPT	8016263	522.243	0.000569231
54941	RNF125	8020806	795.622	0.000569611
56172	ANKH	8104590	588.613	0.000569873
8091	HMGA2	7964736	536.558	0.000570414
57630	SH3RF1	8103630	380.169	0.000570946
7702	ZNF143	7938331	432.929	0.000573098
100379132	SNORA70G	7964830	617.587	0.000574714
26094	DCAF4	7975506	360.359	0.000574772
1646	AKR1C2	7931832	409.596	0.000575181
339883	C3orf35	8078605	996.053	0.000580753
4216	MAP3K4	8123274	372.3	0.000581875
148156	ZNF558	8033667	396.65	0.000582618
81545	FBXO38	8109062	363.599	0.000582773
128637	TBC1D20	8064336	272.636	0.000584462
9363	RAB33A	8169898	401.686	0.000586373
8242	KDM5C	8172827	369.516	0.000587416
10602	CDC42EP3	8051573	243.549	0.000589832
7562	ZNF708	8035803	782.309	0.000589974
7132	TNFRSF1A	7960518	313.732	0.000592836
115572	FAM46B	7914015	463.36	0.000593661
27185	DISC1	7910559	890.186	0.000593892
375341	C3orf62	8087374	450.99	0.000594661
54471	SMCR7L	8073135	505.456	0.000597645
8412	BCAR3	7917754	222.82	0.000598568
54883	CWC25	8014738	414.055	0.000600268
253582	C6orf191	8129476	2495.82	0.000603128
9303	SNORD25	7948910	122.152	0.000603878
9266	CYTH2	8030049	469.043	0.000605687
51065	RPS27L	7989493	294.231	0.000605919
26058	GIGYF2	8049199	409.803	0.000607288
79913	ACTR5	8062545	452.758	0.000608209
382	ARF6	7974249	233.623	0.000609894
7621	ZNF70	8074931	334.404	0.000610233
9044	BTAF1	7929201	392.197	0.000610479
387790	LOC387790	7942647	423.262	0.000610491
388507	ZNF788	8025992	909.435	0.000611146
2000	ELF4	8175039	363.035	0.000611181
10363	HMG20A	7985119	392.068	0.000612334
9293	GPR52	7907531	839.153	0.000612921
23185	LARP4B	7931728	320.908	0.00061312
389289	C5orf39	8111925	761.577	0.000613284
3101	HK3	8115957	980.893	0.000614307
387119	C6orf204	8129193	647.267	0.000614868
687	KLF9	8161648	293.309	0.000616116
51603	METTL13	7907353	304.634	0.000617717
54799	MBTD1	8016789	502.527	0.000618025
64784	CRTC3	7986049	305.139	0.000619082
29104	N6AMT1	8069700	333.152	0.000620496
345274	SLC10A6	8101609	449.033	0.000622201
11143	MYST2	8008213	293.449	0.000622815
283970	PDXDC2	7997239	347.982	0.000623702
652904	LOC652904	8166630	664.893	0.000623746
94236	HEJ1	7903401	1594.37	0.000624532
9422	ZNF264	8031690	318.773	0.000624638
284023	LOC284023	8012282	621.44	0.000624997
30834	ZNRD1	8179055	295.784	0.000626627
127495	LRRC39	7917996	1216.09	0.000627293
152485	ZNF827	8103025	282.495	0.000627384
3090	HIC1	8003719	568.029	0.000629649
80035	C15orf28	7990027	636.8	0.000630059
10936	GPR75	8052143	289.16	0.000632277
94241	TP53INP1	8151890	329.95	0.00063369
55802	DCP1A	8088128	297.827	0.000634103
728039	C21orf122	8070867	398.203	0.000636354
10628	TXNIP	7904726	388.445	0.000636492
51537	MTP18	8072346	724.176	0.000637273
200424	TET3	8042811	545.898	0.00063758
79000	C1orf135	7913852	514.962	0.000638118
4297	MLL	7944223	394.511	0.000639423
153090	DAB2IP	8157610	318.205	0.000642865
22828	RBM16	8122909	330.929	0.00064327
23211	ZC3H4	8037856	312.367	0.000643271
389072	PLEKHM3	8058509	433.806	0.000643876
3660	IRF2	8103911	347.247	0.000648011
7014	TERF2	8002289	339.473	0.000651998
6002	RGS12	8093764	697.324	0.000652284
57604	C8orf79	8144712	529.801	0.000652883
55582	KIF27	8162019	891.608	0.000653839
56260	C8orf44	8146711	649.382	0.00065411
200845	KCTD6	8080804	490.352	0.000654938
9572	NR1D1	8014956	333.615	0.000656551
3156	HMGCR	8106280	295.086	0.000657069
6294	SAFB	8024936	342.644	0.00065755
692234	SNORD103A	7914324	546.394	0.00065888
692234	SNORD103A	7914322	546.394	0.00065888
2668	GDNF	8111670	466.792	0.000662498
79364	ZXDC	8090351	397.411	0.000665181
1387	CREBBP	7999044	221.003	0.000665741
148266	ZNF569	8036395	610.959	0.000667137
147429	C18orf16	8020717	976.137	0.000667399
10276	NET1	7925954	278.036	0.000668426
3359	HTR3A	7943969	476.476	0.000669227
378884	NHLRC1	8124129	612.992	0.00066982
4144	MAT2A	8043187	345.528	0.000671027
338799	LOC338799	7967210	555.682	0.000672005
862	RUNX1T1	8151768	358.279	0.000677259
79845	RNF122	8150186	453.91	0.000680324
10020	GNE	8161174	478.8	0.0006814
1060	CENPC1	8100603	373.506	0.000681644
10513	APPBP2	8017235	322.219	0.000681699
10847	SRCAP	7994889	319.39	0.000683948
285672	SFRS12IP1	8112337	636.887	0.000686841
283932	NCRNA00095	8000957	1049.61	0.000688323
55795	PCID2	7972888	397.583	0.000688895
10614	HEXIM1	8007745	319.132	0.00069043
160518	DENND5B	7962151	509.399	0.000690619
55809	TRERF1	8126428	330.192	0.000690948
375719	AQP7P1	8161488	1100.68	0.000692523
23542	MAPK8IP2	8074108	406.818	0.00069502
54531	MIER2	8032009	437.479	0.000695154
7596	ZNF45	8037433	382.94	0.000695251
26824	RNU11	7899502	207.007	0.000698217
5966	REL	8042144	409.589	0.000700726
90011	KIR3DX1	8031200	525.519	0.000703384
23387	SIK3	7951873	347.033	0.000704377
26798	SNORD51	8047778	545.194	0.000706639
7310	ZRSR1	8107353	429.991	0.000708098
84787	SUV420H2	8031466	577.7	0.000713056
139324	HDX	8173848	769.022	0.000713474
10642	IGF2BP1	8008151	409.265	0.000716138
1969	EPHA2	7912706	341.909	0.000716614
1527	TEX28	8176018	695.388	0.000717048
84294	UTP23	8147994	278.78	0.000719762
55695	NSUN5	8140020	335.78	0.000721837
252884	ZNF396	8022892	1296.19	0.000722981
83868	TTTY13	8177282	476.521	0.000723903
375449	MAST4	8105741	361.478	0.000733195
129790	C7orf13	8144082	481.683	0.000735741
1612	DAPK1	8156199	573.494	0.000738501
83541	FAM110A	8060370	450.145	0.000738994
51547	SIRT7	8019296	466.866	0.000740785
58985	IL22RA1	7913768	748.786	0.000742681
29855	UBN1	7993035	323.105	0.000744651
100131997	FAM27E3	8161446	729.279	0.000745429
4234	METTL1	8171876	410.816	0.00074803
7091	TLE4	8156060	239.602	0.000749841
10179	RBM7	7944006	267.216	0.000750009
54915	YTHDF1	8067593	325.69	0.000750923
677833	SNORA54	7945801	745.305	0.000751841
23177	CEP68	8042326	563.212	0.000751994
221178	SPATA13	7968035	375.12	0.000752155
8726	EED	7942914	318.726	0.000753508
90060	CCDC120	8167430	621.522	0.000755144
65987	KCTD14	7950641	438.257	0.000757669
9852	EPM2AIP1	8086141	381.008	0.000758578
51441	YTHDF2	7899519	298.313	0.000759374
56884	FSTL5	8103483	723.512	0.00075953
200765	TIGD1	8059770	372.861	0.000760439
51069	MRPL2	8126512	338.645	0.000760489
116238	TLCD1	8013771	498.183	0.000760677
55668	C14orf118	7975863	362.211	0.000760748
23768	FLRT2	7976073	391.764	0.000760798
23338	PHF15	8108080	411.673	0.000763826
57491	AHRR	8104180	310.573	0.000764838
51773	RSF1	7950606	496.663	0.000766365
144577	C12orf66	7964677	574.912	0.000766824
245930	DEFB116	8065552	1797.16	0.000767415
284433	OR10H5	8026488	571.223	0.000769112
9750	FAM65B	8124280	317.756	0.000770022
2498	FTHL3	8051133	326.615	0.000772858
9989	PPP4R1	8022251	352.15	0.000775947
53918	PELO	8105229	417.734	0.000776858
2535	FZD2	8007637	375.558	0.00077981
79869	CPSF7	7948574	362.44	0.000780971
26093	CCDC9	8029894	480.818	0.000784192
54567	DLL4	7982854	405.143	0.000784725
23174	ZCCHC14	8003263	638.108	0.000784867
80335	WDR82	8087874	316.473	0.000785801
2011	MARK2	7940798	383.234	0.000786871
440689	HIST2H2BF	7919584	351.144	0.000787489
91107	TRIM47	8018494	565.492	0.000792771
2828	GPR4	8037614	427.038	0.000794069
151009	LOC151009	8054517	388.341	0.000796482
283970	PDXDC2	7994559	359.037	0.00079756
6482	ST3GAL1	8153021	423.481	0.000798552
79018	C17orf39	8005305	354.669	0.000798647
10379	IRF9	7973618	373.288	0.000799185
4795	NFKBIL1	8177967	461.693	0.000799588
4795	NFKBIL1	8179249	461.693	0.000799588
4795	NFKBIL1	8118127	461.693	0.000799588
285961	SEPT7L	7933115	332.467	0.000802292
54971	BANP	7997755	383.012	0.000803342
55626	AMBRA1	7947652	499.23	0.000809185
25898	RCHY1	8101013	450.341	0.000809904
4649	MYO9A	7990092	461.379	0.000809975
388695	LYSMD1	7919923	584.273	0.000810247
10042	HMGXB4	8072645	338.124	0.000810871
56923	NMUR2	8115368	1462.69	0.000813552
9851	KIAA0753	8011945	418.563	0.000821313
285237	C3orf38	8081073	343.806	0.000821369
8535	CBX4	8019018	376.724	0.000822456
9986	RCE1	7941732	458.862	0.000823304
23294	ANKS1A	8118863	410.802	0.0008235
55160	ARHGEF10L	7898483	559.255	0.000826384
9869	SETDB1	7905258	375.489	0.000828195
5915	RARB	8078286	369.405	0.000829784
197320	ZNF778	7997896	676.001	0.000831436
114609	TIRAP	7945086	686.098	0.000833097
116138	KLHDC3	8119648	286.685	0.000833875
79097	TRIM48	7939912	811.722	0.000835405
1959	EGR2	7933872	638.184	0.000835678
222699	LOC222699	8124551	584.894	0.000835997
55247	NEIL3	8098423	334.921	0.000836696
401114	FLJ35816	8093453	913.016	0.000837242
222255	ATXN7L1	8142096	474.999	0.000839264
1277	COL1A1	8016646	417.37	0.000839548
574448	MIR202	7937148	1255.26	0.000840815
54986	ULK4	8086372	713.762	0.000842503
51152	LOC51152	8071051	438.85	0.000842585
644316	FLJ43315	8077198	520.423	0.000842591
388730	TMEM81	7923707	1892.94	0.000845055
92344	GORAB	7907213	305.03	0.000846721
27165	GLS2	7964183	674.938	0.000848749
144455	E2F7	7965094	353.149	0.000850076
63897	HEATR6	8017186	329.039	0.000850812
84182	FAM188B	8132097	483.584	0.000851509
8527	DGKD	8049317	539.012	0.000851692
27301	APEX2	8167854	479.09	0.000852103
219902	TMEM136	7944554	408.214	0.000856644
155061	ZNF746	8143725	334.919	0.000858112
245940	DEFB130	8149353	1372.9	0.000858962
245940	DEFB130	8149377	1372.9	0.000858962
7942	TFEB	8126312	625.778	0.000864036
57677	ZFP14	8036304	810.478	0.00086494
140290	TCP10L	8069991	1558.34	0.000865785
29110	TBK1	7956795	322.936	0.000865894
2549	GAB1	8097586	374.312	0.000866961
55344	PLCXD1	8165711	425.013	0.000867132
112611	RWDD2A	8120927	279.906	0.000867883
9020	MAP3K14	8016194	493.737	0.000870586
9675	KIAA0406	8066200	408.074	0.00087107
51193	ZNF639	8084035	369.866	0.000871504
731220	RFX8	8054344	576.315	0.000871826
150275	CCDC117	8072153	336.942	0.000872314
79160	MGC4294	8063634	705.463	0.00087303
23567	ZNF346	8110253	424.272	0.000875111
132884	EVC2	8099144	636.063	0.000876025
154664	ABCA13	8132743	1054.67	0.000877898
84859	LRCH3	8085000	283.47	0.000878136
392509	ARL13A	8168781	1371.43	0.000879649
54658	UGT1A1	8049349	1229.64	0.000880983
124997	WDR81	8003639	415.197	0.000884041
29035	C16orf72	7993159	306.435	0.000887242
3269	HRH1	8077851	536.033	0.0008875
79691	QTRTD1	8081786	397.497	0.000890029
246175	CNOT6L	7989128	369.841	0.000890282
9284	NPIP	7999766	269.522	0.000892804
114991	ZNF618	8157362	506.683	0.000895087
100289668	LOC100289668	7986525	331.179	0.000895834
100289668	LOC100289668	7986515	331.179	0.000895834
10251	SPRY3	8171034	822.509	0.000896851
10251	SPRY3	8176955	822.509	0.000896851
64412	GZF1	8061373	440.986	0.000896992
54807	ZNF586	8031821	522.14	0.000901422
389763	FLJ46321	8156103	865.838	0.000901829
4084	MXD1	8042503	478.308	0.000903395
57703	CWC22	8057441	410.05	0.000903678
80196	RNF34	7959282	335.257	0.000904558
23063	WAPAL	7934812	362.75	0.000906667
6671	SP4	8131709	571.667	0.000906875
636	BICD1	7954717	402.071	0.000907144
222484	LNX2	7970716	402.643	0.000909402
4598	MVK	7958565	374.47	0.000909915
7753	ZNF202	7952361	666.196	0.000910811
84678	KDM2B	7967175	462.777	0.000911066
645524	FLJ36840	8144228	569.482	0.000914374
5293	PIK3CD	7897482	441.084	0.000914589
51274	KLF3	8094599	333.609	0.000914805
613210	DEFB136	8149347	1639.52	0.000915431
6334	SCN8A	7955502	394.372	0.000916287
54943	DNAJC28	8070097	824.208	0.000916413
374655	ZNF710	7985924	283.428	0.000918401
441250	TYW1B	8139935	394.564	0.000920708
602	BCL3	8029465	324.462	0.000921056
164781	WDR69	8048870	1326.08	0.000921182
7008	TEF	8073422	340.889	0.000921487
2968	GTF2H4	8118023	561.577	0.000922587
10902	BRD8	8114365	328.005	0.000924763
170712	COX7B2	8100127	1291.69	0.000927791
93953	ACRC	8168345	816.901	0.000929128
54764	ZRANB1	7931226	303.777	0.000933071
4161	MC5R	8020339	613.023	0.000933602
5787	PTPRB	7964872	1480.38	0.000934939
8799	PEX11B	7904755	281.589	0.000935251
64746	ACBD3	7924701	352.334	0.00093625
3925	STMN1	7913864	890.524	0.000938049
7637	ZNF84	7960143	700.082	0.000938305
388558	ZNF808	8030946	316.463	0.000939447
9569	GTF2IRD1	8133477	421.608	0.000940265
64794	DDX31	8164742	489.248	0.000942102
53353	LRP1B	8055496	2332.39	0.000942453
8846	ALKBH1	7980454	260.849	0.000942668
9739	SETD1A	7994985	350.405	0.00094468
11174	ADAMTS6	8112342	577.62	0.000945019
9099	USP2	7952249	1253.6	0.000945155
705	BYSL	8119492	308.153	0.000945375
1677	DFFB	7897210	636.44	0.000947686
57147	SCYL3	7907183	779.603	0.00094793
6637	SNRPG	8052861	456.48	0.000948674
57178	ZMIZ1	7928558	249.255	0.00095013
4091	SMAD6	7984353	481.753	0.000952115
25774	GSTTP1	8074972	1043.18	0.000953337
57528	KCTD16	8108905	878.714	0.000958964
6047	RNF4	8093590	423.047	0.000960202
5977	DPF2	7941243	247.301	0.000961048
9489	PGS1	8010271	422.562	0.00096751
23160	WDR43	8041149	349.498	0.000970298
653635	WASH7P	7911309	463.56	0.000970738
79890	RIN3	7976292	333.254	0.000971069
84289	ING5	8077226	512.448	0.000973528
5732	PTGER2	7974366	916.063	0.000975659
56985	C17orf48	8004940	516.554	0.000977298
7508	XPC	8085486	463.024	0.00098103
51684	SUFU	7930120	448.776	0.000983639
51312	SLC25A37	8145281	385.193	0.000989239
124274	GPR139	7999916	389.668	0.00098978
50945	TBX22	8168534	1074.3	0.000991184
26148	C10orf12	7929609	422.321	0.000991291
10677	AVIL	7964575	535.606	0.000992752
1025	CDK9	8158112	404.929	0.000992867
58488	PCTP	8008598	424.719	0.000993144
6357	CCL13	8006459	1231.4	0.000994902
57093	TRIM49	7943036	1317.8	0.000995371
374454	KRT77	7963502	857.47	0.000995621
2909	GRLF1	8029856	369.066	0.000997017
401251	C6orf26	8178080	582.401	0.000998152
81875	ISG20L2	7921110	341.799	0.000999533
26589	MRPL46	7991209	282.67	0.00100175
84660	CCDC62	7959484	895.574	0.00100218
84657	C3orf42	8077815	626.907	0.00100224
146456	TMED6	8002283	714.745	0.00100321
9658	ZNF516	8023882	402.198	0.00100542
283685	GOLGA6L2	7986744	572.619	0.0010083
25988	HINFP	7944435	479.006	0.00101101
643210	FLJ40292	8159732	515.272	0.00101402
406	ARNTL	7938563	755.474	0.00101403
4140	MARK3	7977077	448.684	0.00101862
79894	ZNF672	7911289	420.627	0.00101874
1915	EEF1A1	8127544	251.845	0.0010218
10799	RPP40	8123717	451.679	0.00102199
4487	MSX1	8093852	749.093	0.00102373
341350	OVCH1	7962029	932.017	0.00102426
54620	FBXL19	7994967	716.482	0.0010269
23550	PSD4	8044584	620.491	0.00102777
90102	PHLDB2	8081590	376.889	0.00102987
653583	PHLDB3	8037309	379.052	0.0010326
149992	C21orf99	8067825	1588.29	0.00103301
7286	TUFT1	7905428	482.622	0.0010353
9698	PUM1	7914296	310.838	0.00103751
196513	DCP1B	7960320	353.764	0.00103751
84957	RELT	7942439	545.897	0.00103783
23310	NCAPD3	7952830	505.955	0.00104128
100127980	LOC100127980	8036302	569.571	0.00104617
54532	USP53	8097098	461.822	0.00104662
9015	TAF1A	7924476	464.978	0.00104754
9443	MED7	8115476	390.436	0.00104826
8831	SYNGAP1	8118696	656.656	0.00105106
121504	HIST4H4	7961483	555.186	0.00105178
8353	HIST1H3E	8117415	518.812	0.00105327
51010	EXOSC3	8161242	308.788	0.00105347
84665	MYPN	7927827	282.448	0.00105549
6299	SALL1	8001387	243.331	0.0010567
84133	ZNRF3	8072160	476.76	0.00105909
5460	POU5F1	8178470	559.958	0.00105958
406924	MIR134	7976844	449.682	0.00106019
4775	NFATC3	7996744	419.724	0.00106132
399821	FLJ37035	7936925	752.752	0.0010621
1955	MEGF9	8163775	414.937	0.00106489
80853	JHDM1D	8143341	751.579	0.00106523
375719	AQP7P1	8161558	1093.77	0.00106622
100131997	FAM27E3	8155514	660.509	0.00106941
283970	PDXDC2	8000537	371.993	0.00107008
283970	PDXDC2	8000501	371.993	0.00107008
777	CACNA1E	7907911	876.083	0.00107043
9733	SART3	7966098	412.508	0.00107092
196968	C15orf51	7986520	317.537	0.00107177
407975	MIR17HG	7969576	1316.78	0.00107261
60529	ALX4	7947563	681.867	0.00107273
23235	SIK2	7943760	418.479	0.00107501
56256	SERTAD4	7909503	292.81	0.00107585
84914	ZNF587	8031837	272.84	0.00107876
132949	AASDH	8100478	528.094	0.0010792
9392	TGFBRAP1	8054364	299.096	0.00108004
9495	AKAP5	7975066	1731.74	0.00108023
23383	KIAA0892	8027184	466.182	0.00108065
692233	SNORD117	8124940	636.69	0.00108085
6860	SYT4	8022986	719.14	0.00108116
2444	FRK	8129071	1299.8	0.00108221
92610	TIFA	8102362	532.57	0.00108462
51531	C9orf156	8162706	726.322	0.00108508
11330	CTRC	7898167	877.441	0.0010888
406954	MIR181A2	8157800	1031.3	0.00109032
10794	ZNF460	8031714	366.008	0.00109171
169166	SNX31	8152062	1293.26	0.00109187
55909	BIN3	8149707	303.381	0.00109219
653316	FAM153C	8110417	680.842	0.00109316
152110	NEK10	8085867	627.075	0.00109337
262	AMD1	8121489	306.721	0.00109402
9108	MTMR7	8149485	952.782	0.00109629
85236	HIST1H2BK	8068898	186.358	0.00109648
55100	WDR70	8104998	433.656	0.00109703
91442	C19orf40	8027510	514.46	0.00109712
57534	MIB1	8020423	394.489	0.00109776
140809	SRXN1	8064382	557.208	0.00110252
8303	SNN	7993259	456.959	0.00110315
80737	C6orf27	8125072	775.714	0.00110334
3004	GZMM	8023977	705.809	0.00110481
26108	PYGO1	7989069	475.201	0.00110734
79101	TAF1D	7951008	182.074	0.00110762
54617	INO80	7987584	361.36	0.00111112
353355	ZNF233	8029423	648.087	0.00111413
643162	DKFZP779L1853	7955110	1008.68	0.00111472
51281	ANKMY1	8060103	571.106	0.0011164
3817	KLK2	8030768	971.117	0.00111947
389827	TMEM8C	8164931	814.919	0.0011196
8676	STX11	8122457	570.402	0.00112102
54510	PCDH18	8102792	397.125	0.00112182
8200	GDF5	8065905	624.97	0.00112714
60370	AVPI1	7935521	317.309	0.00112889
84220	RGPD5	8054676	463.954	0.00113671
1659	DHX8	8007505	352.441	0.00114098
60494	CCDC81	7942941	1029.6	0.0011439
5150	PDE7A	8151074	750.474	0.00114465
55693	KDM4D	7943282	719.094	0.00114646
10748	KLRA1	7961198	1604.54	0.00114654
100132288	LOC100132288	8071044	509.109	0.00114738
2147	F2	7939706	664.13	0.00114798
10672	GNA13	8017711	253.408	0.00114817
677797	SNORA7B	8090565	173.156	0.00115168
8833	GMPS	8083523	368.672	0.0011522
79813	EHMT1	8159702	362.407	0.00115257
441376	C8orf85	8148000	632.303	0.00115542
6161	RPL32	8085407	356.189	0.00115596
100131454	ELP2P	8003619	535.916	0.00115703
990	CDC6	8007071	521.945	0.00115852
57701	NCKAP5L	7963134	479.938	0.00115882
57217	TTC7A	8041826	516.654	0.00116079
128312	HIST3H2BB	7910369	784.498	0.00116178
81228	OR5AK3P	7939998	1093.16	0.00116199
196968	C15orf51	7986509	312.114	0.00116334
100289668	LOC100289668	7986512	312.114	0.00116334
100289668	LOC100289668	7986527	312.114	0.00116334
7984	ARHGEF5	8143610	703.519	0.00116475
375444	C5orf34	8111960	596.1	0.00116852
3398	ID2	8040103	177.36	0.00117038
339122	RAB43	8090529	361.778	0.00117102
57661	PHRF1	7937415	338.335	0.00117215
55227	LRRC1	8120279	439.101	0.0011739
388910	NCRNA00207	8073698	786.774	0.0011808
79596	RNF219	7972180	386.67	0.00118184
6157	RPL27A	7938286	360.926	0.00118482
27177	IL1F8	8054731	1853.99	0.00118501
6659	SOX4	8117165	386.98	0.00118763
2701	GJA4	7899939	596.332	0.00118848
2564	GABRE	8175666	462.49	0.00118913
221692	PHACTR1	8116932	664.351	0.00119043
29986	SLC39A2	7973135	1424.5	0.00119091
57567	ZNF319	8001651	632.554	0.00119171
84981	C17orf91	8011193	302.749	0.00119329
79866	C13orf34	7969374	529.691	0.00119386
23163	GGA3	8018324	497.033	0.0011965
150290	DUSP18	8075423	418.877	0.00119983
55252	ASXL2	8050875	236.504	0.00120285
84135	UTP15	8106193	434.075	0.00120322
10081	PDCD7	7989725	327.995	0.00120713
445372	TRIM6-TRIM34	7938012	857.926	0.00120964
55734	ZFP64	8067094	336.409	0.0012102
55106	SLFN12	8014241	462.478	0.00121086
158586	ZXDB	8167942	301.161	0.00121205
6839	SUV39H1	8167347	473.252	0.00121703
6430	SFRS5	7975368	335.587	0.00122277
140461	ASB8	7962783	374.366	0.00122941
8816	DCAF5	7979849	343.971	0.00123215
5978	REST	8095262	477.706	0.00123339
26057	ANKRD17	8100902	310.744	0.00123594
10866	HCP5	8118111	887.826	0.00123614
55924	C1orf183	7918552	658.686	0.00123881
654321	SNORA75	8059708	580.278	0.00123968
79833	GEMIN6	8041553	546.575	0.00123971
23522	MYST4	7928491	298.992	0.00124038
80895	ILKAP	8059969	426.373	0.00124229
168455	FLJ36031	8142136	311.438	0.00124578
1477	CSTF1	8063484	335.774	0.00124842
677836	SNORA58	8090688	1338.48	0.00124848
554226	NCRNA00164	8055297	1221.31	0.00124959
65243	ZNF643	7900438	788.513	0.00124994
7798	LUZP1	7913558	356.463	0.00125417
84816	RTN4IP1	8128606	647.195	0.00125555
80789	INTS5	7948772	389.079	0.0012572
54861	SNRK	8079140	395.981	0.00125926
55892	MYNN	8083794	495.202	0.00125944
9181	ARHGEF2	7920877	320.196	0.00126303
11180	WDR6	8079693	360.125	0.00126459
81628	TSC22D4	8141526	449.793	0.00127303
126074	C19orf39	8025888	692.104	0.00127691
4920	ROR2	8162283	498.988	0.00127827
84436	ZNF528	8030931	611.443	0.00127986
54925	ZNF434	7992895	784.5	0.00128254
8048	CSRP3	7947099	1685.61	0.001286
2196	FAT2	8115302	1432.52	0.00128619
2526	FUT4	7943236	474.984	0.00128675
284110	GSDMA	8006968	745.482	0.0012868
100131613	LOC100131613	7964868	1236.59	0.00128806
54778	RNF111	7983953	346.299	0.00128844
29945	ANAPC4	8094408	542.184	0.0012927
170960	ZNF721	8098758	555.201	0.00129506
83743	GRWD1	8030035	377.14	0.00129553
677795	SNORA5B	8139486	584.757	0.00129909
163786	SASS6	7917976	685.745	0.00130202
55731	C17orf63	8013776	333.134	0.00130525
7626	ZNF75D	8175319	636.839	0.00130626
677781	SCARNA16	8010137	438.29	0.00131061
79149	ZSCAN5A	8039577	625.282	0.00131123
94162	SNORD38A	7901050	623.371	0.00131639
7366	UGT2B15	8100746	2410.09	0.0013164
7366	UGT2B15	8100737	2410.09	0.0013164
747	DAGLA	7940508	572.522	0.0013206
91752	ZNF804A	8046815	661.162	0.00132134
2259	FGF14	7972650	1177.15	0.00132202
163059	ZNF433	8034320	617.099	0.00132299
57727	NCOA5	8066668	346.659	0.00132361
55534	MAML3	8102862	606.321	0.00132456
389649	C8orf86	8150352	1059.71	0.00132467
23023	TMCC1	8090630	413.512	0.0013271
100289635	ZNF605	7967863	503.883	0.00133459
283598	C14orf177	7976635	897.192	0.00133623
100132288	LOC100132288	8177120	600.921	0.00133776
5292	PIM1	8119161	501.185	0.00134084
146705	C17orf56	8019136	608.649	0.00134835
96459	FNIP1	8113914	444.896	0.00135189
1446	CSN1S1	8095412	1843.98	0.0013528
115265	DDIT4L	8101952	370.782	0.00135528
23499	MACF1	7900235	335.371	0.00135707
163882	CNST	7911138	458.856	0.00135948
4277	MICB	8118116	346.959	0.00136006
54522	ANKRD16	7931888	490.997	0.00136007
56893	UBQLN4	8091352	491.673	0.00136287
1527	TEX28	8176012	668.976	0.00136749
1527	TEX28	8176006	668.976	0.00136749
574410	MIR453	7976848	490.125	0.0013676
54581	SCAND2	7985587	634.937	0.00136839
1130	LYST	7925257	491.718	0.00136887
7088	TLE1	8161919	415.405	0.00137129
653489	RGPD3	8054414	478.451	0.00137139
4209	MEF2D	7921014	290.317	0.00137195
9175	MAP3K13	8084589	574.069	0.00137538
84254	CAMKK1	8011480	581.391	0.00137552
578	BAK1	8125766	378.814	0.00137745
1052	CEBPD	8150592	357.218	0.00137997
4863	NPAT	7951497	405.66	0.00138221
49854	ZNF295	8070557	248.106	0.00138509
84948	TIGD5	8148655	363.11	0.00138596
6336	SCN10A	8086255	1398.66	0.00138714
8471	IRS4	8174444	1219.8	0.00138971
10068	IL18BP	7942300	625.465	0.00139037
23232	TBC1D12	7929424	469.003	0.00139554
148103	ZNF599	8036038	935.622	0.00139625
767564	SNORD113-4	7976812	309.514	0.00139654
649446	FLJ35776	8019954	377.743	0.00139795
57621	ZBTB2	8130185	352.508	0.00140291
8342	HIST1H2BM	8117594	26.1629	0.00140426
29062	WDR91	8143070	464.625	0.00140506
84220	RGPD5	8054557	378.112	0.0014099
283314	LOC283314	7953622	631.015	0.00141176
138724	C9orf131	8160912	685.283	0.00141409
164	AP1G1	8002592	384.986	0.00142227
5007	OSBP	7948379	416.972	0.00142235
203414	CXorf24	8167163	537.482	0.00142318
400223	C14orf181	7979820	416.716	0.00142373
8462	KLF11	8040211	358.856	0.00142533
6256	RXRA	8159127	455.446	0.0014268
7768	ZNF225	8029385	483.668	0.00142904
130752	MDH1B	8058462	1598.51	0.00143131
92181	UBTD2	8115806	382.754	0.00143339
9895	TECPR2	7976976	502.348	0.00143477
222696	ZSCAN23	8124583	1341.18	0.00143752
285331	CCDC66	8080621	909.824	0.00144068
317671	RFESD	8106978	767.689	0.0014412
874	CBR3	8068413	318.087	0.0014415
100132341	KIAA0664P3	7995242	658.735	0.00144544
257415	FAM133B	8140942	332.3	0.0014462
22898	DENND3	8148476	402.281	0.00144621
26686	OR4E2	7973296	1188.92	0.00144648
83855	KLF16	8032365	325.011	0.00144922
5342	PLGLB2	8053602	880.495	0.00144997
5342	PLGLB2	8043367	880.495	0.00144997
55900	ZNF302	8027674	359.437	0.00145374
57695	USP37	8058940	578.967	0.00145627
390882	OR7G2	8033734	1336.63	0.00145854
9262	STK17B	8057887	282.887	0.0014588
80025	PANK2	8060722	467.582	0.00145887
9969	MED13	8017312	451.155	0.00146005
253461	ZBTB38	8083092	346.367	0.00146794
26115	TANC2	8009075	398.536	0.00146879
84792	C7orf70	8155332	366.953	0.00146952
7570	ZNF22	7927202	434.107	0.00146959
284349	ZNF283	8029321	383.129	0.00147125
400506	C16orf88	7999903	514.329	0.00147473
143188	LOC143188	7930533	960.592	0.00147613
388341	C17orf76	8013022	642.441	0.00147631
84527	ZNF559	8025478	571.984	0.00147655
57609	DIP2B	7955376	432.236	0.00148097
284415	VSTM1	8039109	1299.33	0.00148254
64785	GINS3	7996211	449.942	0.00148856
4926	NUMA1	7950086	423.832	0.00148876
658	BMPR1B	8096511	1881.88	0.00149377
441046	LOC441046	8097626	593.788	0.00149384
8621	CDK13	8132417	344	0.00149467
6297	SALL2	7977761	782.773	0.00149794
23049	SMG1	7999841	522.962	0.0014991
29851	ICOS	8047702	1458.76	0.00149981
84923	FAM104A	8018097	373.814	0.00150218
57787	MARK4	8029642	325.916	0.00150317
23140	ZZEF1	8011542	483.603	0.00150347
140838	NANP	8065510	371.45	0.00150455
8110	DPF3	7979963	814.078	0.00150512
374899	ZNF829	8036365	662.363	0.00150953
4829	NMBR	8129947	1608.2	0.00150997
[truncated: 6,240 more rows]

## Sheet: Half-lives in iPS cells
Dataset 1B: Half-lives of mRNAs in iPS cells (min)
Gene_id	Gene_sym	Transcript_id	Half-Life	P-value
259290	TAS2R31	7961291	355.78	1.11118e-07
9299	SNORD30	7948900	81.9704	1.57888e-07
100128298	OCR1	7908861	448.134	3.4813e-07
654320	SNORA8	7951034	198.017	4.39875e-07
90809	TMEM55B	7977584	230.132	4.43331e-07
692198	SNORD78	7922408	52.0785	4.8308e-07
10181	RBM5	8079869	218.934	6.27517e-07
11214	AKAP13	7985695	277.577	6.29143e-07
80039	FAM106A	8005687	239.947	6.39959e-07
55783	FTSJD1	8002523	547.491	6.87791e-07
26796	SNORD53	8041168	145.762	7.50266e-07
6125	RPL5	7903010	196.222	9.7633e-07
197407	ZNF48	7994813	240.319	1.10921e-06
55030	FBXO34	7974473	193.741	1.23251e-06
54206	ERRFI1	7912157	187.163	1.27154e-06
2974	GUCY1B2	7971671	532.878	1.44646e-06
199692	ZNF627	8025927	391.064	1.51657e-06
574506	MIR503	8175261	143.747	1.61322e-06
26806	SNORD44	7922410	73.0863	1.6624e-06
7170	TPM3	7920472	533.176	1.68356e-06
100129396	FAM106C	8005231	247.616	1.68804e-06
84792	C7orf70	8155332	239.766	1.76164e-06
84851	TRIM52	8110666	146.076	1.84515e-06
151903	CCDC12	8086698	203.88	1.87433e-06
222235	FBXL13	8141846	953.272	1.88792e-06
6430	SFRS5	7975368	165.279	2.05979e-06
401105	FLJ42393	8084739	607.848	2.14896e-06
7006	TEC	8100231	395.696	2.15377e-06
406888	MIRLET7F1	8156521	267.023	2.17014e-06
25961	NUDT13	7934299	239.274	2.20359e-06
51747	LUC7L3	8008493	142.967	2.25257e-06
84285	EIF1AD	7949545	269.973	2.4683e-06
85028	SNHG12	7914202	135.358	2.54234e-06
54541	DDIT4	7928308	281.179	2.67623e-06
54617	INO80	7987584	161.318	2.70545e-06
259295	TAS2R20	7961285	332.931	2.71454e-06
93323	HAUS8	8035236	199.115	2.76049e-06
406890	MIRLET7G	8087881	552.476	2.81481e-06
7862	BRPF1	8077595	251.241	2.90746e-06
2844	GPR21	8157727	302.761	3.06298e-06
80039	FAM106A	8013268	250.699	3.16489e-06
3764	KCNJ8	7961702	309.827	3.20775e-06
692234	SNORD103A	7914324	400.253	3.51792e-06
692234	SNORD103A	7914322	400.253	3.51792e-06
374786	EFCAB5	8006085	701.834	3.61118e-06
7579	ZSCAN20	7899884	684.979	3.67906e-06
83874	TBC1D10A	8075332	307.12	3.74528e-06
79904	FLJ11710	8008700	383.142	3.91897e-06
7465	WEE1	7938366	163.79	4.29493e-06
26814	SNORD36B	8159006	190.161	4.3834e-06
1848	DUSP6	7965335	110.992	4.44798e-06
56478	EIF4ENIF1	8075507	295.336	4.59414e-06
100129112	LOC100129112	8017344	191.431	4.67288e-06
7728	ZNF175	8030831	328.824	4.86484e-06
6749	SSRP1	7948211	362.737	4.98184e-06
196472	FAM71C	7957790	1059.81	5.17286e-06
55692	LUC7L	7998174	192.867	5.24047e-06
54101	RIPK4	8070489	193.023	5.34216e-06
677849	SNORD1B	8010080	633.007	5.41048e-06
115004	C6orf150	8127534	786.786	5.54973e-06
619498	SNORD74	7922418	197	5.6148e-06
8987	STBD1	8095826	751.708	5.79049e-06
54510	PCDH18	8102792	202.375	5.8683e-06
121642	ALKBH2	7966183	286.911	5.87315e-06
84976	DISP1	7909954	369.48	5.8803e-06
259294	TAS2R19	7961287	457.852	5.94099e-06
6004	RGS16	7922717	162.646	5.98559e-06
80314	EPC1	7932938	178.574	6.14314e-06
171023	ASXL1	8061725	206.358	6.17793e-06
9758	FRMPD4	8166028	885.266	6.21277e-06
9836	LCMT2	7988077	213.372	6.2219e-06
4899	NRF1	8136140	290.493	6.4929e-06
259296	TAS2R50	7961281	574.01	6.5041e-06
79780	CCDC82	7951157	358.834	6.55932e-06
407006	MIR221	8172266	312.102	6.58384e-06
60673	C12orf44	7955606	245.64	6.66122e-06
23119	HIC2	8071536	221.032	6.73993e-06
27079	RPUSD2	7982753	272.143	7.03516e-06
80094	FLJ14107	8149718	817.835	7.20512e-06
4792	NFKBIA	7978644	80.0854	7.24374e-06
4084	MXD1	8042503	280.723	7.3098e-06
7994	MYST3	8150491	211.031	7.37571e-06
9293	GPR52	7907531	460.404	7.48367e-06
112869	CCDC101	7994362	225.585	7.51844e-06
26797	SNORD52	8118322	128.339	7.53349e-06
144165	PRICKLE1	7962375	268.46	7.5914e-06
692197	SNORD77	7922412	287.379	7.60008e-06
54455	FBXO42	7912750	213.256	7.6012e-06
574040	SNORA6	8078916	341.439	7.61716e-06
9860	LRIG2	7904086	253.054	7.73462e-06
114130	MGC16384	7967636	171.196	7.96381e-06
51447	IP6K2	8087201	282.515	8.15324e-06
9304	SNORD22	7948896	164.096	8.1711e-06
8493	PPM1D	8008922	173.107	8.27544e-06
116937	SNORD83A	8076221	244.212	8.31101e-06
339479	FAM5C	7922994	376.428	8.38865e-06
58486	ZBED5	7946635	235.162	8.48446e-06
54936	ADPRHL2	7900087	243.057	8.57048e-06
26765	SNORD12C	8063345	260.682	8.60667e-06
50838	TAS2R13	7961275	380.262	8.64817e-06
23179	RGL1	7908125	286.873	8.65175e-06
349196	LOC349196	8144418	228.242	8.87924e-06
349196	LOC349196	8144490	228.242	8.87924e-06
349196	LOC349196	8144416	228.242	8.87924e-06
349196	LOC349196	8144492	228.242	8.87924e-06
57665	RDH14	8050474	284.044	9.02053e-06
55290	BRF2	8150219	241.576	9.21357e-06
692195	SNORD75	7922416	130.746	9.30409e-06
2353	FOS	7975779	125.895	9.39313e-06
29923	C7orf68	8135915	323.44	9.43092e-06
90627	STARD13	7970924	482.981	9.47637e-06
55552	ZNF823	8034315	404.534	9.87645e-06
3337	DNAJB1	8034837	216.233	9.89764e-06
26959	HBP1	8135392	252.318	9.92918e-06
692090	SNORD59B	7964246	157.782	1.00755e-05
388796	LOC388796	8066254	40.403	1.11095e-05
25805	BAMBI	7926875	85.3379	1.12037e-05
1195	CLK1	8058127	178.623	1.12495e-05
51339	DACT1	7974689	335.444	1.14573e-05
3949	LDLR	8025828	120.555	1.15452e-05
146434	ZNF597	7998978	550.731	1.16831e-05
81698	C15orf5	7990636	541.341	1.16911e-05
54407	SLC38A2	7962537	170.217	1.17622e-05
9807	IP6K1	8087473	213.85	1.18373e-05
9745	ZNF536	8027431	583.901	1.21156e-05
7764	ZNF217	8067113	224.688	1.22062e-05
55478	PRO2012	7924817	123.609	1.27189e-05
8772	FADD	7942168	202.391	1.30491e-05
64858	DCLRE1B	7904131	188.647	1.3283e-05
3670	ISL1	8105220	252.907	1.34469e-05
286343	C9orf150	8154381	252.078	1.34741e-05
79728	PALB2	8000329	276.02	1.35727e-05
9778	KIAA0232	8093961	202.222	1.37086e-05
7403	KDM6A	8166956	229.048	1.37509e-05
7465	WEE1	7938364	283.274	1.37702e-05
93474	ZNF670	7925672	304.162	1.41647e-05
7553	ZNF7	8148941	235.763	1.43143e-05
81399	OR4F16	8110672	723.749	1.43683e-05
81399	OR4F16	7896744	723.749	1.43683e-05
81399	OR4F16	7911345	723.749	1.43683e-05
81061	OR11H1	7977472	505.107	1.46604e-05
81932	HDHD3	8163505	267.162	1.48139e-05
22943	DKK1	7927631	245.197	1.52196e-05
7716	VEZF1	8016891	321.826	1.5467e-05
10765	KDM5B	7923453	286.531	1.5934e-05
100129318	LOC100129318	7992996	495.378	1.6075e-05
148479	PHF13	7897322	172.429	1.60944e-05
197320	ZNF778	7997896	289.506	1.61353e-05
140460	ASB7	7986433	261.208	1.62056e-05
10804	GJB6	7970448	637.756	1.66373e-05
84975	MFSD5	7955729	224.016	1.74256e-05
144577	C12orf66	7964677	847.041	1.74865e-05
57396	CLK4	8116245	296.635	1.78618e-05
23228	PLCL2	8078187	299.606	1.80117e-05
51003	MED31	8011968	181.947	1.83508e-05
349196	LOC349196	8144410	219.579	1.84783e-05
55096	FLJ10213	8080980	377.897	1.87018e-05
26800	SNORD49A	8005202	122.314	1.88193e-05
1859	DYRK1A	8068551	164.76	1.88588e-05
55795	PCID2	7972888	148.688	1.89451e-05
3280	HES1	8084880	169.028	1.90601e-05
441308	OR4F21	8148962	764.719	1.92989e-05
11011	TLK2	8009014	181.055	1.93536e-05
80262	C16orf70	7996403	142.832	1.94154e-05
4092	SMAD7	8023220	347.742	1.97048e-05
79637	ARMC7	8009755	291.765	1.97951e-05
6627	SNRPA1	7991598	105.901	1.99267e-05
7592	ZNF41	8172307	514.618	2.01379e-05
388796	LOC388796	8066247	241.551	2.04799e-05
64783	RBM15	7903878	252.513	2.05307e-05
83935	TMEM133	7943369	318.347	2.06569e-05
8204	NRIP1	8069553	201.739	2.07325e-05
1768	DNAH6	8043059	1191.53	2.08586e-05
11138	TBC1D8	8054308	338.857	2.11814e-05
100124537	SNORA70B	8052524	415.254	2.12436e-05
7738	ZNF184	8124502	339.092	2.16799e-05
219432	OR4C6	7939932	1040.18	2.17641e-05
3399	ID3	7913655	174.883	2.20274e-05
144110	TMEM86A	7938812	540.061	2.20711e-05
54784	ALKBH4	8141757	422.393	2.22877e-05
729096	BMS1P4	7927550	425.693	2.28094e-05
117143	TADA1	7922008	266.421	2.3169e-05
57169	ZNFX1	8066905	349.13	2.31775e-05
161003	STOML3	7971126	942.257	2.33342e-05
2043	EPHA4	8059279	194.476	2.33656e-05
3833	KIFC1	8179564	314.798	2.36695e-05
1974	EIF4A2	8084704	190.427	2.37751e-05
442186	OR2J3	8179003	683.315	2.4092e-05
442186	OR2J3	8177694	683.315	2.4092e-05
349196	LOC349196	8144494	231.489	2.41355e-05
349196	LOC349196	8144420	231.489	2.41355e-05
100130733	LRRC70	8105579	754.149	2.42518e-05
55638	SYBU	8152355	499.772	2.46824e-05
5980	REV3L	8128894	226.08	2.51326e-05
641451	SNORA19	7936637	369.365	2.59622e-05
100133299	LOC100133299	8104568	488.67	2.59723e-05
6943	TCF21	8122176	268.461	2.67276e-05
54487	DGCR8	8071314	230.539	2.68497e-05
55051	C14orf102	7980702	327.954	2.68637e-05
3621	ING1	7970096	375.636	2.69896e-05
1131	CHRM3	7910915	373.175	2.7216e-05
81610	FAM83D	8062571	206.893	2.72467e-05
29909	GPR171	8091503	769.479	2.73293e-05
139105	BEND2	8171545	1708.04	2.75175e-05
7543	ZFX	8166500	280.522	2.79531e-05
606553	C8orf49	8144656	555.559	2.81408e-05
7022	TFAP2C	8063536	204.206	2.84375e-05
10957	PNRC1	8121076	193.65	2.86438e-05
10432	RBM14	7941702	248.43	2.87466e-05
1745	DLX1	8046373	314.782	2.89155e-05
23150	FRMD4B	8088745	329.227	2.93271e-05
79165	LENG1	8039139	378.384	2.95946e-05
84159	ARID5B	7927732	131.485	2.9759e-05
692075	SNORD6	7951030	420.708	3.00585e-05
10432	RBM14	7941707	210.608	3.04462e-05
26497	OR10D3P	7944827	1344.29	3.04773e-05
100133130	LOC100133130	7933572	442.199	3.0522e-05
100133130	LOC100133130	7933261	442.199	3.0522e-05
221400	TDRD6	8120082	865.457	3.08215e-05
10127	ZNF263	7992870	318.43	3.11225e-05
25925	ZNF521	8022612	306.12	3.12195e-05
1945	EFNA4	7905909	223.062	3.12905e-05
55794	DDX28	8002211	352.071	3.13201e-05
378465	HSN2	7952986	225.945	3.13263e-05
55904	MLL5	8135277	297.154	3.17823e-05
26779	SNORA69	8174715	439.959	3.20022e-05
26212	OR2B6	8117622	218.649	3.20569e-05
84612	PARD6B	8063410	196.242	3.22251e-05
55901	THSD1	7971813	411.283	3.22389e-05
51545	ZNF581	8031522	252.553	3.2287e-05
677771	SCARNA4	7920875	398.604	3.26222e-05
8313	AXIN2	8017718	344.211	3.26225e-05
51193	ZNF639	8084035	378.226	3.28451e-05
91752	ZNF804A	8046815	245.667	3.29666e-05
1318	SLC31A2	8157264	558.447	3.31247e-05
81577	GFOD2	8002082	660.117	3.31606e-05
6046	BRD2	8179504	193.193	3.37353e-05
57827	C6orf47	8178552	426.347	3.37812e-05
57827	C6orf47	8179808	426.347	3.37812e-05
222546	RFX6	8121649	1804.71	3.39107e-05
349196	LOC349196	8144414	203.959	3.39718e-05
349196	LOC349196	8144412	203.959	3.39718e-05
120776	OR2D2	7946286	664.148	3.41555e-05
84879	MFSD2A	7900365	224.826	3.4242e-05
6520	SLC3A2	7940717	228.4	3.4372e-05
211	ALAS1	8080184	174.01	3.43853e-05
90381	C15orf42	7985873	153.543	3.45592e-05
29116	MYLIP	8117020	309.944	3.4964e-05
116225	ZMYND19	8165622	270.283	3.51754e-05
349196	LOC349196	8149153	225.167	3.52386e-05
349196	LOC349196	8149157	225.167	3.52386e-05
55665	URGCP	8139256	261.791	3.52414e-05
7549	ZNF2	8043512	640.107	3.54582e-05
127602	DNAH14	7910047	304.566	3.57133e-05
112399	EGLN3	7978544	346.579	3.58529e-05
3097	HIVEP2	8129953	259.698	3.58586e-05
23082	PPRC1	7929990	110.398	3.58673e-05
8645	KCNK5	8126153	189.851	3.62395e-05
594839	SNORA33	8122144	487.36	3.64151e-05
57162	PELI1	8052654	237.197	3.69922e-05
79594	MUL1	7913242	282.866	3.75173e-05
54934	C12orf41	7962811	253.448	3.77717e-05
8708	B3GALT1	8046078	366.399	3.80785e-05
9969	MED13	8017312	268.483	3.83004e-05
55727	BTBD7	7980998	291.751	3.89837e-05
22863	KIAA0831	7979328	303.512	3.92335e-05
50628	GEMIN4	8010946	297.475	3.98081e-05
50650	ARHGEF3	8088247	343.486	4.00417e-05
54764	ZRANB1	7931226	292.599	4.01872e-05
5077	PAX3	8059301	264.391	4.05355e-05
257044	C1orf101	7911056	686.302	4.07763e-05
84503	ZNF527	8028241	696.677	4.15669e-05
407017	MIR26B	8048317	1160.53	4.15919e-05
868	CBLB	8089261	356.57	4.16348e-05
677835	SNORA56	8170992	238.406	4.26263e-05
79987	SVEP1	8163202	643.094	4.26723e-05
5387	PMS2L3	8140311	196.551	4.27287e-05
349196	LOC349196	8149222	212.609	4.29424e-05
349196	LOC349196	8149226	212.609	4.29424e-05
349196	LOC349196	8149218	212.609	4.29424e-05
349196	LOC349196	8149220	212.609	4.29424e-05
349196	LOC349196	8149224	212.609	4.29424e-05
1948	EFNB2	7972713	241.062	4.30603e-05
3833	KIFC1	8118669	304.252	4.32486e-05
79094	CHAC1	7982868	274.467	4.33728e-05
25888	ZNF473	8030569	320.277	4.37667e-05
692233	SNORD117	8124940	352.721	4.38352e-05
442186	OR2J3	8117714	685.186	4.47359e-05
26804	SNORD45B	7902400	165.034	4.4893e-05
9841	ZBTB24	8128767	305.862	4.49511e-05
9798	KIAA0174	7997168	271.139	4.49766e-05
121268	RHEBL1	7963009	354.397	4.52469e-05
286076	BREA2	8148671	470.657	4.54219e-05
6431	SFRS6	8062695	300.979	4.56213e-05
25897	RNF19A	8152041	214.006	4.61217e-05
2861	GPR37	8142687	388.289	4.64834e-05
57827	C6orf47	8124994	409.23	4.6918e-05
84837	C14orf128	7978538	606.696	4.73944e-05
9242	MSC	8151334	592.79	4.74902e-05
619571	SNORD96A	8116530	186.498	4.81389e-05
677811	SNORA28	7977075	281.904	4.83748e-05
84132	USP42	8131387	164.845	4.86794e-05
8701	DNAH11	8131719	897.624	4.96725e-05
84281	C2orf88	8047062	407.049	4.96997e-05
694	BTG1	7965423	193.897	4.97791e-05
1843	DUSP1	8115831	84.108	4.99e-05
10664	CTCF	7996593	258.34	4.99014e-05
84889	SLC7A3	8173414	1407.84	5.00303e-05
60386	SLC25A19	8018352	464.054	5.01159e-05
57507	ZNF608	8113761	241.162	5.10746e-05
677812	SNORA29	8130580	381.524	5.13873e-05
23143	LRCH1	7968976	378.895	5.13956e-05
221955	DAGLB	8138091	280.528	5.14439e-05
100132948	FAM27C	8155497	202.478	5.15093e-05
440689	HIST2H2BF	7919584	243.686	5.19371e-05
55659	ZNF416	8039664	601.876	5.19411e-05
594837	SNORD101	8122142	211.863	5.22103e-05
126295	ZNF57	8024532	318.762	5.22908e-05
645524	FLJ36840	8144228	262.86	5.23025e-05
25976	TIPARP	8083569	276.907	5.25535e-05
7554	ZNF8	8031893	284.324	5.27191e-05
114899	C1QTNF3	8111443	530.396	5.31604e-05
4839	NOP2	7960575	310.611	5.33305e-05
64320	RNF25	8058985	268.612	5.38758e-05
8552	INE1	8167099	185.898	5.44288e-05
7727	ZNF174	7992897	342.274	5.5409e-05
221442	LOC221442	8119423	246.208	5.54257e-05
100128868	LOC100128868	8135585	492.635	5.57977e-05
25880	TMEM186	7999317	287.089	5.58768e-05
133957	CCDC127	8110678	303.828	5.60235e-05
57617	VPS18	7982845	215.708	5.63853e-05
10116	FEM1B	7984470	181.768	5.65378e-05
11067	C10orf10	7933204	64.1434	5.70628e-05
85391	SNORD14E	7952335	296.351	5.70789e-05
27443	CECR2	8071086	223.339	5.71413e-05
7733	ZNF180	8037474	428.781	5.7265e-05
415116	PIM3	8073960	136.99	5.72763e-05
5992	RFX4	7958305	1472.1	5.73049e-05
23613	ZMYND8	8066786	250.901	5.75546e-05
1263	PLK3	7901054	333.567	5.7701e-05
27304	MOCS3	8063427	351.081	5.84666e-05
548321	FAM27A	8161503	213.029	5.8519e-05
548321	FAM27A	8155510	213.029	5.8519e-05
55272	IMP3	7990540	171.434	5.8784e-05
10580	SORBS1	7935188	585.725	5.90964e-05
283970	PDXDC2	8002322	260.276	5.97857e-05
2909	GRLF1	8029856	204.81	5.98417e-05
349196	LOC349196	8149210	229.967	5.98969e-05
349196	LOC349196	8149161	229.967	5.98969e-05
10407	SPAG11B	8149180	1684.13	6.00221e-05
10154	PLXNC1	7957570	674.674	6.05401e-05
79156	PLEKHF1	8027398	301.819	6.07466e-05
4097	MAFG	8019796	151.781	6.13093e-05
115352	FCRL3	7921275	804.755	6.15067e-05
84186	ZCCHC7	8155234	397.744	6.21173e-05
57569	ARHGAP20	7951565	456.17	6.24954e-05
56662	VTRNA1-3	8108631	443.54	6.25774e-05
407975	MIR17HG	7969576	138.942	6.2621e-05
127544	RNF19B	7914603	270.102	6.26692e-05
92806	CENPBD1	8003553	597.899	6.34755e-05
899	CCNF	7992594	178.373	6.36052e-05
22889	KIAA0907	7920852	299.584	6.36723e-05
692226	SNORD96B	8174507	650.871	6.37443e-05
79364	ZXDC	8090364	567.709	6.38148e-05
64782	AEN	7985767	226.075	6.41659e-05
8366	HIST1H4B	8124385	277.155	6.41883e-05
79660	PPP1R3B	8149264	420.777	6.43626e-05
9020	MAP3K14	8016194	335.238	6.46982e-05
100131534	BPA-1	7902072	841.079	6.49695e-05
10865	ARID5A	8043621	335.249	6.55595e-05
113510	HELQ	8101467	427.097	6.64698e-05
54807	ZNF586	8031821	429.357	6.67599e-05
54663	WDR74	7948881	258.591	6.7388e-05
25841	ABTB2	7947462	257.641	6.81613e-05
79891	ZNF671	8039680	687.386	6.85499e-05
205327	C2orf69	8047262	306.312	6.88379e-05
407014	MIR25	8141419	429.253	6.89579e-05
112970	KTI12	7916130	139.245	6.91118e-05
57693	ZNF317	8025458	195.834	6.94683e-05
54894	RNF43	8016994	430.236	6.9559e-05
100132686	LOC100132686	7943890	762.699	6.99754e-05
55090	MED9	8005260	230.14	7.06624e-05
404734	ANKHD1-EIF4EBP3	8108510	278.911	7.06788e-05
4795	NFKBIL1	8177967	481.302	7.08219e-05
4795	NFKBIL1	8179249	481.302	7.08219e-05
4795	NFKBIL1	8118127	481.302	7.08219e-05
2567	GABRG3	7982117	623.884	7.13861e-05
81566	CSRNP2	7963235	231.609	7.21322e-05
23462	HEY1	8151457	197.282	7.21331e-05
57680	CHD8	7977693	343.839	7.24107e-05
5926	ARID4A	7974621	465.072	7.244e-05
8798	DYRK4	7953229	343.312	7.24955e-05
23049	SMG1	8000167	212.375	7.28323e-05
1490	CTGF	8129562	207.923	7.32992e-05
25909	AHCTF1	8056220	322.937	7.44622e-05
285097	FLJ38379	8049957	431.373	7.48301e-05
5342	PLGLB2	8053602	685.843	7.50838e-05
5342	PLGLB2	8043367	685.843	7.50838e-05
623	BDKRB1	7976567	488.848	7.5173e-05
100129710	MST131	8145766	694.308	7.54768e-05
55693	KDM4D	7943282	368.895	7.63048e-05
644815	FAM83G	8013312	257.73	7.7062e-05
3660	IRF2	8103911	238.209	7.70937e-05
53944	CSNK1G1	7989657	259.232	7.77086e-05
5930	RBBP6	7994161	200.286	7.85428e-05
406962	MIR186	7916984	698.643	7.86793e-05
3491	CYR61	7902687	187.009	7.87344e-05
4794	NFKBIE	8126666	398.939	7.91637e-05
9298	SNORD31	7948898	149.607	7.97215e-05
23411	SIRT1	7927814	321.126	8.0209e-05
349196	LOC349196	8149216	182.528	8.05319e-05
5989	RFX1	8034722	284.399	8.05881e-05
64412	GZF1	8061373	420.506	8.10639e-05
100131997	FAM27E3	8161446	250.617	8.2632e-05
85461	TANC1	8045889	358.085	8.30079e-05
54812	AFTPH	8042291	257.685	8.30146e-05
402483	FLJ45340	8135931	239.897	8.32177e-05
9589	WTAP	8123129	338.354	8.32686e-05
83667	SESN2	7899436	312.134	8.33599e-05
728855	LOC728855	7919394	442.275	8.34186e-05
55259	CASC1	7961844	1336.68	8.3464e-05
9297	SNORD29	7948902	134.005	8.34796e-05
60370	AVPI1	7935521	240.886	8.35185e-05
196913	C14orf183	7978917	552.242	8.43241e-05
7113	TMPRSS2	8070467	1377.27	8.49248e-05
80129	C6orf97	8122827	913.352	8.5266e-05
10818	FRS2	7957043	310.224	8.53396e-05
23049	SMG1	8000222	241.339	8.55721e-05
23049	SMG1	7993999	241.339	8.55721e-05
10637	LEFTY1	7924663	610.651	8.58303e-05
6657	SOX2	8084165	142.37	8.58593e-05
54880	BCOR	8172088	156.894	8.60211e-05
3225	HOXC9	7955865	437.282	8.66524e-05
729975	FLJ30403	8030838	628.438	8.70621e-05
2742	GLRA2	8166127	547.668	8.78627e-05
219970	GLYATL2	7948354	1384.54	8.78957e-05
254170	FBXO33	7978748	292.459	8.84948e-05
23033	DOPEY1	8120883	504.967	8.86186e-05
8744	TNFSF9	8025053	278.708	8.86984e-05
146760	RTN4RL1	8011214	503.869	8.9255e-05
84640	USP38	8097570	251.99	8.92565e-05
84172	POLR1B	8044473	241.654	9.09697e-05
26821	SNORA74A	8108420	493.93	9.15289e-05
83478	ARHGAP24	8096160	1284.14	9.17433e-05
64768	IPPK	8162421	372.718	9.17809e-05
90	ACVR1	8056005	520.92	9.24294e-05
23394	ADNP	8067011	199.035	9.35274e-05
22914	KLRK1	7961151	1159.29	9.37757e-05
8676	STX11	8122457	469.057	9.39027e-05
9306	SOCS6	8021707	244.48	9.49233e-05
677798	SNORA9	8139456	144.928	9.52787e-05
158358	KIAA2026	8160011	195.467	9.52849e-05
692229	SNORD105	8025584	290.39	9.55792e-05
1027	CDKN1B	7954029	250.535	9.56153e-05
1039	CDR2	8000236	205.973	9.60019e-05
23036	ZNF292	8120992	281.094	9.60791e-05
90362	FAM110B	8146533	413.808	9.61758e-05
8626	TP63	8084766	716.801	9.62153e-05
83452	RAB33B	8097507	309.415	9.62531e-05
339559	ZNF642	7900446	436.351	9.6271e-05
1438	CSF2RA	8165735	495.201	9.7321e-05
1438	CSF2RA	8176306	495.201	9.7321e-05
7589	ZSCAN21	8134689	384.296	9.77549e-05
137868	SGCZ	8149438	762.37	9.78219e-05
57343	ZNF304	8031726	497.363	9.78723e-05
26271	FBXO5	8130374	146.861	9.80187e-05
10248	POP7	8134904	293.138	9.88177e-05
28951	TRIB2	8040365	275.527	9.91938e-05
79818	ZNF552	8039687	506.319	9.92414e-05
375133	PI4KAP2	8074748	239.836	9.96547e-05
9572	NR1D1	8014956	303.349	9.96925e-05
5015	OTX2	7979357	388.859	9.98076e-05
653808	ZG16	7994615	1021.71	0.000100319
284307	ZIK1	8031768	843.542	0.000100642
100287934	LOC100287934	7909990	232.143	0.000100807
54470	ARMCX6	8174086	358.339	0.000101092
84059	GPR98	8106827	539.75	0.000101721
7798	LUZP1	7913558	206.888	0.000102248
29072	SETD2	8086706	272.936	0.000102633
55924	C1orf183	7918552	455.26	0.000102982
1944	EFNA3	7905918	274.64	0.000102982
3034	HAL	7965606	671.277	0.000103493
23117	NPIPL3	8022320	120.657	0.000103743
653687	CXorf50B	8168391	501.663	0.000103911
58480	RHOU	7910387	166.417	0.000104309
9510	ADAMTS1	8069676	131.184	0.000104339
2020	EN2	8137537	199.163	0.0001047
5016	OVGP1	7918504	225.827	0.000106042
10392	NOD1	8138842	461.735	0.000106071
56257	MEPCE	8134821	244.818	0.000106422
144406	WDR66	7959330	711.322	0.000106821
6427	SFRS2	8018803	261.206	0.000107372
6046	BRD2	8118580	165.956	0.000107587
10221	TRIB1	8148304	115.726	0.000108647
79845	RNF122	8150186	147.394	0.000109854
26122	EPC2	8045619	261.945	0.000109998
90233	ZNF551	8031807	494.016	0.000111375
57476	GRAMD1B	7944769	281.587	0.00011149
79697	C14orf169	7975595	235.932	0.000111528
259292	TAS2R46	7961293	728.95	0.00011358
23360	FNBP4	7947969	229.845	0.000113868
100379132	SNORA70G	7964830	262.085	0.00011435
9374	PPT2	8179451	333.625	0.000114612
10407	SPAG11B	8144460	1329.21	0.00011539
5083	PAX9	7973974	189.938	0.00011555
440689	HIST2H2BF	7919606	248.272	0.000115626
30811	HUNK	8068180	349.817	0.000115749
100133280	LOC100133280	8112519	262.575	0.000116882
4929	NR4A2	8055952	327.143	0.000117109
23660	ZKSCAN5	8134621	451.376	0.000117244
136	ADORA2B	8005134	214.407	0.0001178
6082	SNORD20	8059710	568.587	0.000118682
10782	ZNF274	8031871	479.977	0.000118765
4297	MLL	7944223	280.973	0.000119019
403341	ZBTB34	8157941	255.189	0.000119707
7718	ZNF165	8117630	585.393	0.000120038
63906	GPATCH3	7913990	422.74	0.000120337
898	CCNE1	8027402	282.119	0.000120389
414059	TBC1D3B	8019655	286.242	0.000120758
81061	OR11H1	7972981	939.701	0.000121371
81061	OR11H1	8074194	939.701	0.000121371
26164	GTPBP5	8063857	264.595	0.000122682
344387	CDKL4	8051696	1378.46	0.000123361
80824	DUSP16	7961371	179.309	0.000123531
26057	ANKRD17	8100902	257.093	0.000123927
162963	ZNF610	8030914	831.279	0.000124274
7975	MAFK	8131091	421.436	0.000124659
9374	PPT2	8118509	353.483	0.000124964
8848	TSC22D1	7971350	263.434	0.000125135
80818	ZNF436	7913582	492.938	0.000125246
64097	EPB41L4A	8113512	772.364	0.000125557
677813	SNORA30	7994926	438.376	0.000125817
116039	OSR2	8147573	340.988	0.000125832
729603	LOC729603	8123230	297.447	0.000126473
374291	NDUFS7	8032212	237.374	0.000127014
374286	CDRT1	8012931	855.467	0.000128079
57458	TMCC3	7965510	615.032	0.000128107
55193	PBRM1	7967896	518.957	0.000128166
100132147	LOC100132147	7912802	483.349	0.000128388
100287934	LOC100287934	7896754	223.634	0.000128869
2131	EXT1	8152491	389.321	0.00012895
9693	RAPGEF2	8098121	234.08	0.000129329
9592	IER2	8026163	191.674	0.000130018
135656	DPCR1	8179221	746.386	0.000130254
4277	MICB	8177955	350.136	0.000131241
203414	CXorf24	8167163	501.049	0.000131283
79992	C6orf59	8130641	403.452	0.000131483
200734	SPRED2	8052689	146.324	0.000132212
29844	TFPT	8039131	415.985	0.000132243
51326	ARL17A	8007794	378.933	0.000132571
144132	DNHD1	7938133	295.499	0.000132761
7539	ZFP37	8163444	1068.32	0.000132825
7498	XDH	8051322	923.674	0.000132879
25988	HINFP	7944435	354.626	0.000133408
64651	CSRNP1	8086330	157.86	0.000133706
63943	FKBPL	8125316	368.379	0.000134514
63943	FKBPL	8178749	368.379	0.000134514
646600	C3orf65	8084627	809.981	0.00013474
9425	CDYL	8116710	316.212	0.00013476
54790	TET2	8096669	530.398	0.000135196
7286	TUFT1	7905428	355.644	0.00013521
677792	SNORA1	7951032	404.308	0.00013567
2841	GPR18	7972548	1020.93	0.00013578
374877	C19orf45	8025169	1060.29	0.000135859
677822	SNORA40	8045423	528.77	0.000136162
7204	TRIO	8104506	334.866	0.0001362
349196	LOC349196	8149165	263.725	0.000136499
349196	LOC349196	8149167	263.725	0.000136499
1947	EFNB1	8168045	474.109	0.000136627
375133	PI4KAP2	8074577	193.833	0.000136934
2534	FYN	8128956	259.468	0.000137098
3909	LAMA3	8020551	416.267	0.000137389
85315	PAQR8	8120215	313.315	0.000137884
9744	ACAP1	8004331	734.363	0.000138147
8614	STC2	8115851	401.675	0.000138969
406955	MIR181B1	7923173	1029.43	0.000139476
85025	TMEM60	8140500	205.864	0.0001397
9303	SNORD25	7948910	176.071	0.00014039
284058	KIAA1267	8016266	165.27	0.000140692
8944	SNORD73A	8097792	207.434	0.00014078
644975	FLJ30064	8134460	393.456	0.000140791
114821	SCAND3	8124594	459.283	0.000140843
390637	C15orf58	7985959	442.363	0.00014106
5013	OTX1	8042251	283.133	0.000141225
9754	STARD8	8168028	369.54	0.000141518
113115	FAM54A	8129763	225.553	0.000141693
84218	TBC1D3F	8014603	277.873	0.000141749
342945	ZSCAN22	8031908	439.213	0.000142484
79791	FBXO31	8003249	400.843	0.000142527
654341	TBC1D3G	8019716	283.659	0.000142649
2526	FUT4	7943236	340.721	0.000142897
7692	ZNF133	8061154	607.554	0.000143197
55922	NKRF	8174684	247.823	0.000143335
56475	RPRM	8055941	529.442	0.000143399
121227	LRIG3	7964602	251.274	0.000143687
4036	LRP2	8056611	306.352	0.000144088
25973	PARS2	7916422	463.341	0.00014459
81559	TRIM11	7924868	237.742	0.000145507
100129312	LOC100129312	8056810	959.61	0.000145748
6018	RLF	7900395	203.035	0.000145915
11236	RNF139	8148265	213.453	0.000145945
388692	LOC388692	7905043	615.5	0.000146059
100131766	OK/SW-CL.58	7970828	502.1	0.00014607
711	C3orf51	8088212	903.605	0.000146078
6263	RYR3	7982392	1105.17	0.000146434
1654	DDX3X	8166876	294.754	0.000146742
10253	SPRY2	7972217	121.173	0.000147732
9925	ZBTB5	8161224	362.214	0.000147849
8603	FAM193A	8093601	188.293	0.0001483
349196	LOC349196	8149214	287.331	0.000148311
349196	LOC349196	8149151	287.331	0.000148311
55295	KLHL26	8027049	352.093	0.000148339
4690	NCK1	8082911	303.493	0.000148962
8621	CDK13	8132417	263.677	0.000149459
100129785	LOC100129785	8158625	445.462	0.000151885
1942	EFNA1	7905929	290.126	0.000152223
4010	LMX1B	8157922	381.589	0.000153109
654502	IQCJ	8083673	843.929	0.000153808
5514	PPP1R10	8178358	147.432	0.00015458
5514	PPP1R10	8124756	147.432	0.00015458
5514	PPP1R10	8179664	147.432	0.00015458
143689	PIWIL4	7943240	778.011	0.000154647
133923	ZNF474	8107591	894.542	0.000154719
2946	GSTM2	7919578	319.091	0.000154829
259289	TAS2R43	7961295	611.657	0.000154836
26807	SNORD43	8076223	169.874	0.000155443
10602	CDC42EP3	8051573	300.613	0.000155844
677820	SNORA38	8118207	222.182	0.000156121
80124	VCPIP1	8151118	395.613	0.000156317
57460	PPM1H	7964646	427.724	0.000157174
114034	TOE1	7901091	507.607	0.000157384
11216	AKAP10	8013431	277.188	0.000157927
645520	FAM138A	8159803	1456.36	0.000158073
123879	DCUN1D3	8000028	291.162	0.00015866
126375	ZNF792	8036045	567.468	0.000158799
10978	CLP1	7940046	431.58	0.000159554
8726	EED	7942914	258.922	0.000159624
474170	LRRC37A2	8016259	321.541	0.000160801
2889	RAPGEF1	8164692	1025.65	0.000160905
6877	TAF5	7930213	279.957	0.00016092
729873	TBC1D3	8014633	267.73	0.000161783
100131997	FAM27E3	8155514	259.967	0.000162265
54665	RSBN1	7918681	246.011	0.000163612
9816	URB2	7910416	328.281	0.000164528
55094	GPATCH1	8027521	426.829	0.000164883
9451	EIF2AK3	8053668	282.084	0.000164968
23506	KIAA0240	8119582	333.372	0.00016564
3142	HLX	7909890	366.928	0.000166526
64794	DDX31	8164742	414.478	0.000166832
10557	RPP38	7926345	396.515	0.000166934
2210	FCGR1B	7919133	1323.81	0.000166991
391	RHOG	7945944	135.176	0.000167467
100127886	PRO0628	8066275	530.902	0.000167941
26776	SNORA71B	8066256	144.083	0.000168338
2897	GRIK1	8068120	630.593	0.000168438
729873	TBC1D3	8006746	267.108	0.000168536
100131997	FAM27E3	8161499	241.306	0.000168669
389856	USP27X	8167601	348.896	0.000169159
4215	MAP3K3	8009183	310.886	0.00016957
7270	TTF1	8164729	511.782	0.000170825
60436	TGIF2	8062319	275.365	0.000171488
8092	ALX1	7957452	269.516	0.000171837
2487	FRZB	8057506	588.668	0.000172148
57661	PHRF1	7937415	304.41	0.000172516
190	NR0B1	8171892	472.167	0.000172564
4882	NPR2	8155121	715.225	0.000173384
10891	PPARGC1A	8099633	479.369	0.000174126
9132	KCNQ4	7900492	598.226	0.000174144
8503	PIK3R3	7915787	247.707	0.000175157
144132	DNHD1	7938128	403.431	0.000175616
414059	TBC1D3B	8014376	277.696	0.000175746
26773	SNORD4A	8005953	344.635	0.000175887
113444	C1orf212	7914750	558.868	0.000176264
51027	BOLA1	7905092	488.406	0.000177621
10018	BCL2L11	8044375	260.514	0.000178063
3202	HOXA5	8138735	226.075	0.000178588
442578	STAG3L3	8139977	214.324	0.000178663
170689	ADAMTS15	7945232	821.416	0.000178997
55626	AMBRA1	7947652	351.361	0.00017916
401720	FIGNL2	7963328	505.628	0.000180041
6575	SLC20A2	8150537	290.658	0.000180749
643210	FLJ40292	8159732	383.144	0.000180802
653808	ZG16	8003578	768.925	0.000181104
9639	ARHGEF10	8144315	367.384	0.000182016
283518	KCNRG	7969166	311.658	0.000182887
8553	BHLHE40	8077441	156.277	0.000182938
51720	UIMC1	7911343	197.468	0.000183123
51720	UIMC1	8165703	197.468	0.000183123
8567	MADD	7939767	132.647	0.000183126
3224	HOXC8	7955869	339.391	0.000184966
100131943	LOC100131943	8005659	700.927	0.000185199
80895	ILKAP	8059969	360.261	0.000185674
182	JAG1	8064978	306.612	0.0001858
26809	SNORD42A	8005955	224.704	0.000185826
57688	ZSWIM6	8105506	162.788	0.000186539
729877	TBC1D3H	8014420	271.473	0.000186734
654341	TBC1D3G	8014437	271.473	0.000186734
27099	C7orf54	8135902	477.3	0.000187003
100134868	LOC100134868	8061483	479.987	0.000187067
2625	GATA3	7926105	219.488	0.000187443
388677	NOTCH2NL	7904702	289.845	0.000188151
751816	DSERG1	8154128	898.074	0.000188197
400798	C1orf220	7907649	730.496	0.000188688
56270	WDR45L	8019523	421.607	0.000188974
100128310	RP11-429E11.3	8067358	1148.85	0.00018942
26813	SNORD36C	8158998	240.336	0.000189438
10042	HMGXB4	8072645	238.656	0.0001895
283248	RCOR2	7949021	323.35	0.000190468
401024	FSIP2	8046824	1698.96	0.000191295
3767	KCNJ11	7946853	449.358	0.00019221
1901	S1PR1	7903393	462.567	0.00019381
283970	PDXDC2	7994559	197.142	0.000194743
100130428	LOC100130428	7952451	236.419	0.000195691
7186	TRAF2	8159476	489.705	0.000195935
8202	NCOA3	8063211	261.912	0.000196648
100128288	LOC100128288	8012464	434.138	0.000196842
54959	ODAM	8095456	1246.98	0.000197087
161725	OTUD7A	7982294	340.017	0.000197164
129790	C7orf13	8144082	343.481	0.000198135
55721	IQCC	7899727	548.589	0.000198493
51301	GCNT4	8112668	1102.69	0.000198922
50836	TAS2R8	7961243	897.255	0.000199591
5987	TRIM27	8179575	227.804	0.000199923
5987	TRIM27	8124610	227.804	0.000199923
390260	OR6X1	7952373	1329.49	0.000200113
6083	SNORD21	7903022	139.792	0.000200976
144203	OVOS2	7962139	448.326	0.000201359
6495	SIX1	7979505	213.383	0.000201719
1749	DLX5	8141140	274.911	0.000201918
374666	WASH3P	8031981	213.489	0.000201953
51244	C3orf19	8078033	359.027	0.000201955
6196	RPS6KA2	8130739	495.234	0.000202196
9895	TECPR2	7976976	419.715	0.000202382
7227	TRPS1	8152453	250.437	0.00020269
143872	ARHGAP42	7943349	377.14	0.000203043
379	ARL4D	8007493	346.891	0.000203715
10781	ZNF266	8033754	324.812	0.000204148
81839	VANGL1	7904211	352.519	0.00020423
374879	ZNF699	8033746	703.847	0.000204862
10078	TSSC4	7937813	286.987	0.000205097
285989	ZNF789	8134613	550.181	0.000206087
9698	PUM1	7914296	198.599	0.000206222
163071	ZNF114	8030002	96.6752	0.000206386
57154	SMURF1	8141241	262.318	0.000207048
23087	TRIM35	8149907	273.819	0.000207415
9302	SNORD26	7948908	150.425	0.00020757
7712	ZNF157	8167152	726.579	0.000208214
91056	DKFZp761E198	7949490	248.697	0.000208679
55182	RNF220	7900979	275.772	0.000208722
4926	NUMA1	7950086	425.51	0.000209276
170959	ZNF431	8027292	305.686	0.000209284
3717	JAK2	8154178	883.969	0.000211063
23345	SYNE1	8130211	1091.66	0.000211104
10184	LHFPL2	8112803	384.736	0.000213485
91526	ANKRD44	8057990	668.27	0.000213914
192669	EIF2C3	7900051	359.339	0.000213928
57553	MICAL3	8074286	346.232	0.000214339
64778	FNDC3B	8083901	225.242	0.000214391
55178	RNMTL1	8003621	343.782	0.000214944
57761	TRIB3	8060344	427.414	0.000215426
85464	SSH2	8013965	264.439	0.000215752
26226	FBXW4P1	8071713	303.394	0.000215758
54838	C10orf26	7930162	406.551	0.000216721
57591	MKL1	8076241	195.448	0.000217117
80176	SPSB1	7897449	247.353	0.000218413
135112	NCOA7	8121861	511.593	0.000218935
1106	CHD2	7986250	263.576	0.000220157
11221	DUSP10	7924450	401.265	0.00022139
390077	OR52N2	7938059	1407.51	0.000222744
55596	ZCCHC8	7967287	283.012	0.00022393
8846	ALKBH1	7980454	239.848	0.000224465
57547	ZNF624	8013035	405.852	0.000224646
6491	STIL	7915926	335.358	0.00022556
100133280	LOC100133280	8105987	274.754	0.000225692
339883	C3orf35	8078605	516.705	0.000225851
139411	PTCHD1	8166447	528.811	0.000226205
53349	ZFYVE1	7979984	331.82	0.000226207
51111	SUV420H1	7949931	290.45	0.000226305
4739	NEDD9	8123936	725.902	0.000226898
79142	PHF23	8012099	179.542	0.000227555
10509	SEMA4B	7985934	381.256	0.000227916
677838	SNORA61	7914212	146.683	0.000229196
100302207	MIR1974	8165707	178.391	0.000229683
100302207	MIR1974	8113120	178.391	0.000229683
284370	ZNF615	8038925	681.315	0.000229744
55171	TBCCD1	8092627	507.86	0.00022976
3708	ITPR1	8077376	466.283	0.000231259
11069	RAPGEF4	8046428	516.538	0.000231289
22822	PHLDA1	7965040	397.262	0.000232826
55254	TMEM39A	8089759	247.637	0.000233857
285335	SLC9A10	8089489	1787.67	0.000234046
6433	SFRS8	7959927	350.313	0.000234476
57649	PHF12	8013812	78.5764	0.000235659
23049	SMG1	8000651	342.651	0.00023569
58491	ZNF71	8031675	403.574	0.000237747
22866	CNKSR2	8166355	897.579	0.000238076
1795	DOCK3	8080028	359.339	0.000238169
4170	MCL1	7919751	241.371	0.000238434
10766	TOB2	8076331	113.036	0.000239421
9681	DEPDC5	8072529	562.325	0.000239768
677834	SNORA55	7915227	362.296	0.000240695
859	CAV3	8077503	713.728	0.000240972
1871	E2F3	8117128	264.397	0.000241933
54861	SNRK	8079140	290.83	0.000241942
57396	CLK4	8116227	286.879	0.000243798
162989	DEDD2	8037144	242.427	0.00024381
79693	YRDC	7915084	323.551	0.000243853
287015	TRIM42	8083053	1323.77	0.000244999
50840	TAS2R14	7961279	403.105	0.00024576
285172	FAM126B	8058182	264.89	0.000246935
7608	ZNF56	8027239	936.601	0.000247441
55582	KIF27	8162019	443.297	0.000247769
403313	PPAPDC2	8154151	476.164	0.000247812
154807	VKORC1L1	8133119	602.256	0.000247894
3096	HIVEP1	8116910	202.681	0.000248364
54453	RIN2	8061247	612.158	0.000251371
4907	NT5E	8120967	818.472	0.000252386
8480	RAE1	8063566	326.035	0.000253035
26276	VPS33B	7991427	552.514	0.000253172
283970	PDXDC2	7997239	207.303	0.000253285
1768	DNAH6	8043055	964.498	0.000253651
100379141	SNORA70D	8002590	502.287	0.000253906
406971	MIR195	8012004	748.881	0.000254189
144233	BCDIN3D	7963139	502.126	0.000254937
23261	CAMTA1	7897339	349.727	0.000255071
407019	MIR27B	8156571	461.956	0.000255189
440362	HERC2P4	8001067	205.932	0.00025696
22911	WDR47	7918275	225.86	0.000257008
57168	ASPHD2	8072108	527.979	0.000257546
91574	C12orf65	7959563	269.237	0.000257601
54531	MIER2	8032009	271.402	0.00025781
84283	TMEM79	7906146	572.79	0.000257914
3047	HBG1	7946048	1212.25	0.000258311
3047	HBG1	7946054	1212.25	0.000258311
1326	MAP3K8	7926900	503.602	0.000258369
129049	SGSM1	8071953	338.742	0.000258819
100130876	LOC100130876	8010978	164.815	0.000259015
8924	HERC2	7986863	507.063	0.000260461
55809	TRERF1	8126428	303.395	0.000261552
79733	E2F8	7947110	250.425	0.000261676
283970	PDXDC2	8000501	190.879	0.000261955
27012	KCNV1	8152369	667.682	0.000262354
166793	ZBTB49	8093829	452.724	0.000263088
10717	AP4B1	7918703	566.674	0.0002637
23208	SYT11	7906061	354.916	0.000264665
5826	ABCD4	7980115	458.294	0.000266045
23328	SASH1	8122637	445.971	0.00026616
3012	HIST1H2AE	8117408	465.479	0.000267456
146923	RUNDC1	8007435	334.811	0.00026746
92935	MARS2	8047243	248.048	0.0002676
580	BARD1	8058695	386.096	0.000268276
65987	KCTD14	7950641	625.204	0.00026833
10472	ZNF238	7911038	484.592	0.000269595
57332	CBX8	8019010	333.56	0.000269802
22828	RBM16	8122909	370.336	0.000269922
23240	KIAA0922	8097867	226.654	0.0002705
9208	LRRFIP1	8049528	178.668	0.000271162
6526	SLC5A3	8068353	253.311	0.000271426
54790	TET2	8096675	208.201	0.00027206
55209	SETD5	8077528	225.798	0.000272116
79831	JMJD5	7994269	387.656	0.000272495
22865	SLITRK3	8091863	214.25	0.000272905
1579	CYP4A11	7915902	386.918	0.000272907
406949	MIR15B	8083737	1039.84	0.000273705
993	CDC25A	8086880	313.821	0.000274173
100131826	LOC100131826	8095868	745.573	0.000274967
4799	NFX1	8154793	308.892	0.000275447
23024	PDZRN3	8088848	244.657	0.000275512
337879	KRTAP8-1	8069863	750.685	0.000275976
130540	ALS2CR12	8058203	1053.89	0.0002773
100132147	LOC100132147	7898407	552.889	0.00027809
55647	RAB20	7972805	569.489	0.000278102
319139	SNORD56B	7975453	1331.62	0.000278616
54980	C2orf42	8052834	315.193	0.000279029
377630	USP17L2	8144395	233.241	0.000279042
80131	LRRC8E	8025347	369.396	0.000279114
144132	DNHD1	7938118	487.955	0.000279345
120534	C11orf46	7939087	429.974	0.00027955
2898	GRIK2	8121225	635.349	0.000279849
170850	KCNG3	8051785	353.823	0.00027998
23049	SMG1	8000834	255.686	0.000280803
55301	OLAH	7926334	924.819	0.000280871
10370	CITED2	8129937	244.922	0.000280895
51179	HAO2	7904396	500.851	0.000281139
56956	LHX9	7908529	718.033	0.000281173
54778	RNF111	7983953	231.254	0.000281655
57188	ADAMTSL3	7985522	882.193	0.000281865
5676	PSG7	8037251	679.15	0.000282451
80714	PBX4	8035694	699.748	0.000282754
81832	NETO1	8023828	2093.52	0.000284372
51585	PCF11	7942839	221.304	0.000284785
153020	RASGEF1B	8101304	553.918	0.00028491
10020	GNE	8161174	328.099	0.000285043
4783	NFIL3	8162276	238.841	0.000285234
57466	SFRS15	8069910	199.654	0.000285475
64582	GPR135	7979426	378.945	0.000285773
2124	EVI2B	8014063	790.524	0.000286375
342035	GLDN	7983704	734.549	0.000286504
84848	MGC16121	8175256	157.709	0.000286791
284391	ZNF844	8025984	1777.07	0.000287027
79940	C6orf155	8127502	325.456	0.000289433
2859	GPR35	8049722	631.983	0.000289462
85026	C9orf37	8165630	334.379	0.000289588
353322	ANKRD37	8098604	378.373	0.000289873
27163	NAAA	8101086	335.88	0.000289922
57700	FAM160B1	7930682	303.588	0.00029097
9766	KIAA0247	7975361	452.847	0.000291076
344838	PAQR9	8091255	586.883	0.000291374
8877	SPHK1	8010061	257.928	0.00029187
131601	TPRA1	8090420	378.074	0.000293471
57589	KIAA1432	8154254	445.972	0.000293973
653	BMP5	8127193	1150.76	0.000294202
4920	ROR2	8162283	401.642	0.000294311
8864	PER2	8059996	394.039	0.0002957
9322	TRIP10	8025058	238.599	0.000296197
60625	DHX35	8062576	386.222	0.000297392
90589	ZNF625	8034342	498.023	0.000298213
9278	ZBTB22	8178988	261.775	0.000298758
83875	BCO2	7943867	824.43	0.000299309
9314	KLF4	8163002	173.249	0.000299463
96459	FNIP1	8113914	364.738	0.000300428
79894	ZNF672	7911289	441.316	0.000300677
1950	EGF	8096845	965.317	0.0003011
6526	SLC5A3	8068361	215.428	0.000301201
2150	F2RL1	8106403	234.357	0.000301293
284309	ZNF776	8031815	344.953	0.000302557
4211	MEIS1	8042356	480.047	0.000303
639	PRDM1	8121257	805.841	0.000303973
3005	H1F0	8072926	294.642	0.00030599
8543	LMO4	7902810	236.432	0.000306013
1364	CLDN4	8133360	427.057	0.000306069
4097	MAFG	8019308	304.282	0.000308093
8535	CBX4	8019018	264.434	0.000309107
383	ARG1	8122058	1234.98	0.000311621
7465	WEE1	7938348	198.694	0.000311814
83449	PMFBP1	8002667	679.207	0.000311923
3347	HTN3	8095430	1904.55	0.00031226
5314	PKHD1	8126954	1630.7	0.000312301
51069	MRPL2	8126512	237.852	0.000312356
79774	GRTP1	7972890	393.376	0.000312898
64428	NARFL	7998336	542.463	0.000313293
55355	HJURP	8059838	346.262	0.000313733
9618	TRAF4	8005978	227.858	0.000314429
2735	GLI1	7956430	714.387	0.000317018
10420	TESK2	7915718	330.99	0.000317574
5883	RAD9A	7941865	387.91	0.000318844
63950	DMRTA2	7915991	328.619	0.000320124
84859	LRCH3	8085000	271.955	0.000320996
92610	TIFA	8102362	390.509	0.000322393
6044	SNORA62	8078918	155.522	0.000322623
22884	WDR37	7925851	379.297	0.000322919
283571	PROX2	7980213	555.365	0.000323663
7536	SF1	7949146	126.744	0.000323743
22882	ZHX2	8148149	246.454	0.000324622
2669	GEM	8151816	192.315	0.000325769
3229	HOXC13	7955845	167.122	0.000326329
2624	GATA2	8090469	169.092	0.000326612
63974	NEUROD6	8138882	1016.52	0.000326696
51531	C9orf156	8162706	646.36	0.000327672
283970	PDXDC2	8000537	200.056	0.000327737
23329	TBC1D30	7956826	401.983	0.000327741
22954	TRIM32	8157516	411.325	0.000327816
6419	SETMAR	8077370	465.326	0.000327826
5292	PIM1	8119161	287.541	0.000328323
6484	ST3GAL4	7945110	588.694	0.000328774
8897	MTMR3	8072279	295.506	0.000328898
283303	C11orf36	7937876	377.129	0.000329217
442132	LOC442132	8110916	171.001	0.000329992
157922	CAMSAP1	8165046	372.684	0.000330588
166336	PRICKLE2	8088550	548.714	0.000330722
83992	CTTNBP2	8142497	611.888	0.000331373
100033422	SNORD116-10	7981968	1741.66	0.000331734
23092	ARHGAP26	8108873	452.929	0.000332465
133482	SLCO6A1	8113385	762.768	0.000334054
85450	ITPRIP	7936242	205.307	0.000334174
23255	KIAA0802	8020037	434.623	0.000334207
149297	FAM78B	7922001	769.366	0.000334648
441476	C9orf173	8159646	569.898	0.00033608
5100	PCDH8	7971850	453.195	0.000336344
57701	NCKAP5L	7963134	495.572	0.000336718
5137	PDE1C	8138888	881.198	0.000337864
56977	STOX2	8098549	280.944	0.000338202
805	CALM2	8052010	214.659	0.000338403
157313	CDCA2	8145418	308.943	0.000338646
100132288	LOC100132288	8071044	230.529	0.000339234
146050	ZSCAN29	7988082	376.206	0.000340213
4992	OR1F1	7992863	325.147	0.000340673
55957	LIN37	8028004	253.768	0.000341801
84798	C19orf48	8038624	316.523	0.000341879
1936	EEF1D	8153457	287.868	0.000342173
7546	ZIC2	7969830	193.044	0.000342398
51271	UBAP1	8154872	226.014	0.000343407
8554	PIAS1	7984453	229.743	0.000343495
1847	DUSP5	7930413	218.262	0.000343534
126917	IFFO2	7912994	676.75	0.000343663
55082	ARGLU1	7972723	180.716	0.000343981
201163	FLCN	8013071	316.621	0.000344271
25819	CCRN4L	8097461	211.837	0.000345115
26145	IRF2BP1	8037723	260.459	0.000346537
55716	LMBR1L	7963024	364.205	0.000346794
100131792	LOC100131792	8107720	635.4	0.000348029
285704	RGMB	8107100	241.443	0.000349086
9441	MED26	8035187	245.954	0.000349367
7541	ZFP161	8022110	379.375	0.000349763
10435	CDC42EP2	7941236	178.851	0.0003502
164237	WFDC13	8063014	818.646	0.000350258
3720	JARID2	8116998	281.843	0.000351701
9252	RPS6KA5	7980744	357.966	0.000351881
23592	LEMD3	7956842	328.543	0.000351987
387849	REP15	7954589	1034.64	0.000352688
2123	EVI2A	8014066	1627.64	0.000353878
219293	ATAD3C	7896937	485.132	0.000354109
3622	ING2	8098508	344.913	0.000354156
9817	KEAP1	8034034	385.978	0.000354564
80205	CHD9	7995583	337.407	0.000355377
170394	PWWP2B	7931469	489.646	0.000355629
400629	TEX19	8010780	799.79	0.000355726
57645	POGK	7907024	564.762	0.00035593
63893	UBE2O	8018708	293.719	0.000356176
23248	RPRD2	7905185	201.71	0.000356239
25943	C20orf194	8064637	479.586	0.000356961
8974	P4HA2	8114002	527.745	0.000357465
9659	PDE4DIP	7904965	522.165	0.000357607
28990	ASTE1	8090664	594.895	0.000358981
25921	ZDHHC5	7940051	308.465	0.00035899
23522	MYST4	7928491	332.323	0.00035929
113691	MGC16703	8074695	688.924	0.000359407
100130924	LOC100130924	8077877	589.799	0.000360455
55092	TMEM51	7898115	315.16	0.000360565
26533	OR10G3	7977767	1181.37	0.000360928
58526	MID1IP1	8166797	187.175	0.000361786
100130269	LOC100130269	8072603	638.587	0.000362253
1185	CLCN6	7897774	180.643	0.000362427
9743	ARHGAP32	7952641	300.532	0.000363065
113179	ADAT3	8024356	166.869	0.00036347
140901	STK35	8060427	327.307	0.000365249
165530	CLEC4F	8052908	626.924	0.000366188
55602	CDKN2AIP	8098500	330.006	0.000366582
152485	ZNF827	8103025	178.912	0.0003677
6926	TBX3	7966690	424.769	0.000367859
63892	THADA	8051820	543.087	0.000368944
22992	KDM2A	7941769	247.904	0.000369649
5151	PDE8A	7985662	374.548	0.000370091
148203	ZNF738	8027297	581.901	0.000371839
92070	C4orf42	8093456	254.028	0.000375204
27197	GPR82	8166919	1900.1	0.000375969
642280	ZNF876P	8093332	1283.54	0.000376497
10293	TRAIP	8087513	505.585	0.000377283
79666	PLEKHF2	8147439	237.831	0.000378313
80820	EEPD1	8132305	593.967	0.000378516
10040	TOM1L1	8008564	310.491	0.000378703
1316	KLF6	7931810	337.481	0.000379051
5813	PURA	8108472	224.917	0.000379982
11143	MYST2	8008213	379.128	0.000380784
127396	ZNF684	7900461	495.367	0.000381066
619568	SNORA4	8084708	197.036	0.000381154
88	ACTN2	7910727	270.179	0.000382415
57167	SALL4	8067087	211.654	0.000382953
677833	SNORA54	7945801	520.497	0.000383056
100133091	LOC100133091	8133752	415.958	0.000383594
7057	THBS1	7982597	448.871	0.000384798
407000	MIR218-1	8094340	996.989	0.00038498
23551	RASD2	8072705	418.79	0.000385463
55181	C17orf71	8008795	314.416	0.000385597
79605	PGBD5	7924977	976.967	0.000386528
10563	CXCL13	8095886	2034.74	0.000386958
83881	MIXL1	7910134	532.7	0.00038838
5051	PAFAH2	7913883	689.725	0.000388845
8970	HIST1H2BJ	8124484	288.303	0.000390214
2826	CCR10	8015681	453.221	0.000390293
58500	ZNF250	8153920	726.722	0.000390706
23307	FKBP15	8163452	332.78	0.000390784
56963	RGMA	7991459	354.067	0.00039089
163702	IL28RA	7913776	422.58	0.000391915
159195	USP54	7934411	299.315	0.00039262
345062	PRSS48	8097794	479.564	0.000393198
4487	MSX1	8093852	272.593	0.000394058
79923	NANOG	7987365	1159.34	0.000394932
26751	SH3YL1	8049969	1090.45	0.000395726
26040	SETBP1	8021047	356.723	0.000397312
64410	KLHL25	7991173	478.978	0.000397839
2104	ESRRG	7924309	611.498	0.000398459
5864	RAB3A	8035398	687.396	0.000399062
22880	MORC2	8075430	325.882	0.000399423
23001	WDFY3	8101511	489.48	0.000400411
56899	ANKS1B	7965686	1129.97	0.000401326
10023	FRAT1	7929616	437.566	0.000401728
91603	ZNF830	8006477	257.13	0.000402073
23185	LARP4B	7931728	258.212	0.000402164
677794	SNORA2B	7962829	514.928	0.000402698
4306	NR3C2	8103094	268.567	0.000403779
23650	TRIM29	7952290	827.986	0.000403799
4543	MTNR1A	8104074	401.505	0.000404079
7091	TLE4	8156060	186.659	0.000404556
29959	NRBP1	8040927	280.754	0.000405233
389610	XKR5	8149086	1265.16	0.000405385
7726	TRIM26	8179638	315.586	0.000405485
387032	ZKSCAN4	8124553	881.067	0.000406241
81533	ITFG1	8001233	752.095	0.000406824
10626	TRIM16	8012953	287.273	0.000407072
51421	AMOTL2	8090852	435.907	0.000407368
54915	YTHDF1	8067593	238.209	0.000407804
56905	C15orf39	7984952	109.995	0.000408157
653635	WASH7P	7911309	257.38	0.000408579
284083	C17orf47	8017057	1263.66	0.000410047
10579	TACC2	7931031	527.065	0.000410209
55527	FEM1A	8024898	213.683	0.000410325
387748	OR56B1	7938049	1105.59	0.000411624
64895	PAPOLG	8042119	243.115	0.000412763
5732	PTGER2	7974366	496.717	0.000413883
4969	OGN	8162373	799.429	0.000414101
203562	TMEM31	8169056	788.826	0.000414739
2498	FTHL3	8051133	156.281	0.000415239
11174	ADAMTS6	8112342	960.801	0.000415241
59350	RXFP1	8098060	1154.42	0.000416231
91355	LRP5L	8075052	530.863	0.000416603
147183	KRT25	8015070	999.677	0.000416731
7707	ZNF148	8090237	248.444	0.000416963
206412	C6orf163	8121009	1050.63	0.000417571
9697	TRAM2	8127051	360.456	0.00041773
137994	LETM2	8145942	608.432	0.000417858
140701	C20orf135	8064203	581.14	0.000418477
84146	ZNF644	7917604	264.441	0.000419348
7633	ZNF79	8158022	529.284	0.000419391
100151684	RNU6ATAC	8107855	620.598	0.000419464
26512	INTS6	7971692	397.42	0.000419475
151009	LOC151009	8044346	211.312	0.00042067
4802	NFYC	7900468	293.356	0.000421199
8312	AXIN1	7998211	299.9	0.000422666
53358	SHC3	8162216	317.954	0.000423558
23117	NPIPL3	8000205	178.229	0.000424726
84843	MGC15705	8072484	939.492	0.000426024
4943	TBC1D25	8167314	293.848	0.000426143
80035	C15orf28	7990027	260.462	0.000426405
57474	ZNF490	8034408	604.503	0.000427047
85463	ZC3H12C	7943715	362.394	0.00043059
57514	ARHGAP31	8081838	400.052	0.00043088
4157	MC1R	7998055	463.981	0.000431078
57659	ZBTB4	8012212	280.12	0.000431086
390	RND3	8055688	220.549	0.000431245
652	BMP4	7979241	368.867	0.000433245
129530	LYG1	8054209	456.487	0.000433407
79648	MCPH1	8144361	399.263	0.000435365
8445	DYRK2	7956930	252.697	0.000435744
55054	ATG16L1	8049271	458.75	0.000435935
10024	TROAP	7955195	137.437	0.000436208
90249	UNC5A	8110237	747.228	0.000436591
51198	C9orf53	8154654	535.515	0.000439105
604	BCL6	8092691	283.584	0.000439624
414060	TBC1D3C	8014397	327.59	0.00044099
2263	FGFR2	7936734	332.648	0.000441172
10560	SLC19A2	7922162	214.28	0.000441793
23049	SMG1	8000687	302.068	0.000442924
23352	UBR4	7913001	257.35	0.000443573
7695	ZNF136	8025998	607.107	0.000444208
25799	ZNF324	8031956	336.483	0.000445675
3164	NR4A1	7955589	188.948	0.000445864
3493	IGHA1	7995263	483.752	0.000445872
27086	FOXP1	8088776	382.488	0.000450965
9849	ZNF518A	7929562	338.308	0.000451058
56652	C10orf2	7929901	280.757	0.000451426
10172	ZNF256	8039706	756.03	0.00045147
442578	STAG3L3	8133610	250.654	0.000453558
57697	FANCM	7974166	397.763	0.000453796
256714	MAP7D2	8171725	756.485	0.000455678
64577	ALDH8A1	8129695	389.566	0.00045645
10215	OLIG2	8068231	502.389	0.000456455
147040	KCTD11	8004360	813.922	0.000456614
55534	MAML3	8102862	257.267	0.000456963
3975	LHX1	8006681	372.008	0.000458
90799	CCDC45	8009255	330.177	0.00045889
57585	CRAMP1L	7992302	521.974	0.000459689
147341	C18orf23	8021129	801.42	0.00046046
8874	ARHGEF7	7970111	353.552	0.000460725
29960	FTSJ2	8137826	318.292	0.000460946
80869	HCG8	8124691	359.138	0.00046256
57615	ZNF492	8027345	592.393	0.000462668
121504	HIST4H4	7961483	713.823	0.00046472
11329	STK38	8119076	884.024	0.000466984
9367	RAB9A	8166098	308.01	0.00046747
221545	C6orf136	8179167	322.462	0.000467809
221545	C6orf136	8177851	322.462	0.000467809
91694	LONRF1	8149399	231.373	0.000468324
4848	CNOT2	7957106	215.862	0.000469424
5320	PLA2G2A	7913216	879.004	0.000469466
375449	MAST4	8105741	506.247	0.000470081
26230	TIAM2	8122933	494.547	0.000470333
55696	RBM22	8115168	461.285	0.000471828
23005	MAPKBP1	7982985	348.081	0.000471829
54910	SEMA4C	8054004	251.516	0.000473312
54856	GON4L	7920810	421.838	0.000473372
80764	THAP7	8074688	318.546	0.000474059
10936	GPR75	8052143	249.851	0.000474719
10124	ARL4A	8131573	425.278	0.000475311
10044	SH2D3C	8164252	443.147	0.000478365
51512	GTSE1	8073858	336.877	0.000480161
81931	ZNF93	8027247	982.699	0.0004803
57653	KIAA1529	8156633	810.425	0.000480496
7405	UVRAG	7942626	260.188	0.000481602
57057	TBX20	8138997	399.861	0.000481813
9589	WTAP	8126952	363.057	0.000482236
6311	ATXN2	7966397	288.972	0.000485703
9569	GTF2IRD1	8133477	224.967	0.000485908
57604	C8orf79	8144712	1403.17	0.000487469
83987	CCDC8	8037762	496.103	0.000487699
285955	SPDYE1	8132531	227.868	0.0004887
60686	C14orf93	7977868	519.969	0.000489295
55657	ZNF692	7925773	384.533	0.000489682
406918	MIR129-2	7939463	1313.47	0.000490149
9683	N4BP1	8001317	308.121	0.000490401
204	AK2	7914617	339.127	0.000490955
1346	COX7A1	8036284	514.305	0.00049146
23095	KIF1B	7897561	475.082	0.000493249
377630	USP17L2	8149243	221.016	0.00049374
377630	USP17L2	8149356	221.016	0.00049374
9639	ARHGEF10	8144281	506.447	0.000493842
55018	C17orf73	8016735	897.181	0.000494502
79797	ZNF408	7939699	338.481	0.000494535
23387	SIK3	7951873	187.729	0.00049654
9970	NR1I3	7921840	885.129	0.000496629
3725	JUN	7916609	130.427	0.000497365
54734	RAB39	7943577	378.371	0.000498877
313	AOAH	8139033	1942.9	0.000499109
43	ACHE	8141648	440.892	0.000499554
26152	ZNF337	8065517	435.577	0.000501532
65986	ZBTB10	8147040	360.684	0.000502877
389384	C6orf222	8125980	928.165	0.000504662
10769	PLK2	8112202	499.59	0.000504961
157753	TMEM74	8152335	494.585	0.000505468
441376	C8orf85	8148000	739.811	0.000505772
84441	MAML2	7951133	564.489	0.000505908
158038	LINGO2	8160546	608.2	0.000506146
53335	BCL11A	8052399	331.602	0.000507385
1144	CHRND	8049152	513.482	0.000508046
1951	CELSR3	8087145	390.382	0.000510168
53353	LRP1B	8055496	1583.71	0.000510732
571	BACH1	8068105	378.719	0.000511139
468	ATF4	8073148	221.018	0.000512562
89884	LHX4	7907849	369.548	0.000512573
222256	CDHR3	8135341	577.873	0.000513123
83903	GSG2	8003844	244.778	0.00051496
59348	ZNF350	8038919	462.161	0.000516225
220213	OTUD1	7926677	186.353	0.000518133
23275	POFUT2	8070876	392.565	0.000518695
84719	C1orf217	7908966	635.914	0.000519199
128637	TBC1D20	8064336	381.43	0.0005199
6095	RORA	7989365	441.057	0.000520542
10820	OR7E13P	7950883	783.705	0.000520669
267020	ATP5L2	8076493	869.233	0.000521444
25909	AHCTF1	7925622	390.502	0.000521668
403341	ZBTB34	8157945	249.683	0.000522627
8870	IER3	8178435	214.738	0.000524035
11070	TMEM115	8087685	168.463	0.000525283
51152	LOC51152	8071051	216.286	0.000525699
2122	MECOM	8091972	459.107	0.000525994
26053	AUTS2	8133233	345.401	0.000526713
84865	CCDC142	8053171	238.025	0.000527935
3171	FOXA3	8029754	431.35	0.000527993
128312	HIST3H2BB	7910369	289.167	0.000528367
9839	ZEB2	8055624	447.451	0.000528585
64762	FAM59A	8022803	193.867	0.000528692
55299	BRIX1	8104825	320.917	0.000528712
140459	ASB6	8164572	276.41	0.000528933
338755	OR2AG2	7946278	807.811	0.000529064
80778	ZNF34	8153896	803.338	0.000530146
63875	MRPL17	7946267	372.264	0.000531074
91833	WDR20	7976957	348.892	0.000531815
129138	ANKRD54	8075971	245.943	0.00053198
339524	LOC339524	7902799	571.015	0.000531983
51526	C20orf111	8066402	328.929	0.000532487
55582	KIF27	8156160	290.016	0.000534303
11108	PRDM4	7966072	285.49	0.000534434
5893	RAD52	7960261	355.595	0.000536
27289	RND1	7962884	594.267	0.000536418
79230	ZNF557	8025132	529.702	0.00053645
54465	ETAA1	8042373	364.159	0.000536485
9726	ZNF646	7995033	485.188	0.000536498
84302	C9orf125	8162902	374.041	0.00053795
56995	TULP4	8123044	251.212	0.000538436
153090	DAB2IP	8157610	260.987	0.000538448
90355	C5orf30	8107194	275.448	0.000539918
79720	VPS37B	7967331	158.962	0.000540418
54442	KCTD5	7992685	530.365	0.000540632
90441	ZNF622	8111129	362.739	0.000541138
79633	FAT4	8097288	690.099	0.000541599
100287290	LOC100287290	8083652	690.695	0.000541915
387755	INSC	7938652	587.218	0.000543375
131096	KCNH8	8078196	1668.06	0.000543621
23117	NPIPL3	7994026	201.58	0.000544122
55609	ZNF280C	8175076	160.55	0.000544146
285527	FRYL	8100251	431.5	0.000544497
26786	SNORD62A	8158864	115.038	0.000544636
26786	SNORD62A	8158862	115.038	0.000544636
6549	SLC9A2	8044080	761.88	0.000545223
387790	LOC387790	7942647	742.64	0.000547215
23081	KDM4C	8154333	580.65	0.000548402
64925	CCDC71	8087372	363.024	0.000548847
149483	CCDC17	7915743	592.511	0.000549449
54891	INO80D	8058415	337.944	0.000550778
56957	OTUD7B	7919699	235.781	0.00055174
7726	TRIM26	8124726	289.168	0.000553468
79027	ZNF655	8134631	391.706	0.00055352
8658	TNKS	8144528	394.14	0.000554308
7205	TRIP6	8134981	356.429	0.000555071
2130	EWSR1	8072206	404.08	0.000555799
64375	IKZF4	7956105	554.597	0.000555951
81061	OR11H1	7977450	829.587	0.00055687
9733	SART3	7966098	452.087	0.000556995
2543	GAGE1	8167573	259.434	0.000558075
6489	ST8SIA1	7961757	620.615	0.000558484
342357	ZKSCAN2	8000399	399.199	0.000560294
120400	FAM55A	7951789	1814.06	0.000560692
138716	C9orf23	8160835	450.98	0.00056145
54886	LPPR1	8156923	1260.67	0.000562038
79549	OR6J1	7977782	937.261	0.000562336
406	ARNTL	7938563	364.892	0.000563595
10161	LPAR6	7971565	443.302	0.000563638
3167	HMX2	7931184	353.265	0.000563708
7988	ZNF212	8137112	205.599	0.000564855
3714	JAG2	7981538	323.22	0.000565397
6000	RGS7	7925457	800.942	0.000566041
127602	DNAH14	7910054	732.241	0.000566197
7008	TEF	8073422	461.571	0.000566512
9673	SLC25A44	7906128	176.576	0.000567875
7752	ZNF200	7998931	511.461	0.000568155
23528	ZNF281	7923183	416.179	0.000568724
54785	C17orf59	8012397	377.736	0.0005691
57567	ZNF319	8001651	524.66	0.000569423
3798	KIF5A	7956522	397.402	0.00056981
55015	PRPF39	7974146	271.465	0.000570559
10270	AKAP8	8035007	413.401	0.000570577
8870	IER3	8179704	194.72	0.000570948
8870	IER3	8124848	194.72	0.000570948
644591	PPIAL4G	7919157	658.025	0.000571591
84536	C21orf67	8070853	743.929	0.000572886
283991	FAM100B	8010050	213.903	0.000573405
9436	NCR2	8119435	681.957	0.000574226
8972	MGAM	8136662	838.756	0.000575078
389616	OR7E125P	8144422	615.512	0.000575187
3178	HNRNPA1	7955890	222.089	0.000575393
9301	SNORD27	7948906	141.208	0.000576718
119016	AGAP4	7927231	377.718	0.000578583
10678	B3GNT2	8042211	266.253	0.000579469
692088	SNORD50B	8127989	141.541	0.000579495
8324	FZD7	8047487	297.891	0.000580349
27342	RABGEF1	8133176	347.001	0.000581184
388022	LOC388022	7977270	191.385	0.000581898
85451	UNK	8009995	188.183	0.000582239
79812	MMRN2	7934842	588.435	0.000582387
2636	GBX1	8143885	573.742	0.000583504
407036	MIR32	8163107	1382.07	0.00058372
5347	PLK1	7994109	224.323	0.000583934
64793	CCDC21	7899134	398.293	0.000585444
4790	NFKB1	8096635	372.23	0.000585458
22987	SV2C	8106336	974.478	0.000586431
2114	ETS2	8068593	388.987	0.000589529
162461	TMEM92	8008289	422.894	0.000589674
7494	XBP1	8075182	256.332	0.000589937
23268	DNMBP	7935660	365.421	0.000593056
54897	CASZ1	7912343	692.449	0.000593217
3104	ZBTB48	7897305	456.239	0.000593295
65997	RASL11B	8095043	478.632	0.000593487
80775	TMEM177	8044844	481.709	0.000593689
5166	PDK4	8141094	561.962	0.000595495
253461	ZBTB38	8083092	529.447	0.000596764
23671	TMEFF2	8057803	566.986	0.000596835
9150	CTDP1	8021884	474.919	0.000597474
6299	SALL1	8001387	121.142	0.000597723
440193	CCDC88C	7980773	272.19	0.000598281
2520	GAST	8007148	739.181	0.000598971
1358	CPA2	8136187	496.214	0.000599099
84133	ZNRF3	8072160	279.47	0.000599711
60312	AFAP1	8099259	431.895	0.00060017
55867	SLC22A11	7941062	536.61	0.000601169
23303	KIF13B	8150036	644.951	0.000601418
285220	EPHA6	8081138	841.376	0.000602185
407050	MIR93	8141421	375.556	0.000602953
26115	TANC2	8009075	361.397	0.00060336
79818	ZNF552	8031825	286.844	0.000604037
4277	MICB	8118116	310.274	0.000605577
5806	PTX3	8083594	658.872	0.000606429
257364	SNX33	7985016	220.345	0.000607106
677826	SNORA45	7938293	218.016	0.000607777
64121	RRAGC	7915160	403.902	0.000608225
2785	GNG3	7940673	511.759	0.000610052
201514	ZNF584	8031939	395.128	0.000610304
23409	SIRT4	7959148	469.814	0.0006104
349196	LOC349196	8149228	212.959	0.000610513
151963	C3orf59	8092765	309.769	0.000610587
348793	WDR53	8093141	364.965	0.000611396
8412	BCAR3	7917754	293.183	0.00061169
55330	CNO	8093957	530.917	0.000611995
1781	DYNC1I2	8046340	437.201	0.000612837
25	ABL1	8158725	278.246	0.000613858
29995	LMCD1	8077490	545.585	0.000614233
2886	GRB7	8006940	416.567	0.000614676
85376	RIMBP3	8074593	303.982	0.000615987
138241	C9orf85	8155794	452.694	0.000616543
340526	RGAG4	8173503	496.016	0.000616811
3169	FOXA1	7978706	290.955	0.000617835
23067	SETD1B	7959314	305.235	0.000619136
26289	AK5	7902452	1037.08	0.000620104
25942	SIN3A	7990487	215.832	0.000622452
222255	ATXN7L1	8142098	513.473	0.000622607
22823	MTF2	7903032	284.798	0.000622884
169792	GLIS3	8159900	464.769	0.000623283
57728	WDR19	8094638	461.532	0.000624101
64763	ZNF574	8029182	229.996	0.000625497
9629	CLCA3P	7902754	1904.56	0.00062719
442582	STAG3L2	8140196	230.294	0.000628084
54850	FBXL12	8033813	371.235	0.000628422
222255	ATXN7L1	8142096	483.556	0.00062847
406900	MIR106B	8141423	454.814	0.000628901
23401	FRAT2	7935421	445.03	0.000629041
23117	NPIPL3	8000131	196.932	0.000629414
348980	HCN1	8111998	879.259	0.000629617
7844	RNF103	8053576	378.916	0.00063027
406996	MIR214	7922326	679.822	0.000630968
54949	SDHAF2	7940486	363.368	0.000632156
84292	WDR83	8026013	694.294	0.000632333
284406	ZFP82	8036309	475.66	0.000632837
84767	SPRYD5	7950977	1120.88	0.000632855
84767	SPRYD5	7943019	1120.88	0.000632855
113763	C7orf29	8137219	257.764	0.000633855
2869	GRK5	7930894	333.319	0.00063763
57147	SCYL3	7922250	364.942	0.000638107
2086	ERV3	8139840	422.848	0.000639529
646	BNC1	7991080	765.665	0.000640002
219960	OR10Q1	7948314	829.842	0.00064165
285313	IGSF10	8091537	862.055	0.000641686
345193	LRIT3	8096839	788.552	0.000641881
60468	BACH2	8128247	385.064	0.000643311
2335	FN1	8048139	733.895	0.00064432
7621	ZNF70	8074931	332.652	0.000645188
100132099	LOC100132099	7969794	469.684	0.000646419
387119	C6orf204	8129193	556.168	0.000646438
5326	PLAGL2	8065607	233.462	0.000647384
221785	ZNF498	8134644	272.551	0.000648166
641339	ZNF674	8172274	649.06	0.000648432
2018	EMX2	7930857	554.501	0.00064912
30817	EMR2	8034873	703.698	0.000649491
4097	MAFG	8019798	425.868	0.000651867
6752	SSTR2	8009526	534.395	0.000652349
128346	C1orf162	7903980	400.841	0.000654538
284009	LOC284009	8011270	591.98	0.000655079
677825	SNORA44	7914214	413.101	0.000655424
100129831	LOC100129831	8024444	670.913	0.000656153
6524	SLC5A2	7995222	507.194	0.000656812
80301	PLEKHO2	7984217	365.683	0.000658731
6662	SOX9	8009517	515.23	0.000658983
27039	PKD2L2	8108267	1202.79	0.000659563
4609	MYC	8148317	58.4123	0.000660303
55870	ASH1L	7920766	262.622	0.000660594
55279	ZNF654	8081069	422.247	0.000660689
23251	KIAA1024	7985248	364.787	0.00066181
7189	TRAF6	7947540	334.02	0.00066478
6811	STX5	7948864	307.572	0.000667379
9493	KIF23	7984540	315.968	0.000667423
8036	SHOC2	7930470	347.233	0.00066753
85460	ZNF518B	8099364	366.09	0.00066988
406948	MIR15A	7971661	495.316	0.000670698
333932	HIST2H3A	7919614	451.041	0.000670877
333932	HIST2H3A	7905085	451.041	0.000670877
65260	C1orf163	7916219	322.145	0.000673146
117154	DACH2	8168604	685.184	0.000674319
492311	C5orf53	8108475	479.521	0.000674414
9266	CYTH2	8030049	337.972	0.000674927
389524	GTF2IRD2B	8133549	1203.2	0.000675044
7711	ZNF155	8029340	639.229	0.00067764
403273	OR5H14	8081200	735.466	0.000678
284565	NBPF15	7904976	406.384	0.00067831
220001	VWCE	7948511	407.756	0.000678574
164091	PAQR7	7913858	535.515	0.000678847
6077	SNORD13P2	8131263	572.435	0.000681041
8737	RIPK1	8116622	409.496	0.00068215
80307	FER1L4	8065948	376.648	0.000682784
3394	IRF8	7997712	520.203	0.000683167
728131	RPS6P6	8101357	715.962	0.000685389
692227	SNORD104	8009241	236.287	0.000687459
7273	TTN	8057056	1195.73	0.000687515
29942	PURG	8150143	480.118	0.000688155
79716	NPEPL1	8063650	358.325	0.000688644
2134	EXTL1	7899075	950.374	0.000688716
7084	TK2	8001818	676.872	0.000689276
91947	ARRDC4	7986350	262.588	0.00069075
223082	ZNRF2	8132062	305.134	0.000691092
4773	NFATC2	8067040	371.611	0.000691392
4610	MYCL1	7915277	405.124	0.000693894
84858	ZNF503	7928529	713.804	0.000694896
54676	GTPBP2	8126629	226.693	0.000695212
4144	MAT2A	8043187	514.48	0.000695295
28997	PRO0611	7899602	718.666	0.000696771
6375	XCL1	7907156	674.024	0.000697561
10485	C1orf61	7921003	381.465	0.000700988
444882	IGFL4	8037750	616.101	0.000701001
6310	ATXN1	8124040	303.298	0.000702032
84181	CHD6	8066303	444.962	0.000702962
283767	GOLGA6L1	7986736	1129.72	0.000704031
200942	KLHDC8B	8079733	725.251	0.000704262
91	ACVR1B	7955535	445.47	0.000706537
84948	TIGD5	8148655	350.785	0.000706737
26098	C10orf137	7931239	275.731	0.000708365
653604	HIST2H3D	7919612	448.166	0.000708945
8357	HIST1H3H	8117589	299.895	0.000710386
5724	PTAFR	7914184	786.213	0.000711242
64789	DEM1	7900454	534.774	0.000712316
4693	NDP	8172220	1278.7	0.000712545
388692	LOC388692	7905058	424.299	0.000712735
51667	NUB1	8143937	687.308	0.0007159
100131763	LOC100131763	8049950	548.382	0.000717402
59269	HIVEP3	7915392	847.486	0.000717586
390999	PRAMEF12	7897974	1170.53	0.000718986
2209	FCGR1A	7905060	1495.52	0.000719708
145282	MIPOL1	7973985	453.233	0.000720414
406954	MIR181A2	8157800	689.974	0.000724938
23510	KCTD2	8009737	270.894	0.000725284
136051	ZNF786	8143697	383.255	0.00072778
57053	CHRNA10	7945896	865.916	0.000727794
8045	RASSF7	7937407	306.55	0.000729354
9825	SPATA2	8066953	447.326	0.000729611
6482	ST3GAL1	8153021	303.553	0.000732215
221416	C6orf223	8119918	1138.67	0.000733048
55603	FAM46A	8127778	259.761	0.00073368
80851	SH3BP5L	7925763	601.997	0.000733772
27153	ZNF777	8143714	283.611	0.000737574
29092	HSPC157	7898736	438.091	0.000739124
2099	ESR1	8122840	1167.42	0.000740741
50832	TAS2R4	8136645	542.822	0.000741828
677778	SCARNA15	7985480	1133.87	0.000742011
112840	WDR89	7979565	344.21	0.0007421
7570	ZNF22	7927202	463.554	0.000743528
534	ATP6V1G2	8179762	968.778	0.000743723
534	ATP6V1G2	8124942	968.778	0.000743723
999	CDH1	7996837	946.723	0.000744343
23644	EDC4	7996685	244.29	0.000744873
353274	ZNF445	8086482	394.026	0.00074567
284114	TMEM102	8004404	319.389	0.000748769
80271	ITPKC	8028908	585.388	0.000750258
25956	SEC31B	7935780	450.988	0.000750471
135398	C6orf141	8120176	382.049	0.000751523
7071	KLF10	8152215	385.135	0.000752601
1958	EGR1	8108370	37.3222	0.000753297
57568	SIPA1L2	7925062	319.963	0.000754258
677803	SNORA15	8133072	508.045	0.000756321
677803	SNORA15	8133108	508.045	0.000756321
494335	MIR423	8006119	590.541	0.000756329
100127951	LOC100127951	7997166	878.397	0.000756747
2121	EVC	8093878	603.183	0.000757013
55135	WRAP53	8012270	307.213	0.000757025
80185	C8orf41	8150175	459.505	0.000758797
692087	SNORD49B	8005200	243.011	0.000759922
91133	L3MBTL4	8022145	989.478	0.000762173
285429	DCAF4L1	8094843	602.228	0.000762612
54429	TAS2R5	8136647	634.269	0.000762826
84858	ZNF503	7934553	206.969	0.000762899
7551	ZNF3	8141380	511.065	0.000763703
5251	PHEX	8166408	1729.78	0.000764066
9663	LPIN2	8022022	479.701	0.000764178
79937	CNTNAP3	8161460	992.417	0.000765079
79937	CNTNAP3	8155540	992.417	0.000765079
342909	ZNF284	8029368	576.075	0.000765297
126859	C1orf125	7907719	1564.02	0.000765959
79020	C7orf25	8139228	883.422	0.000766531
84173	ELMOD3	8043131	527.082	0.000767826
64849	SLC13A3	8066757	351.471	0.000768036
114036	C21orf82	8068363	827.299	0.000768149
113278	C20orf54	8064388	470.671	0.000768558
2117	ETV3	7921228	303.588	0.000772354
84261	FBXW9	8034469	447.477	0.000772896
246734	NPCDR1	8088468	1439.88	0.000773562
29994	BAZ2B	8056060	388.302	0.000775123
3656	IRAK2	8077786	692.779	0.000775285
56984	PSMG2	8020241	357.393	0.000776734
26082	DKFZP434L187	7982252	386.896	0.000777486
90288	C3orf25	8090567	840.317	0.000780985
85376	RIMBP3	8074771	357.676	0.000781323
388121	TNFAIP8L3	7988763	716.798	0.000781701
645212	LOC645212	7988283	323.666	0.000782075
337975	KRTAP20-1	8068154	870.325	0.000784381
401027	C2orf66	8057954	537.468	0.000785302
26031	OSBPL3	8138613	480.94	0.000786456
57479	PRR12	8030403	336.743	0.000787885
7779	SLC30A1	7924092	410.173	0.000787899
51188	SS18L2	8079074	337.288	0.000788134
23013	SPEN	7898278	204.226	0.000789287
8459	TPST2	8075106	257.187	0.000790411
26084	SGEF	8083471	380.723	0.000793656
10785	WDR4	8070615	411.871	0.000793726
22993	HMGXB3	8109201	287.452	0.000795698
7693	ZNF134	8031784	894.666	0.0007961
7626	ZNF75D	8175319	865.266	0.000802763
2044	EPHA5	8100578	723.472	0.000802855
338692	ANKRD13D	7941822	352.032	0.00080293
115426	UHRF2	8154316	337.459	0.000805379
84657	C3orf42	8077815	361.311	0.000808627
3146	HMGB1	7970858	204.592	0.000809734
23359	FAM189A1	7986960	323.53	0.0008112
431707	LHX8	7902353	433.62	0.000811845
58487	CREBZF	7950796	265.997	0.000812685
1993	ELAVL2	8160459	679.639	0.000813681
283450	C12orf51	7966517	480.129	0.000813684
2310	FOXO3B	8013307	170.164	0.000814317
57182	ANKRD50	8102720	405.905	0.000814975
83607	AMMECR1L	8055096	289.458	0.000815217
6284	S100A13	7920303	626.615	0.00081587
11163	NUDT4	7957536	325.928	0.000816872
115111	SLC26A7	8147273	446.352	0.000817091
10743	RAI1	8005267	204.068	0.000820286
441191	RNF216L	8131286	284.949	0.000820384
8534	CHST1	7947599	346.692	0.000823178
8462	KLF11	8040211	293.537	0.000823653
653687	CXorf50B	8168387	597.776	0.000824486
57713	SFMBT2	7931951	446.002	0.000825937
55088	C10orf118	7936419	357.052	0.000826005
1846	DUSP4	8150076	356.815	0.000828066
9464	HAND2	8103745	500.582	0.000830328
147923	ZNF420	8028219	396.139	0.000830848
84460	ZMAT1	8174119	1271.07	0.000831369
7299	TYR	7942991	1106.27	0.000831898
1849	DUSP7	8087833	96.0198	0.000832267
442590	SPDYE5	8133654	258.553	0.000833161
406886	MIRLET7D	8156523	695.267	0.000833483
1479	CSTF3	7947396	330.601	0.000834156
80304	C2orf44	8050689	279.614	0.000835308
54567	DLL4	7982854	384.403	0.000835332
347902	AMIGO2	7962579	523.619	0.000835597
642477	FLJ39632	8074168	418.762	0.000837442
10628	TXNIP	7904726	307.656	0.000838001
27245	AHDC1	7914103	332.751	0.000838141
55844	PPP2R2D	7931405	266.767	0.000838957
9344	TAOK2	7994692	222.076	0.000839059
55323	LARP6	7990080	356.987	0.000840988
3669	ISG20	7985777	544.852	0.00084104
400863	FLJ46020	8068350	564.271	0.000841863
122786	FRMD6	7974316	537.29	0.000842559
1196	CLK2	7920737	360.662	0.000842727
51312	SLC25A37	8145281	311.219	0.000842891
79441	HAUS3	8098985	395.681	0.000845305
128344	C1orf88	7903959	1053.73	0.0008462
51735	RAPGEF6	8113881	339.222	0.000846764
23117	NPIPL3	8000676	222.817	0.000846827
145748	LYSMD4	7991503	611.724	0.00084683
4863	NPAT	7951497	248.074	0.000847419
246	ALOX15	8011680	888.758	0.000848095
154043	CNKSR3	8130422	320.892	0.000848162
100132005	LOC100132005	8119237	611.181	0.000850323
283767	GOLGA6L1	7986741	1208.82	0.000852362
687	KLF9	8161648	336.837	0.000852575
51530	ZC3HC1	8142899	614.809	0.000853833
56882	CDC42SE1	7919888	293.35	0.000855789
7289	TULP3	7953135	322.651	0.000858118
83872	HMCN1	7908204	483.628	0.000858242
9857	CEP350	7907790	297.267	0.000859305
221178	SPATA13	7968035	545.409	0.000859359
55621	TRMT1	8034615	512.241	0.000859902
30012	TLX3	8109969	757.359	0.000860571
22850	ADNP2	8021914	223.211	0.000860949
345079	ANKRD56	8101207	1156.77	0.000862564
339229	C17orf90	8019238	637.113	0.000864262
388960	C2orf78	8042769	1092.48	0.000864601
115	ADCY9	7999079	398.858	0.000867322
728936	NBPF16	7919438	387.249	0.000868208
55809	TRERF1	8126402	417.18	0.000869807
747	DAGLA	7940508	564.234	0.000870688
9997	SCO2	8077099	377.602	0.000870772
8027	STAM	7926385	305.971	0.0008712
9882	TBC1D4	7972021	456.004	0.000871784
1130	LYST	7925257	427.472	0.000871797
80006	C5orf44	8105661	761.054	0.000872868
10758	TRAF3IP2	8128939	446.153	0.000874705
705	BYSL	8119492	447.464	0.000876372
84561	SLC12A8	8090214	669.17	0.000877991
164380	CSTT	8061396	1900.25	0.000881497
30835	CD209	8025301	608.76	0.000882354
8844	KSR1	8005785	248.109	0.000882739
158696	LOC158696	8175442	480.828	0.000883065
5128	CDK17	7965652	352.718	0.00088487
124871	FLJ40194	8008195	1112.58	0.000885852
113263	GLCCI1	8131496	207.326	0.000886607
221545	C6orf136	8117987	330.81	0.000888989
54805	CNNM2	7930194	291.21	0.000889756
54920	DUS2L	7996725	262.516	0.000891166
375748	C9orf102	8156581	403.19	0.000891492
6821	SUOX	7956097	446.731	0.000892414
388799	C20orf107	8063531	657.845	0.000893523
389289	C5orf39	8111925	527.38	0.000894202
157638	FAM84B	8152812	407.616	0.000896215
23077	MYCBP2	7972069	467.096	0.000897796
51143	DYNC1LI1	8086008	301.53	0.000898702
79628	SH3TC2	8114991	1152.11	0.00089926
4774	NFIA	7901788	364.222	0.000899955
146183	OTOA	7993848	955.186	0.000901432
56242	ZNF253	8035779	486.24	0.000901743
9310	ZNF235	8037444	709.687	0.000901971
253738	EBF3	7937039	298.219	0.000902024
285346	ZNF852	8086494	274.942	0.00090219
4140	MARK3	7977077	441.561	0.000902623
6355	CCL8	8006453	1478.19	0.000902623
8315	BRAP	7966427	422.462	0.000903788
112611	RWDD2A	8120927	464.838	0.000904209
56302	TRPV5	8143518	959.951	0.000906322
27324	TOX3	8001394	687.387	0.000906856
3508	IGHMBP2	7942073	428.035	0.000907242
4520	MTF1	7915091	239.824	0.000907808
22898	DENND3	8148476	488.858	0.000908875
56884	FSTL5	8103483	706.069	0.000909107
6832	SUPV3L1	7927981	367.626	0.000910097
10733	PLK4	8097356	279.972	0.000910246
23172	FAM175B	7931216	333.675	0.000911845
11237	RNF24	8064766	348.94	0.000914652
7090	TLE3	7990033	199.33	0.000914912
27122	DKK3	7938481	1277.57	0.000916034
405754	ERVFRDE1	8123929	732.197	0.000920741
5564	PRKAB1	7959123	300.127	0.000922124
8940	TOP3B	8074817	207.145	0.000923518
340351	AGBL3	8136370	460.723	0.000928866
11083	DIDO1	8067563	249.274	0.000929163
55072	RNF31	7973584	275.158	0.000930591
90317	ZNF616	8038954	406.6	0.000930651
81848	SPRY4	8114797	118.419	0.000930786
56129	PCDHB7	8108708	1651.7	0.000933015
100129884	LOC100129884	7971965	435.271	0.000933783
51307	FAM53C	8108321	273.788	0.000934475
23060	ZNF609	7984203	209.505	0.000934698
2619	GAS1	8162179	364.353	0.000934735
7918	BAT4	8124998	403.223	0.000935271
5598	MAPK7	8005576	219.346	0.000935473
3218	HOXB8	8016473	335.58	0.000935645
9728	SECISBP2L	7988581	416.549	0.000935738
79596	RNF219	7972180	324.742	0.000936183
150248	C22orf15	8071745	673.913	0.000938659
55038	CDCA4	7981525	200.484	0.000938884
85462	FHDC1	8097829	559.398	0.000939533
6942	TCF20	8076436	386.571	0.000939638
10210	TOPORS	8160581	305.457	0.000939925
4616	GADD45B	8024485	430.339	0.00094344
6660	SOX5	7961798	659.144	0.000943732
2071	ERCC3	8054995	689.091	0.000944412
7128	TNFAIP3	8122265	417.303	0.000944978
374973	C1orf223	7901253	752.542	0.000945151
64399	HHIP	8097628	633.532	0.000945692
23164	MPRIP	8005235	287.284	0.000946126
100286937	LOC100286937	8141765	487.309	0.000947139
9	NAT1	8144857	1483.31	0.000947328
64110	MAGEF1	8092514	360.095	0.000947813
253143	C22orf30	8075542	362.938	0.000948585
5507	PPP1R3C	7934997	1007.48	0.000949475
7020	TFAP2A	8123864	133.718	0.000949526
400581	GRAPL	8013327	610.256	0.000950088
400581	GRAPL	8005555	610.256	0.000950088
692312	PPAN-P2RY11	8025563	359.394	0.000950577
9284	NPIP	7999766	166.028	0.000950763
157739	TDH	8144604	780.538	0.000952778
5814	PURB	8139430	502.821	0.000953589
84068	SLC10A7	8103043	418.974	0.00095587
84749	USP30	7958439	560.613	0.000955985
3207	HOXA11	8138765	484.722	0.000956588
93622	LOC93622	8093943	272.439	0.000958237
4688	NCF2	7922773	803.734	0.000958259
4703	NEB	8055711	585.026	0.000961875
1960	EGR3	8149720	440.239	0.000962082
57565	KLHL14	8022817	698.642	0.000965351
54718	BTN2A3	8117470	618.481	0.000967222
51427	ZNF107	8133049	398.019	0.000967331
643763	LOC643763	8146633	838.311	0.000968783
9880	ZBTB39	7964300	406.676	0.000970177
8434	RECK	8155169	592.667	0.000974242
23140	ZZEF1	8011542	400.276	0.000974814
63916	ELMO2	8066716	279.776	0.000977764
49854	ZNF295	8070557	258.674	0.000978399
8969	HIST1H2AG	8117535	375.501	0.000979521
284424	C19orf30	8024888	339.313	0.000980681
406915	MIR128-1	8045453	1084.81	0.000981309
1912	PHC2	7914648	423.917	0.000981702
79668	PARP8	8105191	529.735	0.000983537
79970	ZNF767	8143733	312.979	0.000985704
162417	NAGS	8007550	406.562	0.000986094
55167	MSL2	8090893	144.22	0.000986727
80169	C17orf68	8012423	247.013	0.000986922
152518	NFXL1	8100179	269.177	0.000988455
55897	MESP1	7991332	377.289	0.000988678
692157	SNORA16B	7909601	1754.16	0.000992123
23007	PLCH1	8091600	743.954	0.000992606
8110	DPF3	7979963	593.911	0.000992962
8370	HIST2H4A	7919627	289.519	0.000993377
8370	HIST2H4A	7905067	289.519	0.000993377
8289	ARID1A	7899220	171.045	0.000994442
23598	PATZ1	8075493	297.213	0.00099808
57673	BEND3	8128620	318.153	0.000998597
49860	CRNN	7920178	665.311	0.000999711
23708	GSPT2	8167654	800.996	0.00100073
27106	ARRDC2	8026915	405.67	0.0010014
1562	CYP2C18	7929466	296.556	0.00100178
9831	ZNF623	8148658	439.643	0.0010046
79745	CLIP4	8041179	466.038	0.00100485
64852	TUT1	7948685	510.57	0.00100504
9710	KIAA0355	8027604	278.625	0.00100635
23054	NCOA6	8065776	249.852	0.00100739
79447	C16orf53	7994655	233.611	0.00100741
389072	PLEKHM3	8058512	679.884	0.00100797
6792	CDKL5	8166289	381.778	0.00100901
81565	NDEL1	8004867	257.75	0.00100951
25832	NBPF14	7904569	511.763	0.00101028
7775	ZNF232	8011817	742.506	0.00101035
80772	GLTPD1	8039937	270.033	0.0010116
9709	HERPUD1	7995895	311.426	0.00101188
635	BHMT	8106504	1085.9	0.00101239
4901	NRL	7978107	812.308	0.00101261
222234	FAM185A	8135211	412.205	0.00101316
50489	CD207	8052916	714.135	0.00101334
4086	SMAD1	8097657	376.785	0.00101491
4040	LRP6	7961339	376.118	0.00101591
148254	ZNF555	8024518	395.709	0.00101636
403244	OR2T35	7925757	928.213	0.0010177
10838	ZNF275	8170635	459.475	0.00101885
51061	TXNDC11	7999478	386.514	0.00101907
406956	MIR181B2	8157802	763.059	0.00101966
64326	RFWD2	7922504	509.401	0.00102014
90407	TMEM41A	8092534	338.103	0.00102043
222255	ATXN7L1	8142100	601.898	0.00102094
25852	ARMC8	8082940	262.271	0.00102138
51277	DNAJC27	8050790	850.845	0.00102162
1869	E2F1	8065710	334.494	0.00102233
55211	DPPA4	8089448	869.126	0.00102362
92344	GORAB	7907213	606.402	0.0010249
7310	ZRSR1	8107353	350.627	0.00102529
83891	SNX25	8098581	344.787	0.00102646
92565	FANK1	7931281	1074.81	0.00102986
90025	UBE2CBP	8127824	566.652	0.00103087
7746	ZNF193	8117655	684.106	0.00103118
51330	TNFRSF12A	7992789	201.24	0.00103249
441234	ZNF716	8133018	1014.87	0.00103596
162282	ANKFN1	8008609	2194.88	0.0010386
6239	RREB1	8116740	291.849	0.00103982
391191	OR2AK2	7911243	1989.82	0.00104097
89780	WNT3A	7910217	666.616	0.00104759
90427	BMF	7987454	713.818	0.00104786
7566	ZNF18	8012843	772.076	0.00104796
2626	GATA4	8144643	338.198	0.00104906
84271	POLDIP3	8076465	283.597	0.00105054
1620	DBC1	8163716	2074.22	0.00105103
6843	VAMP1	7960544	557.606	0.00105122
5187	PER1	8012349	182.666	0.00105174
125919	ZNF543	8031720	398.432	0.00105415
84288	EFCAB2	7911112	854.418	0.00105421
8344	HIST1H2BE	8117389	997.178	0.00105481
10313	RTN3	7940781	271.942	0.00105656
2033	EP300	8073345	176.467	0.00106019
11249	NXPH2	8055478	457.778	0.00106044
401898	ZNF833	8025933	440.331	0.00106055
79803	HPS6	7929988	491.703	0.00106209
10612	TRIM3	7946180	509.885	0.00106219
124583	CANT1	8018982	385.196	0.00106533
481	ATP1B1	7907160	306.454	0.00106657
402682	UFSP1	8141643	493.078	0.0010674
149041	RC3H1	7922432	413.849	0.00106757
66000	TMEM108	8082767	495.395	0.00106811
25987	TSKU	7942674	497.876	0.0010705
493861	EID3	7958200	601.174	0.00107118
84437	KIAA1826	7951422	396.344	0.00107144
266977	GPR110	8126820	767.956	0.00107159
677848	SNORD1A	8010082	207.271	0.00107217
201780	SLC10A4	8094960	486.482	0.00107304
65983	GRAMD3	8107673	859.671	0.00107781
10125	RASGRP1	7987405	477.873	0.00107796
27154	BRPF3	8119034	367.392	0.00107886
79844	ZDHHC11	8110721	380.617	0.00107904
56890	MDM1	7964810	857.999	0.0010797
26058	GIGYF2	8049199	327.86	0.00108268
6006	RHCE	7913835	1321.26	0.00108279
84811	BUD13	7951826	367.861	0.00108329
57553	MICAL3	8074274	381.774	0.00108376
2908	NR3C1	8114814	359.749	0.00108603
100133746	LOC100133746	7990827	1148.64	0.00108629
445341	TNAP	7971159	933.272	0.00108795
167359	MGC42105	8105146	620.496	0.00108964
79074	C2orf49	8044127	335.41	0.00109033
83716	CRISPLD2	7997642	423.355	0.00109084
100289528	LOC100289528	8161554	324.134	0.00109514
100289528	LOC100289528	8161373	324.134	0.00109514
642838	LOC642838	8053735	370.84	0.00109603
400224	UPF0639	7975354	495.98	0.00109738
79706	PRKRIP1	8135162	454.196	0.00109748
5990	RFX2	8033097	344.252	0.00110052
2972	BRF1	7981573	519.531	0.00110214
55122	AKIRIN2	8128034	179.803	0.00110322
650	BMP2	8060850	291.492	0.00110481
474171	STGC3	8079740	674.375	0.0011067
219445	OR7E5P	7948113	425.74	0.00110773
391622	USP17L6P	8094134	214.91	0.00110872
126382	NR2C2AP	8035628	506.644	0.00111098
162517	FBXO39	8004195	936.26	0.00111142
127262	TPRG1L	7897172	456.371	0.00111338
85021	REPS1	8129901	260.839	0.00111453
55909	BIN3	8149707	485.745	0.00111494
8329	HIST1H2AI	8117583	341.8	0.001115
23266	LPHN2	7902565	300.081	0.00111603
112398	EGLN2	8028940	483.192	0.0011178
7855	FZD5	8058498	390.513	0.00111913
64746	ACBD3	7924701	452.783	0.00111942
2049	EPHB3	8084524	610.827	0.00111945
7490	WT1	7947363	356.775	0.00111984
23270	TSPYL4	8129089	595.015	0.00111993
84945	ABHD13	7969979	371.839	0.00112079
654346	LGALS9C	8005458	541.489	0.00112156
5170	PDPK1	7998825	408.464	0.00112209
55007	FAM118A	8073752	480.141	0.00112293
84654	SPZ1	8106597	1389.41	0.00112446
728661	SLC35E2	7911591	261.399	0.00112451
2905	GRIN2C	8018220	784.787	0.00112506
3480	IGF1R	7986359	276.291	0.00112639
255919	TMEM188	7995448	292.433	0.00113219
56990	CDC42SE2	8107868	349.995	0.0011323
6934	TCF7L2	7930537	240.751	0.00113291
23380	SRGAP2	7904482	360.247	0.00113293
22869	ZNF510	8162631	551.101	0.00113496
162239	ZFP1	7997257	365.065	0.0011372
377630	USP17L2	8144397	205.062	0.00113908
377630	USP17L2	8149241	205.062	0.00113908
5319	PLA2G1B	7967034	1403.92	0.00113931
22885	ABLIM3	8109093	751.169	0.00114034
57724	KIAA1632	8022996	524.657	0.00114247
23764	MAFF	8073007	419.389	0.00114386
325	APCS	7906458	1218.04	0.00114437
51264	MRPL27	8016699	461.766	0.00114611
10252	SPRY1	8097282	321.331	0.00114622
140883	ZNF280B	8074845	267.798	0.0011467
2208	FCER2	8033420	1191.01	0.00114845
9278	ZBTB22	8125731	316.572	0.00114904
6314	ATXN7	8080878	178.69	0.00115022
554207	LOC554207	7973182	1573.42	0.00115154
386627	FLJ38109	8109426	833.44	0.00115614
51341	ZBTB7A	8032755	252.674	0.00115743
283383	GPR133	7959893	1111.85	0.00115758
8609	KLF7	8058477	375.591	0.0011576
171019	ADAMTS19	8107823	582.943	0.00115789
90634	N4BP2L1	7970892	846.821	0.00115807
144568	A2ML1	7953775	817.299	0.00115826
10140	TOB1	8016739	243.389	0.00115976
1154	CISH	8087739	641.631	0.00116021
57018	CCNL1	8091658	349.037	0.00116121
8292	COLQ	8085581	896.613	0.00116187
9960	USP3	7984132	399.454	0.00116413
55689	YEATS2	8084232	359.037	0.00116634
57690	TNRC6C	8010188	258.455	0.0011669
26785	SNORD63	8114468	513.113	0.00116824
100133280	LOC100133280	8112476	357.079	0.00116933
51322	WAC	7926851	172.297	0.00117008
23314	SATB2	8058091	292.767	0.00117113
6541	SLC7A1	7970810	262.781	0.00117285
154907	C7orf66	8142329	1673.15	0.00117307
10881	ACTL7A	8157141	942.559	0.00117315
254778	C8orf46	8146703	887.943	0.00117479
84807	NFKBID	8036207	481.54	0.00117506
346157	ZNF391	8117572	755.508	0.00117623
9640	ZNF592	7985605	158.945	0.00117822
22981	NINL	8065485	666.117	0.00117851
26238	C6orf123	8123405	1407.57	0.00117918
23389	MED13L	7966706	270.287	0.00118202
10199	MPHOSPH10	8042588	222.542	0.00118256
7068	THRB	8085797	512.589	0.00118553
115950	ZNF653	8034276	436.047	0.00118734
53904	MYO3A	7926728	821.621	0.00118924
8797	TNFRSF10A	8149762	357.421	0.00119062
84820	POLR2J4	8139264	482.414	0.00119278
26820	SNORD24	8159004	285.823	0.00119403
7088	TLE1	8161919	266.047	0.00119454
8760	CDS2	8060772	528.427	0.00119467
151009	LOC151009	8054513	549.346	0.00119602
56659	KCNK13	7976182	823.71	0.00119908
24145	PANX1	7943218	370.202	0.00120173
57602	USP36	8018937	317.739	0.0012026
89796	NAV1	7908694	347.328	0.00120441
286097	EFHA2	8144742	575.12	0.00120584
7092	TLL1	8098214	675.853	0.00120616
1089	CEACAM4	8037045	851.08	0.00120766
285955	SPDYE1	8140454	292.705	0.0012125
27115	PDE7B	8122222	1272.75	0.00121304
5271	SERPINB8	8021653	758.809	0.00121327
51163	DBR1	8090960	416.503	0.00121544
113457	TUBA3D	8045291	386.999	0.00121669
404220	C6orf201	8116696	990.284	0.0012171
9792	SERTAD2	8052669	356.241	0.00121737
3821	KLRC1	7961187	1569.89	0.00121817
57180	ACTR3B	8137474	427.103	0.00121842
79026	AHNAK	7948667	420.897	0.00121966
4864	NPC1	8022531	471.138	0.00122337
115572	FAM46B	7914015	551.87	0.00122541
55777	MBD5	8045604	346.302	0.00122655
1453	CSNK1D	8019463	291.994	0.00122932
644994	C5orf50	8109990	999.961	0.00122977
124995	MRPL10	8016366	311.7	0.00123319
80975	TMPRSS5	7951717	1639.42	0.00123518
64283	RGNEF	8106210	781.321	0.00123607
285126	DNAJC5G	8040889	935.404	0.0012373
79415	C17orf62	8019507	571.384	0.00123769
285955	SPDYE1	8140424	266.373	0.00123784
23064	SETX	8164701	396.836	0.00123808
[truncated: 8,447 more rows]

## Sheet: Half-lives in iPS cells vs HFFs
Dataset 1C: Half-lives of mRNAs in iPS cells and HFFs (min)
Gene_id	Gene_sym	Transcript_id	HFF.HL	HFF.P.value	iPS.HL	iPS.P.value	Fold Difference in Half Life
202151	RANBP3L	8111569	3768.79	0.0291032	160.232	0.00794163	0.0425156
692229	SNORD105	8025584	3301.14	0.0247555	290.39	9.55792e-05	0.0879664
170261	ZCCHC12	8169598	2488.96	0.0349915	239.493	0.026111	0.0962221
407975	MIR17HG	7969576	1316.78	0.00107261	138.942	6.2621e-05	0.105517
51176	LEF1	8102232	2061.12	0.0202714	222.142	0.00265256	0.107778
4036	LRP2	8056611	2593.44	0.00294814	306.352	0.000144088	0.118126
11067	C10orf10	7933204	517.092	0.000364286	64.1434	5.70628e-05	0.124046
5981	RFC1	8165672	237.417	0.000288262	29.7441	0.0041248	0.125282
9074	CLDN6	7998898	1455.45	0.0339883	194.284	0.00683579	0.133487
10018	BCL2L11	8044375	1949.85	0.0259465	260.514	0.000178063	0.133607
9883	POM121	8133326	394.295	0.0131128	53.2536	0.00692861	0.13506
100129318	LOC100129318	7992996	3504.82	0.022082	495.378	1.6075e-05	0.141342
2263	FGFR2	7936734	2334.82	0.0461015	332.648	0.000441172	0.142473
23150	FRMD4B	8088745	2263.98	0.0317708	329.227	2.93271e-05	0.14542
9586	CREB5	8131996	1732.81	0.0187471	252.56	0.00255912	0.145752
26786	SNORD62A	8158864	777.576	0.0230725	115.038	0.000544636	0.147945
26786	SNORD62A	8158862	777.576	0.0230725	115.038	0.000544636	0.147945
2254	FGF9	7967993	2027.74	0.0393058	308.411	0.0168142	0.152096
677798	SNORA9	8139456	906.611	0.00829086	144.928	9.52787e-05	0.159857
64762	FAM59A	8022803	1187.88	0.00387189	193.867	0.000528692	0.163205
140883	ZNF280B	8074845	1610.97	0.0226905	267.798	0.0011467	0.166234
23261	CAMTA1	7897339	2072.17	0.00650854	349.727	0.000255071	0.168774
6082	SNORD20	8059710	3298.62	0.0182502	568.587	0.000118682	0.172371
7852	CXCR4	8055465	728.213	0.000386685	127.267	0.00305696	0.174767
57556	SEMA6A	8113666	1727.82	0.0238521	302.196	0.00152016	0.1749
55636	CHD7	8146579	2255.52	0.00927919	400.292	0.00636525	0.177473
677835	SNORA56	8170992	1258.29	0.00619749	238.406	4.26263e-05	0.189468
9495	AKAP5	7975066	1731.74	0.00108023	329.624	0.00313273	0.190343
79733	E2F8	7947110	1275.7	0.0148423	250.425	0.000261676	0.196304
3164	NR4A1	7955589	944.519	0.0086696	188.948	0.000445864	0.200047
84879	MFSD2A	7900365	1118.78	0.0248609	224.826	3.4242e-05	0.200955
388796	LOC388796	8066254	200.098	5.2126e-08	40.403	1.11095e-05	0.201916
9771	RAPGEF5	8138504	2149.61	0.0288894	436.644	0.00305163	0.203127
6875	TAF4B	8020702	1655.37	0.00954738	338.656	0.00777703	0.204581
22995	CEP152	7988537	1720.83	0.00959589	352.53	0.013572	0.20486
54101	RIPK4	8070489	941.673	0.00462885	193.023	5.34216e-06	0.204979
25805	BAMBI	7926875	416.218	1.473e-05	85.3379	1.12037e-05	0.205032
8972	MGAM	8136662	3931.79	0.0245859	838.756	0.000575078	0.213327
84865	CCDC142	8053171	1112.17	0.0349627	238.025	0.000527935	0.214018
9935	MAFB	8066266	1394.87	0.043617	298.552	0.00235978	0.214035
10392	NOD1	8138842	2119.14	0.0129965	461.735	0.000106071	0.217887
100132948	FAM27C	8155497	925.746	0.0252585	202.478	5.15093e-05	0.218719
6863	TAC1	8134420	1953.52	0.0250862	429.871	0.0294276	0.22005
7855	FZD5	8058498	1759.94	0.0217808	390.513	0.00111913	0.22189
84250	ANKRD32	8113124	2715.23	0.0132361	611.155	0.0214567	0.225084
729830	FAM160A1	8097801	1669.88	0.0343487	379.086	0.0368415	0.227014
407050	MIR93	8141421	1648.16	0.0261276	375.556	0.000602953	0.227864
221400	TDRD6	8120082	3785.96	0.0399053	865.457	3.08215e-05	0.228597
548321	FAM27A	8161503	925.746	0.0252585	213.029	5.8519e-05	0.230116
548321	FAM27A	8155510	925.746	0.0252585	213.029	5.8519e-05	0.230116
8798	DYRK4	7953229	1490.93	0.03625	343.312	7.24955e-05	0.230266
283726	FAM154B	7985398	1314.03	0.0248853	303.296	0.00167208	0.230814
58480	RHOU	7910387	720.053	0.0125397	166.417	0.000104309	0.231118
1870	E2F2	7913644	1863.06	0.0417061	430.893	0.0024924	0.231282
23266	LPHN2	7902565	1295.16	0.0271453	300.081	0.00111603	0.231694
1942	EFNA1	7905929	1233.5	0.00587499	290.126	0.000152223	0.235205
29909	GPR171	8091503	3268.75	0.0210675	769.479	2.73293e-05	0.235405
100131581	LOC100131581	8144701	1301.01	0.0127474	306.624	0.00174067	0.235682
116937	SNORD83A	8076221	1029.52	0.0113236	244.212	8.31101e-06	0.23721
10024	TROAP	7955195	578.327	0.00290276	137.437	0.000436208	0.237645
27063	ANKRD1	7934979	1068.74	0.0213065	255.613	0.0361758	0.239171
65999	LRRC61	8137215	847.174	0.0342332	203.259	0.00173436	0.239926
55805	LRP2BP	8103986	1678.86	0.0139571	406.921	0.00169842	0.242379
199953	TMEM201	7897469	1382.03	0.0446806	339.459	0.00945935	0.245624
6749	SSRP1	7948211	1456.09	0.0124972	362.737	4.98184e-06	0.249117
26053	AUTS2	8133233	1365.93	0.00446083	345.401	0.000526713	0.252868
100132147	LOC100132147	7898407	2180.83	0.0114157	552.889	0.00027809	0.253522
80318	GKAP1	8162006	2415.8	0.0086083	612.749	0.0452269	0.253642
4744	NEFH	8072229	1048.24	0.0160495	270.091	0.00384706	0.257661
1849	DUSP7	8087833	371.343	0.024052	96.0198	0.000832267	0.258574
79992	C6orf59	8130641	1558.07	0.0348094	403.452	0.000131483	0.258943
85376	RIMBP3	8074593	1173.51	0.0202838	303.982	0.000615987	0.259036
478	ATP1A3	8037079	725.819	0.00561231	188.751	0.00208109	0.260053
10432	RBM14	7941707	805.325	0.00499779	210.608	3.04462e-05	0.261519
144132	DNHD1	7938133	1126.01	0.0196307	295.499	0.000132761	0.26243
128346	C1orf162	7903980	1513.61	0.00451882	400.841	0.000654538	0.264825
5629	PROX1	7909681	2068.44	0.0356102	552.433	0.012876	0.267077
221711	SYCP2L	8116874	1836.76	0.00403894	491.689	0.0118712	0.267695
151230	KLHL23	8046186	1474.85	0.0395179	395.034	0.00905993	0.267846
112939	NACC1	8026155	720.904	0.0444112	193.964	0.00466261	0.269056
26809	SNORD42A	8005955	829.964	0.0189187	224.704	0.000185826	0.270739
677811	SNORA28	7977075	1033.32	0.00160119	281.904	4.83748e-05	0.272813
3607	FOXK2	8010820	419.996	0.0310606	114.626	0.00180346	0.272922
7608	ZNF56	8027239	3431.61	0.0354007	936.601	0.000247441	0.272933
113179	ADAT3	8024356	609.691	0.00630672	166.869	0.00036347	0.273694
9673	SLC25A44	7906128	644.11	0.0122652	176.576	0.000567875	0.274139
1824	DSC2	8022711	1812.43	0.0140026	501.265	0.0219323	0.276572
1663	DDX11	7954655	1241.2	0.0450271	343.364	0.00137022	0.276638
23152	CIC	8029193	561.98	0.0432167	156.466	0.00275396	0.278419
10560	SLC19A2	7922162	768.252	0.00349285	214.28	0.000441793	0.278919
3239	HOXD13	8046524	614.156	0.0277323	172.454	0.00129413	0.280798
114821	SCAND3	8124594	1634.43	0.0389515	459.283	0.000140843	0.281006
442590	SPDYE5	8133654	918.991	0.0250316	258.553	0.000833161	0.281344
113263	GLCCI1	8131496	733.238	0.0453741	207.326	0.000886607	0.282754
2861	GPR37	8142687	1354.95	0.0339242	388.289	4.64834e-05	0.28657
53944	CSNK1G1	7989657	902.308	0.0094657	259.232	7.77086e-05	0.287299
284071	C17orf104	8007643	1758.22	0.00528766	508.45	0.027671	0.289185
25961	NUDT13	7934299	825.356	0.0390254	239.274	2.20359e-06	0.289905
113115	FAM54A	8129763	776.942	0.00782192	225.553	0.000141693	0.290308
84978	FRMD5	7988260	1890.06	0.0337119	556.743	0.004063	0.294564
23493	HEY2	8121850	1098.11	0.0204603	324.459	0.0048792	0.295471
442075	LOC442075	8077728	962.353	0.00909922	284.742	0.0040955	0.295881
100129884	LOC100129884	7971965	1465.2	0.00462367	435.271	0.000933783	0.297073
54821	ERCC6L	8173506	1107.58	9.44385e-05	329.128	0.00322438	0.297158
3798	KIF5A	7956488	1778.83	0.016107	530.184	0.00195172	0.298053
51604	PIGT	8066528	2076.3	0.0301272	618.972	0.00153685	0.298113
23551	RASD2	8072705	1404.76	0.0227836	418.79	0.000385463	0.298123
57639	CCDC146	8133770	1987.42	0.0492325	593.32	0.00361262	0.298537
161725	OTUD7A	7982294	1135.19	0.0265684	340.017	0.000197164	0.299523
6526	SLC5A3	8068361	718.802	0.0433642	215.428	0.000301201	0.299705
388730	TMEM81	7923707	1892.94	0.000845055	569.824	0.00339979	0.301026
7536	SF1	7949146	420.114	0.0115182	126.744	0.000323743	0.30169
3708	ITPR1	8077376	1544.7	0.0292572	466.283	0.000231259	0.301859
7074	TIAM1	8069880	1448.68	0.0179325	438.033	0.00393546	0.302366
151009	LOC151009	8044346	698.678	0.0041808	211.312	0.00042067	0.302446
85376	RIMBP3	8074771	1176.62	0.0150227	357.676	0.000781323	0.303987
100133280	LOC100133280	8112519	861.981	0.00207432	262.575	0.000116882	0.304618
100133280	LOC100133280	8105987	900.707	0.00191735	274.754	0.000225692	0.305042
146909	KIF18B	8016139	881.888	0.0412074	270.809	0.0109464	0.307078
26504	CNNM4	8043657	992.402	0.0222502	305.171	0.00759805	0.307508
57643	ZSWIM5	7915682	1886.81	0.0499829	580.459	0.020646	0.307639
677771	SCARNA4	7920875	1293.62	1.03448e-06	398.604	3.26222e-05	0.308132
2886	GRB7	8006940	1346.9	0.0308023	416.567	0.000614676	0.309279
2122	MECOM	8091991	2533.18	0.032194	784.164	0.00266935	0.309558
139411	PTCHD1	8166447	1690.68	0.0284683	528.811	0.000226205	0.31278
2842	GPR19	7961381	1416.79	0.0159806	447.778	0.00344954	0.316051
441308	OR4F21	8148962	2418.15	0.0172688	764.719	1.92989e-05	0.316241
391	RHOG	7945944	426.794	0.0434446	135.176	0.000167467	0.316723
346157	ZNF391	8117572	2381.92	0.0427667	755.508	0.00117623	0.317185
26082	DKFZP434L187	7982252	1215.91	0.0175304	386.896	0.000777486	0.318194
150590	C2orf15	8043835	2040.97	0.00301875	651.021	0.0065945	0.318976
286006	C7orf53	8135532	2543.81	0.0418927	813.374	0.00213891	0.319747
9208	LRRFIP1	8049528	554.757	0.00228536	178.668	0.000271162	0.322065
406890	MIRLET7G	8087881	1714.18	0.00516885	552.476	2.81481e-06	0.322297
10485	C1orf61	7921003	1180.07	0.00262356	381.465	0.000700988	0.323257
79845	RNF122	8150186	453.91	0.000680324	147.394	0.000109854	0.32472
375133	PI4KAP2	8074577	592.329	0.043457	193.833	0.000136934	0.327239
133522	PPARGC1B	8109179	1394.5	0.0487547	456.501	0.00416468	0.327357
692076	SNORD7	8006540	1869.59	0.0214788	613.6	0.00187997	0.328201
56896	DPYSL5	8040725	1837.83	0.0216593	604.957	0.031054	0.329169
23117	NPIPL3	8000205	539.949	0.0282257	178.229	0.000424726	0.330086
113457	TUBA3D	8045291	1168.16	0.0403287	386.999	0.00121669	0.331288
10793	ZNF273	8133062	1457.41	0.0480898	484.505	0.0152813	0.332441
136	ADORA2B	8005134	644.329	0.0221249	214.407	0.0001178	0.33276
64837	KLC2	7941565	650.257	0.0411487	216.392	0.00704834	0.332779
8567	MADD	7939767	398.402	0.000506658	132.647	0.000183126	0.332946
9304	SNORD22	7948896	491.194	5.57323e-05	164.096	8.1711e-06	0.334075
345062	PRSS48	8097794	1435.33	0.0296787	479.564	0.000393198	0.334115
26776	SNORA71B	8066256	430.175	0.0056275	144.083	0.000168338	0.334942
57649	PHF12	8013812	234.358	0.000293279	78.5764	0.000235659	0.335283
644815	FAM83G	8013312	768.542	0.0287964	257.73	7.7062e-05	0.335349
81399	OR4F16	8110672	2154.71	0.00947152	723.749	1.43683e-05	0.335891
81399	OR4F16	7896744	2154.71	0.00947152	723.749	1.43683e-05	0.335891
81399	OR4F16	7911345	2154.71	0.00947152	723.749	1.43683e-05	0.335891
6542	SLC7A2	8144786	1523.51	0.0195193	513.505	0.0304573	0.337054
574042	SNORA10	8041204	628.735	0.014942	211.918	0.00325327	0.337055
574042	SNORA10	7998664	628.735	0.014942	211.918	0.00325327	0.337055
785	CACNB4	8055872	1610.77	0.0443237	543.757	0.0043454	0.337577
374291	NDUFS7	8032212	702.455	0.0224732	237.374	0.000127014	0.337921
51747	LUC7L3	8008493	422.467	0.00398753	142.967	2.25257e-06	0.338411
127602	DNAH14	7910054	2163.69	0.00371952	732.241	0.000566197	0.338422
8940	TOP3B	8074817	610.731	0.00633685	207.145	0.000923518	0.339176
10432	RBM14	7941702	732.2	0.00306099	248.43	2.87466e-05	0.339292
1638	DCT	7972259	2030.99	0.0147797	689.808	0.00309639	0.339641
100129396	FAM106C	8005231	726.586	0.000280627	247.616	1.68804e-06	0.340793
116113	FOXP4	8119444	771.858	0.0284899	263.074	0.0143558	0.340832
55432	YOD1	7909283	789.149	0.00761162	269.176	0.0125888	0.341096
6943	TCF21	8122176	781.963	0.00350166	268.461	2.67276e-05	0.343317
100131997	FAM27E3	8161446	729.279	0.000745429	250.617	8.2632e-05	0.343651
399909	PCNXL3	7941350	706.424	0.0469019	242.85	0.00472246	0.343773
100133280	LOC100133280	8105935	1002.85	0.0431204	347.61	0.00153556	0.346622
677813	SNORA30	7994926	1264.4	0.00608901	438.376	0.000125817	0.346706
3122	HLA-DRA	8118548	2683.29	0.0196626	934.337	0.0278021	0.348206
4969	OGN	8162373	2294.17	0.0307467	799.429	0.000414101	0.348462
55527	FEM1A	8024898	612.741	0.00859179	213.683	0.000410325	0.348732
80039	FAM106A	8005687	687.97	0.00033354	239.947	6.39959e-07	0.348775
80169	C17orf68	8012423	702.436	0.0347307	247.013	0.000986922	0.351652
63027	SLC22A23	8123658	1210.18	0.0277879	427.123	0.00250323	0.352943
283571	PROX2	7980213	1569.76	0.0222313	555.365	0.000323663	0.35379
100129112	LOC100129112	8017344	540.104	0.000227151	191.431	4.67288e-06	0.354433
1993	ELAVL2	8160459	1912.89	0.00421159	679.639	0.000813681	0.355294
7976	FZD3	8145611	1910.09	0.00378807	678.656	0.0358619	0.3553
84807	NFKBID	8036207	1354.83	0.00996482	481.54	0.00117506	0.355425
7090	TLE3	7990033	559.102	0.0108409	199.33	0.000914912	0.356518
55605	KIF21A	7962274	1932.05	0.00793662	689.435	0.0472565	0.356841
81620	CDT1	7997839	732.906	0.00850263	261.99	0.0130272	0.357467
337975	KRTAP20-1	8068154	2427.74	0.0102424	870.325	0.000784381	0.358491
84726	BAT2L1	8158839	535.408	0.0113859	192.012	0.00174179	0.358628
55609	ZNF280C	8175076	446.412	0.000508156	160.55	0.000544146	0.359646
23117	NPIPL3	7994026	560.478	0.0345827	201.58	0.000544122	0.359658
9148	NEURL	7930264	1046.83	0.02699	377.305	0.0222308	0.360427
23117	NPIPL3	8000131	546.091	0.0358445	196.932	0.000629414	0.360622
100129484	LOC100129484	8137962	796.275	0.040422	288.545	0.0013577	0.362369
11120	BTN2A1	8117485	875.327	0.0481254	317.393	0.00216729	0.3626
84930	MASTL	7926821	827.684	0.00938748	300.302	0.00266	0.362822
283659	PRTG	7989073	848.442	0.00211329	307.925	0.0113043	0.36293
23360	FNBP4	7947969	632.581	0.0221778	229.845	0.000113868	0.363345
3400	ID4	8117120	693.341	0.00918405	251.944	0.00897721	0.363377
4487	MSX1	8093852	749.093	0.00102373	272.593	0.000394058	0.363898
80039	FAM106A	8013268	688.137	0.000522792	250.699	3.16489e-06	0.364315
440362	HERC2P4	8001067	565.009	0.0460523	205.932	0.00025696	0.364475
84250	ANKRD32	8106931	1959.09	0.00619823	715.69	0.0226859	0.365317
79836	LONRF3	8169603	1613.23	0.0139426	589.896	0.00881834	0.365661
28968	SLC6A16	8038326	1602.44	0.0313794	586.367	0.0081993	0.365922
57673	BEND3	8128620	867.091	0.00348044	318.153	0.000998597	0.36692
692197	SNORD77	7922412	780.603	0.000118283	287.379	7.60008e-06	0.368151
128312	HIST3H2BB	7910369	784.498	0.00116178	289.167	0.000528367	0.368601
8521	GCM1	8127130	2092.51	0.0284014	773.375	0.00426224	0.369592
23158	TBC1D9	8102912	790.294	0.0373875	292.211	0.00209003	0.36975
22889	KIAA0907	7920852	808.609	0.0346438	299.584	6.36723e-05	0.370493
79774	GRTP1	7972890	1061.03	0.032496	393.376	0.000312898	0.37075
152926	PPM1K	8101701	1205.78	0.0296166	447.393	0.0017779	0.371039
91752	ZNF804A	8046815	661.162	0.00132134	245.667	3.29666e-05	0.371569
58516	FAM60A	7962146	888.541	0.0193394	330.192	0.0128286	0.371611
91694	LONRF1	8149399	622.327	0.00163449	231.373	0.000468324	0.371787
4992	OR1F1	7992863	872.204	0.0161371	325.147	0.000340673	0.372788
11070	TMEM115	8087685	450.916	0.00816895	168.463	0.000525283	0.373602
55795	PCID2	7972888	397.583	0.000688895	148.688	1.89451e-05	0.373981
256435	ST6GALNAC3	7902425	2151.94	0.0336714	804.965	0.0343969	0.374066
1602	DACH1	7971950	1309.56	0.0221194	490.899	0.00449653	0.374857
347273	MURC	8156919	1351.75	0.0241937	507.972	0.00678693	0.375788
374666	WASH3P	8031981	566.287	0.00397718	213.489	0.000201953	0.376999
54058	C21orf58	8071020	1378.79	0.017249	520.579	0.00595001	0.377562
8586	OR7E87P	7949896	1249.13	0.0402523	471.627	0.00216017	0.377564
4774	NFIA	7901788	961.597	0.0186058	364.222	0.000899955	0.378768
259289	TAS2R43	7961295	1614.55	0.00998769	611.657	0.000154836	0.37884
221545	C6orf136	8117987	871.383	0.0373549	330.81	0.000888989	0.379638
219293	ATAD3C	7896937	1276.61	0.0332775	485.132	0.000354109	0.380017
121268	RHEBL1	7963009	932.208	0.00344455	354.397	4.52469e-05	0.38017
10847	SRCAP	7994889	319.39	0.000683948	121.975	0.0019656	0.381902
79831	JMJD5	7994269	1014.7	0.0343522	387.656	0.000272495	0.382042
30811	HUNK	8068180	914.87	0.00441572	349.817	0.000115749	0.382368
9510	ADAMTS1	8069676	343.018	0.000451785	131.184	0.000104339	0.382442
353497	POLN	8098958	850.113	0.0159006	325.433	0.00182657	0.382811
1995	ELAVL3	8034263	1514.56	0.0164055	581.699	0.00454278	0.384071
375133	PI4KAP2	8074748	624.444	0.0269141	239.836	9.96547e-05	0.38408
150864	FAM117B	8047565	924.778	0.0120967	356.064	0.00289097	0.385026
5813	PURA	8108472	583.728	0.00702435	224.917	0.000379982	0.385312
128553	TSHZ2	8063437	1703.1	0.00952987	656.55	0.00407113	0.385503
10040	TOM1L1	8008564	805.28	0.0068047	310.491	0.000378703	0.385568
2178	FANCE	8118963	853.092	0.0178958	329.099	0.00303418	0.385772
10733	PLK4	8097356	725.512	0.0169851	279.972	0.000910246	0.385896
84446	BRSK1	8031441	1024.73	0.0304768	397.11	0.00182327	0.387527
5980	REV3L	8128894	582.893	0.00569158	226.08	2.51326e-05	0.387859
100131997	FAM27E3	8161499	621.881	0.000321815	241.306	0.000168669	0.388026
54206	ERRFI1	7912157	481.016	0.00302712	187.163	1.27154e-06	0.389099
2066	ERBB4	8058627	1812.48	0.0119003	706.242	0.00136109	0.389655
6160	RPL31	8043932	715.566	0.033286	279.57	0.0103109	0.390697
79915	ATAD5	8006187	845.887	0.00191954	330.573	0.0089284	0.3908
79716	NPEPL1	8063650	916.135	0.048205	358.325	0.000688644	0.391127
5314	PKHD1	8126954	4164.79	0.0265743	1630.7	0.000312301	0.391543
23086	EXPH5	7951545	1706.13	0.00755049	669.676	0.0213507	0.392511
56905	C15orf39	7984952	280.188	0.000231251	109.995	0.000408157	0.392575
283652	SLC24A5	7983553	1613.45	0.0050575	633.655	0.00438626	0.392733
127396	ZNF684	7900461	1261.31	0.00446642	495.367	0.000381066	0.392741
3054	HCFC1	8175947	501.161	0.0190339	196.829	0.018552	0.392747
60386	SLC25A19	8018352	1180.06	0.0326031	464.054	5.01159e-05	0.393247
100131997	FAM27E3	8155514	660.509	0.00106941	259.967	0.000162265	0.393586
440081	DDX12	7953844	1142.42	0.0354414	449.764	0.00290663	0.393695
57519	STARD9	7983143	1020.46	0.0102212	401.875	0.00395329	0.393816
51330	TNFRSF12A	7992789	510.672	0.0284007	201.24	0.00103249	0.39407
84848	MGC16121	8175256	398.133	0.00498664	157.709	0.000286791	0.396122
405754	ERVFRDE1	8123929	1843.06	0.0161247	732.197	0.000920741	0.397271
9639	ARHGEF10	8144315	924.721	0.00788147	367.384	0.000182016	0.397292
2256	FGF11	8004408	1693.41	0.0145147	674.055	0.0248119	0.398045
2810	SFN	7899265	1240.04	0.0381069	495.082	0.00306674	0.399246
100132005	LOC100132005	8119237	1529.07	0.0299018	611.181	0.000850323	0.399708
51720	UIMC1	7911343	494.026	0.041278	197.468	0.000183123	0.399712
51720	UIMC1	8165703	494.026	0.041278	197.468	0.000183123	0.399712
1043	CD52	7899160	1932.98	0.0416497	772.653	0.00631873	0.399721
23049	SMG1	8000167	531.197	0.00814756	212.375	7.28323e-05	0.399805
80772	GLTPD1	7896917	665.388	0.0108564	266.331	0.00155478	0.400264
57721	METTL14	8097066	1054.08	0.0499492	422.672	0.00685231	0.400986
7092	TLL1	8098214	1678.61	0.0312776	675.853	0.00120616	0.402628
220001	VWCE	7948511	1012.09	0.0196312	407.756	0.000678574	0.402884
26034	IPCEF1	8130408	2094.97	0.0273516	844.351	0.00380001	0.403037
23031	MAST3	8026926	880.893	0.0398632	355.051	0.00284559	0.403058
3034	HAL	7965606	1660.02	0.00753778	671.277	0.000103493	0.404379
162632	LOC162632	8005225	688.952	0.0446452	279.201	0.00787673	0.405255
84946	LTV1	8122440	654.368	0.0111835	265.327	0.00748904	0.405471
256309	CCDC110	8104014	2955.73	0.039673	1199.2	0.0091678	0.405719
92070	C4orf42	8093456	624.912	0.00876665	254.028	0.000375204	0.406502
4929	NR4A2	8055952	803.265	0.00207569	327.143	0.000117109	0.407267
11064	CEP110	8157534	1733.61	0.016091	707.133	0.0199819	0.407896
9278	ZBTB22	8125731	775.379	0.0465711	316.572	0.00114904	0.408281
80035	C15orf28	7990027	636.8	0.000630059	260.462	0.000426405	0.409017
80131	LRRC8E	8025347	901.948	0.00293906	369.396	0.000279114	0.409553
9374	PPT2	8118509	862.778	0.0443927	353.483	0.000124964	0.409703
26774	SNORD80	7922404	357.172	1.46628e-06	146.381	0.00168466	0.409833
196913	C14orf183	7978917	1341.7	0.0125676	552.242	8.43241e-05	0.411598
23117	NPIPL3	8022320	292.706	0.000457807	120.657	0.000103743	0.412212
113130	CDCA5	7949364	1034.86	0.0446677	427.217	0.00233312	0.412826
57476	GRAMD1B	7944769	680.861	0.0321726	281.587	0.00011149	0.413574
83539	CHST9	8022666	2126.51	0.0105661	879.631	0.0302096	0.41365
4324	MMP15	7996185	976.939	0.041451	404.874	0.00565416	0.414431
26707	OR2J2	8117716	2648.55	0.0190604	1098.23	0.00139304	0.414653
26707	OR2J2	8177696	2648.55	0.0190604	1098.23	0.00139304	0.414653
164832	LONRF2	8054281	1504.01	0.0168784	623.79	0.0480952	0.414751
56977	STOX2	8098549	676.832	0.000282646	280.944	0.000338202	0.415087
3949	LDLR	8025828	289.702	0.00031755	120.555	1.15452e-05	0.416135
26135	SERBP1	7916836	1019.09	0.0159012	424.955	0.0269098	0.416995
4436	MSH2	8041867	874.858	0.0305875	365.63	0.0296001	0.41793
55478	PRO2012	7924817	295.661	1.34718e-05	123.609	1.27189e-05	0.418079
7707	ZNF148	8090237	592.438	0.0322888	248.444	0.000416963	0.419358
171017	ZNF384	7960666	618.179	0.0312037	259.649	0.00632287	0.420022
162655	ZNF519	8022420	1262.94	0.00360523	530.522	0.00924106	0.420068
55015	PRPF39	7974146	645.686	0.0165641	271.465	0.000570559	0.420428
84057	MND1	8097857	1162.37	0.0345785	488.851	0.0364647	0.420563
338799	LOC338799	7967210	555.682	0.000672005	233.744	0.00141506	0.420644
158399	ZNF483	8157193	1124.73	0.0171507	473.819	0.0164991	0.421272
3223	HOXC6	7955873	754.678	0.00214873	318.216	0.00230211	0.421659
388022	LOC388022	7977270	453.8	0.00735071	191.385	0.000581898	0.421739
7182	NR2C2	8078091	484.417	0.00402115	204.311	0.00145782	0.421766
221545	C6orf136	8179167	763.94	0.0132118	322.462	0.000467809	0.422104
221545	C6orf136	8177851	763.94	0.0132118	322.462	0.000467809	0.422104
80174	DBF4B	8007673	489.277	0.00332915	206.833	0.00276608	0.422733
8470	SORBS2	8104035	1798.63	0.0175446	760.481	0.0115014	0.422812
149685	ADIG	8062527	1437.81	0.022981	608.171	0.00228661	0.422983
57685	CACHD1	7901993	662.694	0.0311919	280.458	0.00262365	0.423209
204851	HIPK1	7904137	653.09	0.0335633	276.474	0.0193189	0.423333
204	AK2	7914617	800.99	0.0200711	339.127	0.000490955	0.423384
642477	FLJ39632	7977452	958.365	0.0396783	405.822	0.00140488	0.423453
6536	SLC6A9	7915543	810.666	0.0456229	343.388	0.00445699	0.423587
55082	ARGLU1	7972723	426.517	0.000180607	180.716	0.000343981	0.423701
57519	STARD9	7983132	975.535	0.0118931	413.381	0.00143199	0.423748
1951	CELSR3	8087145	920.867	0.0284426	390.382	0.000510168	0.423929
728430	FAM90A20	8144388	2032.46	0.0308536	862.282	0.00239629	0.424255
55534	MAML3	8102862	606.321	0.00132456	257.267	0.000456963	0.424308
100379132	SNORA70G	7964830	617.587	0.000574714	262.085	0.00011435	0.424369
80764	THAP7	8074688	750.08	0.00485201	318.546	0.000474059	0.424682
7486	WRN	8145702	1020.57	0.0142142	433.638	0.0302189	0.424896
9099	USP2	7952249	1253.6	0.000945155	532.747	0.0037904	0.424973
79618	HMBOX1	8145636	913.752	0.028974	388.799	0.011166	0.425497
9953	HS3ST3B1	8005097	670.152	0.0140747	285.4	0.00286185	0.425874
9994	CASP8AP2	8121118	749.879	0.0108564	319.503	0.00624774	0.426073
26785	SNORD63	8114468	1203.22	0.000223144	513.113	0.00116824	0.42645
283932	NCRNA00095	8000957	1049.61	0.000688323	447.627	0.00128028	0.426468
22976	PAXIP1	8144047	972.009	0.0440488	415.369	0.00763604	0.42733
1789	DNMT3B	8061746	1114.35	0.013986	476.257	0.0126921	0.427385
197320	ZNF778	7997896	676.001	0.000831436	289.506	1.61353e-05	0.428263
32	ACACB	7958466	1487.99	0.0138217	637.569	0.00324673	0.428476
200734	SPRED2	8052689	341.479	9.84821e-05	146.324	0.000132212	0.428501
55787	TXLNG	8166230	717.076	0.0173145	307.435	0.00543456	0.428734
9479	MAPK8IP1	8016261	905.461	0.0346754	388.451	0.00529172	0.42901
137868	SGCZ	8149438	1775.59	0.0158743	762.37	9.78219e-05	0.429361
8844	KSR1	8005785	577.635	0.00719981	248.109	0.000882739	0.429526
100141515	C17orf99	8010237	910.336	0.0384541	391.207	0.00138312	0.429739
129138	ANKRD54	8075971	571.411	0.00250796	245.943	0.00053198	0.430413
23117	NPIPL3	8000676	517.017	0.0290176	222.817	0.000846827	0.430966
127703	C1orf216	7914847	812.817	0.0142983	350.391	0.00665193	0.431082
442186	OR2J3	8117714	1589.15	0.0313578	685.186	4.47359e-05	0.431164
783	CACNB2	7926506	1541.83	0.012383	665.278	0.0023055	0.431487
23013	SPEN	7898278	473.237	0.00806992	204.226	0.000789287	0.431551
463	ZFHX3	8002692	722.878	0.0172093	311.964	0.0019016	0.431558
84318	CCDC77	7952914	817.33	0.032309	352.746	0.00470403	0.431583
5187	PER1	8012349	423.025	0.000115713	182.666	0.00105174	0.43181
677794	SNORA2B	7962829	1191.17	0.000257583	514.928	0.000402698	0.432288
84570	COL25A1	8102263	1693.07	0.0259445	732.419	0.00423279	0.432598
283232	TMEM80	7937438	480.422	0.0265162	208.111	0.00138678	0.433184
5228	PGF	7980233	720.691	0.003714	312.501	0.00205283	0.433613
8085	MLL2	7962951	496.541	0.0114376	215.821	0.0033376	0.434649
84629	TNRC18	8137953	718.158	0.0443067	312.675	0.00503281	0.435384
164656	TMPRSS6	8072796	1464.53	0.0424854	638.34	0.00596666	0.435866
805	CALM2	8052010	491.501	0.0452469	214.659	0.000338403	0.436742
84172	POLR1B	8044473	553.271	0.00266861	241.654	9.09697e-05	0.436773
51742	ARID4B	7925201	578.599	0.00452456	252.803	0.00225161	0.436923
378465	HSN2	7952986	516.072	0.00614944	225.945	3.13263e-05	0.437816
165679	C3orf57	8091799	2412.43	0.0196829	1056.34	0.00683116	0.437873
143872	ARHGAP42	7943349	858.867	0.0129257	377.14	0.000203043	0.439113
55558	PLXNA3	8170921	663.626	0.0445937	291.605	0.0100131	0.439412
286749	STON1-GTF2A1L	8041940	1317.12	0.0432114	579.252	0.00307564	0.439786
415116	PIM3	8073960	311.283	0.000141012	136.99	5.72763e-05	0.440081
10044	SH2D3C	8164252	1006.56	0.0454816	443.147	0.000478365	0.440258
84798	C19orf48	8038624	718.813	0.00211973	316.523	0.000341879	0.440341
285955	SPDYE1	8140424	604.803	0.00755077	266.373	0.00123784	0.440429
83551	TAAR8	8122129	2212.81	0.00183255	975.114	0.00382472	0.440669
677812	SNORA29	8130580	864.877	0.000271289	381.524	5.13873e-05	0.441131
285126	DNAJC5G	8040889	2120.41	0.0379014	935.404	0.0012373	0.441144
25818	KLK5	8038670	1119.8	0.0444916	494.214	0.00211011	0.441343
26796	SNORD53	8041168	329.035	8.93437e-05	145.762	7.50266e-07	0.442997
91748	C14orf43	7975626	1060.39	0.0438701	469.81	0.00820368	0.443053
283518	KCNRG	7969166	703.066	0.00189404	311.658	0.000182887	0.443285
8438	RAD54L	7901192	1022.12	0.0183642	453.375	0.00202673	0.443563
729975	FLJ30403	8030838	1415.87	0.048658	628.438	8.70621e-05	0.443853
83591	THAP2	7957161	1862.99	0.0226311	826.968	0.00346178	0.443893
63977	PRDM15	8070503	1162.58	0.0195399	516.194	0.00191029	0.444008
440519	ZNF724P	8035838	797.978	0.0479148	354.435	0.0368632	0.444166
80772	GLTPD1	8039937	607.256	0.0115621	270.033	0.0010116	0.444676
59284	CACNG7	8031076	1309.29	0.0330253	583.493	0.00500681	0.445656
80174	DBF4B	8007651	1091.06	0.0180607	486.272	0.00772945	0.445687
51143	DYNC1LI1	8086008	676.154	0.0325781	301.53	0.000898702	0.445948
54617	INO80	7987584	361.36	0.00111112	161.318	2.70545e-06	0.44642
51460	SFMBT1	8088065	1181.14	0.023068	527.521	0.00728952	0.446621
100133280	LOC100133280	8105989	803.338	0.0243227	359.452	0.00165961	0.447448
125931	CEACAM20	8037482	1598.04	0.0276871	718.352	0.00365944	0.449522
150223	YDJC	8074773	713.583	0.0313797	320.898	0.00195047	0.4497
284194	LGALS9B	8013450	1106.81	0.0419023	498.296	0.00142044	0.45021
54429	TAS2R5	8136647	1407.1	0.0120739	634.269	0.000762826	0.450762
677822	SNORA40	8045423	1170.07	0.0244118	528.77	0.000136162	0.451914
54880	BCOR	8172088	347.06	1.27192e-05	156.894	8.60211e-05	0.452066
7166	TPH1	7946946	3683.4	0.00992256	1667.01	0.0220086	0.452574
100132288	LOC100132288	8071044	509.109	0.00114738	230.529	0.000339234	0.452809
5091	PC	7949719	569.839	0.0338469	258.052	0.00918581	0.45285
84302	C9orf125	8162902	825.486	0.0455855	374.041	0.00053795	0.453116
285955	SPDYE1	8132531	502.427	0.00772886	227.868	0.0004887	0.453534
55844	PPP2R2D	7931405	588.056	0.00968253	266.767	0.000838957	0.453642
100133130	LOC100133130	7933572	974.441	0.00031453	442.199	3.0522e-05	0.453798
100133130	LOC100133130	7933261	974.441	0.00031453	442.199	3.0522e-05	0.453798
114130	MGC16384	7967636	376.736	0.000102585	171.196	7.96381e-06	0.454418
650	BMP2	8060850	641.409	0.00689181	291.492	0.00110481	0.454456
8140	SLC7A5	8003298	538.27	0.0190509	244.841	0.0116979	0.454867
285346	ZNF852	8079187	1209.33	0.0278019	550.3	0.0469979	0.455044
4330	MN1	8075126	1099.14	0.0436171	500.252	0.00463567	0.455131
79904	FLJ11710	8008700	840.761	0.00562224	383.142	3.91897e-06	0.455709
6263	RYR3	7982392	2423.83	0.0173125	1105.17	0.000146434	0.455958
6297	SALL2	7977761	782.773	0.00149794	356.936	0.00179577	0.455989
25854	FAM149A	8098620	1594.84	0.0234752	728.557	0.00768673	0.456822
4117	MAK	8123893	1788.23	0.00735898	817.563	0.00943595	0.457192
319089	C14orf25	7974008	2167.11	0.0378031	991.322	0.00124538	0.457441
10393	ANAPC10	8103005	651.566	0.0275737	298.415	0.0266352	0.457997
3212	HOXB2	8016438	1046.99	0.0476228	479.646	0.0168286	0.458119
3480	IGF1R	7986359	602.576	0.0232485	276.291	0.00112639	0.458516
1837	DTNA	8020847	782.88	0.00543891	359.277	0.00441381	0.458917
10748	KLRA1	7961198	1604.54	0.00114654	737.128	0.00584158	0.459401
401898	ZNF833	8025933	957.262	0.000464813	440.331	0.00106055	0.45999
11129	SFRS16	8029592	926.972	0.0296004	426.823	0.0238895	0.460449
65264	UBE2Z	8008139	628.253	0.0399642	289.526	0.00550945	0.460844
79834	SGK269	7990632	546.076	0.00484838	251.899	0.00401866	0.461289
283991	FAM100B	8010050	463.675	0.0270171	213.903	0.000573405	0.461321
645524	FLJ36840	8144228	569.482	0.000914374	262.86	5.23025e-05	0.461578
57553	MICAL3	8074286	749.785	0.0360449	346.232	0.000214339	0.461774
6083	SNORD21	7903022	302.451	0.000218444	139.792	0.000200976	0.462198
55731	C17orf63	8013776	333.134	0.00130525	154.217	0.00177845	0.462929
164380	CSTT	8061396	4099.9	0.0408959	1900.25	0.000881497	0.463487
93323	HAUS8	8035236	429.451	0.000210199	199.115	2.76049e-06	0.463651
51134	CCDC41	7965486	1554	0.0155934	720.751	0.0258011	0.463803
1958	EGR1	8108370	80.4199	7.47491e-06	37.3222	0.000753297	0.464092
5077	PAX3	8059301	568.943	0.000168881	264.391	4.05355e-05	0.464705
23130	ATG2A	7949277	632.424	0.00694753	294.317	0.00784291	0.465379
23506	KIAA0240	8119582	715.841	0.0162085	333.372	0.00016564	0.465706
29941	PKN3	8158380	885.327	0.0315383	412.357	0.0432733	0.465768
27141	CIDEB	7978272	1173.14	0.0316861	546.835	0.0280877	0.466131
91355	LRP5L	8075052	1138.73	0.0371548	530.863	0.000416603	0.466189
677820	SNORA38	8118207	476.425	0.000252594	222.182	0.000156121	0.466351
23082	PPRC1	7929990	236.652	2.94069e-06	110.398	3.58673e-05	0.4665
23024	PDZRN3	8088848	523.86	0.0316576	244.657	0.000275512	0.467027
9788	MTSS1	8152764	929.557	0.015017	434.134	0.00243987	0.467033
554249	LOC554249	8161451	1172.65	0.0419899	548.411	0.00391653	0.467667
554249	LOC554249	8155393	1172.65	0.0419899	548.411	0.00391653	0.467667
23126	POGZ	7920000	335.378	0.00375512	156.892	0.00184401	0.467805
64858	DCLRE1B	7904131	403.25	0.000291903	188.647	1.3283e-05	0.467816
285955	SPDYE1	8140454	625.366	0.00523731	292.705	0.0012125	0.468054
251	ALPPL2	8049128	1023.36	0.0318107	479.098	0.0117387	0.468162
54800	KLHL24	8084219	777.131	0.0251537	364.344	0.00548523	0.468832
84687	PPP1R9B	8016628	650.166	0.0191745	304.861	0.00324441	0.468897
90025	UBE2CBP	8127824	1207.73	0.00652596	566.652	0.00103087	0.469188
100128644	LOC100128644	8085429	1097.74	0.0280288	515.12	0.00242329	0.469254
339287	MSL1	8007023	287.036	0.00715802	134.706	0.00133344	0.4693
54805	CNNM2	7930194	620.188	0.0358241	291.21	0.000889756	0.469552
11108	PRDM4	7966072	607.837	0.0233117	285.49	0.000534434	0.469682
441251	SPDYE7P	8139943	842.855	0.0311699	395.908	0.0138301	0.469723
1948	EFNB2	7972713	512.936	0.00232463	241.062	4.30603e-05	0.469965
9882	TBC1D4	7972021	970.096	0.0462908	456.004	0.000871784	0.470061
80018	NAA25	7966462	886.371	0.0450798	417.021	0.00217347	0.470481
580	BARD1	8058695	820.359	0.0461652	386.096	0.000268276	0.470643
146712	B3GNTL1	8019559	1279.63	0.0443214	602.975	0.00199505	0.471212
6520	SLC3A2	7940717	484.617	0.0103327	228.4	3.4372e-05	0.4713
23239	PHLPP1	8021565	844.907	0.0157896	398.79	0.0016698	0.471992
286076	BREA2	8148671	996.962	0.00298046	470.657	4.54219e-05	0.472091
116225	ZMYND19	8165622	572.403	0.0173365	270.283	3.51754e-05	0.47219
26226	FBXW4P1	8071713	642.016	0.00192167	303.394	0.000215758	0.472565
9481	SLC25A27	8120067	1568.52	0.0479525	741.879	0.0326328	0.47298
25921	ZDHHC5	7940051	651.85	0.0342119	308.465	0.00035899	0.473215
84858	ZNF503	7934553	437.281	0.000191508	206.969	0.000762899	0.47331
782	CACNB1	8014794	717.886	0.0396216	340.631	0.00172443	0.474492
4435	CITED1	8173524	829.374	0.00291582	393.635	0.0343573	0.474617
442578	STAG3L3	8139977	451.372	0.00725115	214.324	0.000178663	0.474828
23049	SMG1	8000638	644.149	0.015029	305.866	0.00258531	0.474837
79937	CNTNAP3	8161288	2312.09	0.0146209	1097.9	0.00345758	0.474852
440452	TBC1D3P2	8017173	856.908	0.0409789	407.947	0.00289345	0.476068
79595	SAP130	8055104	412.696	0.016483	196.536	0.0111723	0.476226
79959	CEP76	8022380	1234.51	0.0254184	588.37	0.00753718	0.476603
63950	DMRTA2	7915991	689.343	0.00890109	328.619	0.000320124	0.476714
6125	RPL5	7903010	411.612	0.0113434	196.222	9.7633e-07	0.476716
11016	ATF7	7963698	801.188	0.0472506	383.059	0.0156121	0.478113
5129	CDK18	7909104	1107.23	0.0266448	529.608	0.0125453	0.47832
2498	FTHL3	8051133	326.615	0.000772858	156.281	0.000415239	0.478488
79970	ZNF767	8143733	653.97	0.00448708	312.979	0.000985704	0.478584
114880	OSBPL6	8046646	974.731	0.0376594	466.889	0.0161281	0.478993
197407	ZNF48	7994813	501.604	0.000272075	240.319	1.10921e-06	0.4791
63967	CLSPN	7914851	1172.58	0.0225113	561.783	0.0454163	0.4791
115584	SLC5A11	7994216	1217.45	0.00590079	585.034	0.00451761	0.48054
23135	KDM6B	8004671	745.618	0.00765609	358.388	0.00376201	0.480659
26707	OR2J2	8179005	2334.45	0.0120444	1123.27	0.00210911	0.481172
7701	ZNF142	8058973	499.266	0.00592079	240.658	0.00162305	0.482023
57332	CBX8	8019010	691.94	0.00692555	333.56	0.000269802	0.482065
220213	OTUD1	7926677	386.565	3.8626e-06	186.353	0.000518133	0.482074
54920	DUS2L	7996725	544.432	0.00254564	262.516	0.000891166	0.482183
79679	VTCN1	7918936	2276.15	0.0454037	1097.57	0.0235704	0.482208
79697	C14orf169	7975595	488.947	0.000516668	235.932	0.000111528	0.482531
56995	TULP4	8123044	520.558	0.018843	251.212	0.000538436	0.482583
124402	FAM100A	7999173	400.02	0.00813157	193.184	0.00757633	0.482936
406	ARNTL	7938563	755.474	0.00101403	364.892	0.000563595	0.482997
1577	CYP3A5	8141328	2128.02	0.0230161	1027.9	0.00734892	0.48303
133746	JMY	8106516	672.365	0.00971815	324.989	0.0029467	0.483352
23074	UHRF1BP1L	7965723	966.237	0.0342292	467.101	0.00439271	0.483423
688	KLF5	7969414	495.399	0.0482333	239.61	0.00186143	0.48367
84444	DOT1L	8024391	748.867	0.0019829	362.697	0.0113989	0.484328
479	ATP12A	7968062	3928.29	0.0489762	1903.52	0.0361151	0.484567
23162	MAPK8IP3	7992347	665.931	0.0229372	322.884	0.00488084	0.484861
54407	SLC38A2	7962537	351.055	4.14674e-05	170.217	1.17622e-05	0.484873
9757	MLL4	8027956	567.762	0.00481728	275.368	0.002039	0.485005
10766	TOB2	8076331	233.054	0.000160472	113.036	0.000239421	0.485019
59350	RXFP1	8098060	2379.29	0.0204097	1154.42	0.000416231	0.485194
7577	ZNF29P	8005106	1825.52	0.0231721	886.131	0.00699409	0.485413
285613	RELL2	8108822	979.026	0.047221	475.55	0.0241691	0.485738
51271	UBAP1	8154872	464.827	0.0129259	226.014	0.000343407	0.486232
644975	FLJ30064	8134460	809.182	0.0172052	393.456	0.000140791	0.486239
154807	VKORC1L1	8133119	1236.43	0.0342941	602.256	0.000247894	0.487092
55663	ZNF446	8031962	940.013	0.019874	457.977	0.00362879	0.487203
63035	BCORL1	8169882	444.189	0.00195956	216.465	0.00129943	0.487327
2187	FANCB	8171381	1010.83	0.0479587	492.655	0.00288859	0.487379
2150	F2RL1	8106403	480.781	0.00888242	234.357	0.000301293	0.487452
11045	UPK1A	8027938	1809.12	0.0330573	882.006	0.00329737	0.487533
85376	RIMBP3	8071532	1401.86	0.00698453	684.026	0.00273773	0.48794
9344	TAOK2	7994692	454.832	0.00999604	222.076	0.000839059	0.488258
2775	GNAO1	7995739	1454.52	0.0274211	710.306	0.0304138	0.488343
100130924	LOC100130924	8077877	1207.5	0.0169686	589.799	0.000360455	0.488446
144132	DNHD1	7938139	1233.68	0.00497565	602.737	0.00443158	0.48857
7726	TRIM26	8124726	591.862	0.0124342	289.168	0.000553468	0.488574
53336	CPXCR1	8168638	2634.62	0.0182253	1288.47	0.00332359	0.489053
27043	PELP1	8011692	493.098	0.00652429	241.321	0.0165639	0.489398
26015	RPAP1	7987675	897.258	0.0392496	439.495	0.0371095	0.48982
55722	CEP72	8104220	967.87	0.0133623	474.124	0.00263828	0.489864
2534	FYN	8128956	529.486	0.0264857	259.468	0.000137098	0.490038
170959	ZNF431	8027292	623.471	0.000347151	305.686	0.000209284	0.490297
4857	NOVA1	7978391	2600.36	0.0166708	1275.25	0.0251818	0.490412
84971	ATG4D	8025659	611.964	0.00367458	300.352	0.00331846	0.4908
9997	SCO2	8077099	769.244	0.00289952	377.602	0.000870772	0.490874
8312	AXIN1	7998211	610.811	0.00172611	299.9	0.000422666	0.490986
730051	ZNF814	8039692	720.891	0.0163773	354.368	0.0122463	0.491569
3798	KIF5A	7956522	808.311	0.00598852	397.402	0.00056981	0.491645
124930	ANKRD13B	8006063	898.601	0.0393546	442.265	0.0407623	0.49217
641451	SNORA19	7936637	750.428	0.000398451	369.365	2.59622e-05	0.492206
3037	HAS2	8152617	563.434	0.00200256	277.36	0.00380135	0.492267
90381	C15orf42	7985873	311.896	3.00077e-05	153.543	3.45592e-05	0.49229
3833	KIFC1	8118669	617.902	0.0327213	304.252	4.32486e-05	0.492395
6430	SFRS5	7975368	335.587	0.00122277	165.279	2.05979e-06	0.492508
89874	SLC25A21	7978692	967.318	0.00382312	476.509	0.00942251	0.492609
284114	TMEM102	8004404	648.288	0.00184693	319.389	0.000748769	0.492666
23303	KIF13B	8150036	1308.78	0.0265457	644.951	0.000601418	0.492789
51152	LOC51152	8071051	438.85	0.000842585	216.286	0.000525699	0.492848
55654	TMEM127	8053901	542.56	0.0249012	267.612	0.00294325	0.49324
90060	CCDC120	8167430	621.522	0.000755144	306.747	0.00279462	0.493541
22983	MAST1	8026063	1287.45	0.0047998	635.54	0.0109819	0.493643
7916	BAT2	8178011	536.468	0.0265723	264.848	0.0268756	0.493689
65986	ZBTB10	8147040	730.519	0.00503074	360.684	0.000502877	0.493737
340591	CA5BP	8166179	554.903	0.0193206	274.085	0.0144003	0.493934
257218	SHPRH	8130038	1357.1	0.0308208	670.649	0.0228379	0.494178
113622	ADPRHL1	7972902	1075.93	0.00672457	531.719	0.00909042	0.494192
54676	GTPBP2	8126629	458.48	0.00176764	226.693	0.000695212	0.494445
100130428	LOC100130428	7952451	478.115	0.000505789	236.419	0.000195691	0.494482
6790	AURKA	8067167	601.108	0.0358702	297.866	0.0076124	0.495528
23138	N4BP3	8110430	980.52	0.0396114	485.891	0.00540133	0.495544
9710	KIAA0355	8027604	561.91	0.00362233	278.625	0.00100635	0.495854
9700	ESPL1	7955736	598.708	0.00172484	297.291	0.00262131	0.496553
182	JAG1	8064978	617.045	0.0025558	306.612	0.0001858	0.496904
55582	KIF27	8162019	891.608	0.000653839	443.297	0.000247769	0.497188
6299	SALL1	8001387	243.331	0.0010567	121.142	0.000597723	0.497851
79137	FAM134A	8048468	691.38	0.0291241	344.47	0.00899426	0.498235
2297	FOXD1	8112592	317.112	0.00613951	158.331	0.00296161	0.499289
55349	CHDH	8088142	720.775	0.0262589	360.154	0.0235245	0.499677
383	ARG1	8122058	2471.55	0.02808	1234.98	0.000311621	0.499679
26040	SETBP1	8021047	713.585	0.0051507	356.723	0.000397312	0.499902
3202	HOXA5	8138735	451.867	8.1104e-05	226.075	0.000178588	0.500314
10313	RTN3	7940781	542.846	0.00798963	271.942	0.00105656	0.500957
81796	SLCO5A1	8151223	1133.8	0.00408127	568.079	0.0100629	0.501042
5727	PTCH1	8162533	505.352	0.00312078	253.412	0.00237416	0.501456
51807	TUBA8	8071147	810.012	0.0220247	407.161	0.00305934	0.50266
63943	FKBPL	8125316	732.464	0.000218665	368.379	0.000134514	0.502931
63943	FKBPL	8178749	732.464	0.000218665	368.379	0.000134514	0.502931
23228	PLCL2	8078187	595.685	0.000129657	299.606	1.80117e-05	0.50296
389523	GATSL1	8133540	407.391	0.0236871	205.308	0.00861801	0.503959
389523	GATSL1	8140249	407.391	0.0236871	205.308	0.00861801	0.503959
23181	DIP2A	8069399	775.984	0.0171009	391.293	0.00176331	0.504254
4693	NDP	8172220	2526.96	0.0210874	1278.7	0.000712545	0.506024
79937	CNTNAP3	8155460	2398.79	0.0363525	1214.26	0.00663732	0.506198
8744	TNFSF9	8025053	549.926	0.00928342	278.708	8.86984e-05	0.50681
441273	SPDYE2	8135204	746.655	0.0209985	378.43	0.00188881	0.506834
252983	STXBP4	8008566	879.916	0.0495855	446.055	0.00487177	0.50693
8899	PRPF4B	8116664	825.747	0.034039	419.119	0.0101203	0.507564
283970	PDXDC2	8002322	512.625	0.0196972	260.276	5.97857e-05	0.507731
54429	TAS2R5	8136654	1119.01	0.0156097	568.845	0.0021256	0.508345
79447	C16orf53	7994655	459.268	0.0140008	233.611	0.00100741	0.508659
27037	TRMT2A	8074541	643.17	0.00361951	327.245	0.00244046	0.5088
55544	RBM38	8063583	1360.97	0.0437654	692.558	0.0434592	0.508871
23254	KAZ	7898084	1256.38	0.0103947	639.423	0.00166674	0.50894
11216	AKAP10	8013431	543.99	0.00383501	277.188	0.000157927	0.509546
54510	PCDH18	8102792	397.125	0.00112182	202.375	5.8683e-06	0.5096
144132	DNHD1	7938118	957.185	0.00908389	487.955	0.000279345	0.509781
1407	CRY1	7966052	987.278	0.0407991	503.323	0.00698538	0.509808
219844	HYLS1	7945040	724.854	0.000470967	369.69	0.0014092	0.51002
3198	HOXA1	8138708	1821.09	0.0330215	928.888	0.0283516	0.510072
79034	C7orf26	8131427	521.84	0.00824332	266.236	0.00128126	0.510188
8379	MAD1L1	8137805	949.39	0.0473073	484.384	0.00135097	0.510206
80144	FRAS1	8095907	1163.98	0.0430674	594.375	0.0064749	0.510641
84144	SYDE2	7917322	758.836	0.0197602	387.571	0.00971726	0.510744
84447	SYVN1	7949383	445.026	0.0205401	227.42	0.00285441	0.511027
283111	OR51V1	7946031	2165.33	0.0341913	1107.4	0.00293825	0.511421
54812	AFTPH	8042291	503.761	0.0021122	257.685	8.30146e-05	0.511523
10625	IVNS1ABP	7922889	776.626	0.0400378	397.284	0.00664353	0.511551
4094	MAF	8002969	1269.03	0.0316723	649.502	0.0125573	0.511811
1945	EFNA4	7905909	435.523	0.000255769	223.062	3.12905e-05	0.51217
2186	BPTF	8009382	569.23	0.0407167	291.841	0.00377621	0.512695
55693	KDM4D	7943282	719.094	0.00114646	368.895	7.63048e-05	0.513
283970	PDXDC2	8000501	371.993	0.00107008	190.879	0.000261955	0.513126
406955	MIR181B1	7923173	2005.47	0.0436292	1029.43	0.000139476	0.513309
93432	LOC93432	8136709	1945.34	0.00930288	999.197	0.00715781	0.513636
4281	MID1	8171297	855.863	0.0295357	439.607	0.00139892	0.513642
8045	RASSF7	7937407	596.761	0.00420369	306.55	0.000729354	0.513691
11154	AP4S1	7973813	940.951	0.0161252	483.395	0.00168752	0.51373
607	BCL9	7904907	646.022	0.0263832	331.996	0.00346573	0.513909
10743	RAI1	8005267	396.975	0.00321574	204.068	0.000820286	0.514058
57690	TNRC6C	8010188	502.376	0.010439	258.455	0.0011669	0.514464
23248	RPRD2	7905185	392.061	0.00540643	201.71	0.000356239	0.514485
58526	MID1IP1	8166797	363.581	8.7628e-05	187.175	0.000361786	0.514808
80307	FER1L4	8065948	731.419	0.018033	376.648	0.000682784	0.514955
162417	NAGS	8007550	788.544	0.00809489	406.562	0.000986094	0.515586
151009	LOC151009	8054517	388.341	0.000796482	200.253	0.00543294	0.515663
170394	PWWP2B	7931469	949.533	0.0158888	489.646	0.000355629	0.51567
4172	MCM3	8127031	691.79	0.0247503	356.923	0.00906927	0.515941
114899	C1QTNF3	8111443	1027.67	0.000269298	530.396	5.31604e-05	0.516113
93594	WDR67	8148158	885.586	0.0200005	457.583	0.0182125	0.516701
7222	TRPC3	8102678	1152.52	0.00993871	595.938	0.00227738	0.517075
22893	BAHD1	7982738	633.634	0.00636704	327.757	0.00877303	0.517266
57186	RALGAPA2	8065280	1185.78	0.0392883	613.86	0.00165298	0.517684
127602	DNAH14	7910047	588.269	0.00203087	304.566	3.57133e-05	0.517732
7057	THBS1	7982597	866.818	0.00983802	448.871	0.000384798	0.517837
5800	PTPRO	7954143	2385.32	0.0380906	1236.61	0.00674123	0.518426
339883	C3orf35	8078605	996.053	0.000580753	516.705	0.000225851	0.518752
9278	ZBTB22	8178988	504.581	0.000147027	261.775	0.000298758	0.518797
100128364	LOC100128364	8139458	1352.9	0.0266453	702.873	0.00774272	0.519533
148252	DIRAS1	8032518	823.189	0.0275735	427.954	0.00204157	0.519873
284058	KIAA1267	8016266	317.519	0.000137563	165.27	0.000140692	0.520504
9883	POM121	8133331	284.991	0.0125128	148.548	0.00602811	0.521235
3833	KIFC1	8179564	602.335	0.018517	314.798	2.36695e-05	0.522629
201232	SLC16A13	8004266	739.451	0.00778889	386.533	0.0258343	0.52273
5544	PRB3	7961300	782.988	0.0240009	409.561	0.00167441	0.523074
63935	PCIF1	8063097	817.135	0.0229125	427.438	0.0159882	0.523093
5030	P2RY4	8173366	1356.16	0.0333982	709.446	0.0207082	0.52313
9298	SNORD31	7948898	285.943	1.7536e-05	149.607	7.97215e-05	0.523205
5564	PRKAB1	7959123	573.586	0.024531	300.127	0.000922124	0.523246
85451	UNK	8009995	359.47	0.000394042	188.183	0.000582239	0.523502
55885	LMO3	7961580	1462.83	0.00426286	765.817	0.00422254	0.523518
57455	REXO1	8032347	539.253	0.00729127	282.398	0.00832702	0.523684
140687	GCNT7	8067178	1447.46	0.0151231	758.12	0.00264429	0.523759
26812	SNORD37	8032749	1153.24	0.00699471	604.654	0.00350068	0.524308
4609	MYC	8148317	111.389	3.02255e-07	58.4123	0.000660303	0.524399
79720	VPS37B	7967331	303.078	0.0048015	158.962	0.000540418	0.524491
55135	WRAP53	8004556	881.775	0.0490858	462.517	0.0251822	0.52453
83590	TMUB1	8143879	469.83	0.0151679	246.545	0.00259775	0.524753
23369	PUM2	8050565	642.481	0.010619	337.322	0.00156912	0.52503
112399	EGLN3	7978544	658.747	0.00365407	346.579	3.58529e-05	0.526118
8556	CDC14A	7903334	687.642	0.00339514	361.943	0.00205389	0.526355
4097	MAFG	8019308	578.034	0.00434956	304.282	0.000308093	0.526409
100131534	BPA-1	7902072	1597.48	0.0163429	841.079	6.49695e-05	0.526505
153443	SRFBP1	8107578	850.346	0.0499964	447.907	0.0451542	0.526735
26052	DNM3	7907370	1664.74	0.00217212	876.898	0.00130776	0.526749
146059	CDAN1	7987928	959.82	0.0285304	505.835	0.00353496	0.527011
10464	PIBF1	7969390	769.814	0.0239051	406.099	0.0116767	0.527529
492303	GEMIN8P4	7917593	1253.75	0.0311436	661.692	0.00473129	0.527772
9047	SH2D2A	7921144	837.756	0.0147969	442.568	0.0018649	0.528278
9368	SLC9A3R1	8009685	525.628	0.0124291	277.8	0.0160849	0.528511
81553	FAM49A	8050427	2360.18	0.0267152	1247.5	0.00681193	0.528562
10612	TRIM3	7946180	964.451	0.0252659	509.885	0.00106219	0.528679
8648	NCOA1	8040552	721.69	0.0430773	381.763	0.0030692	0.528985
55068	ENOX1	7971311	1208.02	0.0421992	639.068	0.0134447	0.52902
51735	RAPGEF6	8113881	640.22	0.00914697	339.222	0.000846764	0.529852
267020	ATP5L2	8076493	1639.96	0.0309809	869.233	0.000521444	0.530033
84366	PRAC	8016484	1625.15	0.0489974	861.456	0.0126116	0.530078
596	BCL2	8023646	1284.04	0.0440937	681.297	0.0115933	0.530588
257068	PLCXD2	8081582	1552.37	0.00686525	824.575	0.00519375	0.531171
7918	BAT4	8124998	759.009	0.002021	403.223	0.000935271	0.53125
729096	BMS1P4	7927550	800.85	0.00027053	425.693	2.28094e-05	0.531552
29994	BAZ2B	8056060	730.067	0.0204784	388.302	0.000775123	0.531872
94162	SNORD38A	7901050	623.371	0.00131639	331.729	0.00416292	0.532154
8499	PPFIA2	7965166	1928.47	0.0275783	1027.58	0.005173	0.532848
2826	CCR10	8015681	849.964	0.0438291	453.221	0.000390293	0.533224
9569	GTF2IRD1	8133477	421.608	0.000940265	224.967	0.000485908	0.533593
2130	EWSR1	8072206	757.05	0.0380137	404.08	0.000555799	0.533756
1453	CSNK1D	8019463	546.636	0.0233329	291.994	0.00122932	0.534165
29959	NRBP1	8040927	525.267	0.0238025	280.754	0.000405233	0.534498
9464	HAND2	8103745	936.244	0.0157191	500.582	0.000830328	0.534671
79791	FBXO31	8003249	749.197	0.0219105	400.843	0.000142527	0.535031
55345	C4orf21	8102371	951.929	0.00523654	509.538	0.0139629	0.535269
84134	TOMM40L	7906728	906.82	0.0224326	485.447	0.00700403	0.53533
4640	MYO1A	7964316	1234.48	0.0220534	661.87	0.00131789	0.536153
23179	RGL1	7908125	534.829	0.0106829	286.873	8.65175e-06	0.536382
140701	C20orf135	8064203	1083.12	0.0333329	581.14	0.000418477	0.536543
51003	MED31	8011968	338.534	0.00486863	181.947	1.83508e-05	0.537457
283970	PDXDC2	8000537	371.993	0.00107008	200.056	0.000327737	0.537796
677849	SNORD1B	8010080	1177.01	0.000134613	633.007	5.41048e-06	0.537812
30836	DNTTIP2	7917771	837.997	0.0440056	450.854	0.0280401	0.538014
56172	ANKH	8111101	664.851	0.0413832	358.065	0.00954531	0.538565
23049	SMG1	8002333	612.806	0.00942343	330.045	0.00196929	0.538579
51175	TUBE1	8128977	1158.8	0.041307	624.252	0.0389214	0.538706
10019	SH2B3	7958749	608.004	0.040119	327.861	0.00271454	0.539241
5580	PRKCD	8080487	632.607	0.0258191	341.148	0.00900486	0.539272
23049	SMG1	8000217	640.685	0.0312244	345.514	0.00721024	0.539288
9667	SAFB2	8032974	594.712	0.00892952	320.891	0.00249021	0.539574
353322	ANKRD37	8098604	700.762	0.0137238	378.373	0.000289873	0.539946
402483	FLJ45340	8135931	444.055	0.00020619	239.897	8.32177e-05	0.540241
85415	RHPN2	8035980	590.249	0.0079968	318.927	0.00290011	0.540326
57396	CLK4	8116227	530.828	0.00220947	286.879	0.000243798	0.540437
112869	CCDC101	7994362	417.14	0.00456035	225.585	7.51844e-06	0.540791
23387	SIK3	7951873	347.033	0.000704377	187.729	0.00049654	0.540954
26772	SNORD4B	8005957	560.276	0.00747154	303.302	0.0210435	0.541344
64410	KLHL25	7991173	883.724	0.00393128	478.978	0.000397839	0.542
55182	RNF220	7900979	508.611	0.0222184	275.772	0.000208722	0.542206
5732	PTGER2	7974366	916.063	0.000975659	496.717	0.000413883	0.54223
26959	HBP1	8135392	465.146	0.00736423	252.318	9.92918e-06	0.54245
83903	GSG2	8003844	451.231	0.000143279	244.778	0.00051496	0.542467
5917	RARS	8109802	650.581	0.0310302	352.958	0.0255934	0.542527
64599	GIGYF1	8141595	735.254	0.0111429	399.188	0.00553355	0.542925
100132686	LOC100132686	7943890	1403.84	0.00649508	762.699	6.99754e-05	0.543295
8340	HIST1H2BL	8124510	921.756	0.00899511	500.928	0.0144181	0.54345
7272	TTK	8120838	543.226	0.00190689	295.286	0.00688795	0.543578
55374	TMCO6	8108579	874.186	0.00651228	475.392	0.00341315	0.543811
993	CDC25A	8086880	577.032	0.000246899	313.821	0.000274173	0.543853
100130733	LRRC70	8105579	1386.52	0.000204179	754.149	2.42518e-05	0.543916
388692	LOC388692	7905043	1130.45	0.00296392	615.5	0.000146059	0.544475
6197	RPS6KA3	8171762	723.363	0.0409558	393.885	0.0181266	0.544519
1491	CTH	7902290	888.847	0.0206979	484.223	0.01744	0.544777
29063	ZCCHC4	8094393	1044.3	0.0255676	568.944	0.0048871	0.544809
54700	RRN3	7999608	1188.71	0.0424709	647.628	0.0328673	0.544817
135112	NCOA7	8121861	938.906	0.046023	511.593	0.000218935	0.544882
619571	SNORD96A	8116530	342.221	0.000145207	186.498	4.81389e-05	0.544963
10804	GJB6	7970448	1169.97	0.0129201	637.756	1.66373e-05	0.545106
81558	FAM117A	8016590	656.706	0.00393583	358.069	0.00739816	0.545251
5989	RFX1	8034722	521.538	0.00196301	284.399	8.05881e-05	0.545308
6660	SOX5	7961798	1206.45	0.0277769	659.144	0.000943732	0.546349
3551	IKBKB	8146171	723.143	0.0270191	395.138	0.00150911	0.546418
55561	CDC42BPG	7949227	951.947	0.0191826	520.319	0.00280956	0.546584
50487	PLA2G3	8075468	1160.29	0.0344528	634.228	0.00185358	0.54661
23613	ZMYND8	8066786	458.411	0.00801839	250.901	5.75546e-05	0.547327
201163	FLCN	8013071	578.259	0.00772933	316.621	0.000344271	0.547542
157247	MGC27345	8142770	742.107	0.0133716	406.344	0.010814	0.547554
51320	MEX3C	8023377	535.299	0.038168	293.219	0.00342625	0.547766
9776	KIAA0652	7939676	668.257	0.0396659	366.128	0.00889857	0.547886
80728	ARHGAP39	8153876	711.872	0.00901406	390.489	0.00371742	0.548538
9293	GPR52	7907531	839.153	0.000612921	460.404	7.48367e-06	0.548653
9640	ZNF592	7985605	289.682	0.000205988	158.945	0.00117822	0.548687
80209	C13orf23	7971134	545.948	0.0182058	299.624	0.00594423	0.548813
6934	TCF7L2	7930537	438.484	0.0131457	240.751	0.00113291	0.549054
283970	PDXDC2	7994559	359.037	0.00079756	197.142	0.000194743	0.549086
114799	ESCO1	8022473	773.496	0.002182	424.788	0.0259811	0.54918
22877	MLXIP	7959361	323.2	0.00766159	177.596	0.0101264	0.549491
104	ADARB1	8069178	1270.24	0.0476988	698.161	0.0147246	0.549627
84975	MFSD5	7955729	407.336	0.00162566	224.016	1.74256e-05	0.549953
54413	NLGN3	8168264	1358.39	0.045579	747.139	0.0207174	0.550019
5937	RBMS1	8056206	719.721	0.0487645	395.936	0.0128309	0.550124
9541	CIR1	8056829	854.931	0.0338905	470.594	0.00153956	0.550446
223082	ZNRF2	8132062	553.099	0.0185248	305.134	0.000691092	0.55168
90525	SHF	7988400	1284.17	0.0399351	708.506	0.00297759	0.551722
55614	KIF16B	8065089	749.4	0.00885314	413.543	0.00243153	0.551833
6483	ST3GAL2	8002370	617.232	0.039627	341.036	0.0036195	0.552526
55727	BTBD7	7980998	527.48	0.0120716	291.751	3.89837e-05	0.553103
8313	AXIN2	8017718	622.271	0.00014075	344.211	3.26225e-05	0.553153
6548	SLC9A1	7914021	465.313	0.0299718	257.396	0.00573768	0.553167
9739	SETD1A	7994985	350.405	0.00094468	193.942	0.00147179	0.553478
79598	CEP97	8081362	646.851	0.0217577	358.041	0.00572237	0.553514
84814	PPAPDC3	8158825	808.206	0.0192258	447.433	0.00329833	0.553613
25841	ABTB2	7947462	465.242	7.53371e-05	257.641	6.81613e-05	0.553778
692233	SNORD117	8124940	636.69	0.00108085	352.721	4.38352e-05	0.553991
337876	CHSY3	8107850	1034.49	0.0416192	573.119	0.0119906	0.554013
131405	TRIM71	8078435	841.03	0.00174469	466.379	0.00494141	0.554533
57513	CASKIN2	8018379	511.067	0.00749809	283.411	0.00192534	0.554548
25925	ZNF521	8022612	551.999	0.00495397	306.12	3.12195e-05	0.554566
2909	GRLF1	8029856	369.066	0.000997017	204.81	5.98417e-05	0.55494
55175	KLHL11	8015456	633.16	0.0270275	351.37	0.00750924	0.554946
23139	MAST2	7901140	586.206	0.0213866	325.381	0.00266605	0.555062
653635	WASH7P	7911309	463.56	0.000970738	257.38	0.000408579	0.555225
389517	SPDYE8P	8133571	820.739	0.0302644	456.263	0.0049849	0.555917
442186	OR2J3	8179003	1229.01	0.0179743	683.315	2.4092e-05	0.555989
442186	OR2J3	8177694	1229.01	0.0179743	683.315	2.4092e-05	0.555989
220992	ZNF485	7927173	794.231	0.00399157	441.914	0.00486657	0.556405
26814	SNORD36B	8159006	341.676	9.15269e-05	190.161	4.3834e-06	0.556554
6314	ATXN7	8080878	321.035	0.000472199	178.69	0.00115022	0.556607
2869	GRK5	7930894	598.733	0.0193897	333.319	0.00063763	0.556707
50515	CHST11	7958202	902.388	0.00196222	502.869	0.00149955	0.557265
9730	VPRBP	8087748	837.593	0.0438115	466.807	0.00206965	0.55732
7003	TEAD1	7938544	647.842	0.0161038	361.195	0.00126176	0.557536
78995	C17orf53	8007569	601.03	0.00306287	335.112	0.00243679	0.557564
51043	ZBTB7B	7905854	478.756	0.00825646	266.94	0.00202966	0.55757
57096	RPGRIP1	7973185	1850.22	0.00747594	1031.9	0.00219476	0.557716
81543	LRRC3	8069122	1058.57	0.0458095	590.457	0.00505346	0.55779
7625	ZNF74	8071382	763.645	0.00845504	426.281	0.00139059	0.558219
3764	KCNJ8	7961702	554.946	0.0204006	309.827	3.20775e-06	0.5583
9870	KIAA0317	7980189	553.623	0.0198507	309.096	0.00418378	0.558316
90416	C15orf57	7987526	955.966	0.0335367	534.184	0.0208269	0.55879
54788	DNAJB12	7934244	710.811	0.0344455	397.261	0.00266965	0.558884
57697	FANCM	7974166	710.888	0.000187832	397.763	0.000453796	0.559529
55340	GIMAP5	8137257	1755.68	0.0352173	982.524	0.0227826	0.559627
1385	CREB1	8047839	746.295	0.0491728	417.671	0.00630571	0.55966
55262	C7orf43	8141445	577.885	0.0125162	324.152	0.00808155	0.560928
57154	SMURF1	8141241	467.456	0.00273313	262.318	0.000207048	0.561161
442582	STAG3L2	8140196	410.37	0.00577876	230.294	0.000628084	0.561187
23476	BRD4	8034983	569.523	0.0122967	319.712	0.0144786	0.561368
100124537	SNORA70B	8052524	739.31	9.81839e-05	415.254	2.12436e-05	0.561678
23005	MAPKBP1	7982985	619.329	0.0471426	348.081	0.000471829	0.562029
54487	DGCR8	8071314	409.976	0.0015339	230.539	2.68497e-05	0.562323
30850	CDR2L	8009721	750.422	0.0237348	422.332	0.00289309	0.562793
80346	REEP4	8149673	844.461	0.049054	475.284	0.0132796	0.562826
10668	CGRRF1	7974418	1070.57	0.0394676	602.701	0.00265149	0.562974
5598	MAPK7	8005576	389.343	0.00272903	219.346	0.000935473	0.563374
9334	B4GALT5	8066939	496.6	0.0149294	279.786	0.00484589	0.563403
3664	IRF6	7924058	1658.8	0.0481869	935.256	0.00477073	0.563815
286262	TPRN	8165478	731.508	0.00270217	412.563	0.00245639	0.56399
221002	RASGEF1A	7933149	1015.27	0.0130152	572.88	0.0132924	0.564264
80742	PRR3	8117922	982.566	0.0289075	554.52	0.0380611	0.56436
50832	TAS2R4	8136645	961.715	0.00216878	542.822	0.000741828	0.564431
85391	SNORD14E	7952335	525.018	2.13362e-06	296.351	5.70789e-05	0.56446
27328	PCDH11X	8168657	3742.2	0.0333192	2113.96	0.0239941	0.564898
55565	ZNF821	8002618	891.33	0.00153778	503.669	0.00136508	0.565075
55319	C4orf43	8098150	629.897	0.0130699	356.118	0.02501	0.565359
10523	CHERP	8035156	431.955	0.00763554	244.504	0.0149518	0.566041
9098	USP6	8004086	2407.99	0.0144146	1363.1	0.0331774	0.566072
4943	TBC1D25	8167314	519.068	0.0140347	293.848	0.000426143	0.566107
85446	ZFHX2	7978056	1332.37	0.03538	754.374	0.00530386	0.566189
9025	RNF8	8119184	885.16	0.0454405	501.897	0.021826	0.567013
342615	SLFN12L	8014257	620.773	0.0177391	352.011	0.00641446	0.567054
8165	AKAP1	8008664	675.988	0.00256365	383.385	0.00168749	0.567147
100289528	LOC100289528	8161554	571.424	0.0482908	324.134	0.00109514	0.567239
100289528	LOC100289528	8161373	571.424	0.0482908	324.134	0.00109514	0.567239
652	BMP4	7979241	649.8	0.00243001	368.867	0.000433245	0.567663
128153	SPATA17	7909768	1651.92	0.0235516	937.907	0.0347786	0.567769
8543	LMO4	7902810	416.242	0.0106379	236.432	0.000306013	0.568017
85450	ITPRIP	7936242	361.364	0.00282298	205.307	0.000334174	0.568145
9284	NPIP	7993580	338.826	0.00260553	192.589	0.00180053	0.568401
113691	MGC16703	8074695	1211.69	0.0354158	688.924	0.000359407	0.568563
146909	KIF18B	8016147	788.847	0.00251474	448.549	0.0135641	0.568613
1268	CNR1	8128043	2391.06	0.0478015	1359.9	0.00185159	0.568745
27000	DNAJC2	8141898	675.435	0.0416361	384.355	0.0291987	0.569048
8660	IRS2	7972745	588.01	0.00377661	334.699	0.0032782	0.569205
64207	C14orf4	7980338	342.642	0.0108577	195.042	0.00285642	0.56923
115123	2011-03-03	8113790	932.687	0.0253155	531.16	0.00673821	0.569495
149041	RC3H1	7922432	726.556	0.0234853	413.849	0.00106757	0.569603
100101267	POM121C	8140297	302.233	0.00490106	172.164	0.0106582	0.56964
64843	ISL2	7985080	829.595	0.0101248	472.893	0.00338206	0.570028
131096	KCNH8	8078196	2925.3	0.0121474	1668.06	0.000543621	0.570218
23049	SMG1	8000834	448.092	0.00166899	255.686	0.000280803	0.570612
23117	NPIPL3	8000636	424.279	0.01224	242.127	0.00355358	0.570679
254170	FBXO33	7978748	512.167	0.00724901	292.459	8.84948e-05	0.571023
84083	ZRANB3	8055377	1366.97	0.0347777	780.975	0.023304	0.571317
677803	SNORA15	8133072	888.952	3.11039e-06	508.045	0.000756321	0.57151
677803	SNORA15	8133108	888.952	3.11039e-06	508.045	0.000756321	0.57151
8874	ARHGEF7	7970111	618.513	0.0412028	353.552	0.000460725	0.571617
23133	PHF8	8173009	859.021	0.0337579	491.252	0.010842	0.571874
9754	STARD8	8168028	645.738	0.00191703	369.54	0.000141518	0.572275
283219	KCTD21	7942796	1452.86	0.0204266	831.49	0.00147871	0.572314
22887	FOXJ3	7915408	370.749	0.013864	212.2	0.00325206	0.572356
570	BAAT	8162870	2980.22	0.0453229	1706.43	0.0448459	0.572583
7776	ZNF236	8021783	727.582	0.0159355	416.639	0.00285788	0.572635
22992	KDM2A	7941769	432.821	0.00180267	247.904	0.000369649	0.572764
3746	KCNC1	7938738	973.449	0.0428594	557.868	0.00175438	0.573084
151987	PPP4R2	8080973	820.23	0.0107562	470.113	0.00500657	0.573148
729092	AGAP5	7933427	800.541	0.0195711	458.966	0.00260488	0.57332
100132288	LOC100132288	8177120	600.921	0.00133776	344.562	0.00571107	0.57339
5292	PIM1	8119161	501.185	0.00134084	287.541	0.000328323	0.573723
23352	UBR4	7913001	448.145	0.00564243	257.35	0.000443573	0.574257
386724	AMIGO3	8087453	716.203	0.0116966	411.303	0.0129839	0.574283
387535	HCRP1	8119525	1593.93	0.0134747	915.549	0.00572631	0.574396
9519	TBPL1	8122182	561.1	0.016339	322.381	0.00252451	0.574551
23049	SMG1	8000156	568.844	0.0116849	326.839	0.00387238	0.574568
57732	ZFYVE28	8099008	1039.7	0.0105805	597.508	0.00220488	0.574693
57693	ZNF317	8025458	340.644	3.36706e-05	195.834	6.94683e-05	0.574895
29775	CARD10	8075934	1058.93	0.0409239	609.196	0.00968569	0.575294
64582	GPR135	7979426	658.463	0.00177606	378.945	0.000285773	0.575499
26797	SNORD52	8118322	222.962	2.69235e-05	128.339	7.53349e-06	0.575611
8886	DDX18	8044745	746.91	0.0372385	429.964	0.0176219	0.575657
100033422	SNORD116-10	7981968	3022.02	0.0284204	1741.66	0.000331734	0.576322
84657	C3orf42	8077815	626.907	0.00100224	361.311	0.000808627	0.576339
388428	LOC388428	8010583	1511.43	0.0301023	871.33	0.0265993	0.576493
54790	TET2	8096675	361.057	0.000539699	208.201	0.00027206	0.576644
440456	PLEKHM1P	8017675	399.199	0.00591489	230.262	0.00149896	0.576809
63916	ELMO2	8066716	484.487	0.00631671	279.776	0.000977764	0.57747
9988	DMTF1	8133914	788.18	0.0294658	455.183	0.00719576	0.577511
10509	SEMA4B	7985934	660.135	0.00221262	381.256	0.000227916	0.577542
2099	ESR1	8122840	2021.05	0.0420604	1167.42	0.000740741	0.577631
23322	RPGRIP1L	8001423	1134.13	0.0198327	655.425	0.0210026	0.577908
10813	UTP14A	8169868	749.136	0.0300617	433.142	0.0147782	0.578189
26770	SNORD79	7922406	360.752	0.000337499	208.61	0.0013187	0.578265
84167	C19orf44	8026568	879.862	0.0134259	508.953	0.00306918	0.578447
6667	SP1	7955787	560.02	0.015021	324.022	0.00178888	0.57859
55870	ASH1L	7920766	453.724	0.00612744	262.622	0.000660594	0.578814
8341	HIST1H2BN	8117600	909.408	0.0275459	526.861	0.00368867	0.579345
5101	PCDH9	7971922	2155.5	0.0288509	1248.83	0.0358079	0.579366
23049	SMG1	8000823	583.978	0.00650274	338.365	0.00348594	0.579414
344387	CDKL4	8051696	2378.5	0.0446527	1378.46	0.000123361	0.57955
23250	ATP11A	7970162	944.209	0.0365426	547.244	0.00159969	0.57958
64895	PAPOLG	8042119	419.211	0.000451914	243.115	0.000412763	0.579934
54890	ALKBH5	8005399	531.394	0.010136	308.212	0.0049856	0.580007
9807	IP6K1	8087473	368.698	0.000352726	213.85	1.18373e-05	0.580014
10896	OCLM	7908347	778.67	0.010595	451.672	0.00344539	0.580055
7798	LUZP1	7913558	356.463	0.00125417	206.888	0.000102248	0.580393
642477	FLJ39632	8074168	721.453	0.0141514	418.762	0.000837442	0.580443
79669	C3orf52	8081645	633.766	0.000423703	367.96	0.00183176	0.580594
56895	AGPAT4	8130628	1153.32	0.0317975	669.856	0.0297299	0.580808
84101	USP44	7965565	1009	0.00250629	586.211	0.00313998	0.580984
23221	RHOBTB2	8145227	907.017	0.0213741	527.235	0.00380755	0.581284
2335	FN1	8058765	1003.44	0.0418778	583.547	0.041061	0.581547
728833	FAM72D	7909146	825.267	0.0357194	479.979	0.0451183	0.581604
55254	TMEM39A	8089759	425.621	0.00952821	247.637	0.000233857	0.581825
613210	DEFB136	8149347	1639.52	0.000915431	954.455	0.00143889	0.582155
85463	ZC3H12C	7943715	622.477	0.00179548	362.394	0.00043059	0.58218
54537	FAM35A	7928909	732.864	0.0389568	427.051	0.041142	0.582715
54855	FAM46C	7904361	718.36	0.0489227	418.99	0.00527825	0.58326
55824	PAG1	8151512	890.852	0.0229291	519.851	0.00356003	0.583544
79659	DYNC2H1	7943498	903.105	0.00574667	527.134	0.0295165	0.58369
1594	CYP27B1	7964535	1385.41	0.0381644	808.769	0.0276868	0.583777
402483	FLJ45340	8031992	357.019	0.0189706	208.718	0.00359822	0.584611
55018	C17orf73	8016735	1533.12	0.0488762	897.181	0.000494502	0.5852
7289	TULP3	7953135	551.097	0.027246	322.651	0.000858118	0.58547
10224	ZNF443	8034393	792.963	0.00231193	464.265	0.0138314	0.585481
1839	HBEGF	8114572	798.038	0.0220799	467.393	0.0140645	0.585678
10891	PPARGC1A	8099633	817.967	0.00185986	479.369	0.000174126	0.58605
10942	PRSS21	7992722	1245.78	0.0188107	730.106	0.0257688	0.586064
80319	CXXC4	8102135	1411.24	0.00733308	827.12	0.0275758	0.586093
126526	C19orf47	8036867	914.792	0.0272785	536.187	0.00912748	0.58613
84133	ZNRF3	8072160	476.76	0.00105909	279.47	0.000599711	0.586185
85026	C9orf37	8165630	570.338	0.00580212	334.379	0.000289588	0.586282
27106	ARRDC2	8026915	691.584	0.0155453	405.67	0.0010014	0.58658
4097	MAFG	8019796	258.728	0.000121281	151.781	6.13093e-05	0.586643
22879	MON1B	7997321	601.052	0.028359	352.715	0.00165035	0.58683
4084	MXD1	8042503	478.308	0.000903395	280.723	7.3098e-06	0.586909
4671	NAIP	8112521	1015.96	0.0393347	596.621	0.00530653	0.587247
4671	NAIP	8177527	1015.96	0.0393347	596.621	0.00530653	0.587247
144110	TMEM86A	7938812	919.288	0.00550237	540.061	2.20711e-05	0.587477
84968	PNMA6A	8175768	1130.15	0.0381401	664.226	0.00208486	0.587731
54969	C4orf27	8103684	713.568	0.021856	419.612	0.0474435	0.588047
440804	RIMBP3B	8074591	1748.67	0.0109795	1028.49	0.00221935	0.588156
79812	MMRN2	7934842	1000.47	0.0390653	588.435	0.000582387	0.588156
1969	EPHA2	7912706	341.909	0.000716614	201.131	0.00159128	0.588257
442578	STAG3L3	8133610	426.084	0.00833766	250.654	0.000453558	0.588274
80853	JHDM1D	8143341	751.579	0.00106523	442.742	0.0120399	0.589082
26579	MYEOV	7942118	1665	0.0357235	981.057	0.0377599	0.589222
23049	SMG1	8000651	581.499	0.0113407	342.651	0.00023569	0.589254
26509	MYOF	7935058	822.141	0.0344694	484.45	0.00461419	0.589255
124245	ZC3H18	7997779	456.634	0.0027268	269.2	0.00247628	0.58953
259292	TAS2R46	7961293	1235.58	0.000424359	728.95	0.00011358	0.589967
51326	ARL17A	8016285	680.725	0.0292413	401.629	0.00205127	0.590002
391257	SUMO1P1	8067121	1337.95	0.0460476	789.606	0.0036163	0.590159
26054	SENP6	8120758	568.245	0.0140092	335.386	0.0186842	0.590213
7916	BAT2	8118174	431.877	0.011442	254.915	0.0176462	0.59025
80262	C16orf70	7996403	241.897	9.15752e-05	142.832	1.94154e-05	0.590466
147339	C18orf25	8021113	543.7	0.00175189	321.151	0.0017996	0.590677
55164	SHQ1	8088830	797.829	0.0433061	471.419	0.0171299	0.590878
388567	ZNF749	8031748	598.006	1.47632e-06	353.362	0.00185641	0.5909
90634	N4BP2L1	7970892	1432.01	0.0167617	846.821	0.00115807	0.591352
5826	ABCD4	7980115	774.684	0.0295264	458.294	0.000266045	0.591589
100379141	SNORA70D	8002590	848.884	0.0150337	502.287	0.000253906	0.591702
58508	MLL3	8143988	471.458	0.0066816	279.047	0.00417385	0.59188
3373	HYAL1	8087611	877.936	0.00803875	519.844	0.00133538	0.59212
57459	GATAD2B	7920341	336.82	0.00456957	199.488	0.00927019	0.592268
7020	TFAP2A	8123864	225.765	0.000362075	133.718	0.000949526	0.59229
81565	NDEL1	8004867	435	0.00196219	257.75	0.00100951	0.592529
3104	ZBTB48	7897305	769.732	0.00217016	456.239	0.000593295	0.592724
84068	SLC10A7	8103043	706.468	0.0122559	418.974	0.00095587	0.593055
9493	KIF23	7984540	532.623	0.00812474	315.968	0.000667423	0.593231
83891	SNX25	8098581	581.108	0.00966778	344.787	0.00102646	0.593327
155435	RBM33	8137542	345.742	0.00261151	205.171	0.00607543	0.593421
79831	JMJD5	8000411	1581.84	0.0142467	938.746	0.0046719	0.593453
729603	LOC729603	8123230	501.046	2.46669e-05	297.447	0.000126473	0.593652
100128816	LOC100128816	7960362	1000.01	0.0255498	593.94	0.0238729	0.593937
8370	HIST2H4A	7919627	487.256	0.0142059	289.519	0.000993377	0.594183
8370	HIST2H4A	7905067	487.256	0.0142059	289.519	0.000993377	0.594183
5976	UPF1	8027074	566.613	0.0288905	336.723	0.00365464	0.594274
114815	SORCS1	7936249	1459.13	0.00352336	867.224	0.00315192	0.594345
3203	HOXA6	8138741	894.147	0.035816	531.482	0.00297168	0.594401
550631	CCDC157	8072316	788.861	0.00413502	469.387	0.00535242	0.595019
9969	MED13	8017312	451.155	0.00146005	268.483	3.83004e-05	0.595102
100129113	LOC100129113	8074307	883.214	0.012755	525.786	0.00147995	0.59531
7866	IFRD2	8087576	810.694	0.0435455	482.641	0.00669776	0.595343
79029	SPATA5L1	7983469	869.619	0.0174067	517.747	0.00214844	0.595373
6533	SLC6A6	8078014	715.27	0.0495174	425.875	0.00624064	0.595404
57507	ZNF608	8113761	404.991	0.000140822	241.162	5.10746e-05	0.595474
646851	LOC646851	8076113	1411.24	0.011357	840.394	0.0131547	0.595499
283970	PDXDC2	7997239	347.982	0.000623702	207.303	0.000253285	0.59573
51649	MRPS23	8016870	723.173	0.0368773	431.372	0.0427773	0.596499
26036	ZNF451	8120382	617.076	0.0391175	368.287	0.00278717	0.596827
80108	ZFP2	8110472	1228.31	0.0410602	734.043	0.00286976	0.597603
127495	LRRC39	7917996	1216.09	0.000627293	727.284	0.0056611	0.598051
4155	MBP	8023889	1408.51	0.0255853	842.568	0.0105615	0.598196
4772	NFATC1	8021866	803.897	0.0265273	480.938	0.0288239	0.598258
388403	YPEL2	8008819	688.284	0.00293584	412.023	0.0017998	0.598624
65997	RASL11B	8095043	798.745	0.00234759	478.632	0.000593487	0.599229
64375	IKZF4	7956105	923.169	0.0298425	554.597	0.000555951	0.600754
11329	STK38	8119076	1471.51	0.0144512	884.024	0.000466984	0.600758
11138	TBC1D8	8054308	563.971	0.00736817	338.857	2.11814e-05	0.600842
23207	PLEKHM2	7898227	557.429	0.0184536	334.946	0.016832	0.600876
10585	POMT1	8158866	696.256	0.0398031	418.504	0.00333128	0.601078
130540	ALS2CR12	8058203	1752.99	0.00668443	1053.89	0.0002773	0.601197
9366	RAB9BP1	8107200	3883.43	0.0378976	2336.13	0.0114493	0.601563
134860	TAAR9	8122127	2715.97	0.0421498	1633.86	0.0280022	0.601576
55119	PRPF38B	7903519	669.429	0.0309463	402.863	0.0086794	0.601801
54941	RNF125	8020806	795.622	0.000569611	478.812	0.0126327	0.601808
8481	OFD1	8166104	626.633	0.00330016	377.169	0.00306784	0.601898
29889	GNL2	7915015	642.676	0.0404693	386.848	0.0125807	0.601934
59269	HIVEP3	7915392	1407.3	0.0228581	847.486	0.000717586	0.602208
400870	FLJ41733	8068891	1353.54	0.0404754	815.13	0.00166909	0.60222
51092	SIDT2	7944049	521.777	0.0339035	314.34	0.00564112	0.602442
55714	ODZ3	8098441	962.422	0.043295	579.943	0.0254797	0.602587
353145	LCE3E	7920182	698.224	0.0404285	420.965	0.00241675	0.602908
200424	TET3	8042811	545.898	0.00063758	329.159	0.00609371	0.602968
1195	CLK1	8058127	296.111	0.000104044	178.623	1.12495e-05	0.603229
10912	GADD45G	8156309	1316.42	0.0237937	794.306	0.00424443	0.603385
23314	SATB2	8058091	485.034	0.0218968	292.767	0.00117113	0.603601
5533	PPP3CC	8145136	454.825	0.0134066	274.622	0.00138086	0.603797
27324	TOX3	8001394	1137.91	0.0436084	687.387	0.000906856	0.604078
5387	PMS2L3	8140311	325.327	0.00198225	196.551	4.27287e-05	0.604165
50511	SYCP3	7965800	2206.68	0.00473161	1333.37	0.00478663	0.604241
2122	MECOM	8091972	759.694	0.000531988	459.107	0.000525994	0.604331
414189	AGAP6	7927552	758.485	0.0281364	458.466	0.00346309	0.604449
51341	ZBTB7A	8032755	417.888	0.00341977	252.674	0.00115743	0.604645
9684	LRRC14	8148923	417.443	0.00270064	252.475	0.00185089	0.604815
554249	LOC554249	8161353	1020.37	0.0348043	617.331	0.00335794	0.605007
375444	C5orf34	8111960	596.1	0.00116852	360.98	0.00321427	0.60557
10009	ZBTB33	8169683	613.409	0.00183788	371.523	0.00479755	0.60567
284565	NBPF15	7919351	690.155	0.0114852	418.106	0.00245199	0.605815
284565	NBPF15	7919271	690.155	0.0114852	418.106	0.00245199	0.605815
118670	FAM24A	7931155	2317.27	0.0405726	1403.91	0.0155879	0.605847
55891	LENEP	7905848	978.154	0.018167	592.854	0.0126952	0.606095
84851	TRIM52	8110666	240.951	6.90819e-06	146.076	1.84515e-06	0.606246
387849	REP15	7954589	1706.41	0.026949	1034.64	0.000352688	0.606329
253639	ZNF620	8078999	907.768	0.004756	550.937	0.00379858	0.606913
63925	ZNF335	8066641	431.168	0.00259469	261.763	0.00290307	0.607101
145748	LYSMD4	7991503	1007.4	0.00553787	611.724	0.00084683	0.607231
1859	DYRK1A	8068551	271.038	0.000199576	164.76	1.88588e-05	0.607884
2872	MKNK2	8032392	457.85	0.0123878	278.482	0.00553561	0.608239
57688	ZSWIM6	8105506	267.46	0.000202333	162.788	0.000186539	0.608645
9096	TBX18	8127932	635.173	0.0235405	386.678	0.0134909	0.608776
90780	PYGO2	7920594	315.918	1.08592e-05	192.393	0.00225806	0.608999
116211	TM4SF19	8093104	1600.12	0.0477527	974.567	0.0280384	0.609058
10880	ACTL7B	8163019	1057.58	0.013199	644.283	0.00731473	0.609207
51230	PHF20	8062213	728.025	0.044044	443.522	0.00862419	0.609212
342892	ZNF850P	8036351	506.208	1.27236e-05	308.455	0.0013447	0.609344
25957	SFRS18	8128394	630.775	0.0400108	384.378	0.00786769	0.609374
8440	NCK2	8044133	691.219	0.0481706	421.231	0.0202623	0.609403
890	CCNA2	8102643	561.941	0.015648	342.716	0.0256342	0.609879
84553	C6orf168	8128371	740.965	0.0176137	452.208	0.0023419	0.610295
221302	ZUFSP	8129108	731.675	0.00221994	446.664	0.0339745	0.610468
2063	NR2F6	8035249	583.96	0.0297694	356.964	0.00438434	0.611282
254251	LCORL	8099581	723.044	0.0181458	442.068	0.0476187	0.611399
4863	NPAT	7951497	405.66	0.00138221	248.074	0.000847419	0.611532
677817	SNORA36A	8170990	902.198	0.0074571	552.121	0.00939058	0.611973
23276	KLHL18	8079517	581.355	0.0023009	355.924	0.00203595	0.612232
5937	RBMS1	8056201	796.844	0.0281725	487.917	0.0143791	0.612311
10818	FRS2	7957043	505.789	0.0058068	310.224	8.53396e-05	0.613346
55692	LUC7L	7998174	314.42	0.000152674	192.867	5.24047e-06	0.613408
675	BRCA2	7968484	1232.4	0.0306871	756.148	0.0249987	0.61356
27154	BRPF3	8119034	598.688	0.00614941	367.392	0.00107886	0.613662
340075	ARSI	8115144	1111.67	0.0292734	682.272	0.00266764	0.613736
677778	SCARNA15	7985480	1847.28	0.0147979	1133.87	0.000742011	0.613805
23414	ZFPM2	8147837	983.823	0.0114521	603.984	0.00410582	0.613915
51493	C22orf28	8075585	712.518	0.0489081	437.474	0.0390499	0.613982
55638	SYBU	8152355	813.86	0.00966937	499.772	2.46824e-05	0.614077
9515	STXBP5L	8081959	1423.87	0.016169	874.869	0.00953431	0.614429
1974	EIF4A2	8084694	443.589	0.0218153	272.706	0.00563195	0.614772
6095	RORA	7989365	717.253	0.0060925	441.057	0.000520542	0.614926
23240	KIAA0922	8097867	368.562	1.12757e-05	226.654	0.0002705	0.61497
7841	MOGS	8053158	612.242	0.0156408	376.644	0.00291485	0.615188
57585	CRAMP1L	7992302	848.063	0.00335308	521.974	0.000459689	0.61549
22853	LMTK2	8134435	521.551	0.00290287	321.15	0.00124082	0.61576
94104	GCFC1	8070046	613.669	0.00436808	377.93	0.0130396	0.615853
9284	NPIP	7999766	269.522	0.000892804	166.028	0.000950763	0.616008
5883	RAD9A	7941865	629.617	0.00406649	387.91	0.000318844	0.616104
54936	ADPRHL2	7900087	394.442	0.000100996	243.057	8.57048e-06	0.616204
23163	GGA3	8018324	497.033	0.0011965	306.305	0.00667351	0.616267
100287934	LOC100287934	7909990	376.662	7.83136e-06	232.143	0.000100807	0.616315
9849	ZNF518A	7929562	548.856	0.000412983	338.308	0.000451058	0.616388
80094	FLJ14107	8149718	1325.86	0.0310355	817.835	7.20512e-06	0.616835
124045	C16orf55	7997976	1217.4	0.0478118	751.241	0.00336369	0.617088
1196	CLK2	7920737	584.368	0.0330983	360.662	0.000842727	0.617184
389616	OR7E125P	8144496	982.582	0.0217589	606.71	0.0017917	0.617465
4826	NNAT	8062395	1017.61	0.0278616	628.589	0.00261647	0.617713
389517	SPDYE8P	8133590	864.214	0.0334837	533.881	0.00545566	0.617765
5289	PIK3C3	8021015	613.219	0.024675	379.113	0.00222534	0.618234
51326	ARL17A	8007794	612.801	0.00740795	378.933	0.000132571	0.618362
389616	OR7E125P	8149148	881.059	0.0275018	545.106	0.00393674	0.618694
26777	SNORA71A	8066258	728.95	0.0310408	451.19	0.0435533	0.618959
80071	CCDC15	7944913	1512.47	0.00365897	936.37	0.0339336	0.619099
677826	SNORA45	7938293	351.896	1.30334e-05	218.016	0.000607777	0.619546
10207	INADL	7901804	960.201	0.0249375	595.137	0.00685123	0.619805
57531	HACE1	8128522	749.057	0.0262785	464.424	0.00460653	0.620012
54531	MIER2	8032009	437.479	0.000695154	271.402	0.00025781	0.620378
4853	NOTCH2	7919095	600.345	0.0221139	372.554	0.00203726	0.620567
5393	EXOSC9	8097128	533.047	0.0416981	330.867	0.0104446	0.620709
2308	FOXO1	7971177	411.552	0.0140721	255.541	0.00176881	0.620921
8569	MKNK1	7915846	546.69	0.0272746	339.457	0.00203797	0.620931
11278	KLF12	7972003	681.512	0.0167256	423.376	0.00508777	0.62123
100287552	LOC100287552	8136177	755.787	0.00667886	469.627	0.0197545	0.621374
51275	C12orf47	7966441	409.694	0.00469396	254.722	0.0325757	0.621736
259236	TMIE	8079426	1139.33	0.0280256	708.537	0.00571707	0.62189
2055	CLN8	8144267	1099.71	0.035646	684.841	0.0142731	0.622748
22936	ELL2	8113220	559.639	0.0438268	348.635	0.00553801	0.622965
100132406	NBPF10	7912808	643.494	0.00933755	401.327	0.0027061	0.623669
9909	DENND4B	7920354	667.339	0.0139062	416.208	0.0264672	0.623683
57568	SIPA1L2	7925062	512.92	0.00286385	319.963	0.000754258	0.623808
112	ADCY6	7962842	826.528	0.0440007	516.436	0.0142431	0.624825
84249	PSD2	8108453	1920.44	0.0445728	1200.19	0.0161915	0.624954
23650	TRIM29	7952290	1324.14	0.0266829	827.986	0.000403799	0.625303
64110	MAGEF1	8092514	575.249	0.00670757	360.095	0.000947813	0.62598
5930	RBBP6	7994161	319.916	0.000513654	200.286	7.85428e-05	0.626059
55006	TRMT61B	8051226	750.759	0.0337339	470.135	0.0361721	0.626212
2353	FOS	7975779	201	1.45415e-05	125.895	9.39313e-06	0.626343
399744	LOC399744	7927091	586.35	0.00627962	367.281	0.0104294	0.626385
386672	KRTAP10-4	8069142	753.973	0.0474519	472.633	0.0247415	0.626857
1609	DGKQ	8098822	763.808	0.0106587	478.912	0.0141943	0.627006
23049	SMG1	8000222	384.792	0.00450305	241.339	8.55721e-05	0.627194
23049	SMG1	7993999	384.792	0.00450305	241.339	8.55721e-05	0.627194
3070	HELLS	7929438	985.974	0.0418264	618.425	0.0296665	0.627222
2737	GLI3	8139212	344.703	0.0052855	216.281	0.0042427	0.627442
2624	GATA2	8090469	269.444	0.000422968	169.092	0.000326612	0.62756
9191	DEDD	7921793	757.198	0.0342687	475.263	0.00406367	0.62766
55007	FAM118A	8073752	764.806	0.0245498	480.141	0.00112293	0.627794
122945	C14orf148	7980390	1248.27	0.0066727	784.085	0.00132022	0.628135
57478	USP31	8000244	508.133	0.0174965	319.362	0.0026218	0.6285
987	LRBA	8103106	840.775	0.0222359	528.813	0.0143602	0.628959
152006	RNF38	8161192	407.991	0.00872718	256.79	0.0021122	0.629401
27099	C7orf54	8135902	758.335	9.03049e-05	477.3	0.000187003	0.629405
474171	STGC3	8079740	1071.42	0.0222917	674.375	0.0011067	0.629424
10365	KLF2	8026564	738.87	0.0409719	465.198	0.014392	0.629607
80824	DUSP16	7961371	284.706	0.000221234	179.309	0.000123531	0.629805
51592	TRIM33	7918725	544.413	0.0178038	342.919	0.00833928	0.629888
3268	AGFG2	8134834	1136.5	0.0444877	715.915	0.0105482	0.62993
55632	G2E3	7973756	794.904	0.0253944	500.81	0.0137196	0.630025
3480	IGF1R	7986383	526.985	0.00285765	332.019	0.030545	0.630036
644591	PPIAL4G	7919157	1044.25	0.0100632	658.025	0.000571591	0.63014
692195	SNORD75	7922416	207.474	2.51914e-05	130.746	9.30409e-06	0.630182
9468	PCYT1B	8171848	1406.46	0.0179965	886.347	0.0159379	0.630197
57479	PRR12	8030403	534.306	0.012062	336.743	0.000787885	0.630244
8317	CDC7	7902913	665.761	0.00235098	419.798	0.0110017	0.630553
55102	ATG2B	7981217	574.892	0.0215782	362.595	0.0141983	0.630719
1768	DNAH6	8043055	1528.63	0.0299998	964.498	0.000253651	0.630958
3316	HSPB2	7943787	1128.05	0.0471888	712.201	0.00128076	0.631355
84271	POLDIP3	8076465	449.184	0.00315984	283.597	0.00105054	0.631361
8202	NCOA3	8063211	414.783	0.00316826	261.912	0.000196648	0.631442
9674	KIAA0040	7922474	1264.37	0.00311832	798.623	0.0212225	0.631638
90799	CCDC45	8009255	522.603	0.0406818	330.177	0.00045889	0.631794
1428	CRYM	8000117	1446.7	0.0388015	914.394	0.0104722	0.632057
9736	USP34	8052443	881.775	0.0331449	557.463	0.016284	0.632206
54470	ARMCX6	8174086	566.595	0.019289	358.339	0.000101092	0.632443
119016	AGAP4	7927231	597.18	0.00739062	377.718	0.000578583	0.632504
8453	CUL2	7933047	690.746	0.0327018	437.138	0.0403829	0.632848
9937	DCLRE1A	7936408	1077.93	0.0369515	682.179	0.0454637	0.632863
6627	SNRPA1	7991598	167.336	2.53902e-05	105.901	1.99267e-05	0.632864
8805	TRIM24	8136473	557.224	0.0166302	352.678	0.0070822	0.632919
25970	SH2B1	7994445	720.417	0.00526295	456.17	0.0215728	0.633202
3643	INSR	8033362	1239.78	0.044614	785.069	0.00615536	0.633231
130557	ZNF513	8051113	732.75	0.0134964	464.027	0.00988316	0.633268
152485	ZNF827	8103025	282.495	0.000627384	178.912	0.0003677	0.633329
100287934	LOC100287934	7896754	352.924	1.30633e-05	223.634	0.000128869	0.63366
864	RUNX3	7913805	877.692	0.00301619	556.192	0.0218865	0.633698
22868	FASTKD2	8047815	695.505	0.0249971	441.036	0.0226434	0.634123
728936	NBPF16	7919438	610.6	0.00320166	387.249	0.000868208	0.63421
8554	PIAS1	7984453	362.133	0.00155845	229.743	0.000343495	0.634417
25788	RAD54B	8151824	678.706	0.000291352	430.634	0.00383214	0.634493
2483	FRG1	8161509	551.151	0.0290791	349.716	0.0131084	0.63452
7844	RNF103	8053576	597.043	0.0136973	378.916	0.00063027	0.634655
55599	RNPC3	7903404	653.278	0.0320108	414.61	0.011643	0.63466
205717	KIAA2018	8089647	527.412	0.0122683	334.845	0.0209873	0.634884
79665	DHX40	8008825	780.302	0.0228768	495.579	0.0257315	0.635112
9284	NPIP	7993546	457.326	0.00506467	290.482	0.00395366	0.635175
24145	PANX1	7943218	582.128	0.0216782	370.202	0.00120173	0.635946
6654	SOS1	8051670	487.993	0.0049003	310.513	0.00240654	0.636305
51132	RLIM	8173615	575.479	0.0260037	366.497	0.0470935	0.636855
415117	STX19	8089026	1959.52	0.0191327	1248.08	0.00727856	0.63693
55243	KIRREL	7906307	644.383	0.049935	410.515	0.00352127	0.637067
84461	NEURL4	8012166	641.146	0.00224766	408.536	0.00289169	0.637196
2160	F11	8098671	1887.61	0.00540009	1203.23	0.00542977	0.637437
49860	CRNN	7920178	1043.72	0.00816882	665.311	0.000999711	0.637443
79649	MAP7D3	8175369	809.581	0.0375601	516.237	0.0350245	0.63766
259295	TAS2R20	7961285	522.019	1.6677e-07	332.931	2.71454e-06	0.637775
91056	DKFZp761E198	7949490	389.924	0.000209437	248.697	0.000208679	0.637809
8969	HIST1H2AG	8117535	588.525	0.0033941	375.501	0.000979521	0.638037
8603	FAM193A	8093601	294.786	2.09135e-05	188.293	0.0001483	0.638745
81611	ANP32E	7919715	751.157	0.0481292	479.81	0.0363932	0.638761
9698	PUM1	7914296	310.838	0.00103751	198.599	0.000206222	0.638915
26802	SNORD47	7922402	305.068	0.0127024	194.94	0.00662003	0.639004
6427	SFRS2	8018803	408.764	0.00329326	261.206	0.000107372	0.639015
7468	WHSC1	8093539	950.344	0.0280971	607.3	0.00374258	0.639032
57093	TRIM49	7939884	1340.82	0.00409902	857.153	0.0029934	0.639276
5990	RFX2	8033097	538.229	0.00708079	344.252	0.00110052	0.639602
79780	CCDC82	7951144	809.914	0.0356714	518.21	0.0139118	0.639834
84253	GARNL3	8157976	1071.9	0.0230438	686.034	0.00133032	0.640019
7088	TLE1	8161919	415.405	0.00137129	266.047	0.00119454	0.640453
26011	ODZ4	7950701	1406.32	0.0346965	900.9	0.00769999	0.640609
386607	ZFP91-CNTF	7940118	698.907	0.00918497	447.863	0.00412251	0.640805
100287171	WASH1	8159790	654.452	0.0312205	419.405	0.00383162	0.640849
25942	SIN3A	7990487	336.736	0.00351817	215.832	0.000622452	0.640953
5921	RASA1	8106784	588.916	0.00635058	377.673	0.00241966	0.641302
440138	ALG11	7969228	842.914	0.0380045	540.828	0.0197311	0.641617
163786	SASS6	7917976	685.745	0.00130202	439.994	0.0131668	0.64163
123879	DCUN1D3	8000028	453.744	0.00379537	291.162	0.00015866	0.641688
658	BMPR1B	8096511	1881.88	0.00149377	1207.86	0.0183274	0.641838
23597	ACOT9	8171802	616.093	0.0189086	395.469	0.00381605	0.641898
23331	TTC28	8075142	768.074	0.0273726	493.251	0.00941487	0.642192
1490	CTGF	8129562	323.574	0.00884283	207.923	7.32992e-05	0.642581
60496	AASDHPPT	7951435	1462.56	0.0244269	939.884	0.0257295	0.64263
4850	CNOT4	8143088	329.936	0.00439595	212.049	0.00541525	0.642696
170960	ZNF721	8098758	555.201	0.00129506	357.083	0.00985084	0.643159
8831	SYNGAP1	8118696	656.656	0.00105106	422.753	0.00194851	0.643797
2026	ENO2	7953532	1139.57	0.0336835	733.726	0.043785	0.643864
57678	GPAM	7896750	440.006	8.55718e-05	283.458	0.0021804	0.644213
2137	EXTL3	8145624	536.444	0.0166066	345.668	0.00199398	0.644369
116449	CLNK	8099368	3164.95	0.0470117	2039.88	0.00753775	0.644522
65117	RSRC2	7967304	517.609	0.00969168	333.702	0.0015768	0.644699
84464	BTBD12	7999008	621.491	0.0193764	400.76	0.00260177	0.644838
554174	LOC554174	8076744	663.603	0.00671618	428.313	0.00148757	0.645436
84186	ZCCHC7	8155234	616.042	0.0168048	397.744	6.21173e-05	0.645644
168850	ZNF800	8142730	489.341	0.0073734	315.998	0.0118762	0.645762
10403	NDC80	8019857	367.364	0.00445187	237.235	0.00145779	0.645778
162073	ITPRIPL2	7993622	649.348	0.042689	419.449	0.00801313	0.645954
169841	ZNF169	8156529	1288.06	0.0147039	832.208	0.00129298	0.646092
55810	FOXJ2	7953699	414.272	0.00409313	267.677	0.00261794	0.646139
6310	ATXN1	8124040	469.376	0.0024718	303.298	0.000702032	0.646173
9487	PIGL	8005157	852.999	0.0267087	551.213	0.0482374	0.646206
6242	RTKN	8053142	767.432	0.0077179	496.073	0.00564387	0.646407
127829	ARL8A	7923394	404.963	0.0462458	261.783	0.00273049	0.646436
574029	DUSP5P	7910381	775.665	0.0042948	501.568	0.00952842	0.646629
253461	ZBTB38	8083090	487.247	0.0249243	315.068	0.00250579	0.64663
79829	NAA40	7940824	558.963	0.0132115	361.46	0.00859375	0.646662
57678	GPAM	8165663	339.752	0.000131155	219.807	0.00124013	0.646963
27079	RPUSD2	7982753	420.589	1.12943e-06	272.143	7.03516e-06	0.647052
81559	TRIM11	7924868	367.404	0.000249686	237.742	0.000145507	0.647088
10171	RCL1	8154163	562.393	0.0134375	364.059	0.00261193	0.64734
392360	CTSL3	8156240	1563.4	0.0336662	1012.43	0.0193262	0.64758
26820	SNORD24	8159004	441.245	0.0486197	285.823	0.00119403	0.647764
165918	RNF168	8093130	604.76	0.010521	391.745	0.00323978	0.647768
59274	MESDC1	7985349	491.344	0.00423867	318.345	0.0110147	0.647907
84706	GPT2	7995362	676.368	0.0100792	438.442	0.0123258	0.648231
9349	RPL23	8014749	712.034	0.00539888	461.618	0.00579514	0.648309
399975	FLJ45950	7952673	1239.05	0.0488987	803.402	0.0219	0.648403
3280	HES1	8084880	260.636	6.83431e-05	169.028	1.90601e-05	0.648522
90407	TMEM41A	8092534	520.992	0.0482746	338.103	0.00102043	0.648961
4848	CNOT2	7957106	332.485	0.00327763	215.862	0.000469424	0.649238
132660	LIN54	8101411	533.007	0.0134022	346.057	0.00331055	0.649253
23049	SMG1	7994006	580.392	0.00990614	377.019	0.0119925	0.649593
201627	FAM116A	8088348	833.627	0.0499384	541.679	0.0463433	0.649786
5267	SERPINA4	7976481	2030.91	0.0324499	1319.78	0.00492758	0.649846
80339	PNPLA3	8073633	699.91	0.023258	454.894	0.0156012	0.649933
57489	ODF2L	7917433	865.985	0.0299382	563.406	0.0221724	0.650596
5170	PDPK1	7992670	408.426	0.00309559	265.739	0.0013121	0.650641
113178	SCAMP4	8024347	453.686	0.00640828	295.32	0.00557301	0.650933
55038	CDCA4	7981525	307.793	0.000139475	200.484	0.000938884	0.651359
147808	ZNF784	8039530	752.265	0.0298064	490.016	0.00408768	0.651388
651	BMP3	8096070	1560.34	0.0148955	1017.19	0.0210273	0.651898
8877	SPHK1	8010061	395.65	0.00322652	257.928	0.00029187	0.65191
23592	LEMD3	7956842	503.703	0.0035843	328.543	0.000351987	0.652256
54862	CC2D1A	8026217	642.154	0.0408555	419.08	0.00356908	0.652616
5128	CDK17	7965652	540.229	0.0102105	352.718	0.00088487	0.652905
5612	PRKRIR	7950544	508.248	0.00536662	331.891	0.0141427	0.653009
84792	C7orf70	8155332	366.953	0.00146952	239.766	1.76164e-06	0.653396
375316	RBM44	8049552	2039.47	0.021883	1332.61	0.0212465	0.653409
5426	POLE	7967736	826.385	0.0427046	539.979	0.00983637	0.653423
158358	KIAA2026	8160011	298.866	6.27015e-05	195.467	9.52849e-05	0.654027
80139	ZNF703	8145829	265.727	0.000104743	173.876	0.00226244	0.654339
9101	USP8	7983663	649.213	0.0264953	425.048	0.0166802	0.654713
8552	INE1	8167099	283.887	7.38179e-05	185.898	5.44288e-05	0.654831
10153	CEBPZ	8051528	658.249	0.0334945	431.067	0.0320134	0.654869
6497	SKI	7897068	374.122	0.00588395	245.051	0.00253437	0.655004
7405	UVRAG	7942626	397.148	0.000277068	260.188	0.000481602	0.655141
7006	TEC	8100231	603.901	0.000120897	395.696	2.15377e-06	0.655233
200844	C3orf67	8088436	1343.31	0.0158931	880.255	0.0260238	0.65529
2176	FANCC	8162514	1000.11	0.034101	655.836	0.00565212	0.655761
26164	GTPBP5	8063857	403.442	0.000244763	264.595	0.000122682	0.655845
23370	ARHGEF18	8025142	721.995	0.0169277	473.527	0.00693397	0.655859
375748	C9orf102	8156601	682.028	0.0138679	447.438	0.0016702	0.65604
168374	ZNF92	8133089	639.96	2.54475e-05	419.963	0.00533108	0.656233
259290	TAS2R31	7961291	542.045	4.77262e-07	355.78	1.11118e-07	0.656365
10381	TUBB3	7998063	478.311	0.0237095	314.035	0.00545992	0.656551
64319	FBRS	7994874	457.585	0.0206079	300.459	0.00518111	0.656618
55922	NKRF	8174684	377.278	4.0383e-05	247.823	0.000143335	0.656871
115352	FCRL3	7921275	1225.05	0.00276873	804.755	6.15067e-05	0.656917
2241	FER	8107208	893.767	0.0472201	587.212	0.0206284	0.657008
84306	PDCD2L	8027642	389.453	0.00155538	256.011	0.0084216	0.657361
10240	MRPS31	7971184	425.061	0.00592086	279.504	0.0124939	0.657564
1763	DNA2	7934026	764.508	0.0111166	502.925	0.0160962	0.657841
9670	IPO13	7900888	546.327	0.0166039	360.003	0.0273333	0.658951
7942	TFEB	8126312	625.778	0.000864036	412.632	0.004329	0.659391
220594	LOC220594	8005689	665.141	0.0047642	438.998	0.0399456	0.660007
55623	THUMPD1	8000003	508.934	0.015524	335.914	0.00727237	0.660034
677838	SNORA61	7914212	222.191	0.00228903	146.683	0.000229196	0.660165
6575	SLC20A2	8150537	440.132	0.00462477	290.658	0.000180749	0.660387
597	BCL2A1	7990818	1699.98	0.0482622	1123.03	0.00585772	0.660615
65012	SLC26A10	7956573	660.443	0.0018148	436.71	0.0131943	0.661238
9726	ZNF646	7995033	733.652	0.00324176	485.188	0.000536498	0.661332
100130872	LOC100130872	8098877	1264.18	0.0445552	836.525	0.0151553	0.661712
7726	TRIM26	8179638	476.719	0.00521319	315.586	0.000405485	0.661997
81932	HDHD3	8163505	403.489	0.000120158	267.162	1.48139e-05	0.662129
9923	ZBTB40	7898750	480.803	0.000504256	318.412	0.00151313	0.662251
5334	PLCL1	8047248	1242.59	0.00304272	823.135	0.0124185	0.662437
5243	ABCB1	8140782	1000.16	0.00158039	662.716	0.0204239	0.662613
58487	CREBZF	7950796	401.379	0.000413564	265.997	0.000812685	0.662709
1671	DEFA6	8149104	2053.23	0.031322	1361.47	0.0050878	0.663086
57162	PELI1	8052654	357.638	5.29441e-05	237.197	3.69922e-05	0.663232
25836	NIPBL	8104944	776.993	0.0251015	515.42	0.0104393	0.663352
83608	C18orf21	8020919	529.337	0.0100688	351.178	0.0150894	0.66343
65008	MRPL1	8095894	557.812	0.0274922	370.079	0.0244171	0.663448
10002	NR2E3	7984606	1276.51	0.0113066	847.037	0.00719003	0.663557
124871	FLJ40194	8008195	1675.2	0.0161681	1112.58	0.000885852	0.66415
535	ATP6V0A1	8007228	483.172	0.00359009	321.125	0.00128258	0.664618
285331	CCDC66	8080621	909.824	0.00144068	604.789	0.0311201	0.664732
54968	TMEM70	8146930	681.481	0.0104832	453.317	0.00919053	0.665193
257177	C1orf192	7921862	1561.79	0.0111958	1038.98	0.0118207	0.665249
387748	OR56B1	7938049	1661.25	0.0266958	1105.59	0.000411624	0.66552
83439	TCF7L1	8043114	386.648	0.0110751	257.367	0.0067697	0.665638
9473	C1orf38	7899394	1007.37	0.0165041	670.619	0.0059339	0.665712
10785	WDR4	8070615	618.642	0.0134175	411.871	0.000793726	0.665766
283303	C11orf36	7937876	566.458	0.00316882	377.129	0.000329217	0.665767
56946	C11orf30	7942650	430.393	0.00523236	286.585	0.00303359	0.665867
494335	MIR423	8006119	886.747	0.010561	590.541	0.000756329	0.665964
219988	PATL1	7948399	383.175	0.00543323	255.295	0.00125132	0.666261
100124536	SNORA38B	8009380	934.748	0.0367854	622.857	0.00815471	0.666337
3592	IL12A	8083690	1523.73	0.0323643	1015.56	0.0301073	0.666495
55320	C14orf106	7978776	605.406	0.0251718	403.575	0.0390133	0.666618
1022	CDK7	8177462	370.018	0.00308436	246.716	0.00334475	0.666768
1022	CDK7	8105862	370.018	0.00308436	246.716	0.00334475	0.666768
55809	TRERF1	8126402	625.613	0.0170014	417.18	0.000869807	0.666834
56652	C10orf2	7929901	420.85	6.75028e-06	280.757	0.000451426	0.667119
7422	VEGFA	8119898	491.623	0.00904364	328.002	0.00359406	0.667181
2073	ERCC5	7969935	797.44	0.042831	532.053	0.0108694	0.667201
10006	ABI1	7932616	626.253	0.0211225	418.092	0.0140204	0.667609
406989	MIR206	8120206	1613.84	0.0461819	1077.69	0.0166438	0.66778
54778	RNF111	7983953	346.299	0.00128844	231.254	0.000281655	0.667789
57827	C6orf47	8124994	612.775	0.00563778	409.23	4.6918e-05	0.66783
65979	PHACTR4	7899455	424.188	0.0180426	283.589	0.00918906	0.668547
406954	MIR181A2	8157800	1031.3	0.00109032	689.974	0.000724938	0.669033
79659	DYNC2H1	7943442	701.985	0.00624769	469.744	0.0169139	0.669165
160851	DGKH	7968800	726.903	0.0154018	486.809	0.00505544	0.669704
121130	OR10P1	7956007	1446.11	0.0259338	968.559	0.00811596	0.66977
2796	GNRH1	8149849	1210.16	0.0160457	810.608	0.00907105	0.669835
167359	MGC42105	8105146	925.992	0.0160392	620.496	0.00108964	0.670088
5287	PIK3C2B	7923662	941.125	0.0241247	630.71	0.0250808	0.670165
50838	TAS2R13	7961275	567.402	1.83738e-05	380.262	8.64817e-06	0.67018
8930	MBD4	8090577	619.603	0.00801164	415.36	0.0127259	0.670365
30061	SLC40A1	8057677	1007	0.0360561	675.346	0.00229169	0.670651
200879	LIPH	8092541	1276.41	0.00506149	856.101	0.021255	0.670712
3621	ING1	7970096	559.815	0.00272545	375.636	2.69896e-05	0.671
80205	CHD9	7995583	502.833	0.00488275	337.407	0.000355377	0.671013
79986	ZNF702P	8039025	1538.54	0.0328901	1032.52	0.00180682	0.671103
80006	C5orf44	8105661	1133.14	3.20035e-05	761.054	0.000872868	0.671631
79153	GDPD3	8000799	1452.7	0.0466918	976.409	0.0149164	0.672132
2767	GNA11	8024566	433.95	0.0125007	291.926	0.00595945	0.672719
1119	CHKA	7949916	675.252	0.00927774	454.302	0.0309943	0.672789
23046	KIF21B	7923233	1482.56	0.0379424	997.479	0.0150807	0.672806
80028	FBXL18	8137964	537.681	0.00990492	361.786	0.0088762	0.672863
5291	PIK3CB	8091009	647.472	0.00590372	435.734	0.00662842	0.672978
2844	GPR21	8157727	449.838	1.20602e-05	302.761	3.06298e-06	0.673043
11187	PKP3	7937363	816.15	0.00450543	549.332	0.00660461	0.673078
121536	AEBP2	7954279	707.817	0.00976754	476.523	0.0121	0.673229
221785	ZNF498	8134644	404.815	5.90603e-06	272.551	0.000648166	0.673275
50840	TAS2R14	7961279	598.671	0.00182245	403.105	0.00024576	0.673333
220869	CBWD5	8155422	673.82	0.0234639	453.943	0.00705036	0.673686
79612	NAA16	7968761	688.083	0.0225225	463.583	0.0311529	0.673731
100134868	LOC100134868	8061483	712.38	0.00479602	479.987	0.000187067	0.67378
57496	MKL2	7993310	747.383	0.0416993	503.7	0.0176819	0.673951
22880	MORC2	8075430	483.445	0.00194225	325.882	0.000399423	0.674082
5502	PPP1R1A	7963826	661.785	0.0104937	446.139	0.0191018	0.674145
283450	C12orf51	7966517	711.802	0.00569051	480.129	0.000813684	0.674525
27094	KCNMB3	8092241	1139.64	0.0411457	769.165	0.0328448	0.674917
10884	MRPS30	8105181	417.583	0.00307303	281.979	0.00196047	0.675266
388796	LOC388796	8066247	357.538	0.000222269	241.551	2.04799e-05	0.675596
2794	GNL1	8124742	876.449	0.0209553	592.354	0.0306512	0.675857
80862	NCRNA00171	8178324	915.382	0.00179256	618.744	0.00781766	0.67594
57700	FAM160B1	7930682	449.045	0.00531563	303.588	0.00029097	0.676075
23451	SF3B1	8058024	676.45	0.0272651	457.444	0.0424523	0.676242
64409	WBSCR17	8133258	1774.49	0.0488664	1200.19	0.00202684	0.67636
9704	DHX34	8029918	516.709	0.00630322	349.527	0.0152132	0.676448
5470	PPEF2	8101065	1260.36	0.00690635	852.818	0.00310365	0.676647
10194	TSHZ1	8021768	467.461	0.017815	316.323	0.00203687	0.676684
55209	SETD5	8077528	333.651	0.00294651	225.798	0.000272116	0.676748
100133941	CD24	8177222	949.727	0.000360394	642.767	0.0347485	0.676791
51602	NOP58	8047518	758.975	0.0376534	513.828	0.0397477	0.677002
8100	IFT88	7967933	786.436	0.0191713	532.424	0.00199688	0.677008
149420	PDIK1L	7899087	429.372	1.80044e-05	290.711	0.00254755	0.677061
81602	CDADC1	7969096	804.361	0.0148284	544.726	0.0158419	0.677215
100133280	LOC100133280	8112476	527.175	0.00485373	357.079	0.00116933	0.677346
205428	C3orf58	8083223	553.822	0.00670085	375.135	0.00242351	0.677356
93643	TJAP1	8119829	601.68	0.0221499	407.596	0.00488709	0.677429
57695	USP37	8058940	578.967	0.00145627	392.225	0.0214191	0.677456
60313	GPBP1L1	7915758	647.686	0.0165972	438.782	0.0125078	0.67746
4300	MLLT3	8160332	736.384	0.0318888	498.971	0.0167237	0.677596
9946	CRYZL1	8070141	727.694	0.0183936	493.453	0.02249	0.678105
54665	RSBN1	7918681	362.689	2.38445e-05	246.011	0.000163612	0.678298
57580	PREX1	8066848	1037.94	0.0308042	704.499	0.00526008	0.678749
9020	MAP3K14	8016194	493.737	0.000870586	335.238	6.46982e-05	0.67898
53353	LRP1B	8055496	2332.39	0.000942453	1583.71	0.000510732	0.679009
5652	PRSS8	8001007	1179.22	0.0255721	800.815	0.0403654	0.679106
3670	ISL1	8105220	372.404	2.4283e-06	252.907	1.34469e-05	0.679121
221264	AKD1	8128788	2356.78	0.0413172	1600.89	0.00401793	0.679271
155060	ZNF783	8137118	1108.73	0.0414377	753.167	0.0218294	0.679307
57623	ZFAT	8153043	645.306	0.00245301	438.477	0.00514633	0.679487
246734	NPCDR1	8088468	2118.94	0.0407028	1439.88	0.000773562	0.679525
94027	CGB7	8038299	923.69	0.0142133	628.276	0.0126676	0.680181
389517	SPDYE8P	8140009	798.948	0.0225391	543.432	0.00819777	0.680184
389517	SPDYE8P	8133600	798.948	0.0225391	543.432	0.00819777	0.680184
27291	C10orf28	7929719	728.83	0.0189491	495.796	0.0034165	0.680262
92292	GLYATL1	7940135	1906.4	0.044429	1296.91	0.00456549	0.68029
9821	RB1CC1	8150757	577.644	0.0184456	392.988	0.00490561	0.680329
10260	DENND4A	7989849	629.965	0.0206938	428.841	0.0311546	0.680739
9367	RAB9A	8166098	452.378	0.0150507	308.01	0.00046747	0.680869
2050	EPHB4	8141625	530.436	0.0101179	361.163	0.00839973	0.680879
51090	PLLP	8001547	1095	0.044997	745.585	0.0431492	0.680902
126637	TCHHL1	7920135	1671.46	0.0369804	1138.11	0.00844747	0.680907
128239	IQGAP3	7921033	775.716	0.0216756	528.268	0.00467423	0.681007
7516	XRCC2	8144036	640.419	0.00184436	436.2	0.013604	0.681117
4337	MOCS1	8126214	771.821	0.027197	525.789	0.0150617	0.681232
10817	FRS3	8126337	967.81	0.0468842	659.7	0.00587825	0.681642
92797	HELB	7956894	1118.42	0.00824272	762.381	0.0272685	0.681661
5151	PDE8A	7985662	549.028	0.0413841	374.548	0.000370091	0.682202
5139	PDE3A	7954293	2359.31	0.014995	1609.91	0.00767757	0.682365
7757	ZNF208	8035819	1810.32	0.0264026	1235.43	0.00711547	0.682436
55835	CENPJ	7970624	562.158	0.00239924	383.685	0.0122486	0.682521
84936	ZFYVE19	7982812	870.992	0.0274453	594.741	0.00773003	0.682831
653129	PTPN20A	7933437	2474.78	0.0488524	1690.12	0.0122085	0.682938
84961	FBXL20	8014825	830.506	0.0337817	567.28	0.00991133	0.683054
23327	NEDD4L	8021376	439.381	0.00331619	300.156	0.00707727	0.683133
123264	OSTBETA	7984245	1544.1	0.0114549	1054.88	0.00502836	0.683169
23094	SIPA1L3	8028286	525.775	0.0152088	359.497	0.00228828	0.683747
10124	ARL4A	8131573	621.836	0.0181375	425.278	0.000475311	0.683908
23409	SIRT4	7959148	686.943	0.000344466	469.814	0.0006104	0.683921
10270	AKAP8	8035007	604.074	0.0120436	413.401	0.000570577	0.684355
5795	PTPRJ	7939839	574.129	0.0281904	392.945	0.00207824	0.684419
8772	FADD	7942168	295.643	0.000131527	202.391	1.30491e-05	0.684578
100290146	LOC100290146	8001104	1306.8	0.0154171	895.009	0.00535748	0.684887
346288	2011-09-14	7911347	830.486	0.0280645	568.923	0.0269485	0.685049
346288	2011-09-14	8085054	830.486	0.0280645	568.923	0.0269485	0.685049
346288	2011-09-14	8148964	830.486	0.0280645	568.923	0.0269485	0.685049
346288	2011-09-14	7896742	830.486	0.0280645	568.923	0.0269485	0.685049
346288	2011-09-14	7945342	830.486	0.0280645	568.923	0.0269485	0.685049
346288	2011-09-14	8137666	830.486	0.0280645	568.923	0.0269485	0.685049
346288	2011-09-14	8110670	830.486	0.0280645	568.923	0.0269485	0.685049
346288	2011-09-14	8031990	830.486	0.0280645	568.923	0.0269485	0.685049
100302189	MIR1977	7911339	128.6	0.0169733	88.1026	0.0086606	0.685091
100302189	MIR1977	8165698	128.6	0.0169733	88.1026	0.0086606	0.685091
10020	GNE	8161174	478.8	0.0006814	328.099	0.000285043	0.685252
3225	HOXC9	7955865	638.007	0.011209	437.282	8.66524e-05	0.685387
5383	PMS2L5	8140258	531.187	0.0235826	364.092	0.00522317	0.68543
197320	ZNF778	7997904	300.656	0.0165531	206.142	0.00955575	0.68564
83605	CCM2	8132646	707.131	0.0342967	484.965	0.0023023	0.685821
6839	SUV39H1	8167347	473.252	0.00121703	324.604	0.00173796	0.685901
3660	IRF2	8103911	347.247	0.000648011	238.209	7.70937e-05	0.685995
93973	ACTR8	8088151	737.266	0.0397193	505.918	0.00304485	0.686208
642947	LOC642947	8156022	1128.59	0.0167359	774.478	0.00128139	0.686238
57655	GRAMD1A	8027701	472.2	0.0328818	324.123	0.00228112	0.68641
64718	UNKL	7998457	898.389	0.0093265	616.787	0.00405503	0.686548
84750	FUT10	8150165	737.536	0.0333458	506.554	0.0120974	0.686819
10522	DEAF1	7945503	684.515	0.0382938	470.243	0.0177265	0.686973
79869	CPSF7	7948574	362.44	0.000780971	249.071	0.00253487	0.687206
2086	ERV3	8139840	614.874	0.00719265	422.848	0.000639529	0.687699
339559	ZNF642	7900446	634.426	0.000330664	436.351	9.6271e-05	0.687789
283080	C10orf126	7926882	2014.12	0.0307915	1385.68	0.00482567	0.687986
387264	KRTAP5-1	7937698	721.794	0.0112521	496.748	0.0101209	0.688213
10213	PSMD14	8045946	708.151	0.0472244	487.369	0.0382594	0.688228
4650	MYO9B	8026638	657.516	0.0461935	452.883	0.0252838	0.68878
83548	COG3	7968931	746.272	0.035351	514.2	0.0129875	0.689025
6478	SIAH2	8091485	305.484	0.000159755	210.562	0.00142942	0.689273
84465	MEGF11	7989887	651.266	0.0261906	449.472	0.00325717	0.690151
6676	SPAG4	8062190	1405.06	0.0387757	970.119	0.0246465	0.690446
54556	ING3	8135718	639.75	0.0216437	442.076	0.00765628	0.691014
55924	C1orf183	7918552	658.686	0.00123881	455.26	0.000102982	0.691164
6347	CCL2	8006433	372.742	0.0171833	257.656	0.00148447	0.691247
23389	MED13L	7966706	390.832	0.00353584	270.287	0.00118202	0.691568
57035	C1orf63	7913824	590.713	0.0445478	408.579	0.0372292	0.69167
57670	KIAA1549	8143247	460.544	0.00462438	318.617	0.00154595	0.691829
4987	OPRL1	8064261	1351.63	0.0327904	935.276	0.00765821	0.691963
84283	TMEM79	7906146	827.686	0.00956295	572.79	0.000257914	0.692038
10038	PARP2	7973036	504.772	0.00898162	349.335	0.00619802	0.692064
389289	C5orf39	8111925	761.577	0.000613284	527.38	0.000894202	0.692484
50488	MINK1	8003991	444.777	0.0191585	308.143	0.00845856	0.692803
11188	NISCH	8080320	583.445	0.0123376	404.238	0.00315612	0.692846
80232	WDR26	7924582	556.07	0.0276963	385.472	0.00829704	0.693208
133957	CCDC127	8110678	438.145	0.00748957	303.828	5.60235e-05	0.693442
3727	JUND	8035445	441.648	0.0262249	306.452	0.00706435	0.693882
440689	HIST2H2BF	7919584	351.144	0.000787489	243.686	5.19371e-05	0.693977
57582	KCNT1	8159283	1179.13	0.0180642	818.383	0.0122736	0.694058
7507	XPA	8162696	733.106	0.0352244	508.946	0.0272232	0.694233
23649	POLA2	7941214	582.521	0.021972	404.449	0.00224622	0.694308
114044	MCM3APAS	8069332	866.42	0.00309766	601.731	0.00439792	0.694503
10184	LHFPL2	8112803	553.271	0.0148449	384.736	0.000213485	0.695384
64282	PAPD5	7995479	676.056	0.0445016	470.135	0.0239978	0.695409
25888	ZNF473	8030569	460.398	2.18287e-06	320.277	4.37667e-05	0.695653
4246	SCGB2A1	7940626	1124.24	0.0173034	782.467	0.0147839	0.695997
440	ASNS	8141150	519.006	0.0236923	361.326	0.0351485	0.69619
51427	ZNF107	8133049	571.701	0.00219815	398.019	0.000967331	0.696201
79991	OBFC1	7936134	655.488	0.0270123	456.477	0.0288742	0.696394
5834	PYGB	8061447	620.819	0.0353902	432.39	0.0056693	0.696484
388677	NOTCH2NL	7904702	416.088	0.00359861	289.845	0.000188151	0.696596
22906	TRAK1	8079037	517.654	0.0138663	360.727	0.00132731	0.696849
55122	AKIRIN2	8128034	257.928	0.00228184	179.803	0.00110322	0.697104
203562	TMEM31	8169056	1130.8	0.00435212	788.826	0.000414739	0.69758
5970	RELA	7949465	359.436	0.0087366	250.834	0.00946587	0.697853
163486	DENND1B	7923131	796.871	0.011898	556.202	0.0080742	0.697983
54471	SMCR7L	8073135	505.456	0.000597645	352.821	0.00533076	0.698026
266747	RGL4	8071717	1351.24	0.0319044	943.446	0.0189545	0.698209
677833	SNORA54	7945801	745.305	0.000751841	520.497	0.000383056	0.698367
9697	TRAM2	8127051	515.891	0.0151741	360.456	0.00041773	0.698707
51174	TUBD1	8017150	569.277	0.00203176	397.911	0.00744208	0.698976
728957	ZNF705D	8144691	3171.75	0.0396057	2217.28	0.0250639	0.699072
4303	FOXO4	8168205	779.624	0.0149003	545.023	0.0380259	0.699085
100129831	LOC100129831	8024444	959.646	0.00636293	670.913	0.000656153	0.699126
408	ARRB1	7950473	514.865	0.0222764	359.973	0.00843089	0.69916
27329	ANGPTL3	7901883	2982.91	0.0120151	2085.81	0.00704678	0.699255
283401	FLJ33996	7955533	810.451	0.0248743	566.743	0.00712824	0.699293
1488	CTBP2	7936904	773.153	0.0368461	540.798	0.00259419	0.699471
154043	CNKSR3	8130422	458.409	0.0022809	320.892	0.000848162	0.700011
55471	C2orf56	8041495	712.454	0.0127548	498.754	0.0281543	0.700051
2043	EPHA4	8059279	277.77	0.00029093	194.476	2.33656e-05	0.700134
54583	EGLN1	7925048	681.609	0.0450978	477.49	0.0372479	0.700534
80345	ZSCAN16	8117640	975.26	0.00642932	683.243	0.0159469	0.700576
5565	PRKAB2	7919305	787.151	0.0372278	551.509	0.019672	0.70064
9986	RCE1	7941732	458.862	0.000823304	321.799	0.00462589	0.701297
2018	EMX2	7930857	790.623	0.011246	554.501	0.00064912	0.701347
541468	C1orf190	7901187	566.054	0.00769477	397.03	0.00312332	0.7014
2072	ERCC4	7993298	599.553	0.00157918	420.567	0.00250461	0.701468
27342	RABGEF1	8133176	494.599	0.0117458	347.001	0.000581184	0.701582
7204	TRIO	8104506	477.283	0.00909602	334.866	0.0001362	0.70161
5324	PLAG1	8150881	488.703	0.0041175	342.935	0.00212732	0.701726
2779	GNAT1	8079919	1188.17	0.042933	833.809	0.00358667	0.701761
8535	CBX4	8019018	376.724	0.000822456	264.434	0.000309107	0.70193
7205	TRIP6	8134981	507.63	0.00557248	356.429	0.000555071	0.702143
22863	KIAA0831	7979328	432.265	0.00352851	303.512	3.92335e-05	0.702144
51069	MRPL2	8126512	338.645	0.000760489	237.852	0.000312356	0.702365
1797	DOM3Z	8179926	632.855	0.0389286	444.749	0.034641	0.702766
440163	RNASE13	7977642	1790.98	0.034868	1258.66	0.00366513	0.702777
145508	C14orf145	7980496	834.694	0.00398714	586.636	0.0125801	0.702816
10221	TRIB1	8148304	164.653	1.07358e-05	115.726	0.000108647	0.702846
100129449	LOC100129449	8055911	1794.68	0.0358763	1261.82	0.024831	0.70309
22841	RAB11FIP2	7936567	735.395	0.0333211	517.434	0.0167434	0.703614
55626	AMBRA1	7947652	499.23	0.000809185	351.361	0.00017916	0.703807
23075	SWAP70	7938370	945.679	0.0431508	665.731	0.0297338	0.703972
126382	NR2C2AP	8035628	719.568	0.00307022	506.644	0.00111098	0.704096
388364	TMIGD1	8014025	2473.67	0.0327227	1743.24	0.0122293	0.704715
51185	CRBN	8085081	807.397	0.0384196	569.114	0.0100548	0.704875
9129	PRPF3	7905171	491.233	0.0192757	346.378	0.0157483	0.705121
57620	STIM2	8094501	603.529	0.0254729	425.589	0.00698296	0.705167
11056	DDX52	8014574	577.971	0.0133003	407.607	0.0214288	0.705238
284001	CCDC57	8019437	1144.09	0.014484	806.863	0.00301789	0.705244
55206	SBNO1	7967420	541.363	0.00732778	381.924	0.00401174	0.705487
57665	RDH14	8050474	402.542	0.000448038	284.044	9.02053e-06	0.705625
10042	HMGXB4	8072645	338.124	0.000810871	238.656	0.0001895	0.705824
2619	GAS1	8162179	516.04	0.0027428	364.353	0.000934735	0.706057
1846	DUSP4	8150076	505.304	5.54128e-05	356.815	0.000828066	0.70614
54785	C17orf59	8012397	534.892	0.00283612	377.736	0.0005691	0.706191
119016	AGAP4	7933252	682.91	0.0092657	482.299	0.00448868	0.706241
1601	DAB2	8111772	579.185	0.0360369	409.081	0.00298973	0.706304
8325	FZD8	7933075	569.094	0.00876751	401.973	0.00365275	0.706338
53940	FTHL17	8171917	1022.39	0.0470056	722.287	0.0110928	0.706472
129401	NUP35	8046804	664.068	0.0325246	469.555	0.0336021	0.707089
50839	TAS2R10	7961249	807.604	0.000286211	571.049	0.0159665	0.70709
401250	MCCD1	8179246	1077.65	0.0441307	762.153	0.00124097	0.707236
401250	MCCD1	8177964	1077.65	0.0441307	762.153	0.00124097	0.707236
127002	ATXN7L2	7903676	537.825	0.00275084	380.555	0.00196587	0.707582
115201	ATG4A	8169291	2901.9	0.0280763	2053.35	0.00650157	0.707586
84890	ADO	7927767	706.948	0.0387365	500.403	0.00163854	0.707836
11094	C9orf7	8159078	800.626	0.0357983	566.761	0.00958059	0.707898
79706	PRKRIP1	8135162	641.541	0.0216551	454.196	0.00109748	0.707977
55005	RMND1	8130191	940.699	0.024694	666.051	0.0289491	0.708039
8029	CUBN	7932326	1979.96	0.0269865	1402.31	0.00375004	0.708252
619570	SNORD95	8116532	311.548	0.0134871	220.716	0.0032947	0.70845
90362	FAM110B	8146533	584.05	5.47352e-05	413.808	9.61758e-05	0.708515
9321	TRIP11	7980923	791.325	0.0420415	560.698	0.00230329	0.708556
26246	OR2L2	7911252	2315.93	0.0270707	1641.01	0.00844196	0.708574
10082	GPC6	7969613	903.487	0.0419173	640.413	0.00528437	0.708824
9945	GFPT2	8116418	800.221	0.0203341	567.522	0.00545254	0.709207
6621	SNAPC4	8165131	435.542	0.000321651	308.907	0.0012971	0.709246
9904	RBM19	7966638	712.962	0.0147043	505.96	0.0086344	0.70966
79848	CSPP1	8146756	697.346	0.00184867	494.944	0.00530526	0.709754
10603	SH2B2	8135149	609.74	0.00618145	432.802	0.00852312	0.709815
55251	PCMTD2	7927095	572.718	0.0228702	406.825	0.0351881	0.710341
84437	KIAA1826	7951422	557.92	0.0438	396.344	0.00107144	0.710395
6491	STIL	7915926	471.86	0.00219086	335.358	0.00022556	0.710716
54521	WDR44	8169519	749.81	0.0151973	533.068	0.0212204	0.710937
677803	SNORA15	8132962	772.806	2.76607e-06	549.522	0.00267721	0.711074
54891	INO80D	8058415	474.888	0.00286736	337.944	0.000550778	0.711629
10620	ARID3B	7984843	634.019	0.00530532	451.29	0.0107558	0.711794
677827	SNORA46	8001746	527.362	0.0087461	375.447	0.00335023	0.711934
27086	FOXP1	8088776	537.231	0.0100016	382.488	0.000450965	0.711962
4297	MLL	7944223	394.511	0.000639423	280.973	0.000119019	0.712206
11266	DUSP12	7906810	663.417	0.0393896	472.534	0.0145128	0.712272
172	AFG3L1	7998083	1174.54	0.00610614	836.85	0.00143993	0.71249
692075	SNORD6	7951030	590.227	0.00159517	420.708	3.00585e-05	0.71279
8629	JRK	8153328	510.276	0.0135844	363.75	0.00358265	0.71285
129790	C7orf13	8144082	481.683	0.000735741	343.481	0.000198135	0.713085
25983	NGDN	7973414	333.325	0.0051493	237.722	0.00510169	0.713184
284565	NBPF15	7904976	569.765	0.00390114	406.384	0.00067831	0.713248
90317	ZNF616	8038952	657.219	0.00360423	468.84	0.00188666	0.713369
5144	PDE4D	8112220	988.112	0.00283395	705.184	0.00249074	0.713668
49856	WDR8	7911839	654.371	0.0159455	467.027	0.00194929	0.713704
389517	SPDYE8P	8139996	762.584	0.0193197	544.721	0.005425	0.714309
387990	TOMM20L	7974647	1853.17	0.0481456	1324.15	0.0218802	0.714528
3678	ITGA5	7963786	607.112	0.035303	433.82	0.00577245	0.714563
6423	SFRP2	8103254	1475.32	0.0373455	1054.37	0.00368673	0.714673
7705	ZNF146	8028186	450.497	0.0019669	322	0.010781	0.714766
755	C21orf2	8069083	779.703	0.019636	557.353	0.00477227	0.714827
55037	PTCD3	8043251	526.834	0.0125075	376.796	0.0124938	0.715208
2669	GEM	8151816	268.74	1.70142e-05	192.315	0.000325769	0.715619
728788	CCDC29	7970381	1464	0.0217167	1047.86	0.0254786	0.715751
23025	UNC13A	8035318	1195.49	0.00393558	856.031	0.00525691	0.716052
644353	ZCCHC18	8169083	1021.57	0.00357485	731.683	0.0288698	0.716235
6541	SLC7A1	7970810	366.847	0.00297504	262.781	0.00117285	0.716324
2668	GDNF	8111670	466.792	0.000662498	334.48	0.00145168	0.716551
6482	ST3GAL1	8153021	423.481	0.000798552	303.553	0.000732215	0.716805
29931	LOH3CR2A	8077499	1145.51	0.00536703	821.371	0.00304087	0.717038
2526	FUT4	7943236	474.984	0.00128675	340.721	0.000142897	0.717331
137994	LETM2	8145942	847.924	0.0161045	608.432	0.000417858	0.717555
8365	HIST1H4H	8124448	331.779	0.0115459	238.137	0.00186308	0.717758
121053	C12orf45	7958211	412.157	0.00783723	295.838	0.0199482	0.71778
55061	SUSD4	7924508	821.667	0.000508537	589.793	0.0104477	0.717801
92106	OXNAD1	8078173	736.747	0.0323904	528.879	0.0143404	0.717857
6168	RPL37A	8048195	555.242	0.0104643	398.685	0.00479032	0.718039
9394	HS6ST1	8055130	608.55	0.0271379	437.307	0.00925593	0.718604
1039	CDR2	8000236	286.494	8.45381e-05	205.973	9.60019e-05	0.718942
81628	TSC22D4	8141526	449.793	0.00127303	323.508	0.0031067	0.719237
23064	SETX	8164701	551.498	0.00730683	396.836	0.00123808	0.719561
80032	ZNF556	8024527	1144.28	0.00754491	823.473	0.00249587	0.719641
548644	POLR2J3	8141795	477.383	0.0208719	343.567	0.0019856	0.719689
353116	RILPL1	7967463	744.919	0.0259342	536.161	0.0105996	0.719758
100130193	LOC100130193	7898568	2379.7	0.0284706	1712.98	0.0460839	0.719829
6838	SURF6	8164862	618.249	0.0017261	445.045	0.00642509	0.719848
9266	CYTH2	8030049	469.043	0.000605687	337.972	0.000674927	0.720556
121551	BTBD11	7958352	1511.48	0.00508514	1089.37	0.0286385	0.720731
79918	SETD6	7996241	801.307	0.0269046	577.582	0.0243373	0.7208
10036	CHAF1A	8024843	538.326	0.00226581	388.047	0.0076289	0.72084
4277	MICB	8177955	485.522	0.00597066	350.136	0.000131241	0.721153
8568	RRP1	8068938	571.114	0.00563076	412.112	0.00519643	0.721592
94015	TTYH2	8009568	1152.56	0.00362305	831.699	0.0192897	0.721609
1959	EGR2	7933872	638.184	0.000835678	460.583	0.00190251	0.721709
134353	LSM11	8109585	726.09	0.00391662	524.028	0.0153491	0.721712
80778	ZNF34	8153896	1112.72	0.0213939	803.338	0.000530146	0.721958
9314	KLF4	8163002	239.908	1.2872e-05	173.249	0.000299463	0.722148
57730	ANKRD36B	8053834	503.693	0.0268214	363.742	0.00163096	0.722151
84541	KBTBD8	8080911	871.357	0.00238495	629.303	0.0115491	0.722211
1762	DMWD	8037679	557.644	0.0146971	402.786	0.0150433	0.7223
56981	PRDM11	7939569	1277.01	0.0346955	922.695	0.00477584	0.722543
57701	NCKAP5L	7963121	709.097	0.0345708	512.386	0.0295718	0.722589
7026	NR2F2	7986329	441.78	0.0218779	319.29	0.00808325	0.722735
57215	THAP11	7996675	467.967	0.00214102	338.266	0.00144375	0.722841
7576	ZNF28	8038993	752.195	0.0424341	543.756	0.0166108	0.722892
54850	FBXL12	8033813	513.312	0.0127681	371.235	0.000628422	0.723215
55238	SLC38A7	8001750	715.236	0.036836	517.305	0.0136794	0.723265
55343	SLC35C1	7939590	453.048	0.0189052	327.818	0.00220207	0.723585
54931	RG9MTD1	8081343	410.299	0.000421921	296.982	0.00875926	0.723818
26130	GAPVD1	8157858	680.412	0.01152	492.733	0.0108489	0.724168
124995	MRPL10	8016366	430.287	0.0115143	311.7	0.00123319	0.724401
10481	HOXB13	8016487	1054.21	0.00803797	764.272	0.00128464	0.724973
1977	EIF4E	8101839	835.479	0.00384962	606.214	0.00232966	0.725588
89839	ARHGAP11B	7982287	359.177	0.00467252	260.868	0.00365243	0.726295
84719	C1orf217	7908966	875.539	0.0103102	635.914	0.000519199	0.726311
112840	WDR89	7979565	473.738	0.000133005	344.21	0.0007421	0.726582
23492	CBX7	8076185	1371	0.0376804	996.651	0.0212276	0.726952
284352	LRRC68	8029624	751.136	0.0259684	546.391	0.00997869	0.72742
78994	PRR14	7994858	590.221	0.0301091	429.729	0.0209726	0.728082
81608	FIP1L1	8095048	390.961	0.00558008	284.758	0.00178745	0.728354
57558	USP35	7942798	772.483	0.0148614	562.767	0.00496549	0.728517
22847	ZNF507	8027439	654.136	0.0331161	476.575	0.00796848	0.728557
728661	SLC35E2	7911591	358.695	0.000462712	261.399	0.00112451	0.728749
100132099	LOC100132099	7969794	644.474	0.000103186	469.684	0.000646419	0.728786
85365	ALG2	8162827	495.822	0.0294476	361.381	0.00376333	0.728853
84455	EFCAB7	7901931	1069.66	0.0203001	779.798	0.0230141	0.729015
23160	WDR43	8041149	349.498	0.000970298	254.898	0.00139117	0.729326
147081	C17orf69	8007803	865.306	0.0321052	631.236	0.0378271	0.729494
8110	DPF3	7979963	814.078	0.00150512	593.911	0.000992962	0.72955
125997	MBD3L2	8025129	2133.68	0.0415188	1556.64	0.0199905	0.729556
9633	MTL5	7949956	1149.37	0.0128247	838.637	0.00477889	0.729651
6794	STK11	8024204	575.609	0.0130471	420.365	0.0028673	0.730297
31	ACACA	8014487	662.942	0.0132027	484.231	0.00427384	0.730427
28955	DEXI	7982185	436.076	0.0496641	318.562	0.0140997	0.73052
28955	DEXI	7986685	436.076	0.0496641	318.562	0.0140997	0.73052
83746	L3MBTL2	8073379	627.169	0.0117359	458.212	0.00735137	0.730603
55251	PCMTD2	8177460	556.794	0.0241757	406.825	0.0351881	0.730656
55251	PCMTD2	8176865	556.794	0.0241757	406.825	0.0351881	0.730656
3012	HIST1H2AE	8117408	637.057	0.0115899	465.479	0.000267456	0.73067
84717	HDGFRP2	8024864	733.897	0.0299134	536.705	0.0215533	0.731308
57505	AARS2	8126681	653.895	0.00804071	478.206	0.024724	0.73132
54915	YTHDF1	8067593	325.69	0.000750923	238.209	0.000407804	0.731399
284697	BTBD8	7902965	1432.53	0.0254284	1047.79	0.00880682	0.731427
219855	SLC37A2	7944931	1465.95	0.026473	1072.25	0.0109218	0.731436
114659	LRRC37B	8006336	513.996	0.0151272	376.006	0.0136909	0.731535
23469	PHF3	8120441	471.148	0.00363136	344.667	0.0124373	0.731548
9665	KIAA0430	7999642	521.293	0.0317895	381.48	0.00297043	0.731795
84986	ARHGAP19	7935403	671.445	0.00916452	491.41	0.0308382	0.73187
155061	ZNF746	8143725	334.919	0.000858112	245.149	0.00324055	0.731966
149950	RP11-410N8.4	8061742	1549.79	0.00600642	1134.85	0.00203479	0.732258
604	BCL6	8092691	387.177	0.00888401	283.584	0.000439624	0.73244
23338	PHF15	8108080	411.673	0.000763826	301.526	0.00245294	0.732442
56891	LGALS14	8028750	2041.2	0.0396363	1495.15	0.0240848	0.732484
692234	SNORD103A	7914324	546.394	0.00065888	400.253	3.51792e-06	0.732536
692234	SNORD103A	7914322	546.394	0.00065888	400.253	3.51792e-06	0.732536
79990	PLEKHH3	8015665	829.204	0.0466973	607.977	0.00832265	0.733206
92610	TIFA	8102362	532.57	0.00108462	390.509	0.000322393	0.733253
1588	CYP19A1	7988767	1767.49	0.0417678	1296.14	0.00587518	0.733325
85301	COL27A1	8157383	589.05	0.00164814	431.981	0.00767556	0.733352
84904	C9orf100	8161026	678.746	0.00182993	497.885	0.00339575	0.733537
10100	TSPAN2	7918857	915.986	0.0428016	672.021	0.0195448	0.733658
3493	IGHA1	7981722	390.714	0.0120939	286.721	0.00462894	0.73384
57678	GPAM	7936322	909.846	0.00943234	667.753	0.0186717	0.733918
503542	SPRN	7937228	915.927	0.0306993	672.374	0.0125471	0.734091
54861	SNRK	8079140	395.981	0.00125926	290.83	0.000241942	0.734456
79607	FAM118B	7945058	611.634	0.0433852	449.276	0.0175137	0.73455
8139	GAN	7997414	600.09	0.00474625	441.534	0.00404324	0.73578
119016	AGAP4	7933405	641.381	0.00902795	472.016	0.00383341	0.735937
790	CAD	8040843	603.659	0.0118511	444.364	0.0172536	0.736117
55521	TRIM36	8113577	1768.78	0.0234361	1302.35	0.0423461	0.736296
84162	KIAA1109	8097148	873.041	0.0482339	642.916	0.00794344	0.73641
211	ALAS1	8080184	236.258	8.17221e-05	174.01	3.43853e-05	0.736524
56957	OTUD7B	7919699	320.075	2.21861e-05	235.781	0.00055174	0.736645
55250	ELP2	8020930	539.047	0.0203528	397.16	0.0188382	0.736781
7286	TUFT1	7905428	482.622	0.0010353	355.644	0.00013521	0.736899
54811	ZNF562	8033801	629.943	0.0039646	464.242	0.00290518	0.736959
338755	OR2AG2	7946278	1095.87	0.0123513	807.811	0.000529064	0.737142
7750	ZMYM2	7967900	775.991	0.0428933	572.051	0.0209683	0.737188
64785	GINS3	7996211	449.942	0.00148856	332.015	0.00391498	0.737905
4776	NFATC4	7973709	416.473	0.00697055	307.379	0.00618499	0.738051
10257	ABCC4	7972297	717.41	0.02266	529.497	0.0115823	0.738068
25904	CNOT10	8078412	571.806	0.00213483	422.113	0.0215384	0.73821
55689	YEATS2	8084232	485.939	0.00824938	359.037	0.00116634	0.738851
23395	LARS2	8079311	704.423	0.00623094	520.537	0.00582468	0.738955
2146	EZH2	8143663	675.406	0.0377566	499.201	0.0257561	0.739112
57827	C6orf47	8178552	576.635	0.00279308	426.347	3.37812e-05	0.739371
57827	C6orf47	8179808	576.635	0.00279308	426.347	3.37812e-05	0.739371
7473	WNT3	8016311	941.796	0.0158873	696.541	0.00488097	0.739587
9966	TNFSF15	8163618	1750.87	0.0450697	1295.26	0.00983335	0.739779
51362	CDC40	8121461	508.836	0.00731849	376.584	0.00744507	0.740089
25988	HINFP	7944435	479.006	0.00101101	354.626	0.000133408	0.740338
80821	DDHD1	7979223	700.415	0.0129677	518.608	0.0317428	0.74043
84067	FAM160A2	7946128	594.214	0.00564661	440.031	0.0020254	0.740527
22884	WDR37	7925851	512.167	0.00176273	379.297	0.000322919	0.740571
1026	CDKN1A	8119088	554.659	0.0226817	410.789	0.00552096	0.740616
2318	FLNC	8135990	439.562	0.00834487	325.592	0.00857983	0.74072
6535	SLC6A8	7995292	704.06	0.0304164	521.533	0.0298834	0.740751
442247	RFPL4B	8121553	1579.25	0.0214388	1170.64	0.0211021	0.741263
717	C2	8118324	1470.97	0.0318593	1090.66	0.0157786	0.741456
8661	EIF3A	7936614	787.799	0.0276592	584.262	0.0127419	0.741638
6811	STX5	7948864	414.681	0.00198248	307.572	0.000667379	0.741707
51562	MBIP	7978666	670.984	0.0217347	497.739	0.0098406	0.741805
100287290	LOC100287290	8083652	930.519	0.00574793	690.695	0.000541915	0.742269
4488	MSX2	8110084	349.636	0.000469311	259.527	0.00173273	0.742277
5546	PRCC	7906235	263.345	0.000162106	195.507	0.00195433	0.7424
6698	SPRR1A	7905544	1298.49	0.0428457	964.21	0.00428521	0.742564
64978	MRPL38	8018511	674.336	0.0207587	500.738	0.0493455	0.742565
8760	CDS2	8060772	711.519	0.040171	528.427	0.00119467	0.742675
25778	DSTYK	7923731	823.053	0.0376355	611.412	0.00307356	0.742859
23523	CABIN1	8071823	584.377	0.0051444	434.146	0.0061699	0.742921
10116	FEM1B	7984470	244.539	3.49242e-05	181.768	5.65378e-05	0.743308
157922	CAMSAP1	8165046	501.374	0.0063667	372.684	0.000330588	0.743325
643210	FLJ40292	8159732	515.272	0.00101402	383.144	0.000180802	0.743577
54815	GATAD2A	8027169	455.069	0.0274858	338.418	0.0298741	0.743663
8328	GFI1B	8158939	1425.58	0.034893	1060.18	0.0238357	0.743681
11176	BAZ2A	7964203	531.23	0.0188734	395.12	0.0132462	0.743784
55152	DALRD3	8087236	696.18	0.0371026	518.142	0.00208377	0.744264
79818	ZNF552	8039687	679.064	2.72763e-05	506.319	9.92414e-05	0.745613
2531	KDSR	8023656	681.618	0.0469887	508.342	0.0148178	0.745788
2033	EP300	8073345	236.498	2.33997e-05	176.467	0.00106019	0.746165
206412	C6orf163	8121009	1407.92	0.00209643	1050.63	0.000417571	0.746229
54986	ULK4	8086352	1718.2	0.0233484	1282.34	0.00378111	0.74633
158511	CSAG1	8170576	1101.65	0.0279	822.317	0.0071086	0.746442
23054	NCOA6	8065776	334.711	0.00252911	249.852	0.00100739	0.746472
165530	CLEC4F	8052908	839.649	0.0106854	626.924	0.000366188	0.74665
389616	OR7E125P	8144422	824.318	0.00903195	615.512	0.000575187	0.746692
9720	CCDC144A	8013272	1005.39	0.0394445	751.221	0.029414	0.747193
23294	ANKS1A	8118863	410.802	0.0008235	306.948	0.00367296	0.747193
23219	FBXO28	7909992	419.693	0.0170571	313.754	0.0110403	0.74758
6489	ST8SIA1	7961757	830.068	0.0353721	620.615	0.000558484	0.747668
728936	NBPF16	7904574	596.355	0.00304192	445.969	0.00171554	0.747824
55251	PCMTD2	8097064	598.901	0.0184949	447.964	0.0376853	0.747976
360226	PRSS41	7992716	999.57	0.00945991	747.714	0.00534953	0.748036
6872	TAF1	8168303	896.542	0.0180775	670.939	0.00992371	0.748363
284129	SLC26A11	8010405	551.895	0.0109947	413.164	0.0101183	0.748628
7994	MYST3	8150491	281.738	6.89796e-05	211.031	7.37571e-06	0.749034
91039	DPP9	8032871	458.607	0.0315856	343.688	0.0169743	0.749418
7291	TWIST1	8138442	521.513	0.0496085	390.892	0.00290783	0.749536
80119	PIF1	7989680	908.927	0.0274971	681.306	0.00613446	0.749572
9353	SLIT2	8094301	564.833	0.0166674	423.616	0.00802014	0.749984
51559	NT5DC3	7965918	704.114	0.0115223	528.173	0.00813515	0.750124
161742	SPRED1	7982564	412.793	0.00190573	309.789	0.00149303	0.75047
94039	ZNF101	8027233	663.804	0.000346679	498.176	0.0084451	0.750487
4798	NFRKB	7952677	660.969	0.0092453	496.104	0.0039793	0.75057
196294	IMMP1L	7947332	723.102	0.0239696	542.742	0.0497623	0.750574
645212	LOC645212	7988283	431.178	0.00604642	323.666	0.000782075	0.750654
126208	ZNF787	8039569	411.878	0.00209257	309.183	0.00308109	0.750668
79658	ARHGAP10	8097717	506.238	0.00397396	380.025	0.00222932	0.750684
130507	UBR3	8046213	740.605	0.0427419	556.002	0.0153225	0.75074
734	OSGIN2	8147221	618.708	0.0136507	464.706	0.00615787	0.751091
57396	CLK4	8116245	394.903	7.23107e-05	296.635	1.78618e-05	0.75116
94107	TMEM203	8165486	514.035	0.0113417	386.291	0.00133212	0.751489
146057	TTBK2	7987960	598.577	0.0230973	449.872	0.00322825	0.751569
54498	SMOX	8060745	700.247	0.0229635	526.292	0.0156617	0.75158
10501	SEMA6B	8032839	645.015	0.000502486	484.87	0.00418611	0.751719
26804	SNORD45B	7902400	219.41	0.000504491	165.034	4.4893e-05	0.752172
406956	MIR181B2	8157802	1013.97	5.19959e-05	763.059	0.00101966	0.752549
23281	MTUS2	7968307	1150.22	0.00794284	865.653	0.00227726	0.7526
79939	SLC35E1	8035177	514.404	0.0373221	387.269	0.00842907	0.75285
23373	CRTC1	8027053	384.838	0.0184901	289.861	0.00715797	0.753203
254394	MCM9	8129218	683.328	0.00938522	514.892	0.00306978	0.753507
79000	C1orf135	7913852	514.962	0.000638118	388.035	0.00200077	0.753523
49855	SCAPER	7990582	651.506	0.0104829	490.975	0.00947488	0.7536
5371	PML	7984779	473.734	0.00673982	357.12	0.00325367	0.75384
1025	CDK9	8158112	404.929	0.000992867	305.449	0.00194746	0.754328
28396	IGHV4-31	7981601	1800.12	0.0398946	1358.63	0.00865188	0.754741
202134	FAM153B	8110123	1235.84	0.0111575	932.989	0.00496723	0.754944
22870	SAPS1	8039413	637.713	0.0476249	481.479	0.0134833	0.75501
9479	MAPK8IP1	8007848	870.65	0.0382354	657.626	0.0141087	0.755327
23271	CAMSAP1L1	7908614	542.191	0.0100308	409.569	0.00404901	0.755397
729092	AGAP5	7934451	728.993	0.0109563	550.816	0.00273326	0.755586
55777	MBD5	8045604	458.033	0.00277421	346.302	0.00122655	0.756064
24147	FJX1	7939365	351.854	0.00818605	266.084	0.00132109	0.756235
55201	MAP1S	8026821	371.014	0.00545367	280.724	0.00695397	0.75664
9929	JOSD1	8076128	587.429	0.00270635	444.68	0.0169523	0.756993
5609	MAP2K7	8025351	605.933	0.00783509	458.711	0.00462974	0.757031
55656	INTS8	8147396	561.49	0.0141491	425.266	0.0362713	0.757389
80095	ZNF606	8031843	1437.94	0.0322554	1089.28	0.0201951	0.757529
653268	AGAP7	7933574	763.214	0.0249332	578.227	0.00767312	0.757621
285962	FLJ40852	8143448	1174.61	0.00530659	890.027	0.00570549	0.757719
55090	MED9	8005260	303.622	3.87791e-06	230.14	7.06624e-05	0.757981
56945	MRPS22	8083011	537.295	0.0396897	407.302	0.0374168	0.75806
26974	ZNF285	8037459	1198.31	0.0358573	908.534	0.00337643	0.758178
85464	SSH2	8013965	348.756	0.000178225	264.439	0.000215752	0.758237
26097	C1orf77	7905589	621.692	0.0246805	471.419	0.0107806	0.758284
643837	LOC643837	7896759	628.352	0.00295416	476.495	0.0111659	0.758325
11113	CIT	7966878	699.946	0.0209337	530.795	0.0056087	0.758337
3099	HK2	8042942	604.402	0.0230022	458.754	0.0071775	0.759021
84669	USP32	8017212	587.223	0.00950854	445.771	0.00271491	0.759117
60370	AVPI1	7935521	317.309	0.00112889	240.886	8.35185e-05	0.759153
79142	PHF23	8012099	236.392	4.53102e-06	179.542	0.000227555	0.759512
57647	DHX37	7967588	718.431	0.0136639	545.661	0.0308059	0.759518
8027	STAM	7926385	402.842	0.0143323	305.971	0.0008712	0.759532
51542	VPS54	8052626	810.521	0.0371991	615.62	0.0401162	0.759536
54477	PLEKHA5	7954245	435.08	0.00472636	330.547	0.00173626	0.759739
23067	SETD1B	7959314	401.731	0.00282182	305.235	0.000619136	0.759798
1105	CHD1	8113305	300.412	2.09492e-06	228.284	0.00171073	0.759903
90427	BMF	7987454	939.083	0.00536378	713.818	0.00104786	0.760122
254048	UBN2	8136516	580.765	0.000447078	441.475	0.00277418	0.76016
7268	TTC4	7901662	494.868	0.0211666	376.392	0.00524056	0.760591
91947	ARRDC4	7986350	345.102	0.00165675	262.588	0.00069075	0.760899
60436	TGIF2	8062319	361.763	0.000272936	275.365	0.000171488	0.761174
9284	NPIP	7999769	465.902	0.00616746	354.656	0.0066343	0.761225
9110	MTMR4	8017019	519.451	0.00610892	395.592	0.00491838	0.761557
2736	GLI2	8044933	566.204	0.00242618	431.289	0.0012736	0.76172
80007	C10orf88	7936817	548.523	0.00393264	418.354	0.016805	0.762692
6044	SNORA62	8078918	203.836	0.00164335	155.522	0.000322623	0.762976
4157	MC1R	7998055	607.834	0.00210541	463.981	0.000431078	0.763335
400798	C1orf220	7907649	956.942	0.0017206	730.496	0.000188688	0.763365
8289	ARID1A	7899220	224.045	0.000298459	171.045	0.000994442	0.763438
8853	ASAP2	8040113	736.845	0.0336985	562.61	0.00802105	0.763539
25926	NOL11	8009366	435.269	0.0147384	332.606	0.00617888	0.764139
55048	VPS37C	7948504	476.908	0.0147284	364.484	0.00360411	0.764264
29079	MED4	7971550	648.809	0.03539	496.023	0.0250325	0.764513
619569	SNORA41	8047780	1155.24	0.00755867	883.201	0.016944	0.764517
55596	ZCCHC8	7967287	370.182	4.32945e-05	283.012	0.00022393	0.764521
23049	SMG1	7999841	522.962	0.0014991	399.947	0.00720317	0.764772
55917	CTTNBP2NL	7904018	557.902	0.0218437	426.695	0.00561793	0.764821
8658	TNKS	8144528	515.305	0.0119391	394.14	0.000554308	0.764867
53833	IL20RB	8082916	1144.85	0.0296551	875.819	0.00466029	0.765006
3845	KRAS	7961865	643.685	0.00584787	492.716	0.0271966	0.765461
285172	FAM126B	8058182	346.047	2.66472e-05	264.89	0.000246935	0.765474
84285	EIF1AD	7949545	352.631	2.91574e-05	269.973	2.4683e-06	0.765595
9205	ZMYM5	7970428	771.803	0.0316303	591.113	0.00302127	0.765885
79693	YRDC	7915084	422.414	0.00909378	323.551	0.000243853	0.765956
8925	HERC1	7989516	868.911	0.0215779	665.839	0.00557104	0.766291
92822	ZNF276	7998002	618.261	0.0218545	473.827	0.0271924	0.766386
8621	CDK13	8132417	344	0.00149467	263.677	0.000149459	0.766505
6464	SHC1	7920600	708.847	0.0357454	543.537	0.0271735	0.76679
9828	ARHGEF17	7942417	556.474	0.00524844	426.715	0.00194784	0.766819
6047	RNF4	8093590	423.047	0.000960202	324.447	0.0013334	0.766929
3096	HIVEP1	8116910	264.186	4.49571e-05	202.681	0.000248364	0.76719
7592	ZNF41	8172307	670.657	0.0020975	514.618	2.01379e-05	0.767333
23102	TBC1D2B	7985224	602.652	0.0160534	462.486	0.00416566	0.767417
1612	DAPK1	8156199	573.494	0.000738501	440.281	0.00203466	0.767716
100287171	WASH1	7998119	636.889	0.0483394	489.133	0.0230523	0.768004
54790	TET2	8096669	690.472	0.0139985	530.398	0.000135196	0.768168
2932	GSK3B	8089801	441.619	0.0372104	339.269	0.0108315	0.768238
4919	ROR1	7901969	536.96	0.0247977	412.56	0.0028652	0.768325
147172	LRRC37B2	8006170	623.83	0.0227431	479.37	0.0130533	0.768431
150709	ANKAR	8047006	1368.09	0.034539	1051.33	0.0174082	0.768471
2776	GNAQ	8161906	550.131	0.0429376	422.796	0.00993224	0.768538
257044	C1orf101	7911056	892.883	0.000511396	686.302	4.07763e-05	0.768636
90070	LACRT	7963837	1121.96	0.0076447	862.542	0.00381721	0.768784
677836	SNORA58	8090688	1338.48	0.00124848	1029.44	0.00274136	0.769112
644000	ARAF2P	8139804	1543.29	0.0421569	1186.99	0.0238706	0.769127
644000	ARAF2P	8133021	1543.29	0.0421569	1186.99	0.0238706	0.769127
79804	NBLA00301	8098344	2081.85	0.0161826	1601.38	0.0150947	0.76921
133923	ZNF474	8107591	1162.68	0.000476	894.542	0.000154719	0.769379
148137	C19orf55	8028016	577.65	0.00700462	444.54	0.0185719	0.769566
1387	CREBBP	7999044	221.003	0.000665741	170.226	0.00137417	0.770242
171023	ASXL1	8061725	267.838	1.31361e-05	206.358	6.17793e-06	0.770457
899	CCNF	7992594	231.465	3.88164e-07	178.373	6.36052e-05	0.770628
11135	CDC42EP1	8072817	410.189	0.00692801	316.187	0.00932988	0.770832
5078	PAX4	8142747	1370.15	0.0403603	1056.17	0.0172557	0.770842
7675	ZNF121	8033789	361.491	8.5139e-05	278.731	0.0212468	0.771061
7840	ALMS1	8042737	709.331	0.0263612	546.948	0.0242112	0.771076
64132	XYLT2	8008297	611.089	0.00600886	471.25	0.0052808	0.771165
9826	ARHGEF11	7921179	558.146	0.019997	430.608	0.00279351	0.771496
89876	C3orf15	8081903	2284.17	0.0194253	1763	0.00137873	0.771832
10957	PNRC1	8121076	250.869	0.000161281	193.65	2.86438e-05	0.771916
5205	ATP8B1	8021365	719.36	0.0399713	555.366	0.00499426	0.772029
51514	DTL	7909568	517.365	0.011891	399.46	0.00558739	0.772106
196264	MPZL3	7952036	1022.01	0.0176344	789.171	0.0358807	0.772173
525	ATP6V1B1	8042537	1113.77	0.0304911	860.331	0.0105912	0.77245
57727	NCOA5	8066668	346.659	0.00132361	267.782	0.0012477	0.772465
5966	REL	8042144	409.589	0.000700726	316.448	0.00454102	0.772599
23510	KCTD2	8009737	350.46	0.00225596	270.894	0.000725284	0.772968
641339	ZNF674	8172274	839.648	0.0178524	649.06	0.000648432	0.773015
59084	ENPP5	8126750	2359.22	0.0193823	1824	0.0167511	0.773138
5380	PMS2L2	8133300	529.248	0.0255676	409.253	0.00373016	0.773273
2887	GRB10	8139656	534.654	0.00824814	413.994	0.0114122	0.774321
399669	ZNF321	8039013	1074.77	0.00239267	832.245	0.00165116	0.774348
57696	DDX55	7959604	600.001	0.00958834	464.625	0.00703383	0.774374
80063	ATF7IP2	7993167	1441.57	0.0202281	1116.4	0.0351379	0.77443
440822	PIWIL3	8075026	2392.75	0.00379031	1853.29	0.0343657	0.774542
84934	C12orf52	7958950	559.486	0.00885259	433.408	0.00295873	0.774654
80311	KLHL15	8171837	474.719	0.000229727	367.806	0.00734472	0.774785
23405	DICER1	7981111	709.687	0.0264356	550.039	0.0166723	0.775044
167838	TXLNB	8129924	2126.26	0.00524872	1648.5	0.0289707	0.775307
54938	SARS2	8036656	699.543	0.0295917	542.448	0.0475462	0.775432
55344	PLCXD1	8176286	546.492	0.00293029	424.132	0.0185778	0.776098
9743	ARHGAP32	7952641	387.131	0.00165484	300.532	0.000363065	0.776306
10248	POP7	8134904	377.58	0.0029806	293.138	9.88177e-05	0.776362
5900	RALGDS	8164810	561.956	0.00311017	436.368	0.00751479	0.776516
9156	EXO1	7910997	434.704	0.000148548	337.668	0.00552352	0.776777
148479	PHF13	7897322	221.895	1.9049e-06	172.429	1.60944e-05	0.777075
196074	METT5D1	8091656	689.399	0.0347042	536.216	0.0341212	0.777801
11083	DIDO1	8067563	320.455	0.000187802	249.274	0.000929163	0.777875
51283	BFAR	7993341	554.89	0.0215114	431.66	0.00860063	0.77792
84759	PCGF1	8053187	346.996	0.0128453	269.946	0.00790323	0.777951
10401	PIAS3	7904812	617.548	0.0353953	480.49	0.0218776	0.778061
729092	AGAP5	7927305	510.207	0.00228667	397.328	0.00221846	0.778758
389517	SPDYE8P	8140445	692.462	0.0207195	539.275	0.00447652	0.778779
5342	PLGLB2	8053602	880.495	0.00144997	685.843	7.50838e-05	0.778929
5342	PLGLB2	8043367	880.495	0.00144997	685.843	7.50838e-05	0.778929
7091	TLE4	8156060	239.602	0.000749841	186.659	0.000404556	0.779039
64376	IKZF5	7936826	575.181	0.00696879	448.242	0.0266356	0.779306
65249	ZSWIM4	8026198	747.851	0.0028647	582.85	0.00339125	0.779366
221527	ZBTB12	8125201	805.248	0.0252479	627.68	0.0169354	0.779486
221527	ZBTB12	8178683	805.248	0.0252479	627.68	0.0169354	0.779486
23742	C15orf2	7981917	1194.42	0.0165401	931.425	0.00863159	0.779815
1745	DLX1	8046373	403.241	9.37846e-05	314.782	2.89155e-05	0.78063
10128	LRPPRC	8051882	688.774	0.0142518	537.715	0.0297421	0.780684
7290	HIRA	8074432	509.74	0.00318865	398.148	0.0109397	0.781081
548321	FAM27A	8155572	844.957	0.00524001	660.011	0.0194245	0.781118
6877	TAF5	7930213	358.4	0.000132115	279.957	0.00016092	0.78113
84787	SUV420H2	8031466	577.7	0.000713056	451.388	0.00265778	0.781354
8013	NR4A3	8156848	718.937	0.00896099	562.275	0.0102889	0.782092
8527	DGKD	8049317	539.012	0.000851692	421.727	0.00198707	0.782407
116841	SNAP47	7910200	735.689	0.0366483	575.643	0.0022082	0.782454
57147	SCYL3	7907183	779.603	0.00094793	610.407	0.0043802	0.782971
163154	PRR22	8033023	726.653	0.0211081	569.206	0.00772181	0.783326
91833	WDR20	7976957	445.232	1.64436e-05	348.892	0.000531815	0.783617
1758	DMP1	8096274	1800.54	0.0220752	1411.02	0.0155032	0.783665
2979	GUCA1B	8126387	1561.32	0.0293608	1223.86	0.0495369	0.783864
4035	LRP1	7956301	581.064	0.0484732	455.693	0.0103774	0.784239
256364	EML3	7948718	795.575	0.0308145	624.059	0.0145567	0.784413
10157	AASS	8142554	753.941	0.041318	591.742	0.0266353	0.784865
8604	SLC25A12	8056766	519.569	0.00665817	407.799	0.00290447	0.78488
203259	C9orf25	8160805	536.245	0.0139396	421.042	0.00615731	0.785168
8292	COLQ	8085581	1141.63	0.00998245	896.613	0.00116187	0.785382
58490	RPRD1B	8062433	503.386	0.00687911	395.351	0.00414969	0.785383
114825	PWWP2A	8115580	432.04	0.00385632	339.338	0.00249425	0.785432
51526	C20orf111	8066402	418.694	0.0020731	328.929	0.000532487	0.785607
3340	NDST1	8109283	525.547	0.0330443	413.12	0.00739906	0.786076
79776	ZFHX4	8147000	461.672	0.00815664	362.952	0.00524218	0.786168
79879	CCDC134	8073513	663.009	0.032339	521.278	0.0136613	0.78623
1060	CENPC1	8100603	373.506	0.000681644	293.736	0.00160206	0.786428
1949	EFNB3	8004571	1197.07	0.0452505	941.574	0.0225389	0.786563
389517	SPDYE8P	8140211	663.425	0.0184691	521.936	0.00411169	0.786729
9520	NPEPPS	8007976	803.566	0.0276731	632.427	0.0263376	0.787026
79009	DDX50	7927926	491.823	0.00813208	387.093	0.0079906	0.787057
347733	TUBB2B	8123651	627.095	0.0246495	493.56	0.0222717	0.787058
26098	C10orf137	7931239	350.248	0.000256242	275.731	0.000708365	0.787244
23361	ZNF629	8000941	736.844	0.0140778	580.403	0.00372739	0.787688
9394	HS6ST1	7898677	457.546	0.0122263	360.405	0.00739486	0.78769
83541	FAM110A	8060370	450.145	0.000738994	354.599	0.00280319	0.787744
79797	ZNF408	7939699	429.62	2.31232e-07	338.481	0.000494535	0.787861
5252	PHF1	8118682	571.382	0.013418	450.299	0.0267941	0.788087
4097	MAFG	8019798	540.355	0.000281674	425.868	0.000651867	0.788126
10090	UST	8122660	736.126	0.0336049	580.211	0.0127722	0.788195
5818	PVRL1	7952274	999.512	0.0149547	788.069	0.0293641	0.788453
9325	TRIP4	7984190	560.263	0.0106335	441.782	0.00876826	0.788527
404734	ANKHD1-EIF4EBP3	8108510	353.644	0.000311145	278.911	7.06788e-05	0.788676
9297	SNORD29	7948902	169.835	3.34386e-05	134.005	8.34796e-05	0.789034
999	CDH1	7996837	1199.77	0.0390604	946.723	0.000744343	0.78909
114907	FBXO32	8152703	254.063	3.03015e-05	200.502	0.00193149	0.78918
26271	FBXO5	8130374	186.091	4.41895e-06	146.861	9.80187e-05	0.789191
389834	LOC389834	8104139	832.128	0.0018396	657.095	0.00780026	0.789657
1059	CENPB	8064762	533.728	0.017126	421.547	0.010095	0.789815
8243	SMC1A	8172876	766.902	0.0406672	605.742	0.0258042	0.789856
29092	HSPC157	7898736	554.398	0.00804651	438.091	0.000739124	0.79021
[truncated: 3,483 more rows]
