# Supplementary material for: Global analysis reveals multiple pathways for unique regulation of mRNA decay in induced pluripotent stem cells
Source: HighWire-hosted journal article supplement (doi:10.1101/gr.134312.111), 2012-04-25
Supplement: SuppLegends.docx [file SuppLegends.docx]

**Supplementary Material**

**Dataset 1**: (A) Half-lives of 8,238mRNAs in HFF cells. (B) Half-lives of 10,445 mRNAs in iPS cells. (C) Half-lives of 5,481 mRNAs in both HFF and iPS cells. GEO Accession Number GSE33417 (<http://www.ncbi.nlm.nih.gov/geo/query/acc.cgi?token=xfwvhiaisacmyrq&acc=GSE33417>)

**Supplementary Figure S1:** Common sets of mRNAs with short and long half-lives in HFFs and iPS cells.

**Supplementary Figure S2**: In asynchronous populations, more iPS cells are in S phase than HFF cells.

**Supplementary Table 1**: (A) Table showing occurrence of 4,096 hexamers in 5’UTR, 3’UTR and ORF of stable and unstable mRNAs in iPS cells. (B) Table showing occurrence of 4,096 hexamers in 5’UTR, 3’UTR and ORF of stable and unstable mRNAs in HFF cells.

**Supplementary Table 2:** List of elements enriched in the 3’UTRs of transcripts that were destabilized in iPS cells.

**Supplementary Table 3**: List of mRNAs that are less stable in iPS cells and have 3’UTR C-rich elements.

**Supplementary Table 4**: mRNAs that are destabilized in iPS cells and bear C-rich elements in their 3’UTRs encode proteins that function as transcription factors and/or are required for embryonic development.

**Supplementary Table 5**: Oligonucleotides used for qRT-PCR analysis.
