# Supplementary material for: Global analysis reveals multiple pathways for unique regulation of mRNA decay in induced pluripotent stem cells
Source: HighWire-hosted journal article supplement (doi:10.1101/gr.134312.111), 2012-04-25
Supplement: Supplementary_Table_3_C-rich_element_mRNAs.docx [file Supplementary_Table_3_C-rich_element_mRNAs.docx]

**Supplementary Table 3: List of mRNAs that are less stable in iPS cells and have 3’UTR C-rich elements.** The mRNAs that were most destabilized in iPS cells (bottom 10%; **Fig. 1**) were examined. Hexamers corresponding to the C-rich element motif were derived from clustering of significant hexamers associated with destabilized mRNAs. Clustering of hexamers was performed as described previously ([Hu et al. 2005](#_ENREF_2)). Transcripts with more C-rich hexamers than the median number of C-rich hexamers in all unstable transcripts are shown.HL= half-life

| **Transcript ID** | **Gene ID** | **Gene Symbol** | **iPS.HL (min)** | **HFF.HL (min)** | **# of C-rich hexamers** |
| --- | --- | --- | --- | --- | --- |
| 8026155 | 112939 | NACC1 | 194 | 721 | 120 |
| 8032755 | 51341 | ZBTB7A | 253 | 418 | 118 |
| 7897068 | 6497 | SKI | 245 | 374 | 93 |
| 7962951 | 8085 | MLL2 | 216 | 497 | 84 |
| 7920341 | 57459 | GATAD2B | 199 | 337 | 70 |
| 8029856 | 2909 | GRLF1 | 205 | 369 | 56 |
| 8169882 | 63035 | BCORL1 | 216 | 444 | 49 |
| 8148923 | 9684 | LRRC14 | 252 | 417 | 49 |
| 8158839 | 84726 | BAT2L1 | 192 | 535 | 46 |
| 8175947 | 3054 | HCFC1 | 197 | 501 | 45 |
| 8009995 | 85451 | UNK | 188 | 359 | 42 |
| 7914021 | 6548 | SLC9A1 | 257 | 465 | 41 |
| 8013776 | 55731 | C17orf63 | 154 | 333 | 40 |
| 7941769 | 22992 | KDM2A | 248 | 433 | 38 |
| 7947462 | 25841 | ABTB2 | 258 | 465 | 38 |
| 8019796 | 4097 | MAFG | 152 | 259 | 37 |
| 7999173 | 124402 | FAM100A | 193 | 400 | 37 |
| 7930537 | 6934 | TCF7L2 | 241 | 438 | 37 |
| 8067563 | 11083 | DIDO1 | 249 | 320 | 36 |
| 7989657 | 53944 | CSNK1G1 | 259 | 902 | 34 |
| 8071044 | 100132288 | LOC100132288 | 231 | 509 | 32 |
| 8003298 | 8140 | SLC7A5 | 245 | 538 | 32 |
| 7999044 | 1387 | CREBBP | 170 | 221 | 31 |
| 7941565 | 64837 | KLC2 | 216 | 650 | 29 |
| 7985605 | 9640 | ZNF592 | 159 | 290 | 28 |
| 7906128 | 9673 | SLC25A44 | 177 | 644 | 28 |
| 8162533 | 5727 | PTCH1 | 253 | 505 | 28 |
| 8076331 | 10766 | TOB2 | 113 | 233 | 27 |
| 7959361 | 22877 | MLXIP | 178 | 323 | 27 |
| 8037079 | 478 | ATP1A3 | 189 | 726 | 27 |
| 7948574 | 79869 | CPSF7 | 249 | 362 | 27 |
| 7990632 | 79834 | SGK269 | 252 | 546 | 27 |
| 8052689 | 200734 | SPRED2 | 146 | 341 | 26 |
| 7994985 | 9739 | SETD1A | 194 | 350 | 26 |
| 8087473 | 9807 | IP6K1 | 214 | 369 | 26 |
| 7949383 | 84447 | SYVN1 | 227 | 445 | 26 |
| 7994655 | 79447 | C16orf53 | 234 | 459 | 26 |
| 7972713 | 1948 | EFNB2 | 241 | 513 | 26 |
| 7945944 | 391 | RHOG | 135 | 427 | 25 |
| 7967331 | 79720 | VPS37B | 159 | 303 | 25 |
| 7920594 | 90780 | PYGO2 | 192 | 316 | 25 |
| 8071314 | 54487 | DGCR8 | 231 | 410 | 24 |
| 8087833 | 1849 | DUSP7 | 96 | 371 | 23 |
| 7990033 | 7090 | TLE3 | 199 | 559 | 23 |
| 7981525 | 55038 | CDCA4 | 200 | 308 | 22 |
| 7913558 | 7798 | LUZP1 | 207 | 356 | 22 |
| 8131996 | 9586 | CREB5 | 253 | 1733 | 22 |
| 8010188 | 57690 | TNRC6C | 258 | 502 | 22 |
| 8016266 | 284058 | KIAA1267 | 165 | 318 | 21 |
| 7936242 | 85450 | ITPRIP | 205 | 361 | 21 |
| 8000167 | 23049 | SMG1 | 212 | 531 | 21 |
| 8000222 | 23049 | SMG1 | 241 | 385 | 21 |
| 7993999 | 23049 | SMG1 | 241 | 385 | 21 |
| 8000834 | 23049 | SMG1 | 256 | 448 | 21 |
| 8102862 | 55534 | MAML3 | 257 | 606 | 21 |
| 8004867 | 81565 | NDEL1 | 258 | 435 | 21 |
| 8133326 | 9883 | POM121 | 53 | 394 | 20 |
| 8133331 | 9883 | POM121 | 149 | 285 | 20 |
| 7951873 | 23387 | SIK3 | 188 | 347 | 20 |
| 8068361 | 6526 | SLC5A3 | 215 | 719 | 20 |
| 7920000 | 23126 | POGZ | 157 | 335 | 19 |
| 8005267 | 10743 | RAI1 | 204 | 397 | 19 |
| 7984952 | 56905 | C15orf39 | 110 | 280 | 18 |
| 7899220 | 8289 | ARID1A | 171 | 224 | 18 |
| 8140297 | 100101267 | POM121C | 172 | 302 | 18 |
| 7998898 | 9074 | CLDN6 | 194 | 1455 | 18 |
| 8137542 | 155435 | RBM33 | 205 | 346 | 18 |
| 8123044 | 56995 | TULP4 | 251 | 521 | 18 |
| 8029193 | 23152 | CIC | 156 | 562 | 17 |
| 8137215 | 65999 | LRRC61 | 203 | 847 | 17 |
| 7937438 | 283232 | TMEM80 | 208 | 480 | 17 |
| 8139212 | 2737 | GLI3 | 216 | 345 | 17 |
| 7933204 | 11067 | C10orf10 | 64 | 517 | 16 |
| 8078091 | 7182 | NR2C2 | 204 | 484 | 16 |
| 8077528 | 55209 | SETD5 | 226 | 334 | 16 |
| 8005785 | 8844 | KSR1 | 248 | 578 | 16 |
| 8013812 | 57649 | PHF12 | 79 | 234 | 15 |
| 7994889 | 10847 | SRCAP | 122 | 319 | 15 |
| 7960666 | 171017 | ZNF384 | 260 | 618 | 15 |
| 8123864 | 7020 | TFAP2A | 134 | 226 | 14 |
| 8068551 | 1859 | DYRK1A | 165 | 271 | 14 |
| 8145829 | 80139 | ZNF703 | 174 | 266 | 14 |
| 8007673 | 80174 | DBF4B | 207 | 489 | 14 |
| 7987584 | 54617 | INO80 | 161 | 361 | 13 |
| 8166797 | 58526 | MID1IP1 | 187 | 364 | 13 |
| 7955589 | 3164 | NR4A1 | 189 | 945 | 13 |
| 7905185 | 23248 | RPRD2 | 202 | 392 | 13 |
| 7941707 | 10432 | RBM14 | 211 | 805 | 13 |
| 8126629 | 54676 | GTPBP2 | 227 | 458 | 13 |
| 7902810 | 8543 | LMO4 | 236 | 416 | 13 |
| 7941702 | 10432 | RBM14 | 248 | 732 | 13 |
| 7942626 | 7405 | UVRAG | 260 | 397 | 13 |
| 8110084 | 4488 | MSX2 | 260 | 350 | 13 |
| 8080878 | 6314 | ATXN7 | 179 | 321 | 12 |
| 8154872 | 51271 | UBAP1 | 226 | 465 | 12 |
| 8005260 | 55090 | MED9 | 230 | 304 | 12 |
| 7924868 | 81559 | TRIM11 | 238 | 367 | 12 |
| 8037144 | 162989 | DEDD2 | 242 | 307 | 12 |
| 8143725 | 155061 | ZNF746 | 245 | 335 | 12 |
| 8073960 | 415116 | PIM3 | 137 | 311 | 11 |
| 8046524 | 3239 | HOXD13 | 172 | 614 | 11 |
| 7980338 | 64207 | C14orf4 | 195 | 343 | 11 |
| 7990487 | 25942 | SIN3A | 216 | 337 | 11 |
| 7905909 | 1945 | EFNA4 | 223 | 436 | 11 |
| 8126512 | 51069 | MRPL2 | 238 | 339 | 11 |
| 7949465 | 5970 | RELA | 251 | 359 | 11 |
| 8161192 | 152006 | RNF38 | 257 | 408 | 11 |
| 7992594 | 899 | CCNF | 178 | 231 | 10 |
| 8009014 | 11011 | TLK2 | 181 | 228 | 10 |
| 8025458 | 57693 | ZNF317 | 196 | 341 | 10 |
| 8096675 | 54790 | TET2 | 208 | 361 | 10 |
| 7919584 | 440689 | HIST2H2BF | 244 | 351 | 10 |
| 8025828 | 3949 | LDLR | 121 | 290 | 9 |
| 8087685 | 11070 | TMEM115 | 168 | 451 | 9 |
| 8103025 | 152485 | ZNF827 | 179 | 282 | 9 |
| 8156060 | 7091 | TLE4 | 187 | 240 | 9 |
| 7992789 | 51330 | TNFRSF12A | 201 | 511 | 9 |
| 8061725 | 171023 | ASXL1 | 206 | 268 | 9 |
| 7919699 | 56957 | OTUD7B | 236 | 320 | 9 |
| 8052654 | 57162 | PELI1 | 237 | 358 | 9 |
| 8035156 | 10523 | CHERP | 245 | 432 | 9 |
| 8012423 | 80169 | C17orf68 | 247 | 702 | 9 |
| 8128956 | 2534 | FYN | 259 | 529 | 9 |
| 7949146 | 7536 | SF1 | 127 | 420 | 8 |
| 8007023 | 339287 | MSL1 | 135 | 287 | 8 |
| 8150186 | 79845 | RNF122 | 147 | 454 | 8 |
| 7897322 | 148479 | PHF13 | 172 | 222 | 8 |
| 8093601 | 8603 | FAM193A | 188 | 295 | 8 |
| 7906235 | 5546 | PRCC | 196 | 263 | 8 |
| 7934553 | 84858 | ZNF503 | 207 | 437 | 8 |
| 8102232 | 51176 | LEF1 | 222 | 2061 | 8 |
| 8090237 | 7707 | ZNF148 | 248 | 592 | 8 |
| 8105220 | 3670 | ISL1 | 253 | 372 | 8 |
| 8043114 | 83439 | TCF7L1 | 257 | 387 | 8 |
| 8010820 | 3607 | FOXK2 | 115 | 420 | 7 |
| 8148304 | 10221 | TRIB1 | 116 | 165 | 7 |

| **Transcript ID** | **Gene ID** | **Gene Symbol** | **iPS.HL (min)** | **HFF.HL (min)** | **# of C-rich hexamers** |
| --- | --- | --- | --- | --- | --- |
| 8001387 | 6299 | SALL1 | 121 | 243 | 7 |
| 7996403 | 80262 | C16orf70 | 143 | 242 | 7 |
| 8024356 | 113179 | ADAT3 | 167 | 610 | 7 |
| 8049528 | 9208 | LRRFIP1 | 179 | 555 | 7 |
| 8012099 | 79142 | PHF23 | 180 | 236 | 7 |
| 8012349 | 5187 | PER1 | 183 | 423 | 7 |
| 8070489 | 54101 | RIPK4 | 193 | 942 | 7 |
| 7898278 | 23013 | SPEN | 204 | 473 | 7 |
| 8024898 | 55527 | FEM1A | 214 | 613 | 7 |
| 8165663 | 57678 | GPAM | 220 | 340 | 7 |
| 7949490 | 91056 | DKFZp761E198 | 249 | 390 | 7 |
| 8118174 | 7916 | BAT2 | 255 | 432 | 7 |
| 7948399 | 219988 | PATL1 | 255 | 383 | 7 |
| 7971177 | 2308 | FOXO1 | 256 | 412 | 7 |
| 7913001 | 23352 | UBR4 | 257 | 448 | 7 |
