# Supplementary material for: Global analysis reveals multiple pathways for unique regulation of mRNA decay in induced pluripotent stem cells
Source: HighWire-hosted journal article supplement (doi:10.1101/gr.134312.111), 2012-04-25
Supplement: Supplementary_Table_4_GO_terms_C-rich_mRNAs.docx [file Supplementary_Table_4_GO_terms_C-rich_mRNAs.docx]

| **Term and Description** | **p-value** |
| --- | --- |
| Biological Process | |
| GO:0006350 transcription | 4.68E-04 |
| GO:0006357 regulation of transcription from RNA polymerase II promoter | 4.80E-04 |
| GO:0045449 regulation of transcription | 6.61E-04 |
| GO:0006325 chromatin organization | 2.42E-03 |
| GO:0021915 neural tube development | 2.65E-03 |
| GO:0043009 chordate embryonic development | 2.94E-03 |
| GO:0009792 embryonic development ending in birth or egg hatching | 2.94E-03 |
| GO:0016568 chromatin modification | 3.13E-03 |
| GO:0045893 positive regulation of transcription, DNA-dependent | 3.14E-03 |
| GO:0045944 positive regulation of transcription from RNA polymerase II promoter | 3.29E-03 |
| GO:0051254 positive regulation of RNA metabolic process | 3.30E-03 |
| GO:0010629 negative regulation of gene expression | 4.19E-03 |
| GO:0045941 positive regulation of transcription | 6.67E-03 |
| GO:0035113 embryonic appendage morphogenesis | 6.74E-03 |
| GO:0030326 embryonic limb morphogenesis | 6.74E-03 |
| GO:0016055 Wnt receptor signaling pathway | 8.07E-03 |
| GO:0010628 positive regulation of gene expression | 8.46E-03 |
| GO:0060606 tube closure | 9.79E-03 |
| Molecular Function | |
| GO:0030528 transcription regulator activity | 8.08E-05 |
| GO:0008134 transcription factor binding | 2.72E-04 |
| GO:0016563 transcription activator activity | 3.98E-03 |
| GO:0003712 transcription cofactor activity | 7.78E-03 |
| GO:0003700 transcription factor activity | 8.66E-03 |

**Supplementary Table 4:** mRNAs that are destabilized in iPS cells and bear C-rich elements in their 3’UTRs encode proteins that function as transcription factors and/or are required for embryonic development.
