# Supplementary material for: Global analysis reveals multiple pathways for unique regulation of mRNA decay in induced pluripotent stem cells
Source: HighWire-hosted journal article supplement (doi:10.1101/gr.134312.111), 2012-04-25
Supplement: Supplementary_Table_5_Oligos.docx [file Supplementary_Table_5_Oligos.docx]

**Supplementary Table 5: OIigonucleotides used for qRT-PCR analysis.**

| **Gene ID** | **Primer Name** | **Sequence** |
| --- | --- | --- |
| 2597 | GAPDH Fwd | AAGGTGAAGGTCGGAGTCAA |
| GAPDH Rev | AATGAAGGGGTCATTGATGG |
| 2353 | FOS Fwd | GTGGGAATGAAGTTGGCACT |
| FOS Rev | CTACCACTCACCCGCAGACT |
| 64852 | TUT1 Fwd | AGGCAGCCCAAGAATGGTC |
| TUT1 Rev | GCCACCACTCAGTCCTTTCA |
| 7594 | ZNF43 Fwd | TGGCCAAAAGTCTTGGGTAA |
| ZNF43 Rev | TGATCACCTGTCTGGAGCAA |
| 7693 | ZNF134 Fwd | GAGTCATGCCCTCTCAGGC |
| ZNF134 Rev | CTACGAACTGTGATGGCGG |
| 199692 | ZNF627 Fwd | TTGAGGATGTGGCTGTGAAC |
| ZNF627 Rev | CAGAAGCCAGGTTCCTGAAG |
| 54487 | DGCR8 Fwd | CAAGCAGGAGACATCGGACAAG |
| DGCR8 Rev | CACAATGGACATCTTGGGCTTC |
| 1849 | DUSP7 Fwd | CTGAGGCCATCAGCTTCATT |
| DUSP7 Rev | TAGGCGTCGTTGAGTGACAG |
| 10766 | TOB2 Fwd | CACCCTGGAGGGAGAAGC |
| TOB2 Rev | AGAGAATCAGCACAGGGCAC |
| 7465 | WEE1 Fwd | ATTTCTCTGCGTGGGCAGAAG |
| WEE1 Rev | CAAAAGGAGATCCTTCAACTCTGC |
| 26524 | LATS2 Fwd | AAGAGCTACTCGCCATACGCCTTT |
| LATS2 Rev | AGCTTTGGCCATTTCTTGCTCCAG |
| - | Oligo(dT) adapter | GCGAGCACAGAATTAATACGACTCACTATAGGTTTTTTTTTTTT(A/C/G)N |
| - | Universal Reverse | GCGAGCACAGAATTAATACGACTC |
| - | 5S rRNA | ACCGGGTGCTGTAGGCT |
| 407010 | hsa-miR-23a | ATCACATTGCCAGGGATTTCC |
| 407011 | hsa-miR-23b | ATCACATTGCCAGGGATTACCAC |
| 406995/ 406954 | hsa-miR-181a | AACATTCAACGCTGTCGGTGAGT |
| 612744/ 612745 | hsa-miR-181b | AACATTCATTGCTGTCGGTGGGTT |
| 574457 | hsa-miR-181d | AACATTCATTGTTGTCGGTGGGT |
| 610719/ 610720 | hsa-miR-199a-5p | CCCAGTGTTCAGACTACCTGTTC |
| 406964 | has-miR-188-3p | CACATGCAGGGTTTGCA |
