# Supplementary material for: Global analysis reveals multiple pathways for unique regulation of mRNA decay in induced pluripotent stem cells
Source: HighWire-hosted journal article supplement (doi:10.1101/gr.134312.111), 2012-04-25
Supplement: SuppTab2_3UTR_hexamers.docx [file SuppTab2_3UTR_hexamers.docx]

| Hexamer | # of hexamers in destabilized genes | # of all other hexamers in destabilized genes | # of hexamers in stabilized genes | # of all other hexamers in stabilized genes | p-value | Fold Difference* | Odds  Ratio** |
| --- | --- | --- | --- | --- | --- | --- | --- |
| CCCCTC | 394 | 650851 | 246 | 740198 | 8.49E-14 | 1.60 | 1.82 |
| CTCCCC | 415 | 650830 | 266 | 740178 | 1.54E-13 | 1.56 | 1.77 |
| CCCCCT | 285 | 650960 | 164 | 740280 | 1.61E-12 | 1.74 | 1.98 |
| CCCTGC | 390 | 650855 | 267 | 740177 | 1.17E-10 | 1.46 | 1.66 |
| CACCCC | 338 | 650907 | 223 | 740221 | 1.76E-10 | 1.52 | 1.72 |
| CCCCTG | 340 | 650905 | 226 | 740218 | 2.75E-10 | 1.50 | 1.71 |
| GCCCCC | 236 | 651009 | 141 | 740303 | 8.34E-10 | 1.67 | 1.90 |
| GCCCCT | 280 | 650965 | 179 | 740265 | 1.25E-09 | 1.56 | 1.78 |
| CCCACC | 446 | 650799 | 329 | 740115 | 2.47E-09 | 1.36 | 1.54 |
| CCCTCC | 447 | 650798 | 331 | 740113 | 2.70E-09 | 1.35 | 1.54 |
| CCACCC | 391 | 650854 | 283 | 740161 | 6.10E-09 | 1.38 | 1.57 |
| AGCCCC | 258 | 650987 | 172 | 740272 | 5.22E-08 | 1.50 | 1.71 |
| CTGCCC | 409 | 650836 | 309 | 740135 | 5.30E-08 | 1.32 | 1.51 |
| TTTTTT | 2781 | 648464 | 2738 | 737706 | 8.60E-08 | 1.02 | 1.16 |
| CCCCAC | 362 | 650883 | 276 | 740168 | 5.32E-07 | 1.31 | 1.49 |
| CCCCTT | 291 | 650954 | 214 | 740230 | 1.33E-06 | 1.36 | 1.55 |
| CCCCCA | 354 | 650891 | 273 | 740171 | 1.45E-06 | 1.30 | 1.47 |
| TCCCCT | 354 | 650891 | 273 | 740171 | 1.45E-06 | 1.30 | 1.47 |
| TATATA | 588 | 650657 | 500 | 739944 | 1.77E-06 | 1.18 | 1.34 |
| CCGTAC | 23 | 651222 | 2 | 740442 | 2.51E-06 | 11.50 | 13.07 |

**Supplementary Table 2:** List of elements enriched in the 3’UTRs of transcripts that were destabilized in iPS cells.

***Fold Difference** = # of hexamers in destabilized genes/ # of hexamers in stabilized genes

****Odds ratio** = frequency of hexamer in destabilized genes/ frequency of hexamer in stabilized genes

(Frequency of hexamer in destabilized genes = # of hexamer in destabilized genes/ # of all other hexamers in destabilized genes)
