# Supplementary material for: Global analysis reveals multiple pathways for unique regulation of mRNA decay in induced pluripotent stem cells
Source: HighWire-hosted journal article supplement (doi:10.1101/gr.134312.111), 2012-04-25
Supplement: SuppTab_1hexamers.xlsx [file SuppTab_1hexamers.xlsx]

## Sheet: Suppl. Table 1A
	5'UTR				ORF				3'UTR
Hexamer	# of hexamer in unstable mRNAs	# of hexamer in stable mRNAs	P-value	Score	# of hexamer in unstable mRNAs	# of hexamer in stable mRNAs	P-value	Score	# of hexamer in unstable mRNAs	# of hexamer in stable mRNAs	P-value	Score
AAAAAA	81	143	1.30102e-07	6.88572	501	373	0.153448	-0.81404	2013	1408	6.63e-07	-6.17868
AAAAAC	10	38	3.73447e-06	5.42777	374	353	0.0623346	1.20527	400	359	0.29046	0.536914
AAAAAG	54	49	0.843417	0.0739579	622	405	0.000270982	-3.56706	564	498	0.323958	0.489512
AAAAAU	27	47	0.00333127	2.47739	386	371	0.0311214	1.50694	807	854	8.97e-07	6.04711
AAAACA	16	44	2.42741e-05	4.61486	416	409	0.0105889	1.97515	459	461	0.00436534	2.35998
AAAACC	12	34	0.000167348	3.77638	337	307	0.191349	0.718173	270	217	0.750047	-0.124912
AAAACG	9	10	0.648563	0.188048	129	83	0.0847018	-1.07211	73	52	0.419654	-0.377109
AAAACU	17	35	0.00310046	2.50857	341	277	0.903527	-0.044059	365	364	0.0140356	1.85277
AAAAGA	36	62	0.000768606	3.1143	642	441	0.00406888	-2.39053	518	483	0.070253	1.15334
AAAAGC	38	33	1	0	407	325	0.738146	-0.131858	275	317	7.17e-05	4.14422
AAAAGG	36	44	0.117708	0.929196	402	357	0.290093	0.537462	338	289	0.718268	0.143713
AAAAGU	24	33	0.0844481	1.07341	326	297	0.197725	0.703938	397	338	0.738935	0.131394
AAAAUA	20	38	0.00354613	2.45024	276	264	0.0763425	1.11723	699	757	4.72e-07	6.32577
AAAAUC	19	27	0.103664	0.984374	270	292	0.00125285	2.9021	284	329	4.04e-05	4.39331
AAAAUG	13	32	0.000868323	3.06132	459	381	0.889691	0.0507606	604	543	0.181983	0.739969
AAAAUU	27	33	0.195528	0.70879	281	307	0.000571761	3.24279	587	617	4.94e-05	4.30638
AAACAA	18	47	2.76964e-05	4.55758	344	319	0.118577	0.925998	426	402	0.0694103	1.15858
AAACAC	15	22	0.136867	0.863702	243	204	0.81237	0.0902464	208	223	0.00890886	2.05018
AAACAG	17	37	0.00144505	2.84012	462	355	0.360609	-0.442963	281	248	0.512423	0.290371
AAACAU	8	12	0.263933	0.578506	226	296	1.1559e-07	6.93708	279	354	1.23e-07	6.91075
AAACCA	18	42	0.000237193	3.6249	396	331	0.823069	0.0845638	270	244	0.35222	0.453186
AAACCC	19	20	0.52608	0.278948	235	308	6.17381e-08	7.20945	187	187	0.0773332	1.11163
AAACCG	11	10	1	0	79	55	0.385502	-0.413974	42	20	0.0411925	-1.38518
AAACCU	10	28	0.000881327	3.05486	294	305	0.00456737	2.34033	241	220	0.325921	0.486888
AAACGA	8	3	0.24137	-0.617317	110	67	0.0587632	-1.23089	39	36	0.645132	0.190351
AAACGC	13	10	0.837272	-0.0771334	87	62	0.411246	-0.385899	33	29	0.898662	0.0464038
AAACGG	11	5	0.317116	-0.498781	114	65	0.019718	-1.70514	32	24	0.788794	-0.103036
AAACGU	9	7	1	0	84	54	0.171412	-0.765959	89	44	0.0051291	-2.28996
AAACUA	6	19	0.00400068	2.39787	149	126	0.808792	0.0921633	192	218	0.0017445	2.75833
AAACUC	16	26	0.0446952	1.34974	226	230	0.0237846	1.6237	181	188	0.0321022	1.49347
AAACUG	27	32	0.240522	0.618845	387	275	0.0722695	-1.14104	346	283	0.872731	-0.0591196
AAACUU	23	41	0.00540452	2.26724	232	226	0.074223	1.12946	364	319	0.489206	0.310508
AAAGAA	46	81	7.87034e-05	4.10401	797	663	0.812842	0.0899941	546	575	7.35e-05	4.13383
AAAGAC	27	25	0.7831	0.106183	351	299	0.664582	0.177452	203	225	0.00302634	2.51908
AAAGAG	34	50	0.0158333	1.80043	508	364	0.0483465	-1.31563	296	291	0.0421972	1.37472
AAAGAU	15	21	0.18064	0.743186	365	330	0.208468	0.680961	277	285	0.0123494	1.90835
AAAGCA	25	33	0.114255	0.942125	428	331	0.422336	-0.374342	329	339	0.00575042	2.2403
AAAGCC	42	40	0.658895	0.181184	437	421	0.0196196	1.70731	190	201	0.0169733	1.77023
AAAGCG	25	11	0.066447	-1.17752	108	65	0.0472617	-1.32549	48	22	0.0220279	-1.65703
AAAGCU	31	29	0.796124	0.0990194	330	333	0.00886539	2.0523	257	267	0.0108839	1.96322
AAAGGA	41	69	0.000538958	3.26844	489	463	0.02903	1.53715	348	349	0.0133552	1.87435
AAAGGC	23	38	0.014155	1.84909	283	259	0.210769	0.676193	177	165	0.302145	0.519785
AAAGGG	37	38	0.487489	0.312035	218	216	0.053564	1.27113	258	197	0.396668	-0.401573
AAAGGU	21	26	0.242255	0.615727	178	185	0.0266286	1.57465	227	167	0.244566	-0.611603
AAAGUA	9	20	0.0153522	1.81383	215	161	0.406995	-0.390411	300	283	0.134129	0.872479
AAAGUC	15	23	0.102493	0.989307	212	203	0.126099	0.899289	182	162	0.55143	0.25851
AAAGUG	24	32	0.108592	0.964201	339	307	0.220308	0.656969	275	268	0.0638441	1.19488
AAAGUU	29	24	1	0	251	240	0.093407	1.02962	374	300	0.670434	-0.173644
AAAUAA	22	44	0.00115563	2.93718	241	211	0.508266	0.293909	636	701	2.64e-07	6.57792
AAAUAC	11	22	0.0223673	1.65039	215	209	0.0875145	1.05792	288	291	0.0193457	1.71341
AAAUAG	9	14	0.209082	0.679683	146	129	0.54518	0.26346	278	258	0.208312	0.681286
AAAUAU	12	25	0.0123763	1.90741	229	247	0.00316137	2.50013	576	602	8.61e-05	4.06476
AAAUCA	11	33	0.00012148	3.91549	305	322	0.00172744	2.7626	284	347	1.49e-06	5.82751
AAAUCC	20	19	0.75135	0.124158	252	240	0.102913	0.987531	175	161	0.352121	0.453308
AAAUCG	10	2	0.0451458	-1.34538	73	66	0.609301	0.215168	38	27	0.618639	-0.208563
AAAUCU	16	17	0.602074	0.22035	249	238	0.101017	0.995606	292	284	0.0596609	1.22431
AAAUGA	17	34	0.00449909	2.34688	335	349	0.00208666	2.68055	421	414	0.0149412	1.82561
AAAUGC	15	31	0.00459297	2.33791	279	241	0.566976	0.246435	301	239	0.634463	-0.197594
AAAUGG	17	20	0.410135	0.387074	350	344	0.0180137	1.7444	291	305	0.00509792	2.29261
AAAUGU	8	20	0.007883	2.10331	272	386	3.08505e-12	11.5107	575	502	0.426055	0.370534
AAAUUA	15	34	0.00138938	2.85718	192	198	0.0251278	1.59985	390	444	5.87e-06	5.23115
AAAUUC	20	25	0.232765	0.633081	230	287	2.10845e-06	5.67604	262	274	0.00808606	2.09226
AAAUUG	10	13	0.403802	0.393832	231	182	0.692591	-0.159523	333	290	0.573186	0.241705
AAAUUU	21	28	0.151406	0.819856	215	252	0.000132458	3.87792	557	510	0.116687	0.932978
AACAAA	22	47	0.000380579	3.41956	360	344	0.0447188	1.34951	392	386	0.0191671	1.71744
AACAAC	10	19	0.0410051	1.38716	322	253	0.615134	-0.21103	148	146	0.143353	0.843594
AACAAG	14	31	0.00254135	2.59494	397	340	0.578755	0.237505	188	163	0.707579	0.150225
AACAAU	6	12	0.0989235	1.0047	192	196	0.0321867	1.49232	180	237	3.43e-06	5.46451
AACACA	13	36	0.000143104	3.84435	285	221	0.531939	-0.274138	212	239	0.00127729	2.89371
AACACC	12	19	0.105691	0.975962	264	190	0.171481	-0.765784	101	108	0.0709193	1.14924
AACACG	13	9	0.673735	-0.171511	73	61	0.931004	0.0310483	42	35	1	0
AACACU	14	18	0.289283	0.538678	196	170	0.599886	0.221931	214	189	0.548479	0.26084
AACAGA	22	31	0.074876	1.12566	427	334	0.512159	-0.290595	233	245	0.0100758	1.99672
AACAGC	28	31	0.361632	0.441733	560	311	2.13615e-08	-7.67037	176	132	0.390885	-0.407951
AACAGG	20	25	0.232765	0.633081	299	228	0.405857	-0.391627	150	139	0.37554	0.425344
AACAGU	9	24	0.00259598	2.5857	288	209	0.176499	-0.753257	197	176	0.499123	0.301792
AACAUA	9	6	0.797085	-0.0984952	102	148	1.0187e-05	4.99196	143	196	5.36e-06	5.27059
AACAUC	9	16	0.106708	0.971802	303	305	0.012851	1.89106	112	147	0.000279753	3.55323
AACAUG	11	17	0.13297	0.876247	257	266	0.00834227	2.07872	209	214	0.0316936	1.49903
AACAUU	10	11	0.663462	0.178184	230	230	0.0350079	1.45583	308	313	0.0124129	1.90613
AACCAA	16	29	0.0162815	1.78831	277	216	0.587163	-0.231241	220	192	0.621028	0.206889
AACCAC	18	17	0.865818	0.0625733	277	192	0.0777096	-1.10953	140	142	0.094299	1.02549
AACCAG	19	34	0.0123839	1.90714	449	355	0.619734	-0.207795	175	141	0.821259	-0.0855199
AACCAU	7	14	0.0786173	1.10448	163	229	1.45761e-07	6.83636	165	160	0.164089	0.784921
AACCCA	21	27	0.192509	0.715548	267	234	0.472755	0.325364	165	185	0.00520613	2.28348
AACCCC	27	26	0.682042	0.166189	289	159	4.23709e-05	-4.37293	144	117	0.901083	-0.045235
AACCCG	18	15	1	0	102	74	0.449022	-0.347733	30	20	0.480122	-0.318648
AACCCU	23	25	0.469899	0.327995	200	309	1.80263e-12	11.7441	169	146	0.734495	0.134011
AACCGA	8	10	0.483152	0.315916	92	52	0.0359319	-1.44452	31	21	0.489835	-0.30995
AACCGC	20	18	1	0	108	67	0.0803321	-1.09511	20	14	0.731258	-0.135929
AACCGG	12	15	0.341716	0.466335	98	69	0.351094	-0.454577	27	8	0.00982651	-2.0076
AACCGU	9	6	0.797085	-0.0984952	53	52	0.378377	0.422076	37	18	0.0773627	-1.11147
AACCUA	7	13	0.116187	0.934842	116	103	0.587186	0.231224	114	120	0.0761148	1.11853
AACCUC	17	16	0.86209	0.0644475	256	209	0.962858	-0.0164378	152	147	0.201263	0.696236
AACCUG	16	27	0.0322277	1.49177	382	358	0.0760926	1.11866	223	175	0.580114	-0.236487
AACCUU	4	27	4.30053e-06	5.36648	178	217	9.47395e-05	4.02347	178	162	0.414067	0.382929
AACGAA	7	7	0.795029	0.0996171	85	73	0.810631	0.0911768	34	29	1	0
AACGAC	8	7	1	0	103	63	0.0725771	-1.1392	16	10	0.557237	-0.25396
AACGAG	13	9	0.673735	-0.171511	132	96	0.387204	-0.41206	24	19	1	0
AACGAU	2	1	1	0	58	45	0.843174	-0.0740828	27	26	0.679365	0.167897
AACGCA	8	8	0.805917	0.0937098	86	49	0.0463083	-1.33434	30	20	0.480122	-0.318648
AACGCC	18	10	0.343743	-0.463766	117	71	0.0476513	-1.32193	18	15	1	0
AACGCG	17	5	0.0316655	-1.49941	28	17	0.370226	-0.431533	7	7	0.792231	0.101148
AACGCU	6	7	0.592154	0.227565	65	67	0.190975	0.719024	28	28	0.504634	0.297024
AACGGA	12	6	0.347105	-0.459539	120	61	0.00212741	-2.67215	25	12	0.137261	-0.862454
AACGGC	18	7	0.0734894	-1.13378	131	64	0.000531834	-3.27422	24	11	0.125675	-0.900752
AACGGG	17	6	0.0604773	-1.21841	128	61	0.000421662	-3.37504	38	24	0.309973	-0.508676
AACGGU	5	3	0.732826	-0.134999	56	43	0.762859	-0.117556	18	22	0.266435	0.574409
AACGUA	5	2	0.462548	-0.334843	37	26	0.61313	-0.212448	31	26	1	0
AACGUC	14	7	0.278245	-0.555573	85	62	0.507816	-0.294294	35	24	0.514624	-0.28851
AACGUG	11	8	0.820038	-0.0861662	153	115	0.499718	-0.301275	59	43	0.551448	-0.258496
AACGUU	9	4	0.405222	-0.392307	57	50	0.77103	0.112929	64	37	0.0890117	-1.05055
AACUAA	6	17	0.0105864	1.97525	93	91	0.236767	0.625679	142	184	7.35e-05	4.13346
AACUAC	9	20	0.0153522	1.81383	157	168	0.0190801	1.71942	91	99	0.0683642	1.16517
AACUAG	7	9	0.460215	0.337039	87	55	0.130016	-0.886003	103	92	0.615448	0.210808
AACUAU	4	8	0.245974	0.609111	127	134	0.0463848	1.33362	151	156	0.0585074	1.23279
AACUCA	13	25	0.0214978	1.66761	245	265	0.0021052	2.67671	184	180	0.126749	0.897057
AACUCC	21	26	0.242255	0.615727	264	217	1	0	149	149	0.116142	0.935009
AACUCG	4	6	0.528922	0.276608	74	55	0.596511	-0.224381	33	20	0.27373	-0.562678
AACUCU	10	31	0.000214118	3.66935	220	217	0.0606758	1.21698	211	182	0.722987	0.14087
AACUGA	22	29	0.159526	0.797167	259	210	0.926066	-0.0333579	226	208	0.289147	0.538881
AACUGC	23	21	0.880481	0.0552801	274	239	0.505822	0.296002	173	145	0.955111	0.019946
AACUGG	24	26	0.47862	0.320009	329	300	0.19968	0.699666	210	159	0.402847	-0.39486
AACUGU	11	18	0.0955431	1.0198	214	201	0.18281	0.737999	269	177	0.0173015	-1.76192
AACUUA	5	20	0.000898416	3.04652	103	120	0.0103958	1.98314	187	153	0.913301	-0.0393862
AACUUC	27	26	0.682042	0.166189	286	264	0.170548	0.768154	167	154	0.369788	0.432047
AACUUG	17	29	0.0259423	1.58599	173	204	0.000508642	3.29359	249	200	0.740158	-0.130675
AACUUU	39	38	0.647784	0.18857	193	230	0.000134185	3.8723	374	340	0.229202	0.639782
AAGAAA	39	87	3.558e-07	6.44879	953	761	0.576507	-0.239195	597	596	0.00151459	2.8197
AAGAAC	22	35	0.0236987	1.62528	426	384	0.191323	0.718232	173	168	0.157303	0.803263
AAGAAG	44	86	5.62818e-06	5.24963	1041	719	0.000353551	-3.45155	267	293	0.00106495	2.97267
AAGAAU	14	22	0.0934986	1.02919	366	437	1.17683e-07	6.92929	307	355	2.38e-05	4.62293
AAGACA	25	47	0.00130149	2.88556	432	405	0.0560566	1.25137	215	248	0.000452204	3.34467
AAGACC	27	29	0.423438	0.37321	328	321	0.0270856	1.56726	164	132	0.815467	-0.0885938
AAGACG	25	9	0.0244837	-1.61112	139	99	0.297478	-0.526545	37	28	0.803494	-0.0950175
AAGACU	21	32	0.0526976	1.27821	264	265	0.0229824	1.6386	187	196	0.0238755	1.62205
AAGAGA	51	68	0.0211048	1.67562	525	475	0.127136	0.895732	296	306	0.00774304	2.11109
AAGAGC	35	39	0.294257	0.531274	430	319	0.174266	-0.758789	177	158	0.510811	0.29174
AAGAGG	47	52	0.2266	0.64474	530	370	0.017325	-1.76133	214	206	0.141365	0.849658
AAGAGU	17	35	0.00310046	2.50857	271	234	0.591569	0.227995	193	180	0.274859	0.56089
AAGAUA	10	13	0.403802	0.393832	209	268	1.24978e-06	5.90317	186	198	0.0159237	1.79796
AAGAUC	13	21	0.0846748	1.07225	336	293	0.470734	0.327224	133	117	0.65705	0.182401
AAGAUG	27	22	0.886986	-0.0520835	613	476	0.37705	-0.423601	239	248	0.0157568	1.80253
AAGAUU	19	21	0.432799	0.363714	282	271	0.0661172	1.17969	235	251	0.00620221	2.20745
AAGCAA	21	46	0.0003079	3.51159	381	299	0.563427	-0.249163	247	272	0.00147641	2.83079
AAGCAC	19	23	0.281785	0.550082	348	207	0.000237144	-3.62499	154	170	0.0119197	1.92373
AAGCAG	39	47	0.129888	0.88643	640	432	0.00172637	-2.76287	231	212	0.294256	0.531275
AAGCAU	8	20	0.007883	2.10331	231	206	0.387406	0.411834	185	214	0.00105714	2.97587
AAGCCA	42	56	0.0331156	1.47997	463	404	0.374957	0.426018	217	198	0.349028	0.45714
AAGCCC	23	27	0.320854	0.493693	447	285	0.000818659	-3.0869	160	127	0.722288	-0.14129
AAGCCG	50	26	0.0383554	-1.41617	151	93	0.0287795	-1.54092	53	26	0.0312015	-1.50582
AAGCCU	29	33	0.308344	0.510965	359	379	0.000658024	3.18176	202	206	0.0413517	1.38351
AAGCGA	18	9	0.246417	-0.608329	115	81	0.315052	-0.501618	37	24	0.37014	-0.431634
AAGCGC	23	10	0.0804206	-1.09463	156	96	0.0266592	-1.57415	28	10	0.0216206	-1.66513
AAGCGG	44	21	0.0252638	-1.5975	226	94	1.06276e-08	-7.97357	33	13	0.025292	-1.59702
AAGCGU	8	7	1	0	69	37	0.0400117	-1.39781	30	30	0.517609	0.285998
AAGCUA	11	15	0.246043	0.60899	126	122	0.20208	0.694478	153	154	0.0964582	1.01566
AAGCUC	23	29	0.210202	0.677363	294	226	0.480748	-0.318082	132	128	0.213483	0.670636
AAGCUG	39	40	0.432248	0.364267	566	464	1	0	250	210	0.925396	0.0336725
AAGCUU	20	27	0.143332	0.843657	219	263	3.60402e-05	4.44321	210	184	0.612985	0.21255
AAGGAA	47	51	0.265518	0.575907	545	519	0.0162077	1.79028	407	380	0.107018	0.970543
AAGGAC	28	31	0.361632	0.441733	369	331	0.254423	0.594444	167	136	0.908149	-0.0418428
AAGGAG	71	76	0.186271	0.729855	714	549	0.25786	-0.588616	231	214	0.253427	0.596147
AAGGAU	7	35	1.10479e-06	5.95672	306	292	0.0704735	1.15197	176	170	0.160799	0.793718
AAGGCA	15	44	1.1143e-05	4.953	315	288	0.190437	0.720248	209	205	0.0933308	1.02998
AAGGCC	25	26	0.57469	0.240566	417	316	0.298583	-0.524936	137	113	1	0
AAGGCG	49	15	0.000225981	-3.64593	110	91	1	0	29	24	1	0
AAGGCU	24	37	0.0283929	1.54679	287	270	0.11505	0.939112	178	164	0.35591	0.44866
AAGGGA	49	42	1	0	257	229	0.386427	0.412933	264	225	0.785332	0.104946
AAGGGC	29	30	0.51486	0.288311	288	210	0.191902	-0.716921	160	100	0.0250105	-1.60188
AAGGGG	44	39	0.91261	0.039715	249	195	0.633637	-0.19816	206	159	0.494761	-0.305605
AAGGGU	13	16	0.356456	0.447994	129	107	0.947918	0.0232292	142	110	0.612924	-0.212593
AAGGUA	12	9	0.82921	-0.0813353	82	114	0.000308902	3.51018	143	119	1	0
AAGGUC	16	31	0.00794266	2.10003	180	179	0.0713968	1.14632	100	80	0.82264	-0.0847902
AAGGUG	24	26	0.47862	0.320009	370	325	0.380716	0.419399	198	154	0.556204	-0.254766
AAGGUU	14	21	0.126397	0.898265	156	158	0.0693894	1.15871	213	160	0.349402	-0.456675
AAGUAA	8	21	0.00496717	2.30389	142	123	0.666179	0.176409	232	238	0.0231362	1.63571
AAGUAC	7	8	0.613289	0.212335	218	170	0.646175	-0.18965	115	117	0.129395	0.888082
AAGUAG	15	14	0.853936	0.0685744	149	85	0.00703017	-2.15303	152	144	0.267558	0.572581
AAGUAU	4	19	0.000509221	3.29309	151	159	0.0300165	1.52264	221	212	0.13484	0.870182
AAGUCA	8	20	0.007883	2.10331	283	272	0.06655	1.17685	199	187	0.239634	0.620452
AAGUCC	16	18	0.492776	0.30735	246	208	0.777233	0.109449	112	100	0.629364	0.201098
AAGUCG	16	6	0.0881501	-1.05478	72	56	0.790363	-0.102173	29	15	0.172321	-0.763661
AAGUCU	13	30	0.0020573	2.6867	225	205	0.286577	0.542759	176	152	0.739496	0.131064
AAGUGA	30	34	0.315853	0.500515	304	259	0.672014	0.172622	239	210	0.569567	0.244455
AAGUGC	27	21	0.773716	-0.111418	277	191	0.0632767	-1.19876	194	152	0.627035	-0.202709
AAGUGG	18	44	0.000101888	3.99188	346	306	0.345121	0.462029	198	196	0.0853278	1.06891
AAGUGU	11	18	0.0955431	1.0198	209	211	0.0349833	1.45614	232	196	0.884225	0.053437
AAGUUA	8	13	0.18932	0.722804	143	135	0.252431	0.597858	228	184	0.804615	-0.0944118
AAGUUC	20	17	1	0	280	267	0.0855602	1.06773	157	164	0.0434357	1.36215
AAGUUG	25	34	0.0894299	1.04852	203	187	0.263115	0.579854	232	163	0.105822	-0.975423
AAGUUU	31	18	0.199341	-0.700403	202	233	0.000425063	3.37155	357	282	0.551147	-0.258733
AAUAAA	19	42	0.00044356	3.35305	264	206	0.610169	-0.21455	725	781	4.9e-07	6.30993
AAUAAC	8	16	0.0632734	1.19878	97	97	0.171169	0.766574	150	173	0.00359723	2.44403
AAUAAG	8	19	0.0187717	1.7265	142	94	0.116257	-0.934582	173	190	0.00832642	2.07954
AAUAAU	17	16	0.86209	0.0644475	139	146	0.0427825	1.36873	375	447	2.43e-07	6.61424
AAUACA	5	19	0.00154058	2.81231	184	180	0.102375	0.989805	239	257	0.00444492	2.35214
AAUACC	1	6	0.0541508	1.2664	148	139	0.260134	0.584803	110	115	0.0939317	1.02719
AAUACG	3	8	0.127154	0.895669	45	46	0.29475	0.530547	29	33	0.250948	0.600416
AAUACU	12	9	0.82921	-0.0813353	143	135	0.252431	0.597858	220	225	0.0285284	1.54472
AAUAGA	11	15	0.246043	0.60899	126	118	0.304232	0.516795	180	221	0.000107333	3.96927
AAUAGC	2	13	0.00276994	2.55753	100	90	0.559906	0.251885	120	105	0.737863	0.132024
AAUAGG	8	9	0.631952	0.199316	63	45	0.499617	-0.301363	132	111	0.948663	0.022888
AAUAGU	8	8	0.805917	0.0937098	96	64	0.204362	-0.689601	174	184	0.022488	1.64805
AAUAUA	7	18	0.0143784	1.84229	89	119	0.000476838	3.32163	364	381	0.00173956	2.75956
AAUAUC	6	14	0.0421359	1.37535	127	150	0.00251807	2.59893	145	173	0.00130399	2.88473
AAUAUG	6	11	0.147812	0.830289	184	199	0.00751736	2.12393	234	266	0.000529226	3.27636
AAUAUU	14	14	0.708487	0.149668	179	210	0.000514241	3.28883	472	475	0.00328447	2.48353
AAUCAA	10	26	0.00219522	2.65852	208	222	0.00663055	2.17845	177	234	2.93e-06	5.53284
AAUCAC	12	15	0.341716	0.466335	159	142	0.487142	0.312344	128	149	0.00542987	2.26521
AAUCAG	13	28	0.00696854	2.15686	274	231	0.788489	0.103204	181	205	0.00252089	2.59845
AAUCAU	7	18	0.0143784	1.84229	145	173	0.00104881	2.97931	166	207	9.26e-05	4.03322
AAUCCA	24	17	0.639092	-0.194437	253	241	0.103535	0.984914	154	163	0.0320351	1.49437
AAUCCC	23	16	0.630509	-0.200309	172	133	0.645335	-0.190214	127	159	0.00055706	3.2541
AAUCCG	9	4	0.405222	-0.392307	64	31	0.0172898	-1.76221	29	21	0.672017	-0.172619
AAUCCU	18	13	0.720079	-0.14262	206	224	0.00362395	2.44082	147	178	0.000803241	3.09515
AAUCGA	5	3	0.732826	-0.134999	54	73	0.00557861	2.25347	30	13	0.0475136	-1.32318
AAUCGC	5	7	0.564632	0.248235	52	44	0.918474	0.0369333	15	21	0.13306	0.875954
AAUCGG	14	4	0.0563715	-1.24894	62	41	0.322177	-0.491906	30	19	0.391277	-0.407516
AAUCGU	5	2	0.462548	-0.334843	35	33	0.626395	0.203152	25	24	0.667779	0.175367
AAUCUA	3	12	0.00946599	2.02383	98	94	0.309939	0.508724	127	140	0.0228001	1.64206
AAUCUC	19	16	1	0	159	141	0.523525	0.281063	135	139	0.0785087	1.10508
AAUCUG	16	11	0.700327	-0.154699	241	213	0.45053	0.346277	227	209	0.290106	0.537443
AAUCUU	13	17	0.275249	0.560274	156	163	0.0324802	1.48838	270	245	0.330196	0.481229
AAUGAA	19	32	0.0236955	1.62533	387	422	5.51653e-05	4.25833	329	383	7.16e-06	5.14508
AAUGAC	10	13	0.403802	0.393832	214	220	0.020502	1.6882	134	178	3.96e-05	4.40213
AAUGAG	20	18	1	0	249	243	0.0570486	1.24376	231	207	0.44265	0.35394
AAUGAU	7	20	0.00576541	2.23917	225	220	0.0701419	1.15402	224	216	0.125365	0.901825
AAUGCA	8	19	0.0187717	1.7265	277	279	0.016935	1.77121	261	232	0.46924	0.328605
AAUGCC	11	18	0.0955431	1.0198	262	241	0.209667	0.678471	144	132	0.432074	0.364442
AAUGCG	6	4	0.760933	-0.118654	45	49	0.178751	0.747751	39	19	0.0641901	-1.19253
AAUGCU	12	17	0.195901	0.707963	232	208	0.362941	0.440164	211	211	0.0566838	1.24654
AAUGGA	14	26	0.0251325	1.59976	398	385	0.0235799	1.62746	255	238	0.205261	0.687694
AAUGGC	17	7	0.104491	-0.980923	240	220	0.241674	0.61677	121	154	0.00043074	3.36578
AAUGGG	11	11	0.831538	0.0801177	206	242	0.000170029	3.76948	185	158	0.828302	0.0818113
AAUGGU	9	17	0.0746063	1.12722	197	165	0.874141	0.0584185	177	174	0.120013	0.920771
AAUGUA	8	11	0.360908	0.442603	146	230	4.97259e-10	9.30342	352	329	0.133206	0.875477
AAUGUC	6	16	0.016973	1.77024	174	208	0.000254635	3.59408	179	155	0.741632	0.129812
AAUGUG	13	11	1	0	282	572	6.85141e-38	37.1642	336	323	0.0657971	1.18179
AAUGUU	4	14	0.00840895	2.07526	167	155	0.287341	0.541602	438	336	0.27878	-0.554738
AAUUAA	23	17	0.751608	-0.124009	153	152	0.106974	0.970723	298	365	6.72e-07	6.17272
AAUUAC	4	15	0.00488352	2.31127	131	148	0.00805956	2.09369	142	154	0.0227439	1.64314
AAUUAG	7	21	0.00360536	2.44305	91	78	0.816743	0.0879144	177	194	0.00779451	2.10821
AAUUAU	9	24	0.00259598	2.5857	128	172	2.70237e-05	4.56825	301	353	1.24e-05	4.9067
AAUUCA	12	23	0.0263958	1.57847	237	391	6.40411e-18	17.1935	205	301	2.34e-10	9.63072
AAUUCC	7	33	3.47064e-06	5.45959	193	201	0.019764	1.70412	181	153	0.912493	0.0397706
AAUUCG	7	4	0.56171	-0.250488	52	32	0.227824	-0.642401	20	16	1	0
AAUUCU	15	21	0.18064	0.743186	217	230	0.0077016	2.11342	290	324	0.000258215	3.58802
AAUUGA	16	19	0.397476	0.40069	185	149	0.869161	-0.0608996	199	179	0.438978	0.357558
AAUUGC	9	14	0.209082	0.679683	145	110	0.571227	-0.243191	149	135	0.474876	0.323419
AAUUGG	20	18	1	0	149	149	0.0914768	1.03869	173	128	0.325665	-0.487228
AAUUGU	7	18	0.0143784	1.84229	107	121	0.0165028	1.78244	329	278	0.838557	0.0764676
AAUUUA	13	18	0.209305	0.67922	139	149	0.0244125	1.61239	357	408	1.07e-05	4.96994
AAUUUC	21	17	0.872568	-0.059201	156	201	2.46874e-05	4.60753	271	275	0.0202165	1.69429
AAUUUG	18	15	1	0	179	192	0.0105191	1.97802	333	286	0.686525	0.163344
AAUUUU	20	35	0.0100995	1.9957	196	225	0.000598119	3.22321	682	588	0.516705	0.286758
ACAAAA	20	47	0.000110287	3.95748	373	322	0.517059	0.28646	464	409	0.395307	0.403066
ACAAAC	10	25	0.00342741	2.46503	227	203	0.383286	0.416477	161	171	0.0273289	1.56338
ACAAAG	21	24	0.371279	0.4303	353	293	0.905594	0.0430666	210	208	0.0768591	1.1143
ACAAAU	12	27	0.00560272	2.2516	271	316	2.24464e-05	4.64885	230	290	2.26e-06	5.64582
ACAACA	13	24	0.0307543	1.51209	391	313	0.761891	-0.118107	151	175	0.00313336	2.50399
ACAACC	13	17	0.275249	0.560274	246	214	0.542694	0.265445	105	83	0.769739	-0.113657
ACAACG	3	5	0.483911	0.315235	107	79	0.507475	-0.294585	22	19	1	0
ACAACU	12	17	0.195901	0.707963	236	216	0.256707	0.590562	103	147	2.49e-05	4.60352
ACAAGA	20	26	0.183638	0.736038	399	338	0.683902	0.165006	158	182	0.00270395	2.568
ACAAGC	7	23	0.000822718	3.08475	331	244	0.208684	-0.680512	111	118	0.0632758	1.19876
ACAAGG	13	26	0.0148909	1.82708	341	328	0.0432521	1.36399	138	130	0.326284	0.486404
ACAAGU	17	18	0.612034	0.213225	259	236	0.258794	0.587046	159	144	0.453838	0.343099
ACAAUA	2	15	0.000434559	3.36195	135	153	0.00641738	2.19264	148	159	0.0253181	1.59657
ACAAUC	7	9	0.460215	0.337039	113	93	1	0	98	106	0.0672422	1.17236
ACAAUG	9	16	0.106708	0.971802	239	239	0.0343602	1.46394	146	178	0.000642757	3.19195
ACAAUU	7	21	0.00360536	2.44305	145	172	0.00125817	2.90026	175	174	0.0956638	1.01925
ACACAA	14	23	0.0683736	1.16511	239	184	0.525521	-0.27941	144	179	0.000334619	3.47545
ACACAC	10	68	5.5817e-14	13.2532	201	159	0.750756	-0.124501	306	313	0.00975192	2.01091
ACACAG	18	46	4.29411e-05	4.36713	389	382	0.013793	1.86034	262	229	0.586589	0.231666
ACACAU	11	19	0.0677037	1.16939	181	194	0.0109017	1.9625	202	224	0.00296712	2.52767
ACACCA	10	22	0.0124033	1.90646	380	323	0.649389	0.187495	142	150	0.0454734	1.34224
ACACCC	24	28	0.330264	0.481139	284	188	0.0233184	-1.6323	117	96	0.945234	-0.0244606
ACACCG	14	12	1	0	121	90	0.489815	-0.309968	41	26	0.326556	-0.486042
ACACCU	15	29	0.00981853	2.00795	298	236	0.695602	-0.157639	130	145	0.0153316	1.81441
ACACGA	11	5	0.317116	-0.498781	72	56	0.790363	-0.102173	28	25	0.890443	0.0503938
ACACGC	12	15	0.341716	0.466335	87	70	0.936166	-0.0286472	32	31	0.613128	0.212449
ACACGG	11	16	0.182323	0.739159	110	114	0.0812951	1.08994	37	22	0.240046	-0.619706
ACACGU	7	8	0.613289	0.212335	67	41	0.147351	-0.831648	51	39	0.751212	-0.124237
ACACUA	5	7	0.564632	0.248235	107	74	0.263403	-0.57938	108	117	0.0519354	1.28454
ACACUC	15	30	0.0067425	2.17118	154	137	0.517113	0.286414	118	117	0.189992	0.721264
ACACUG	20	32	0.0359123	1.44476	288	362	7.41162e-08	7.13009	227	223	0.0797016	1.09853
ACACUU	17	15	1	0	154	152	0.108048	0.966382	231	187	0.806112	-0.0936048
ACAGAA	35	47	0.0463291	1.33415	495	431	0.372725	0.428612	281	307	0.000910786	3.04058
ACAGAC	22	34	0.0320011	1.49484	300	233	0.542336	-0.265732	185	132	0.19445	-0.711193
ACAGAG	22	57	4.03311e-06	5.39436	458	374	0.944467	-0.0248133	203	207	0.0418314	1.3785
ACAGAU	11	17	0.13297	0.876247	334	292	0.445414	0.351236	216	207	0.143128	0.844275
ACAGCA	27	38	0.0611734	1.21344	704	408	1.6048e-08	-7.79458	217	183	0.880386	0.0553271
ACAGCC	46	47	0.407362	0.39002	572	368	0.000238771	-3.62202	199	151	0.42078	-0.375945
ACAGCG	29	11	0.0176017	-1.75445	190	153	0.870832	-0.0600658	36	25	0.522357	-0.282033
ACAGCU	26	37	0.0572369	1.24232	446	357	0.723	-0.140862	222	182	0.920421	-0.0360136
ACAGGA	27	40	0.0277051	1.55744	377	335	0.291902	0.534762	200	184	0.330215	0.481203
ACAGGC	20	28	0.110729	0.955738	312	232	0.262653	-0.580617	172	155	0.470609	0.32734
ACAGGG	16	26	0.0446952	1.34974	205	197	0.12022	0.920024	180	182	0.0645941	1.18981
ACAGGU	10	23	0.0081523	2.08872	200	179	0.409157	0.38811	157	126	0.811312	-0.0908121
ACAGUA	10	11	0.663462	0.178184	165	113	0.14797	-0.829825	187	182	0.129684	0.887113
ACAGUC	12	19	0.105691	0.975962	237	175	0.298611	-0.524895	113	132	0.00840982	2.07521
ACAGUG	20	22	0.442406	0.354179	456	446	0.00901453	2.04506	247	202	0.886977	-0.0520875
ACAGUU	8	19	0.0187717	1.7265	242	188	0.594049	-0.226178	258	191	0.236101	-0.626903
ACAUAA	4	12	0.0240892	1.61818	112	153	4.247e-05	4.37192	160	220	1.14e-06	5.9447
ACAUAC	10	10	0.823958	0.0840949	89	102	0.023966	1.6204	126	134	0.0464289	1.33321
ACAUAG	10	7	0.809465	-0.0918017	76	103	0.000912362	3.03983	133	117	0.65705	0.182401
ACAUAU	6	8	0.434747	0.361763	87	107	0.0059688	2.22411	191	206	0.0100644	1.99721
ACAUCA	10	18	0.0596453	1.22442	384	405	0.000448918	3.34783	135	177	6.48e-05	4.18868
ACAUCC	10	20	0.0278397	1.55534	314	259	0.966526	0.0147867	107	120	0.0275898	1.55925
ACAUCG	11	3	0.104451	-0.981088	127	101	0.841884	-0.0747477	17	19	0.405294	0.39223
ACAUCU	8	19	0.0187717	1.7265	274	283	0.00725445	2.1394	170	166	0.139367	0.855839
ACAUGA	9	12	0.383179	0.416598	255	274	0.00219352	2.65886	161	189	0.00125868	2.90008
ACAUGC	10	8	1	0	221	169	0.508387	-0.293806	130	100	0.596425	-0.224444
ACAUGG	11	20	0.0473587	1.3246	291	265	0.232709	0.633186	176	170	0.160799	0.793718
ACAUGU	7	14	0.0786173	1.10448	175	170	0.129662	0.887187	232	218	0.201074	0.696644
ACAUUA	10	7	0.809465	-0.0918017	135	126	0.319682	0.495282	161	175	0.0157786	1.80193
ACAUUC	11	14	0.422953	0.373708	212	171	0.877674	-0.056667	150	188	0.000193681	3.71291
ACAUUG	9	12	0.383179	0.416598	204	222	0.00401953	2.39583	210	182	0.685061	0.164271
ACAUUU	25	34	0.0894299	1.04852	192	277	1.69218e-09	8.77155	465	437	0.0657812	1.1819
ACCAAA	18	26	0.0967267	1.01445	330	252	0.404771	-0.39279	246	202	0.924418	-0.0341315
ACCAAC	8	14	0.133432	0.874738	291	215	0.245624	-0.60973	109	110	0.154397	0.811361
ACCAAG	16	22	0.192384	0.715831	422	351	0.856661	0.0671911	185	134	0.237776	-0.623833
ACCAAU	5	11	0.0818435	1.08702	167	176	0.0225517	1.64682	109	116	0.0704032	1.15241
ACCACA	14	21	0.126397	0.898265	349	269	0.44265	-0.35394	153	194	9.81e-05	4.00846
ACCACC	39	31	0.810918	-0.0910228	570	305	8.48207e-10	-9.0715	172	123	0.219429	-0.658706
ACCACG	5	16	0.00741982	2.12961	155	94	0.021715	-1.66324	41	34	1	0
ACCACU	12	20	0.076062	1.11883	280	187	0.028837	-1.54005	159	142	0.5627	0.249723
ACCAGA	16	41	9.50315e-05	4.02213	405	384	0.0450561	1.34625	151	144	0.24247	0.615341
ACCAGC	32	41	0.100041	0.999821	646	383	3.64886e-07	-6.43784	202	130	0.0237501	-1.62434
ACCAGG	40	39	0.574908	0.240401	398	339	0.630393	0.200388	185	143	0.541981	-0.266016
ACCAGU	22	24	0.460957	0.33634	352	258	0.166757	-0.777917	161	112	0.161993	-0.790504
ACCAUA	7	6	1	0	128	129	0.103316	0.985834	89	124	0.000190144	3.72092
ACCAUC	11	20	0.0473587	1.3246	308	321	0.00299528	2.52356	126	111	0.648668	0.187977
ACCAUG	5	9	0.190961	0.719056	268	258	0.0723159	1.14077	159	164	0.0572431	1.24228
ACCAUU	9	18	0.035035	1.4555	182	221	9.10461e-05	4.04074	191	160	0.957265	0.0189677
ACCCAA	13	22	0.0610791	1.21411	257	239	0.175762	0.755074	105	138	0.000380743	3.41937
ACCCAC	22	46	0.000553741	3.25669	334	202	0.000592902	-3.22702	153	137	0.55539	0.255402
ACCCAG	48	67	0.0112597	1.94847	515	355	0.0116411	-1.93401	223	194	0.658076	0.181724
ACCCAU	2	13	0.00276994	2.55753	206	160	0.63643	-0.19625	117	120	0.117198	0.931078
ACCCCA	24	31	0.138377	0.858935	504	283	2.30887e-07	-6.6366	248	164	0.025832	-1.58784
ACCCCC	69	29	0.00107951	-2.96677	499	172	2.96285e-25	-24.5283	217	113	5.07e-05	-4.29486
ACCCCG	60	23	0.000844906	-3.07319	221	100	3.84405e-07	-6.41521	64	42	0.243233	-0.613977
ACCCCU	28	24	1	0	341	169	4.89429e-08	-7.31031	208	110	0.000120932	-3.91746
ACCCGA	24	12	0.13443	-0.871503	116	66	0.0170915	-1.76722	18	17	0.736393	0.132891
ACCCGC	48	29	0.138714	-0.857881	164	70	2.61461e-06	-5.58259	43	19	0.0213786	-1.67002
ACCCGG	53	33	0.160049	-0.795747	182	108	0.00782086	-2.10675	50	21	0.00835482	-2.07806
ACCCGU	8	7	1	0	70	41	0.086711	-1.06193	35	13	0.0129848	-1.88656
ACCCUA	14	10	0.688013	-0.162403	107	206	1.74466e-13	12.7583	92	92	0.209099	0.679648
ACCCUC	52	39	0.530508	-0.275308	314	193	0.0015098	-2.82108	163	105	0.0429136	-1.36741
ACCCUG	41	49	0.138382	0.85892	409	383	0.0684751	1.16447	234	189	0.807121	-0.0930613
ACCCUU	17	24	0.119558	0.922422	200	185	0.259801	0.58536	192	128	0.0562036	-1.25024
ACCGAA	11	6	0.468346	-0.329433	109	65	0.0473036	-1.32511	16	22	0.142651	0.845726
ACCGAC	11	8	0.820038	-0.0861662	99	56	0.0289879	-1.53778	16	11	0.701638	-0.153887
ACCGAG	31	19	0.259648	-0.585615	196	135	0.121974	-0.913734	45	26	0.153143	-0.814902
ACCGAU	9	3	0.159918	-0.796104	52	39	0.752179	-0.123679	17	9	0.326829	-0.485679
ACCGCA	27	14	0.157861	-0.801724	143	98	0.174343	-0.758595	26	24	0.776868	0.109653
ACCGCC	69	24	6.45005e-05	-4.19044	203	92	1.37887e-06	-5.86048	46	17	0.00338545	-2.47038
ACCGCG	40	25	0.216519	-0.664504	74	41	0.0486729	-1.31271	10	10	0.823045	0.0845765
ACCGCU	25	12	0.100965	-0.99583	136	74	0.00437285	-2.35924	28	15	0.220014	-0.65755
ACCGGA	23	10	0.0804206	-1.09463	124	87	0.268989	-0.570265	30	13	0.0475136	-1.32318
ACCGGC	31	20	0.329657	-0.481938	186	103	0.00137081	-2.86302	40	13	0.00219839	-2.6579
ACCGGG	31	19	0.259648	-0.585615	140	110	0.750922	-0.124405	42	21	0.0581267	-1.23562
ACCGGU	5	9	0.190961	0.719056	53	41	0.83601	-0.0777886	24	7	0.0110938	-1.95492
ACCGUA	3	3	1	0	34	31	0.709342	0.149144	26	17	0.540626	-0.267103
ACCGUC	15	16	0.591583	0.227984	105	63	0.0524222	-1.28048	23	13	0.316248	-0.499973
ACCGUG	13	8	0.516811	-0.286668	125	95	0.58832	-0.230386	59	30	0.0326737	-1.4858
ACCGUU	4	4	1	0	56	38	0.407368	-0.390013	30	17	0.241681	-0.616757
ACCUAA	6	6	1	0	108	98	0.484405	0.314792	92	117	0.00220116	2.65735
ACCUAC	10	14	0.306124	0.514103	210	166	0.755872	-0.121552	73	77	0.163069	0.787629
ACCUAG	10	10	0.823958	0.0840949	83	80	0.307449	0.512227	103	82	0.82477	-0.0836674
ACCUAU	3	11	0.0280735	1.5517	106	123	0.00951019	2.02181	116	112	0.258867	0.586923
ACCUCA	18	27	0.0726726	1.13863	402	339	0.739684	0.130954	192	173	0.461757	0.335587
ACCUCC	37	40	0.360562	0.44302	480	287	1.79763e-05	-4.7453	195	158	0.830831	-0.0804872
ACCUCG	27	13	0.11162	-0.952258	137	76	0.00582293	-2.23486	44	31	0.562296	-0.250035
ACCUCU	21	19	0.875446	0.0577706	310	238	0.440022	-0.356526	227	174	0.451854	-0.345002
ACCUGA	21	25	0.30159	0.520582	359	311	0.509223	0.293092	143	157	0.0172992	1.76197
ACCUGC	30	36	0.176927	0.752207	525	386	0.102717	-0.988357	182	124	0.095765	-1.01879
ACCUGG	34	45	0.0702784	1.15318	565	467	0.925228	0.0337511	224	171	0.418962	-0.377825
ACCUGU	11	26	0.00442559	2.35403	305	256	0.799173	0.0973592	249	194	0.535026	-0.271625
ACCUUA	7	11	0.240941	0.61809	111	177	2.82137e-08	7.54954	125	128	0.100674	0.997082
ACCUUC	17	31	0.0131798	1.88009	358	285	0.721343	-0.141858	171	144	0.909992	0.0409624
ACCUUG	14	28	0.0083738	2.07708	193	200	0.0224482	1.64882	197	145	0.277656	-0.556493
ACCUUU	20	27	0.143332	0.843657	222	182	1	0	274	182	0.0210674	-1.67639
ACGAAA	10	6	0.618431	-0.208709	93	61	0.194966	-0.71004	29	29	0.511123	0.291475
ACGAAC	10	6	0.618431	-0.208709	64	44	0.385269	-0.414236	16	7	0.208284	-0.681345
ACGAAG	12	7	0.494036	-0.306241	132	79	0.0267629	-1.57247	46	18	0.00554487	-2.25611
ACGAAU	4	5	0.74126	0.130029	57	59	0.225606	0.646649	25	28	0.334248	0.475931
ACGACA	3	3	1	0	122	77	0.0748707	-1.12569	24	15	0.424437	-0.372187
ACGACC	13	10	0.837272	-0.0771334	133	66	0.000773094	-3.11177	15	9	0.540222	-0.267428
ACGACG	9	6	0.797085	-0.0984952	93	40	0.000460075	-3.33717	8	9	0.628655	0.201588
ACGACU	11	5	0.317116	-0.498781	84	72	0.80956	0.0917509	14	18	0.220411	0.656767
ACGAGA	13	8	0.516811	-0.286668	156	119	0.585558	-0.23243	25	18	0.759786	-0.119309
ACGAGC	21	9	0.0981715	-1.00801	153	79	0.000736322	-3.13293	20	18	0.871112	0.0599259
ACGAGG	12	13	0.689147	0.161688	209	110	0.000125785	-3.90037	26	41	0.00991612	2.00366
ACGAGU	9	4	0.405222	-0.392307	95	58	0.0876528	-1.05723	24	25	0.474193	0.324045
ACGAUA	3	0	0.254333	-0.594598	33	22	0.499367	-0.30158	16	16	0.600178	0.22172
ACGAUC	2	4	0.42464	0.371979	67	35	0.0288251	-1.54023	11	15	0.239388	0.620898
ACGAUG	3	2	1	0	128	90	0.276364	-0.558518	25	33	0.0866665	1.06215
ACGAUU	3	6	0.318207	0.49729	46	38	1	0	43	18	0.0141141	-1.85035
ACGCAA	5	8	0.282203	0.549438	63	38	0.134981	-0.869726	18	18	0.617832	0.209129
ACGCAC	18	9	0.246417	-0.608329	84	43	0.0122711	-1.91112	31	22	0.58492	-0.232904
ACGCAG	30	20	0.398426	-0.399653	129	93	0.345898	-0.461052	39	25	0.318848	-0.496416
ACGCAU	5	9	0.190961	0.719056	55	32	0.131722	-0.880343	22	17	0.873283	-0.058845
ACGCCA	21	11	0.215522	-0.666508	143	105	0.407005	-0.390401	29	35	0.166779	0.777857
ACGCCC	29	17	0.237921	-0.623568	160	95	0.011825	-1.9272	43	18	0.0141141	-1.85035
ACGCCG	49	15	0.000225981	-3.64593	127	55	5.13519e-05	-4.28944	10	3	0.162133	-0.790127
ACGCCU	15	24	0.0759098	1.1197	143	77	0.00279859	-2.55306	46	28	0.201104	-0.696578
ACGCGA	26	5	0.000846673	-3.07228	19	15	1	0	4	2	0.695447	-0.157736
ACGCGC	32	12	0.0146585	-1.83391	64	36	0.0708808	-1.14947	14	8	0.521743	-0.282543
ACGCGG	42	13	0.000652335	-3.18553	69	57	1	0	16	6	0.132061	-0.879227
ACGCGU	8	3	0.24137	-0.617317	23	13	0.317393	-0.498402	7	7	0.792231	0.101148
ACGCUA	2	3	0.667612	0.175476	35	33	0.626395	0.203152	19	9	0.186107	-0.730237
ACGCUC	20	13	0.487682	-0.311863	75	57	0.726587	-0.138712	22	14	0.504685	-0.29698
ACGCUG	27	16	0.284737	-0.545556	164	129	0.725056	-0.139628	45	43	0.522304	0.282077
ACGCUU	12	10	1	0	44	48	0.174875	0.757272	32	21	0.412233	-0.384857
ACGGAA	12	13	0.689147	0.161688	97	96	0.193918	0.712382	38	27	0.618639	-0.208563
ACGGAC	19	7	0.0511362	-1.29127	109	45	6.48403e-05	-4.18815	33	13	0.025292	-1.59702
ACGGAG	33	19	0.167541	-0.775878	162	131	0.906677	-0.0425476	41	24	0.212538	-0.672563
ACGGAU	5	7	0.564632	0.248235	76	54	0.429037	-0.367505	29	13	0.064038	-1.19356
ACGGCA	13	15	0.454179	0.342773	164	90	0.0019666	-2.70628	36	20	0.179212	-0.746633
ACGGCC	21	11	0.215522	-0.666508	191	112	0.00461458	-2.33587	39	19	0.0641901	-1.19253
ACGGCG	52	19	0.00115184	-2.93861	131	49	9.15131e-07	-6.03852	8	6	1	0
ACGGCU	19	17	1	0	164	88	0.00120717	-2.91823	27	26	0.679365	0.167897
ACGGGA	29	21	0.57378	-0.241254	118	102	0.734922	0.133759	44	22	0.062862	-1.20161
ACGGGC	23	13	0.245532	-0.609892	169	96	0.00368059	-2.43408	29	18	0.38048	-0.419668
ACGGGG	30	7	0.000772689	-3.112	124	82	0.141341	-0.849731	51	43	1	0
ACGGGU	7	5	0.782121	-0.106726	48	50	0.264294	0.577913	28	16	0.289179	-0.538833
ACGGUA	4	0	0.129337	-0.888278	29	21	0.77657	-0.109819	15	21	0.13306	0.875954
ACGGUC	12	8	0.65768	-0.181986	59	46	0.844743	-0.0732754	14	7	0.381179	-0.418871
ACGGUG	14	8	0.398617	-0.399445	131	93	0.313848	-0.50328	42	26	0.273307	-0.563349
ACGGUU	13	4	0.0864055	-1.06346	40	44	0.18926	0.722942	24	20	1	0
ACGUAA	4	1	0.3822	-0.417709	26	21	1	0	34	23	0.506765	-0.295193
ACGUAC	4	3	1	0	35	30	0.901133	0.0452113	25	19	0.87991	-0.0555616
ACGUAG	4	5	0.74126	0.130029	30	16	0.183253	-0.73695	23	23	0.55599	0.254933
ACGUAU	5	4	1	0	27	25	0.678169	0.168662	34	31	0.710646	0.148347
ACGUCA	10	2	0.0451458	-1.34538	104	74	0.366525	-0.435896	30	22	0.678819	-0.168246
ACGUCC	14	12	1	0	89	72	0.937071	-0.0282277	41	21	0.0745285	-1.12768
ACGUCG	14	5	0.106728	-0.971724	41	23	0.166887	-0.777577	10	7	0.81083	-0.09107
ACGUCU	11	5	0.317116	-0.498781	74	72	0.318856	0.496406	51	28	0.089628	-1.04756
ACGUGA	14	8	0.398617	-0.399445	104	88	0.884721	0.0531938	52	33	0.232873	-0.632881
ACGUGC	18	12	0.584285	-0.233375	131	88	0.153969	-0.812566	46	35	0.738542	-0.131625
ACGUGG	15	18	0.384322	0.415305	197	179	0.325402	0.48758	64	32	0.0183119	-1.73727
ACGUGU	10	5	0.439053	-0.357483	85	95	0.042907	1.36747	75	52	0.328167	-0.483905
ACGUUA	2	2	1	0	36	33	0.716974	0.144497	39	22	0.158183	-0.800841
ACGUUC	8	7	1	0	56	60	0.161944	0.790635	33	21	0.412447	-0.384632
ACGUUG	10	8	1	0	56	49	0.769134	0.113998	37	29	0.901761	-0.0449085
ACGUUU	7	8	0.613289	0.212335	51	52	0.277582	0.556608	80	48	0.0762008	-1.11804
ACUAAA	7	17	0.0223814	1.65011	138	97	0.265068	-0.576642	153	205	7.52e-06	5.12356
ACUAAC	4	11	0.0399533	1.39845	62	48	0.77474	-0.110844	68	85	0.011836	1.9268
ACUAAG	6	16	0.016973	1.77024	67	67	0.260091	0.584874	94	101	0.0725793	1.13919
ACUAAU	5	6	0.764192	0.116798	73	67	0.552354	0.257783	142	149	0.0518243	1.28547
ACUACA	15	18	0.384322	0.415305	239	210	0.477178	0.321319	123	148	0.00272599	2.56448
ACUACC	6	8	0.434747	0.361763	205	148	0.239601	-0.620511	69	71	0.23456	0.629745
ACUACG	7	3	0.357857	-0.44629	92	67	0.474013	-0.32421	15	12	1	0
ACUACU	7	17	0.0223814	1.65011	145	134	0.335976	0.473692	116	114	0.20864	0.680602
ACUAGA	8	8	0.805917	0.0937098	102	72	0.360685	-0.442872	95	121	0.00203393	2.69166
ACUAGC	11	5	0.317116	-0.498781	69	37	0.0400117	-1.39781	51	51	0.371441	0.43011
ACUAGG	12	8	0.65768	-0.181986	40	38	0.569845	0.244243	84	68	0.935111	-0.0291367
ACUAGU	5	6	0.764192	0.116798	57	40	0.476121	-0.322282	83	83	0.242695	0.61494
ACUAUA	6	6	1	0	78	78	0.22795	0.64216	112	120	0.0557675	1.25362
ACUAUC	5	8	0.282203	0.549438	86	88	0.14845	0.82842	59	65	0.125255	0.902206
ACUAUG	4	7	0.365556	0.437046	185	162	0.553335	0.257012	82	123	3.12e-05	4.5058
ACUAUU	4	9	0.161821	0.790964	104	106	0.127007	0.896173	207	187	0.418306	0.378506
ACUCAA	11	14	0.422953	0.373708	182	184	0.0517884	1.28577	132	160	0.00146144	2.83522
ACUCAC	14	21	0.126397	0.898265	189	170	0.396392	0.401875	112	110	0.225081	0.647661
ACUCAG	17	34	0.00449909	2.34688	310	300	0.0460667	1.33661	202	192	0.188355	0.725022
ACUCAU	8	13	0.18932	0.722804	143	137	0.207315	0.683369	144	140	0.190065	0.721099
ACUCCA	24	34	0.0651002	1.18642	351	288	1	0	193	194	0.0659157	1.18101
ACUCCC	24	27	0.399635	0.398336	295	164	5.26046e-05	-4.27898	184	115	0.0171508	-1.76572
ACUCCG	32	12	0.0146585	-1.83391	102	59	0.0324792	-1.48839	26	18	0.65025	-0.18692
ACUCCU	21	32	0.0526976	1.27821	297	221	0.270009	-0.568621	172	180	0.0321467	1.49286
ACUCGA	10	6	0.618431	-0.208709	70	40	0.0690005	-1.16115	24	21	0.881925	0.0545683
ACUCGC	27	12	0.0553398	-1.25696	94	53	0.0308946	-1.51012	23	17	0.753098	-0.123148
ACUCGG	23	17	0.751608	-0.124009	133	79	0.0227057	-1.64387	43	23	0.107338	-0.969248
ACUCGU	3	3	1	0	55	42	0.760179	-0.119084	27	15	0.21932	-0.658922
ACUCUA	11	12	0.676918	0.169464	96	134	6.56154e-05	4.18299	97	106	0.0567601	1.24596
ACUCUC	21	39	0.00410055	2.38716	197	156	0.748516	-0.125799	115	108	0.382055	0.417874
ACUCUG	29	44	0.0184664	1.73362	309	280	0.246213	0.608688	221	216	0.0926221	1.03329
ACUCUU	14	24	0.0494645	1.30571	166	161	0.133789	0.873581	210	176	0.959236	0.0180745
ACUGAA	21	42	0.00139761	2.85462	280	275	0.0365317	1.43733	262	235	0.392409	0.406262
ACUGAC	30	31	0.521418	0.282814	153	141	0.348381	0.457946	131	111	0.897347	0.0470395
ACUGAG	34	52	0.00915801	2.0382	238	208	0.536199	0.270674	198	184	0.280699	0.551759
ACUGAU	12	13	0.689147	0.161688	173	142	1	0	189	167	0.558761	0.252774
ACUGCA	21	39	0.00410055	2.38716	359	307	0.612746	0.21272	210	228	0.00533506	2.27286
ACUGCC	29	35	0.209594	0.678621	368	245	0.0117809	-1.92882	199	123	0.00996923	-2.00134
ACUGCG	30	10	0.00687458	-2.16275	133	96	0.352879	-0.452374	34	16	0.064741	-1.18882
ACUGCU	20	20	0.63809	0.195118	297	267	0.290171	0.537347	235	164	0.0875068	-1.05796
ACUGGA	36	41	0.252857	0.597126	394	597	1.23025e-21	20.91	208	206	0.0755872	1.12155
ACUGGC	31	27	1	0	314	232	0.228635	-0.640857	151	115	0.498572	-0.302272
ACUGGG	30	43	0.0341498	1.46661	244	278	0.00021337	3.67087	231	156	0.046465	-1.33287
ACUGGU	17	19	0.504502	0.297137	181	188	0.0244703	1.61136	177	115	0.0397906	-1.40022
ACUGUA	7	13	0.116187	0.934842	131	105	0.895961	-0.0477109	257	169	0.0193963	-1.71228
ACUGUC	13	21	0.0846748	1.07225	222	178	0.840761	-0.0753272	203	153	0.366137	-0.436356
ACUGUG	20	32	0.0359123	1.44476	387	410	0.000364287	3.43856	302	227	0.256547	-0.590834
ACUGUU	15	19	0.302923	0.518667	171	145	0.777739	0.109166	292	203	0.0522297	-1.28208
ACUUAA	11	16	0.182323	0.739159	113	115	0.110267	0.957553	230	176	0.425341	-0.371263
ACUUAC	8	8	0.805917	0.0937098	133	101	0.599291	-0.222362	97	108	0.0416536	1.38035
ACUUAG	11	14	0.422953	0.373708	63	68	0.135247	0.868873	141	107	0.523683	-0.280931
ACUUAU	3	11	0.0280735	1.5517	105	91	0.720058	0.142633	159	179	0.00530734	2.27512
ACUUCA	17	39	0.00043956	3.35698	367	331	0.223484	0.650754	211	174	0.959207	-0.0180879
ACUUCC	36	38	0.414847	0.382112	310	268	0.558415	0.253043	195	172	0.564676	0.248201
ACUUCG	17	10	0.440787	-0.355771	112	97	0.728346	0.137662	31	20	0.401862	-0.395923
ACUUCU	26	27	0.494591	0.305754	289	261	0.265529	0.575889	243	195	0.737034	-0.132513
ACUUGA	17	17	0.731836	0.135586	158	167	0.0256106	1.59158	244	185	0.357137	-0.447165
ACUUGC	14	18	0.289283	0.538678	145	132	0.398394	0.399687	171	127	0.352203	-0.453207
ACUUGG	26	24	0.8874	0.0518805	200	206	0.0246877	1.60752	213	159	0.322558	-0.491392
ACUUGU	10	24	0.00530874	2.27501	111	146	0.000203949	3.69048	240	178	0.25873	-0.587152
ACUUUA	10	15	0.228118	0.64184	133	115	0.702056	0.153628	260	256	0.0571485	1.24299
ACUUUC	18	28	0.0540536	1.26718	171	205	0.000275666	3.55962	207	199	0.148264	0.828964
ACUUUG	33	31	0.802239	0.0956965	291	298	0.00798967	2.09747	325	289	0.4175	0.379344
ACUUUU	38	44	0.184853	0.733173	168	191	0.00207972	2.682	546	399	0.0537773	-1.2694
AGAAAA	49	76	0.00117487	2.93001	827	731	0.146643	0.833739	624	689	2.77e-07	6.55751
AGAAAC	29	61	4.65439e-05	4.33214	475	534	6.45278e-07	6.19025	246	273	0.0010836	2.96513
AGAAAG	44	75	0.00029806	3.5257	581	523	0.130377	0.8848	345	364	0.00151582	2.81935
AGAAAU	24	32	0.108592	0.964201	414	470	1.51848e-06	5.81859	402	411	0.00307405	2.51229
AGAACA	24	39	0.0157243	1.80343	463	361	0.483762	-0.315368	232	253	0.00299265	2.52394
AGAACC	13	38	5.62136e-05	4.25016	324	270	0.869034	0.0609634	144	121	0.950831	0.0218965
AGAACG	21	9	0.0981715	-1.00801	181	104	0.00350086	-2.45583	36	32	0.808298	0.0924283
AGAACU	28	37	0.105064	0.978545	327	336	0.00434397	2.36211	227	167	0.244566	-0.611603
AGAAGA	59	94	0.000174813	3.75743	1103	846	0.138773	-0.857696	312	310	0.0266905	1.57364
AGAAGC	45	68	0.00330082	2.48138	692	498	0.0248467	-1.60473	188	212	0.00254093	2.59501
AGAAGG	61	60	0.466783	0.330885	624	524	0.721846	0.141555	271	226	0.964099	0.0158782
AGAAGU	22	37	0.0126963	1.89632	410	371	0.183258	0.736936	235	205	0.632098	0.199215
AGAAUA	10	21	0.0186828	1.72856	195	209	0.00798526	2.09771	233	268	0.000273646	3.56281
AGAAUC	16	16	0.724495	0.139965	258	224	0.55195	0.2581	143	175	0.00057814	3.23797
AGAAUG	17	15	1	0	352	420	2.16553e-07	6.66444	280	268	0.102909	0.987547
AGAAUU	15	32	0.00310499	2.50794	253	342	1.50429e-09	8.82267	290	345	6.36e-06	5.19632
AGACAA	19	31	0.0323964	1.4895	328	294	0.276822	0.5578	180	174	0.165062	0.782352
AGACAC	19	34	0.0123839	1.90714	277	263	0.0918324	1.037	165	145	0.648214	0.188282
AGACAG	33	45	0.0528078	1.2773	432	326	0.257825	-0.588675	193	215	0.00330425	2.48093
AGACAU	12	22	0.0379812	1.42043	268	293	0.000787117	3.10396	175	181	0.0429268	1.36727
AGACCA	20	26	0.183638	0.736038	360	295	1	0	195	173	0.530287	0.275489
AGACCC	38	46	0.125749	0.900494	332	248	0.277892	-0.556124	158	119	0.433164	-0.363347
AGACCG	16	11	0.700327	-0.154699	105	76	0.412298	-0.384789	33	19	0.21282	-0.671988
AGACCU	35	35	0.550237	0.25945	321	313	0.0311236	1.50691	183	136	0.3393	-0.469417
AGACGA	18	13	0.720079	-0.14262	116	78	0.193924	-0.712368	23	31	0.100075	0.999673
AGACGC	51	25	0.0212033	-1.6736	115	78	0.218696	-0.660159	34	16	0.064741	-1.18882
AGACGG	32	13	0.0240221	-1.61939	143	112	0.753098	-0.123148	49	50	0.314273	0.502693
AGACGU	10	17	0.0855982	1.06754	75	69	0.503911	0.297646	42	31	0.640117	-0.193741
AGACUA	10	14	0.306124	0.514103	126	129	0.0783801	1.10579	106	94	0.670256	0.173759
AGACUC	27	31	0.293188	0.532854	273	204	0.311798	-0.506126	147	132	0.547703	0.261455
AGACUG	30	44	0.0262291	1.58122	275	253	0.20461	0.689074	213	161	0.377546	-0.42303
AGACUU	18	35	0.00534229	2.27227	244	225	0.210542	0.676662	230	197	0.770631	0.113153
AGAGAA	54	87	0.000255986	3.59178	590	761	1.37893e-16	15.8605	354	400	2.51e-05	4.60006
AGAGAC	40	56	0.0184257	1.73458	324	297	0.170558	0.768129	170	157	0.345399	0.461679
AGAGAG	82	85	0.244205	0.612245	442	442	0.00362319	2.44091	302	236	0.488663	-0.310991
AGAGAU	14	43	1.22837e-05	4.91067	296	300	0.0106573	1.97235	183	213	0.000847057	3.07209
AGAGCA	26	47	0.00210801	2.67613	487	354	0.0831083	-1.08036	250	192	0.417156	-0.379702
AGAGCC	55	63	0.139176	0.856436	487	313	0.000726385	-3.13883	212	139	0.031881	-1.49647
AGAGCG	70	28	0.000505365	-3.2964	165	88	0.000988175	-3.00517	46	30	0.356813	-0.44756
AGAGCU	43	47	0.290313	0.537133	400	351	0.37875	0.421648	196	177	0.435466	0.361046
AGAGGA	68	89	0.0101766	1.9924	688	573	0.820848	0.0857375	256	220	0.7129	0.146971
AGAGGC	77	62	0.734091	-0.13425	383	327	0.623915	0.204875	193	162	0.957494	0.0188638
AGAGGG	64	73	0.103482	0.985137	261	234	0.342868	0.464873	220	179	0.840808	-0.075303
AGAGGU	27	36	0.0997461	1.0011	190	184	0.118907	0.924792	176	157	0.544934	0.263656
AGAGUA	14	16	0.467647	0.330082	146	132	0.433668	0.362843	139	128	0.424329	0.372297
AGAGUC	24	31	0.138377	0.858935	229	178	0.618429	-0.20871	113	118	0.0858121	1.06645
AGAGUG	31	30	0.700556	0.154557	285	247	0.542044	0.265966	188	156	1	0
AGAGUU	25	29	0.277904	0.556105	221	217	0.0612613	1.21281	204	170	1	0
AGAUAA	15	22	0.136867	0.863702	186	195	0.0178142	1.74923	181	188	0.0321022	1.49347
AGAUAC	11	8	0.820038	-0.0861662	136	152	0.00913855	2.03912	125	112	0.601799	0.220549
AGAUAG	11	13	0.540117	0.267512	122	121	0.15597	0.806958	92	104	0.0314857	1.50189
AGAUAU	5	14	0.0201633	1.69544	140	196	1.24181e-06	5.90594	180	197	0.00825036	2.08353
AGAUCA	10	20	0.0278397	1.55534	302	285	0.0969998	1.01323	115	150	0.000262194	3.58138
AGAUCC	16	31	0.00794266	2.10003	354	285	0.811581	-0.0906681	120	80	0.135905	-0.866765
AGAUCG	12	5	0.224411	-0.648957	121	99	1	0	27	43	0.00799783	2.09703
AGAUCU	17	29	0.0259423	1.58599	256	238	0.174948	0.757091	151	138	0.442516	0.354071
AGAUGA	11	21	0.03273	1.48505	598	453	0.203635	-0.691147	209	221	0.0134124	1.87249
AGAUGC	11	21	0.03273	1.48505	405	307	0.309144	-0.509839	157	147	0.300298	0.522447
AGAUGG	32	26	0.895575	-0.0478979	474	427	0.169786	0.770098	204	186	0.360393	0.443224
AGAUGU	16	18	0.492776	0.30735	292	296	0.0114067	1.94284	260	218	0.926836	0.032997
AGAUUA	10	16	0.16732	0.776451	118	126	0.0458868	1.33831	167	171	0.0558997	1.25259
AGAUUC	16	18	0.492776	0.30735	252	195	0.537107	-0.269939	146	138	0.283719	0.547112
AGAUUG	15	16	0.591583	0.227984	225	200	0.435445	0.361067	175	155	0.58047	0.23622
AGAUUU	18	37	0.00177896	2.74983	230	257	0.000736856	3.13262	366	316	0.617238	0.209548
AGCAAA	23	46	0.000669377	3.17433	456	323	0.0436946	-1.35957	278	271	0.0651688	1.18596
AGCAAC	28	36	0.131822	0.880013	441	251	2.97267e-06	-5.52685	123	107	0.740842	0.130274
AGCAAG	31	38	0.14835	0.828711	480	327	0.00975609	-2.01072	182	187	0.041504	1.38191
AGCAAU	8	24	0.00117573	2.92969	227	225	0.0470757	1.3272	167	169	0.0707703	1.15015
AGCACA	21	30	0.0909537	1.04118	425	248	1.64192e-05	-4.78465	201	186	0.307168	0.512624
AGCACC	41	32	0.72565	-0.139273	525	333	0.000208321	-3.68127	141	111	0.704382	-0.152192
AGCACG	18	8	0.12085	-0.917752	141	81	0.0102984	-1.98723	32	20	0.333176	-0.477327
AGCACU	15	33	0.00208406	2.68109	331	210	0.00329036	-2.48276	225	197	0.59107	0.228361
AGCAGA	44	57	0.045484	1.34214	651	471	0.0383448	-1.41629	247	191	0.471768	-0.326271
AGCAGC	123	116	0.475845	0.322534	1482	614	1.05199e-49	-48.978	244	190	0.530845	-0.275032
AGCAGG	50	51	0.424853	0.371761	578	380	0.000726761	-3.13861	238	179	0.325445	-0.487522
AGCAGU	30	35	0.262671	0.580588	510	351	0.0112167	-1.95013	221	172	0.543314	-0.264949
AGCAUA	4	4	1	0	122	87	0.33089	-0.480317	123	143	0.00665324	2.17697
AGCAUC	25	23	0.885174	0.0529713	350	270	0.443515	-0.353092	138	115	1	0
AGCAUG	7	12	0.16887	0.772448	299	224	0.312212	-0.505551	173	152	0.616528	0.210047
AGCAUU	12	21	0.0540621	1.26711	218	211	0.0896136	1.04763	251	246	0.0713833	1.1464
AGCCAA	41	42	0.442134	0.354446	399	310	0.473451	-0.324725	196	178	0.406061	0.391409
AGCCAC	37	53	0.0195241	1.70943	496	321	0.000831447	-3.08017	203	171	0.917295	0.0374911
AGCCAG	75	79	0.225225	0.647384	716	448	5.55441e-06	-5.25536	270	220	0.856009	-0.0675218
AGCCAU	21	30	0.0909537	1.04118	343	276	0.808634	-0.0922478	202	151	0.336243	-0.473346
AGCCCA	43	50	0.146698	0.833577	567	290	2.27728e-11	-10.6426	203	170	0.95854	0.0183897
AGCCCC	93	68	0.342856	-0.464888	747	327	1.17593e-22	-21.9296	265	136	3.6e-06	-5.44374
AGCCCG	97	49	0.00208511	-2.68087	290	146	1.04645e-06	-5.98028	59	21	0.00065689	-3.18251
AGCCCU	39	54	0.0223036	1.65162	496	340	0.0111143	-1.95412	240	171	0.13707	-0.863057
AGCCGA	37	28	0.709275	-0.149185	150	82	0.00292828	-2.53339	46	31	0.423309	-0.373342
AGCCGC	129	51	1.3189e-06	-5.87979	292	131	3.59263e-09	-8.44459	62	25	0.00170609	-2.768
AGCCGG	121	52	1.69809e-05	-4.77004	240	127	5.08569e-05	-4.29365	61	33	0.0489931	-1.30987
AGCCGU	25	19	0.763192	-0.117366	126	70	0.00958732	-2.0183	36	23	0.36127	-0.442168
AGCCUA	13	23	0.0435684	1.36083	148	117	0.805021	-0.0941929	103	100	0.290327	0.537112
AGCCUC	65	54	0.926783	-0.0330217	532	318	6.10575e-06	-5.21426	219	196	0.459734	0.337493
AGCCUG	61	65	0.245455	0.610028	643	434	0.00159625	-2.7969	305	246	0.764542	-0.116599
AGCCUU	30	38	0.11492	0.939604	347	335	0.0376069	1.42473	253	199	0.571113	-0.243278
AGCGAA	15	9	0.420945	-0.375774	121	70	0.0198841	-1.70149	30	17	0.241681	-0.616757
AGCGAC	29	15	0.130144	-0.885577	153	86	0.00508879	-2.29339	28	14	0.123822	-0.907203
AGCGAG	66	27	0.000819128	-3.08665	218	121	0.000468999	-3.32883	49	28	0.136295	-0.865521
AGCGAU	12	6	0.347105	-0.459539	77	73	0.412061	0.385039	23	22	0.65582	0.183215
AGCGCA	43	13	0.000658436	-3.18149	181	82	5.31331e-06	-5.27463	38	21	0.150543	-0.82234
AGCGCC	87	42	0.00190904	-2.71919	269	137	4.07346e-06	-5.39004	57	21	0.000919238	-3.03657
AGCGCG	80	19	2.50468e-08	-7.60125	98	34	6.33613e-06	-5.19818	12	3	0.0671522	-1.17294
AGCGCU	42	16	0.00524403	-2.28033	166	103	0.0272468	-1.56468	38	20	0.113185	-0.946211
AGCGGA	51	29	0.0919047	-1.03666	215	106	1.13672e-05	-4.94435	26	14	0.206504	-0.685071
AGCGGC	152	54	4.27257e-09	-8.36931	356	164	3.10914e-10	-9.50736	52	19	0.00175201	-2.75646
AGCGGG	78	37	0.00264149	-2.57815	238	117	4.04917e-06	-5.39263	49	21	0.0112407	-1.94921
AGCGGU	30	19	0.318831	-0.496439	67	66	0.297082	0.527123	26	16	0.357765	-0.446403
AGCGUA	4	0	0.129337	-0.888278	44	26	0.188716	-0.724192	22	16	0.746199	-0.127146
AGCGUC	17	12	0.710598	-0.148376	135	64	0.000260315	-3.5845	30	12	0.0301704	-1.52042
AGCGUG	33	19	0.167541	-0.775878	128	107	0.895872	0.0477541	52	40	0.754076	-0.122585
AGCGUU	13	4	0.0864055	-1.06346	59	32	0.0585142	-1.23274	51	33	0.274998	-0.560671
AGCUAA	7	12	0.16887	0.772448	108	86	0.885319	-0.0529005	126	143	0.0119094	1.92411
AGCUAC	14	20	0.168794	0.772643	241	171	0.151079	-0.820796	122	126	0.0970614	1.01295
AGCUAG	17	15	1	0	92	83	0.544096	0.264325	103	91	0.666137	0.176436
AGCUAU	8	21	0.00496717	2.30389	148	124	0.903038	0.044294	140	148	0.0440538	1.35602
AGCUCA	34	29	1	0	436	325	0.189788	-0.721731	176	151	0.781418	0.107117
AGCUCC	64	62	0.53194	0.274138	508	330	0.000960632	-3.01744	192	133	0.11861	-0.92588
AGCUCG	34	18	0.0970975	-1.01279	130	81	0.0527507	-1.27777	32	19	0.263131	-0.579829
AGCUCU	25	37	0.0408127	1.3892	401	359	0.243345	0.613778	251	185	0.229139	-0.639901
AGCUGA	47	31	0.258805	-0.587027	481	373	0.409376	-0.387878	183	192	0.0256165	1.59148
AGCUGC	94	68	0.305676	-0.514738	747	537	0.0198502	-1.70223	251	189	0.3149	-0.501827
AGCUGG	76	63	0.865141	-0.0629131	706	592	0.716836	0.14458	267	228	0.786506	0.104298
AGCUGU	31	43	0.0469396	1.32846	353	344	0.0246619	1.60797	320	205	0.00377303	-2.42331
AGCUUA	4	11	0.0399533	1.39845	114	100	0.63134	0.199737	135	99	0.358506	-0.445503
AGCUUC	33	51	0.00842836	2.07426	379	282	0.211249	-0.675206	170	153	0.502495	0.298868
AGCUUG	38	30	0.80809	-0.0925405	231	199	0.628152	0.201935	176	120	0.102037	-0.991243
AGCUUU	31	29	0.796124	0.0990194	254	269	0.00370603	2.43109	302	231	0.360926	-0.442582
AGGAAA	41	59	0.0118617	1.92585	592	520	0.264805	0.577074	421	414	0.0149412	1.82561
AGGAAC	24	33	0.0844481	1.07341	314	307	0.0324675	1.48855	160	150	0.304532	0.516367
AGGAAG	86	74	1	0	695	556	0.649439	-0.187462	318	262	0.933555	-0.0298603
AGGAAU	27	20	0.662581	-0.178761	259	313	4.36008e-06	5.36051	220	234	0.00944271	2.0249
AGGACA	26	37	0.0572369	1.24232	447	374	0.806054	0.0936358	201	192	0.171426	0.765923
AGGACC	30	38	0.11492	0.939604	364	321	0.356864	0.447497	142	90	0.0477482	-1.32104
AGGACG	23	26	0.390376	0.408517	195	120	0.0126994	-1.89622	48	24	0.0440207	-1.35634
AGGACU	28	35	0.164079	0.784946	304	275	0.259411	0.586012	218	162	0.302764	-0.518896
AGGAGA	59	79	0.010246	1.98945	695	599	0.386447	0.412911	276	276	0.0324385	1.48894
AGGAGC	101	85	0.941387	-0.0262318	666	472	0.0145327	-1.83765	196	135	0.097709	-1.01007
AGGAGG	139	117	0.900265	-0.0456296	877	547	3.99805e-07	-6.39815	301	230	0.359979	-0.443722
AGGAGU	34	31	0.805144	0.0941266	311	258	0.932854	0.0301864	161	162	0.0934608	1.02937
AGGAUA	10	14	0.306124	0.514103	167	129	0.640376	-0.193565	129	122	0.310916	0.507358
AGGAUC	21	27	0.192509	0.715548	221	179	0.91998	-0.0362217	114	95	1	0
AGGAUG	17	25	0.0899365	1.04606	420	384	0.127631	0.894044	178	173	0.147783	0.830375
AGGAUU	17	34	0.00449909	2.34688	199	219	0.00313785	2.50337	190	192	0.0572461	1.24225
AGGCAA	19	37	0.00305123	2.51552	205	251	2.16838e-05	4.66386	144	167	0.0036158	2.4418
AGGCAC	20	26	0.183638	0.736038	255	198	0.57116	-0.243242	153	128	0.952307	0.0212231
AGGCAG	69	73	0.238466	0.622573	451	370	1	0	317	278	0.510268	0.292201
AGGCAU	20	19	0.75135	0.124158	215	214	0.046734	1.33037	162	178	0.0104042	1.98279
AGGCCA	37	37	0.560412	0.251493	477	356	0.174562	-0.75805	222	177	0.68788	-0.162487
AGGCCC	94	35	1.19854e-05	-4.92135	524	317	1.66762e-05	-4.7779	204	121	0.00312285	-2.50545
AGGCCG	77	39	0.00677575	-2.16904	204	105	7.65756e-05	-4.11591	48	38	0.913839	-0.0391303
AGGCCU	33	44	0.0667337	1.17565	390	320	1	0	222	152	0.0690605	-1.16077
AGGCGA	35	18	0.0973337	-1.01174	85	67	0.870571	-0.0601956	32	16	0.110597	-0.956255
AGGCGC	77	40	0.00931008	-2.03105	143	78	0.00357704	-2.44648	41	19	0.0375414	-1.42549
AGGCGG	143	36	4.97487e-13	-12.3032	222	124	0.000530969	-3.27493	63	43	0.331035	-0.480126
AGGCGU	26	17	0.445355	-0.351293	78	45	0.0695195	-1.15789	37	41	0.212305	0.673039
AGGCUA	10	20	0.0278397	1.55534	117	101	0.733847	0.134394	99	101	0.155539	0.80816
AGGCUC	41	31	0.637315	-0.195646	299	205	0.0488097	-1.31149	144	127	0.626018	0.203413
AGGCUG	67	80	0.0472125	1.32594	467	378	0.862754	-0.064113	321	305	0.0996522	1.00151
AGGCUU	39	28	0.540456	-0.26724	215	204	0.140995	0.850798	204	136	0.0497681	-1.30305
AGGGAA	44	42	0.665776	0.176672	266	277	0.00575403	2.24003	289	262	0.304813	0.515966
AGGGAC	25	46	0.00184447	2.73413	224	190	0.767014	0.115197	181	125	0.120977	-0.917298
AGGGAG	100	91	0.716822	0.144588	311	264	0.706089	0.151141	310	226	0.140206	-0.853232
AGGGAU	19	15	0.864611	-0.063179	163	145	0.492353	0.307723	145	128	0.627102	0.202662
AGGGCA	42	39	0.739247	0.13121	311	218	0.0733525	-1.13458	237	153	0.0146438	-1.83435
AGGGCC	61	39	0.160691	-0.794008	382	253	0.00843034	-2.07415	190	109	0.00203538	-2.69135
AGGGCG	68	41	0.083353	-1.07908	150	78	0.00106501	-2.97265	64	26	0.00196777	-2.70603
AGGGCU	39	53	0.0358885	1.44504	268	228	0.718137	0.143793	225	164	0.221548	-0.654532
AGGGGA	65	45	0.293072	-0.533025	263	231	0.469485	0.328379	234	160	0.0610742	-1.21414
AGGGGC	92	38	9.51291e-05	-4.02169	301	173	0.000178513	-3.74833	191	148	0.548613	-0.260734
AGGGGG	86	47	0.0145493	-1.83716	220	141	0.0228364	-1.64137	223	112	1.04e-05	-4.98428
AGGGGU	35	24	0.434744	-0.361766	127	116	0.439227	0.357311	178	101	0.0021218	-2.6733
AGGGUA	13	14	0.56885	0.245002	68	53	0.785008	-0.105126	116	94	0.889861	-0.0506779
AGGGUC	17	26	0.0669158	1.17447	163	144	0.528547	0.276916	152	96	0.0353939	-1.45107
AGGGUG	40	30	0.632229	-0.199126	159	162	0.0564257	1.24852	214	154	0.190453	-0.720212
AGGGUU	14	22	0.0934986	1.02919	101	96	0.316577	0.499521	178	100	0.00169186	-2.77164
AGGUAA	5	14	0.0201633	1.69544	61	79	0.00826531	2.08274	115	136	0.00525559	2.27938
AGGUAC	8	7	1	0	94	85	0.54815	0.261101	95	69	0.433038	-0.363474
AGGUAG	13	15	0.454179	0.342773	77	73	0.412061	0.385039	135	104	0.603348	-0.219432
AGGUAU	4	8	0.245974	0.609111	87	84	0.317803	0.497842	118	95	0.836726	-0.0774165
AGGUCA	18	29	0.0398217	1.39988	220	220	0.039408	1.40442	141	134	0.275809	0.559391
AGGUCC	30	29	0.69606	0.157353	187	156	0.913604	0.0392422	97	86	0.656958	0.182463
AGGUCG	13	10	0.837272	-0.0771334	48	39	1	0	32	15	0.0779949	-1.10793
AGGUCU	20	36	0.00717688	2.14406	163	160	0.117315	0.930647	129	109	0.89661	0.0473966
AGGUGA	21	39	0.00410055	2.38716	296	268	0.253291	0.59638	183	141	0.539395	-0.268093
AGGUGC	26	40	0.0254931	1.59358	280	236	0.790693	0.101992	197	113	0.00166544	-2.77847
AGGUGG	46	50	0.26104	0.583292	470	350	0.17108	-0.766801	240	202	0.923886	0.0343816
AGGUGU	15	16	0.591583	0.227984	198	188	0.167159	0.77687	186	139	0.372714	-0.428624
AGGUUA	6	9	0.310629	0.507758	93	81	0.70392	0.152477	134	117	0.704015	0.152418
AGGUUC	13	24	0.0307543	1.51209	154	134	0.635984	0.196554	127	103	0.894689	-0.0483277
AGGUUG	22	22	0.651842	0.185858	141	120	0.803584	0.094969	156	155	0.123981	0.906644
AGGUUU	13	29	0.00313148	2.50425	159	147	0.301691	0.520437	277	192	0.057122	-1.2432
AGUAAA	11	20	0.0473587	1.3246	172	145	0.82158	0.0853503	235	249	0.00803362	2.09509
AGUAAC	10	13	0.403802	0.393832	107	68	0.110428	-0.956922	111	95	0.834073	0.0787957
AGUAAG	14	18	0.289283	0.538678	103	93	0.518833	0.284972	126	148	0.00430843	2.36568
AGUAAU	6	5	1	0	121	82	0.181105	-0.742069	171	204	0.000497148	3.30351
AGUACA	6	7	0.592154	0.227565	216	191	0.455453	0.341556	117	117	0.167895	0.774962
AGUACC	11	8	0.820038	-0.0861662	234	157	0.0533476	-1.27288	93	79	0.938984	0.0273418
AGUACG	7	3	0.357857	-0.44629	76	57	0.663253	-0.178321	13	7	0.379471	-0.420821
AGUACU	8	14	0.133432	0.874738	160	127	0.812514	-0.0901689	138	125	0.496061	0.304465
AGUAGA	7	17	0.0223814	1.65011	151	77	0.000655485	-3.18344	147	152	0.06293	1.20114
AGUAGC	15	18	0.384322	0.415305	135	71	0.00252111	-2.59841	122	114	0.395404	0.402959
AGUAGG	11	15	0.246043	0.60899	61	47	0.772414	-0.11215	123	99	0.839928	-0.0757579
AGUAGU	12	2	0.0164776	-1.78311	102	48	0.00130768	-2.8835	121	95	0.732663	-0.135096
AGUAUA	4	9	0.161821	0.790964	94	86	0.500403	0.30068	162	181	0.00662126	2.17906
AGUAUC	6	8	0.434747	0.361763	137	109	0.847641	-0.0717882	102	98	0.320316	0.494421
AGUAUG	2	14	0.00151111	2.8207	173	152	0.540419	0.267269	147	122	1	0
AGUAUU	9	18	0.035035	1.4555	127	140	0.0164484	1.78388	260	219	0.890546	0.0503437
AGUCAA	7	22	0.0013741	2.86198	218	197	0.348614	0.457656	98	146	6.11e-06	5.21398
AGUCAC	16	24	0.0833105	1.0793	226	181	0.842089	-0.0746421	138	124	0.535362	0.271353
AGUCAG	27	32	0.240522	0.618845	312	219	0.0809659	-1.0917	156	135	0.768507	0.114352
AGUCAU	10	13	0.403802	0.393832	182	170	0.238668	0.622207	149	147	0.144535	0.840027
AGUCCA	25	30	0.225735	0.646402	296	227	0.455128	-0.341867	132	96	0.351765	-0.453747
AGUCCC	36	30	1	0	290	168	0.000291967	-3.53467	136	104	0.559701	-0.252044
AGUCCG	34	7	0.000122822	-3.91072	73	56	0.724161	-0.140165	16	14	1	0
AGUCCU	26	19	0.655101	-0.183692	302	209	0.0617603	-1.20929	188	141	0.375802	-0.425041
AGUCGA	12	4	0.130607	-0.884032	64	51	0.925445	-0.0336495	25	13	0.19357	-0.713163
AGUCGC	31	9	0.00238968	-2.62166	69	55	0.928164	-0.0323755	18	9	0.248338	-0.604957
AGUCGG	39	11	0.000543969	-3.26443	113	66	0.0292281	-1.5342	31	17	0.192526	-0.715512
AGUCGU	11	1	0.0080634	-2.09348	56	30	0.0651158	-1.18631	33	12	0.0156235	-1.80622
AGUCUA	6	16	0.016973	1.77024	92	79	0.817756	0.0873765	105	83	0.769739	-0.113657
AGUCUC	30	27	0.894777	0.0482854	266	153	0.000399912	-3.39804	131	134	0.09569	1.01913
AGUCUG	37	31	1	0	264	207	0.643395	-0.191522	179	146	0.911298	-0.0403396
AGUCUU	17	33	0.00648468	2.18811	186	147	0.741374	-0.129962	216	195	0.400137	0.397791
AGUGAA	27	29	0.423438	0.37321	384	289	0.278011	-0.555938	249	219	0.546312	0.262559
AGUGAC	35	27	0.704073	-0.152382	258	228	0.438383	0.358146	150	135	0.513118	0.289783
AGUGAG	33	28	1	0	267	267	0.0236819	1.62558	218	203	0.260148	0.584779
AGUGAU	13	26	0.0148909	1.82708	248	228	0.231021	0.636348	161	153	0.23448	0.629894
AGUGCA	33	23	0.503492	-0.298008	284	254	0.340467	0.467925	185	154	1	0
AGUGCC	33	31	0.802239	0.0956965	411	266	0.00256286	-2.59128	174	122	0.161167	-0.792723
AGUGCG	26	13	0.111429	-0.953003	107	67	0.0934515	-1.02941	34	22	0.421172	-0.37554
AGUGCU	21	18	1	0	264	248	0.131099	0.882402	247	175	0.117542	-0.929806
AGUGGA	34	32	0.713096	0.146852	418	405	0.0188525	1.72463	196	166	0.874218	0.0583802
AGUGGC	44	42	0.665776	0.176672	361	276	0.381157	-0.418897	198	152	0.485368	-0.313929
AGUGGG	42	38	0.823467	0.084354	317	278	0.433822	0.362689	217	162	0.326937	-0.485537
AGUGGU	21	24	0.371279	0.4303	243	233	0.0971657	1.01249	178	141	0.694049	-0.15861
AGUGUA	7	11	0.240941	0.61809	103	140	0.000102403	3.98969	169	127	0.413932	-0.383071
AGUGUC	20	20	0.63809	0.195118	241	187	0.593149	-0.226836	166	126	0.480653	-0.318168
AGUGUG	21	28	0.151406	0.819856	314	376	7.53792e-07	6.12275	274	183	0.0240046	-1.6197
AGUGUU	20	21	0.534758	0.271843	183	175	0.151812	0.818695	287	242	0.861464	0.0647628
AGUUAA	7	17	0.0223814	1.65011	126	96	0.590266	-0.228952	198	195	0.0945626	1.02428
AGUUAC	7	11	0.240941	0.61809	152	111	0.353397	-0.451737	135	132	0.196717	0.706158
AGUUAG	2	9	0.0295031	1.53013	86	53	0.105562	-0.976491	121	115	0.326747	0.485788
AGUUAU	6	11	0.147812	0.830289	104	120	0.0128032	1.89268	191	164	0.789858	0.102451
AGUUCA	16	21	0.248184	0.605226	261	298	0.000106338	3.97331	189	203	0.0111733	1.95182
AGUUCC	30	20	0.398426	-0.399653	325	258	0.708007	-0.149962	160	114	0.224961	-0.647893
AGUUCG	15	4	0.036335	-1.43967	100	60	0.0565935	-1.24723	23	26	0.316023	0.500281
AGUUCU	18	32	0.0151044	1.8209	296	230	0.539809	-0.26776	225	217	0.126191	0.898971
AGUUGA	16	24	0.0833105	1.0793	169	148	0.572882	0.241935	201	147	0.258172	-0.588092
AGUUGC	21	26	0.242255	0.615727	158	147	0.274979	0.5607	137	88	0.0609258	-1.2152
AGUUGG	29	33	0.308344	0.510965	206	162	0.713905	-0.14636	204	136	0.0497681	-1.30305
AGUUGU	14	14	0.708487	0.149668	164	128	0.680963	-0.166877	240	145	0.0024857	-2.60455
AGUUUA	9	11	0.50392	0.297638	148	133	0.47203	0.32603	248	219	0.51549	0.28778
AGUUUC	23	26	0.390376	0.408517	215	217	0.0333314	1.47715	219	234	0.00815152	2.08876
AGUUUG	34	26	0.698962	-0.155547	259	238	0.223499	0.650725	290	211	0.150949	-0.82117
AGUUUU	26	40	0.0254931	1.59358	179	201	0.00233307	2.63207	474	358	0.174554	-0.758071
AUAAAA	26	37	0.0572369	1.24232	235	214	0.275686	0.559585	587	601	0.000332672	3.47798
AUAAAC	12	10	1	0	125	87	0.241457	-0.61716	226	215	0.165336	0.781633
AUAAAG	13	26	0.0148909	1.82708	225	193	0.658524	0.181428	278	302	0.00130372	2.88482
AUAAAU	12	25	0.0123763	1.90741	136	194	7.31237e-07	6.13594	444	480	6.26e-05	4.20333
AUAACA	14	12	1	0	126	110	0.647474	0.188778	151	180	0.00110086	2.95827
AUAACC	5	7	0.564632	0.248235	75	84	0.0555661	1.25519	91	97	0.0920809	1.03583
AUAACG	6	1	0.132582	-0.877516	20	29	0.0609835	1.21479	26	25	0.673623	0.171583
AUAACU	4	16	0.00280863	2.55151	99	91	0.466135	0.331488	156	179	0.00356936	2.44741
AUAAGA	6	18	0.00653717	2.18461	138	152	0.0131149	1.88223	147	160	0.0186999	1.72816
AUAAGC	6	7	0.592154	0.227565	99	80	0.940231	-0.0267653	102	103	0.182438	0.738884
AUAAGG	12	10	1	0	102	110	0.0530548	1.27528	95	129	0.000275092	3.56052
AUAAGU	4	13	0.0143212	1.84402	74	77	0.164255	0.784481	137	147	0.0319054	1.49614
AUAAUA	12	9	0.82921	-0.0813353	110	101	0.446766	0.34992	268	333	9.99e-07	6.00064
AUAAUC	8	6	1	0	85	79	0.433638	0.362873	113	162	8.7e-06	5.06042
AUAAUG	5	11	0.0818435	1.08702	144	169	0.00174513	2.75817	218	228	0.0152647	1.81631
AUAAUU	9	24	0.00259598	2.5857	110	135	0.00199656	2.69972	318	367	1.96e-05	4.70803
AUACAA	6	18	0.00653717	2.18461	155	190	0.000224741	3.64832	179	216	0.000218699	3.66015
AUACAC	3	13	0.00531825	2.27423	108	105	0.2417	0.616723	109	106	0.273046	0.563764
AUACAG	7	11	0.240941	0.61809	189	181	0.143602	0.842838	160	177	0.00862373	2.0643
AUACAU	5	11	0.0818435	1.08702	102	113	0.0283872	1.54688	203	227	0.00224255	2.64926
AUACCA	7	15	0.0524013	1.28066	172	164	0.170978	0.767059	131	124	0.314349	0.502587
AUACCC	11	6	0.468346	-0.329433	119	87	0.441373	-0.355195	62	69	0.0960637	1.01744
AUACCG	3	3	1	0	39	44	0.152803	0.815869	15	7	0.28421	-0.546361
AUACCU	5	4	1	0	135	140	0.060095	1.22116	135	121	0.572213	0.242442
AUACGA	2	4	0.42464	0.371979	49	39	0.915037	-0.0385614	19	22	0.346883	0.459817
AUACGC	3	4	0.710841	0.148228	22	24	0.375056	0.425903	9	15	0.103242	0.986142
AUACGG	5	3	0.732826	-0.134999	31	46	0.0114232	1.94221	22	13	0.396949	-0.401265
AUACGU	3	2	1	0	30	27	0.790526	0.102084	43	36	1	0
AUACUA	3	9	0.077986	1.10798	75	59	0.862278	-0.0643525	107	139	0.00052198	3.28235
AUACUC	6	5	1	0	105	89	0.829018	0.0814359	99	112	0.0267923	1.57199
AUACUG	11	10	1	0	114	258	4.84505e-21	20.3147	210	169	0.796468	-0.0988318
AUACUU	12	12	0.838368	0.0765654	89	108	0.00645288	2.19025	257	213	1	0
AUAGAA	10	10	0.823958	0.0840949	152	165	0.0130172	1.88548	214	222	0.0209151	1.67954
AUAGAC	5	12	0.0520981	1.28318	79	92	0.0255796	1.59211	86	81	0.437443	0.359079
AUAGAG	12	19	0.105691	0.975962	98	116	0.00888573	2.05131	132	121	0.448907	0.347843
AUAGAU	7	10	0.336794	0.472635	90	75	0.937765	0.0279062	149	146	0.160682	0.794032
AUAGCA	6	11	0.147812	0.830289	134	105	0.745411	-0.127604	141	153	0.0223529	1.65067
AUAGCC	6	10	0.216617	0.664307	71	76	0.115358	0.937951	84	70	1	0
AUAGCG	1	2	0.598818	0.222705	31	15	0.103155	-0.986509	20	10	0.203538	-0.691355
AUAGCU	4	14	0.00840895	2.07526	98	86	0.657401	0.18217	131	110	0.948472	0.0229754
AUAGGA	10	8	1	0	79	80	0.202272	0.694064	132	122	0.412847	0.384211
AUAGGC	6	9	0.310629	0.507758	50	45	0.680787	0.166989	70	68	0.392686	0.405954
AUAGGG	7	13	0.116187	0.934842	43	39	0.658803	0.181245	76	60	0.79656	-0.0987818
AUAGGU	2	5	0.260501	0.584191	45	19	0.0163445	-1.78663	92	104	0.0314857	1.50189
AUAGUA	4	7	0.365556	0.437046	82	60	0.55513	-0.255605	133	134	0.124254	0.905689
AUAGUC	6	10	0.216617	0.664307	54	41	0.757503	-0.120615	77	86	0.0593822	1.22634
AUAGUG	8	8	0.805917	0.0937098	102	76	0.547278	-0.261792	139	119	0.851239	0.0699486
AUAGUU	5	8	0.282203	0.549438	73	68	0.498526	0.302312	186	189	0.0548508	1.26082
AUAUAA	5	14	0.0201633	1.69544	88	146	1.161e-07	6.93517	299	328	0.000550249	3.25944
AUAUAC	7	6	1	0	65	77	0.0346386	1.46044	193	157	0.872105	-0.0594315
AUAUAG	2	10	0.0165225	1.78192	51	61	0.057057	1.24369	157	146	0.327296	0.485059
AUAUAU	2	33	1.92462e-09	8.71566	56	95	1.23298e-05	4.90904	724	479	0.000102505	-3.98925
AUAUCA	8	10	0.483152	0.315916	159	188	0.000799192	3.09735	131	173	6.58e-05	4.18173
AUAUCC	6	15	0.02691	1.57009	101	123	0.00379022	2.42134	102	102	0.205482	0.687227
AUAUCG	1	0	1	0	49	31	0.263603	-0.579049	24	14	0.330482	-0.480852
AUAUCU	4	12	0.0240892	1.61818	93	121	0.000933029	3.0301	160	197	0.000234598	3.62968
AUAUGA	8	8	0.805917	0.0937098	163	182	0.00483257	2.31582	159	198	0.000153235	3.81464
AUAUGC	3	9	0.077986	1.10798	122	128	0.0564388	1.24842	125	141	0.0136552	1.8647
AUAUGG	7	8	0.613289	0.212335	148	149	0.0803934	1.09478	114	132	0.0102945	1.98739
AUAUGU	2	13	0.00276994	2.55753	98	133	0.000154675	3.81058	289	291	0.0217228	1.66308
AUAUUA	5	14	0.0201633	1.69544	100	110	0.0373106	1.42817	279	289	0.00893005	2.04915
AUAUUC	13	12	1	0	113	165	2.23203e-06	5.6513	177	196	0.00579751	2.23676
AUAUUG	17	10	0.440787	-0.355771	162	164	0.0586497	1.23173	232	200	0.699389	0.155281
AUAUUU	12	20	0.076062	1.11883	153	177	0.00192344	2.71592	707	603	0.637042	0.195832
AUCAAA	8	18	0.0284622	1.54573	283	270	0.079757	1.09823	176	254	1.57e-08	7.80328
AUCAAC	9	11	0.50392	0.297638	210	263	5.50676e-06	5.2591	81	85	0.138794	0.857628
AUCAAG	11	19	0.0677037	1.16939	373	304	0.938444	-0.0275918	117	145	0.0015036	2.82287
AUCAAU	3	13	0.00531825	2.27423	122	179	7.18351e-07	6.14366	104	133	0.00106504	2.97263
AUCACA	10	16	0.16732	0.776451	247	246	0.0333501	1.4769	144	156	0.0235819	1.62742
AUCACC	17	23	0.157115	0.803781	301	272	0.257109	0.589883	103	107	0.11096	0.954834
AUCACG	8	2	0.119529	-0.922527	79	79	0.230606	0.637129	31	28	0.794315	0.100007
AUCACU	8	17	0.042691	1.36966	178	166	0.255152	0.593201	167	166	0.110311	0.957382
AUCAGA	12	17	0.195901	0.707963	345	369	0.000460528	3.33674	153	189	0.000264775	3.57712
AUCAGC	19	23	0.281785	0.550082	377	267	0.0684099	-1.16488	117	118	0.14935	0.825796
AUCAGG	15	30	0.0067425	2.17118	221	213	0.100898	0.996116	135	129	0.26605	0.575037
AUCAGU	4	16	0.00280863	2.55151	240	223	0.190995	0.718977	186	178	0.188086	0.725643
AUCAUA	2	6	0.155442	0.80843	89	107	0.00787165	2.10393	118	138	0.00685402	2.16405
AUCAUC	11	18	0.0955431	1.0198	297	289	0.0418592	1.37821	112	119	0.0642698	1.19199
AUCAUG	8	11	0.360908	0.442603	211	225	0.00696944	2.1568	147	173	0.00197881	2.7036
AUCAUU	10	18	0.0596453	1.22442	182	186	0.0361839	1.44148	186	218	0.000555494	3.25532
AUCCAA	14	12	1	0	226	251	0.00106702	2.97183	125	141	0.0136552	1.8647
AUCCAC	11	24	0.0101308	1.99436	221	201	0.304372	0.516595	107	105	0.240977	0.618025
AUCCAG	21	31	0.0695309	1.15782	451	390	0.466751	0.330915	156	137	0.639219	0.19435
AUCCAU	16	15	0.858136	0.0664438	166	196	0.000582895	3.23441	120	136	0.014228	1.84686
AUCCCA	23	32	0.0795943	1.09912	294	227	0.509021	-0.293264	169	189	0.00569485	2.24452
AUCCCC	36	20	0.139947	-0.854036	257	161	0.00684597	-2.16456	145	101	0.17911	-0.74688
AUCCCG	29	13	0.0620716	-1.20711	129	50	2.709e-06	-5.56719	26	23	0.886265	0.0524363
AUCCCU	19	27	0.103664	0.984374	226	181	0.842089	-0.0746421	152	135	0.593782	0.226373
AUCCGA	7	12	0.16887	0.772448	84	68	1	0	15	18	0.299842	0.523108
AUCCGC	24	13	0.190689	-0.719673	122	59	0.000737352	-3.13233	15	8	0.403183	-0.394498
AUCCGG	18	13	0.720079	-0.14262	105	78	0.552437	-0.257717	25	12	0.137261	-0.862454
AUCCGU	10	6	0.618431	-0.208709	65	54	1	0	32	18	0.202673	-0.693205
AUCCUA	12	17	0.195901	0.707963	126	132	0.0524375	1.28036	113	131	0.0100114	1.99951
AUCCUC	21	27	0.192509	0.715548	325	243	0.273186	-0.563542	120	139	0.00863504	2.06374
AUCCUG	18	27	0.0726726	1.13863	434	399	0.109111	0.962132	194	163	0.915441	0.0383698
AUCCUU	13	15	0.454179	0.342773	192	206	0.00872123	2.05942	189	172	0.397858	0.400272
AUCGAA	7	5	0.782121	-0.106726	83	60	0.501564	-0.299674	26	11	0.0685027	-1.16429
AUCGAC	3	3	1	0	97	105	0.0559973	1.25183	12	10	1	0
AUCGAG	12	3	0.0663407	-1.17822	152	113	0.458885	-0.338296	33	19	0.21282	-0.671988
AUCGAU	1	5	0.101903	0.991811	42	63	0.00229745	2.63875	21	12	0.382435	-0.417442
AUCGCA	12	4	0.130607	-0.884032	58	56	0.39815	0.399954	18	24	0.162316	0.789638
AUCGCC	13	12	1	0	128	90	0.276364	-0.558518	20	18	0.871112	0.0599259
AUCGCG	13	7	0.374124	-0.426985	36	25	0.607174	-0.216687	5	7	0.398339	0.399747
AUCGCU	8	2	0.119529	-0.922527	63	70	0.0819974	1.0862	25	31	0.141413	0.849511
AUCGGA	17	5	0.0316655	-1.49941	79	55	0.385502	-0.413974	16	22	0.142651	0.845726
AUCGGC	13	8	0.516811	-0.286668	96	77	0.939129	-0.0272748	18	9	0.248338	-0.604957
AUCGGG	13	5	0.155984	-0.806921	83	66	0.869523	-0.0607188	21	9	0.100759	-0.996716
AUCGGU	4	5	0.74126	0.130029	48	28	0.166866	-0.777632	21	6	0.0190178	-1.72084
AUCGUA	2	3	0.667612	0.175476	27	31	0.234978	0.628972	17	24	0.115812	0.936245
AUCGUC	6	4	0.760933	-0.118654	94	70	0.582978	-0.234348	18	20	0.416682	0.380195
AUCGUG	9	3	0.159918	-0.796104	112	102	0.450789	0.346027	38	30	0.90328	-0.0441774
AUCGUU	12	4	0.130607	-0.884032	39	51	0.0335824	1.47389	34	22	0.421172	-0.37554
AUCUAA	4	9	0.161821	0.790964	94	77	1	0	129	142	0.0237951	1.62351
AUCUAC	9	11	0.50392	0.297638	166	160	0.148297	0.828867	64	89	0.00193323	2.71372
AUCUAG	7	7	0.795029	0.0996171	71	53	0.652102	-0.185684	104	90	0.773631	0.111466
AUCUAU	5	8	0.282203	0.549438	96	126	0.000555847	3.25504	148	162	0.0164651	1.78344
AUCUCA	12	14	0.440069	0.356479	248	221	0.378313	0.422149	172	211	0.000141824	3.84825
AUCUCC	21	32	0.0526976	1.27821	299	245	1	0	169	130	0.523283	-0.281263
AUCUCG	11	5	0.317116	-0.498781	70	43	0.155904	-0.807143	28	28	0.504634	0.297024
AUCUCU	21	25	0.30159	0.520582	197	203	0.02373	1.6247	204	214	0.0182782	1.73807
AUCUGA	16	25	0.0613522	1.21217	225	180	0.803049	-0.095258	178	156	0.660227	0.180307
AUCUGC	27	19	0.555997	-0.254928	271	262	0.0612227	1.21309	173	150	0.737432	0.132278
AUCUGG	19	21	0.432799	0.363714	293	265	0.268624	0.570855	162	147	0.45773	0.339391
AUCUGU	11	12	0.676918	0.169464	190	174	0.316928	0.499039	258	229	0.466831	0.33084
AUCUUA	10	12	0.522824	0.281645	83	117	0.000155332	3.80874	153	197	5.31e-05	4.27519
AUCUUC	18	31	0.0210408	1.67694	314	263	0.834319	0.0786677	177	169	0.195508	0.708836
AUCUUG	18	24	0.165922	0.780095	134	173	9.0305e-05	4.04429	208	161	0.530421	-0.275379
AUCUUU	22	19	1	0	196	235	0.000103001	3.98716	359	306	0.755365	0.121843
AUGAAA	15	22	0.136867	0.863702	420	448	0.000130206	3.88537	326	395	4.97e-07	6.30407
AUGAAC	5	15	0.0123001	1.91009	297	242	0.965476	-0.0152586	144	136	0.307513	0.512137
AUGAAG	19	18	0.86934	0.0608104	608	537	0.223258	0.651193	220	225	0.0285284	1.54472
AUGAAU	10	18	0.0596453	1.22442	255	362	1.43342e-11	10.8436	235	268	0.000395585	3.40276
AUGACA	9	15	0.150512	0.82243	322	344	0.000696643	3.15699	160	191	0.000716991	3.14449
AUGACC	7	11	0.240941	0.61809	289	222	0.476933	-0.321542	93	93	0.211167	0.675373
AUGACG	7	2	0.191027	-0.718904	107	84	0.77168	-0.112562	24	20	1	0
AUGACU	7	12	0.16887	0.772448	222	221	0.0448549	1.34819	146	193	2.46e-05	4.60867
AUGAGA	16	21	0.248184	0.605226	309	320	0.0038789	2.41129	197	207	0.0187987	1.72587
AUGAGC	12	18	0.144919	0.838874	282	228	0.893811	-0.0487542	113	103	0.495339	0.305097
AUGAGG	15	21	0.18064	0.743186	342	282	0.96792	0.0141606	168	164	0.151712	0.81898
AUGAGU	8	4	0.404274	-0.393324	158	221	2.78069e-07	6.55585	131	147	0.0133964	1.87301
AUGAUA	6	9	0.310629	0.507758	174	153	0.541439	0.266451	144	156	0.0235819	1.62742
AUGAUC	6	16	0.016973	1.77024	197	185	0.198666	0.701877	110	97	0.675859	0.170144
AUGAUG	10	16	0.16732	0.776451	514	411	0.691839	-0.159995	179	175	0.13488	0.870054
AUGAUU	8	12	0.263933	0.578506	196	196	0.0536893	1.27011	211	233	0.00307724	2.51184
AUGCAA	8	11	0.360908	0.442603	225	231	0.0185251	1.73224	208	194	0.249533	0.602872
AUGCAC	8	13	0.18932	0.722804	208	166	0.795223	-0.0995109	132	121	0.448907	0.347843
AUGCAG	11	23	0.0151265	1.82026	482	359	0.165699	-0.78068	217	182	0.959902	0.017773
AUGCAU	3	15	0.00162928	2.78801	155	167	0.0159335	1.79769	181	188	0.0321022	1.49347
AUGCCA	7	15	0.0524013	1.28066	416	317	0.334438	-0.475684	163	176	0.0163377	1.78681
AUGCCC	19	11	0.361036	-0.44245	308	227	0.223867	-0.65001	120	105	0.737863	0.132024
AUGCCG	4	7	0.365556	0.437046	114	58	0.00273736	-2.56267	36	20	0.179212	-0.746633
AUGCCU	12	26	0.00836113	2.07774	268	233	0.529844	0.275852	198	199	0.0620343	1.20737
AUGCGA	5	7	0.564632	0.248235	60	52	0.776689	0.109753	22	18	1	0
AUGCGC	11	7	0.639433	-0.194205	77	47	0.124706	-0.904114	19	9	0.186107	-0.730237
AUGCGG	16	4	0.0231755	-1.63497	94	81	0.761671	0.118232	32	22	0.585017	-0.232831
AUGCGU	6	3	0.519087	-0.284759	42	26	0.274564	-0.561356	48	21	0.0150413	-1.82272
AUGCUA	2	8	0.0521048	1.28312	123	115	0.328832	0.483026	110	118	0.0539531	1.26798
AUGCUC	14	15	0.580521	0.236182	182	169	0.260079	0.584895	109	123	0.0209046	1.67976
AUGCUG	15	25	0.0403363	1.3943	485	417	0.503314	0.298161	225	200	0.495389	0.305054
AUGCUU	13	13	0.699748	0.155058	191	193	0.0453707	1.34322	192	192	0.0727559	1.13813
AUGGAA	8	26	0.00043249	3.36402	385	431	1.0518e-05	4.97807	297	281	0.122122	0.913207
AUGGAC	8	10	0.483152	0.315916	326	259	0.708527	-0.149644	133	113	0.898126	0.0466627
AUGGAG	30	26	1	0	552	498	0.128592	0.890786	213	189	0.515207	0.288018
AUGGAU	11	23	0.0151265	1.82026	268	260	0.059908	1.22252	159	165	0.0506411	1.2955
AUGGCA	11	12	0.676918	0.169464	375	312	0.878125	0.0564439	161	171	0.0273289	1.56338
AUGGCC	15	10	0.55557	-0.255261	321	254	0.675245	-0.170538	124	94	0.540528	-0.267182
AUGGCG	21	7	0.0351442	-1.45415	155	82	0.00133081	-2.87588	39	26	0.455076	-0.341916
AUGGCU	16	17	0.602074	0.22035	269	312	3.51797e-05	4.45371	138	156	0.00837378	2.07708
AUGGGA	9	15	0.150512	0.82243	281	306	0.000660097	3.18039	186	158	0.870968	0.0599978
AUGGGC	14	16	0.467647	0.330082	263	232	0.442601	0.353988	107	85	0.772361	-0.11218
AUGGGG	13	21	0.0846748	1.07225	250	210	0.81489	0.0889012	221	152	0.0769613	-1.11373
AUGGGU	9	6	0.797085	-0.0984952	131	129	0.15173	0.818927	131	123	0.344691	0.462569
AUGGUA	2	14	0.00151111	2.8207	120	116	0.214389	0.668797	152	139	0.444056	0.352562
AUGGUC	8	3	0.24137	-0.617317	154	156	0.0677393	1.16916	82	82	0.240215	0.6194
AUGGUG	11	23	0.0151265	1.82026	349	291	0.873752	0.0586118	187	190	0.0554688	1.25595
AUGGUU	12	17	0.195901	0.707963	189	165	0.593316	0.226714	188	164	0.66855	0.174866
AUGUAA	8	14	0.133432	0.874738	111	217	1.90337e-14	13.7205	319	311	0.0453931	1.34301
AUGUAC	5	10	0.126288	0.898638	158	148	0.251125	0.60011	200	142	0.158059	-0.801182
AUGUAG	5	7	0.564632	0.248235	88	73	1	0	180	150	1	0
AUGUAU	6	7	0.592154	0.227565	125	136	0.0249937	1.60217	366	322	0.466854	0.330818
AUGUCA	5	17	0.00443144	2.35345	246	273	0.000667825	3.17534	164	188	0.00268109	2.57169
AUGUCC	6	10	0.216617	0.664307	229	243	0.00548552	2.26078	129	103	0.792154	-0.10119
AUGUCG	4	3	1	0	72	38	0.0274781	-1.56101	23	22	0.65582	0.183215
AUGUCU	6	18	0.00653717	2.18461	197	206	0.0161889	1.79078	215	206	0.155608	0.807969
AUGUGA	21	24	0.371279	0.4303	240	382	4.21869e-16	15.3748	273	272	0.0349661	1.45635
AUGUGC	11	13	0.540117	0.267512	217	195	0.372948	0.428352	174	159	0.409051	0.388223
AUGUGG	15	19	0.302923	0.518667	310	578	5.23006e-33	32.2815	222	212	0.14828	0.828918
AUGUGU	7	20	0.00576541	2.23917	197	187	0.166088	0.779662	367	280	0.286556	-0.542791
AUGUUA	3	8	0.127154	0.895669	120	101	0.892503	0.0493904	243	192	0.630166	-0.200545
AUGUUC	9	4	0.405222	-0.392307	183	190	0.0251537	1.5994	183	165	0.451366	0.345471
AUGUUG	16	13	1	0	176	177	0.0610755	1.21413	254	218	0.746258	0.127111
AUGUUU	9	23	0.0041051	2.38668	170	172	0.0570767	1.24354	523	393	0.135293	-0.868724
AUUAAA	16	23	0.147366	0.831604	182	159	0.586446	0.231772	429	472	2.79e-05	4.555
AUUAAC	9	9	0.81548	0.0885867	77	82	0.110813	0.955408	150	141	0.316838	0.499163
AUUAAG	18	15	1	0	121	96	0.837961	-0.0767764	163	170	0.0415448	1.38148
AUUAAU	9	13	0.285639	0.544183	111	99	0.579222	0.237155	234	274	0.000122509	3.91183
AUUACA	13	18	0.209305	0.67922	168	177	0.022926	1.63967	192	226	0.00039426	3.40422
AUUACC	5	5	1	0	131	123	0.284648	0.545693	101	108	0.0709193	1.14924
AUUACG	5	1	0.226858	-0.644246	35	45	0.0554824	1.25584	14	15	0.576952	0.238861
AUUACU	11	18	0.0955431	1.0198	107	139	0.000403393	3.39427	171	152	0.576306	0.239346
AUUAGA	5	14	0.0201633	1.69544	113	83	0.473093	-0.325054	149	160	0.0257455	1.5893
AUUAGC	7	13	0.116187	0.934842	59	60	0.269017	0.570221	121	134	0.0234267	1.63029
AUUAGG	10	14	0.306124	0.514103	50	45	0.680787	0.166989	112	109	0.250953	0.600408
AUUAGU	5	11	0.0818435	1.08702	61	55	0.641411	0.192864	143	140	0.17004	0.76945
AUUAUA	5	15	0.0123001	1.91009	88	101	0.0232867	1.63289	271	271	0.0310135	1.50845
AUUAUC	4	13	0.0143212	1.84402	103	131	0.000980835	3.0084	110	128	0.0109584	1.96025
AUUAUG	4	6	0.528922	0.276608	154	151	0.134482	0.871337	201	210	0.0225407	1.64703
AUUAUU	18	27	0.0726726	1.13863	115	178	1.00326e-07	6.99859	393	383	0.0277572	1.55662
AUUCAA	14	16	0.467647	0.330082	174	235	5.96941e-07	6.22407	177	235	2.35e-06	5.62822
AUUCAC	12	9	0.82921	-0.0813353	167	212	2.70948e-05	4.56711	119	172	2.92e-06	5.53424
AUUCAG	18	31	0.0210408	1.67694	343	304	0.343026	0.464673	227	212	0.230734	0.636889
AUUCAU	14	22	0.0934986	1.02919	138	279	3.52554e-19	18.4528	180	290	1.68e-12	11.7745
AUUCCA	10	22	0.0124033	1.90646	271	261	0.0672805	1.17211	259	197	0.371496	-0.430046
AUUCCC	22	21	0.761235	0.118481	192	151	0.704376	-0.152195	163	166	0.0676144	1.16996
AUUCCG	7	11	0.240941	0.61809	63	60	0.416241	0.380655	25	15	0.34432	-0.463038
AUUCCU	23	30	0.13215	0.878932	251	242	0.077508	1.11065	218	196	0.429864	0.366669
AUUCGA	4	3	1	0	61	57	0.51762	0.285989	25	15	0.34432	-0.463038
AUUCGC	8	1	0.0439692	-1.35685	57	34	0.141893	-0.84804	17	17	0.609118	0.215299
AUUCGG	11	9	1	0	66	58	0.718847	0.143363	26	17	0.540626	-0.267103
AUUCGU	5	5	1	0	40	46	0.129385	0.888115	24	17	0.641623	-0.19272
AUUCUA	3	11	0.0280735	1.5517	115	124	0.0374171	1.42693	181	205	0.00252089	2.59845
AUUCUC	20	26	0.183638	0.736038	189	167	0.489271	0.310451	196	221	0.00191706	2.71736
AUUCUG	24	42	0.00616177	2.21029	271	288	0.00251456	2.59954	276	243	0.508745	0.2935
AUUCUU	18	26	0.0967267	1.01445	200	210	0.0130576	1.88414	324	323	0.0219163	1.65923
AUUGAA	12	26	0.00836113	2.07774	228	244	0.00410733	2.38644	233	218	0.21876	0.660032
AUUGAC	14	8	0.398617	-0.399445	141	164	0.00271188	2.56673	113	105	0.415012	0.381939
AUUGAG	20	23	0.361446	0.441956	170	152	0.466687	0.330974	141	141	0.1203	0.919735
AUUGAU	15	12	1	0	170	152	0.466687	0.330974	171	154	0.469447	0.328413
AUUGCA	13	17	0.275249	0.560274	159	181	0.00269322	2.56973	190	189	0.0796121	1.09902
AUUGCC	11	10	1	0	184	202	0.0048409	2.31507	125	101	0.841536	-0.0749275
AUUGCG	5	7	0.564632	0.248235	44	27	0.28303	-0.548167	24	17	0.641623	-0.19272
AUUGCU	13	22	0.0610791	1.21411	185	153	0.956449	0.0193382	218	197	0.4021	0.395666
AUUGGA	18	14	0.860184	-0.0654088	228	223	0.0649759	1.18725	155	143	0.382926	0.416885
AUUGGC	26	16	0.353589	-0.451501	164	151	0.308853	0.510249	117	87	0.440269	-0.356282
AUUGGG	15	17	0.480502	0.318305	149	120	0.902546	-0.0445308	156	100	0.0445138	-1.35151
AUUGGU	10	11	0.663462	0.178184	106	125	0.00660665	2.18002	154	132	0.812332	0.0902663
AUUGUA	5	13	0.0326406	1.48624	74	89	0.0179348	1.7463	337	213	0.00174895	-2.75722
AUUGUC	6	16	0.016973	1.77024	146	121	0.951016	0.021812	166	132	0.727253	-0.138314
AUUGUG	11	21	0.03273	1.48505	184	210	0.00117142	2.93129	265	214	0.783088	-0.106189
AUUGUU	12	21	0.0540621	1.26711	117	116	0.166665	0.778156	350	303	0.609421	0.215082
AUUUAA	20	19	0.75135	0.124158	137	144	0.0413934	1.38307	505	430	0.71783	0.143979
AUUUAC	6	14	0.0421359	1.37535	109	133	0.00233616	2.6315	169	192	0.00304405	2.51655
AUUUAG	3	7	0.203463	0.691515	95	85	0.60023	0.221682	206	189	0.337029	0.472332
AUUUAU	13	19	0.156875	0.804447	125	167	3.60235e-05	4.44341	534	526	0.00599594	2.22214
AUUUCA	27	33	0.195528	0.70879	234	307	5.87456e-08	7.23102	378	387	0.00408642	2.38866
AUUUCC	27	41	0.0208852	1.68016	186	229	4.03419e-05	4.39424	248	272	0.00173585	2.76049
AUUUCG	11	1	0.0080634	-2.09348	54	49	0.621818	0.206337	33	28	1	0
AUUUCU	18	34	0.00760779	2.11874	179	257	8.24218e-09	8.08396	468	450	0.0285773	1.54398
AUUUGA	18	15	1	0	238	207	0.56759	0.245966	303	301	0.0302031	1.51995
AUUUGC	20	20	0.63809	0.195118	148	159	0.0187118	1.72788	253	210	1	0
AUUUGG	28	27	0.686802	0.163169	213	209	0.0702502	1.15335	299	233	0.485974	-0.313387
AUUUGU	15	32	0.00310499	2.50794	140	147	0.03793	1.42102	436	375	0.621595	0.206493
AUUUUA	16	27	0.0322277	1.49177	147	177	0.000639969	3.19384	688	584	0.714191	0.146185
AUUUUC	21	31	0.0695309	1.15782	168	223	2.64101e-06	5.57823	469	391	0.972676	0.0120319
AUUUUG	23	40	0.0074985	2.12503	272	267	0.0417897	1.37893	594	415	0.0071467	-2.14589
AUUUUU	39	57	0.0103578	1.98473	145	228	5.99862e-10	9.22195	1192	925	0.120904	-0.917559
CAAAAA	24	36	0.0377355	1.42325	441	339	0.368431	-0.433644	433	449	0.00102485	2.98934
CAAAAC	9	29	0.000235072	3.6288	275	239	0.534963	0.271676	229	208	0.361422	0.441986
CAAAAG	19	40	0.000976975	3.01012	374	328	0.383272	0.416493	253	233	0.274125	0.562051
CAAAAU	13	25	0.0214978	1.66761	276	296	0.00160016	2.79584	304	363	2.91e-06	5.53622
CAAACA	16	25	0.0613522	1.21217	311	256	1	0	199	234	0.00034345	3.46414
CAAACC	15	22	0.136867	0.863702	271	196	0.177766	-0.750152	159	139	0.683923	0.164993
CAAACG	10	7	0.809465	-0.0918017	103	67	0.143483	-0.843198	31	21	0.489835	-0.30995
CAAACU	15	28	0.0141764	1.84843	257	192	0.342857	-0.464886	186	211	0.0020714	2.68374
CAAAGA	32	36	0.275675	0.559603	549	437	0.631288	-0.199772	212	250	0.000179673	3.74552
CAAAGC	29	26	0.893104	0.0490978	356	346	0.0277222	1.55717	180	170	0.237714	0.623946
CAAAGG	26	39	0.0336192	1.47341	321	297	0.145504	0.837126	191	192	0.064624	1.18961
CAAAGU	14	26	0.0251325	1.59976	245	252	0.0130852	1.88322	218	219	0.0488005	1.31158
CAAAUA	9	21	0.00999029	2.00042	218	181	0.919915	0.0362524	261	322	1.98e-06	5.7039
CAAAUC	11	14	0.422953	0.373708	239	203	0.73802	0.131932	137	145	0.0421336	1.37537
CAAAUG	12	24	0.0181597	1.74089	315	376	9.31893e-07	6.03063	248	265	0.00450725	2.34609
CAAAUU	9	26	0.00101369	2.99409	208	219	0.0113525	1.94491	232	218	0.201074	0.696644
CAACAA	11	21	0.03273	1.48505	422	353	0.800571	0.0966001	160	160	0.103386	0.985538
CAACAC	10	21	0.0186828	1.72856	265	200	0.376187	-0.424596	101	119	0.0100153	1.99934
CAACAG	20	30	0.0641958	1.19249	571	344	5.10408e-06	-5.29208	145	160	0.0133861	1.87335
CAACAU	13	15	0.454179	0.342773	314	298	0.0739426	1.13111	137	172	0.000308005	3.51144
CAACCA	19	22	0.351433	0.454158	353	294	0.874442	0.0582689	145	131	0.506211	0.295668
CAACCC	28	27	0.686802	0.163169	299	231	0.51262	-0.290205	119	103	0.787573	0.103709
CAACCG	12	13	0.689147	0.161688	117	79	0.196309	-0.70706	25	13	0.19357	-0.713163
CAACCU	11	23	0.0151265	1.82026	298	262	0.420071	0.376678	145	134	0.399915	0.398032
CAACGA	7	6	1	0	122	91	0.535543	-0.271206	20	16	1	0
CAACGC	15	9	0.420945	-0.375774	88	64	0.514481	-0.28863	15	9	0.540222	-0.267428
CAACGG	13	11	1	0	148	74	0.000430704	-3.36582	22	13	0.396949	-0.401265
CAACGU	6	2	0.300381	-0.522328	113	112	0.159996	0.795891	28	31	0.296441	0.528061
CAACUA	5	14	0.0201633	1.69544	127	145	0.0072442	2.14001	94	95	0.188621	0.72441
CAACUC	15	15	0.716724	0.144648	253	209	0.962724	0.0164981	123	109	0.644614	0.1907
CAACUG	26	19	0.655101	-0.183692	294	289	0.030427	1.51674	118	106	0.591484	0.228057
CAACUU	25	17	0.536709	-0.270261	239	250	0.00832253	2.07974	155	167	0.0216044	1.66546
CAAGAA	22	46	0.000553741	3.25669	675	549	0.885778	-0.0526752	202	247	4.41e-05	4.35596
CAAGAC	20	24	0.291751	0.534988	321	285	0.347785	0.458689	122	136	0.0205151	1.68793
CAAGAG	29	38	0.0873991	1.05849	395	367	0.0938912	1.02738	183	164	0.483808	0.315327
CAAGAU	18	15	1	0	379	332	0.406976	0.390432	166	158	0.220223	0.657138
CAAGCA	18	28	0.0540536	1.26718	512	301	3.70185e-06	-5.43158	140	169	0.00110146	2.95803
CAAGCC	25	29	0.277904	0.556105	434	285	0.00343482	-2.4641	168	120	0.21419	-0.6692
CAAGCG	15	9	0.420945	-0.375774	182	87	2.19947e-05	-4.65768	33	25	0.792602	-0.100945
CAAGCU	24	25	0.567154	0.246299	358	292	0.937209	-0.0281637	159	125	0.676662	-0.169629
CAAGGA	27	43	0.0116216	1.93473	613	512	0.787398	0.103805	205	167	0.875913	-0.0575391
CAAGGC	28	29	0.5082	0.293966	396	317	0.763346	-0.117279	135	119	0.659296	0.180919
CAAGGG	21	30	0.0909537	1.04118	315	206	0.0120079	-1.92053	154	118	0.542627	-0.265498
CAAGGU	10	28	0.000881327	3.05486	276	245	0.378796	0.421594	144	131	0.467592	0.330133
CAAGUA	8	19	0.0187717	1.7265	210	152	0.245424	-0.610084	132	131	0.154496	0.811082
CAAGUC	15	20	0.235468	0.628069	260	227	0.523789	0.280844	111	97	0.728062	0.137832
CAAGUG	16	26	0.0446952	1.34974	362	294	0.906319	-0.042719	189	187	0.0972801	1.01198
CAAGUU	13	17	0.275249	0.560274	241	246	0.0177923	1.74977	202	142	0.129689	-0.887097
CAAUAA	8	18	0.0284622	1.54573	146	136	0.309026	0.510005	207	253	3.63e-05	4.44029
CAAUAC	1	4	0.188656	0.724328	114	100	0.63134	0.199737	65	85	0.00662078	2.17909
CAAUAG	7	7	0.795029	0.0996171	95	87	0.502703	0.298689	94	105	0.0388736	1.41034
CAAUAU	7	13	0.116187	0.934842	114	145	0.000457156	3.33994	151	170	0.00704785	2.15194
CAAUCA	14	17	0.370654	0.431031	170	149	0.573925	0.241145	117	117	0.167895	0.774962
CAAUCC	15	9	0.420945	-0.375774	144	130	0.466347	0.331291	77	81	0.150291	0.823068
CAAUCG	5	4	1	0	37	38	0.354344	0.450575	4	15	0.00442866	2.35373
CAAUCU	11	13	0.540117	0.267512	133	124	0.316311	0.499885	126	137	0.0301535	1.52066
CAAUGA	13	11	1	0	304	282	0.146178	0.835117	122	167	2.54e-05	4.59589
CAAUGC	3	8	0.127154	0.895669	206	214	0.0162522	1.78909	100	120	0.00670051	2.17389
CAAUGG	15	10	0.55557	-0.255261	310	262	0.736879	0.132604	94	137	2.81e-05	4.55195
CAAUGU	4	13	0.0143212	1.84402	173	217	3.52884e-05	4.45237	169	140	1	0
CAAUUA	5	17	0.00443144	2.35345	108	118	0.0324745	1.48846	125	163	0.000145047	3.83849
CAAUUC	5	18	0.00262322	2.58117	162	156	0.159107	0.79831	122	122	0.157177	0.803612
CAAUUG	15	16	0.591583	0.227984	114	112	0.18167	0.740718	106	108	0.149203	0.826223
CAAUUU	12	10	1	0	134	184	5.8661e-06	5.23165	219	212	0.121454	0.915589
CACAAA	15	28	0.0141764	1.84843	297	267	0.290171	0.537347	224	229	0.0298236	1.52544
CACAAC	16	18	0.492776	0.30735	258	169	0.0222718	-1.65225	93	102	0.052454	1.28022
CACAAG	8	24	0.00117573	2.92969	338	263	0.538625	-0.268713	129	145	0.0128041	1.89265
CACAAU	7	18	0.0143784	1.84229	149	133	0.510458	0.29204	112	131	0.00817132	2.08771
CACACA	20	73	2.25844e-10	9.64619	309	257	0.899173	0.0461569	370	383	0.00266348	2.57455
CACACC	18	33	0.0107591	1.96823	336	244	0.155868	-0.807244	145	144	0.139554	0.855259
CACACG	6	18	0.00653717	2.18461	124	79	0.0782386	-1.10658	52	42	0.917834	-0.0372356
CACACU	15	32	0.00310499	2.50794	211	283	6.43034e-08	7.19177	191	200	0.0222809	1.65207
CACAGA	21	56	3.02986e-06	5.51858	524	416	0.622941	-0.205553	238	208	0.601066	0.221078
CACAGC	44	49	0.213678	0.67024	572	407	0.028873	-1.53951	228	206	0.385819	0.413617
CACAGG	18	45	6.62942e-05	4.17852	345	341	0.0156009	1.80685	250	185	0.247741	-0.606003
CACAGU	14	28	0.0083738	2.07708	316	287	0.219661	0.658247	211	196	0.273384	0.563226
CACAUA	9	6	0.797085	-0.0984952	110	124	0.0178403	1.7486	127	176	1.05e-05	4.97818
CACAUC	11	23	0.0151265	1.82026	281	244	0.539245	0.268214	139	130	0.358324	0.445725
CACAUG	10	15	0.228118	0.64184	258	208	0.852414	-0.0693493	186	182	0.116553	0.933475
CACAUU	18	20	0.515712	0.287592	179	201	0.00233307	2.63207	217	247	0.000769883	3.11358
CACCAA	12	17	0.195901	0.707963	470	351	0.182626	-0.738438	148	143	0.216204	0.665137
CACCAC	27	39	0.0473739	1.32446	601	287	1.04896e-14	-13.9792	190	160	0.914543	0.0387959
CACCAG	36	41	0.252857	0.597126	647	457	0.0142341	-1.84667	230	149	0.0176483	-1.7533
CACCAU	12	20	0.076062	1.11883	378	345	0.155691	0.807737	156	174	0.00789202	2.10281
CACCCA	33	59	0.000729509	3.13697	502	331	0.00192573	-2.71541	194	168	0.711843	0.147616
CACCCC	66	40	0.0971812	-1.01242	606	255	1.5608e-20	-19.8067	325	157	1.18e-08	-7.92768
CACCCG	51	19	0.00162757	-2.78846	209	100	5.72534e-06	-5.2422	58	30	0.0413187	-1.38385
CACCCU	47	49	0.35793	0.446202	387	254	0.00543863	-2.26451	213	166	0.570402	-0.243819
CACCGA	24	9	0.0351562	-1.454	177	123	0.163835	-0.785593	22	25	0.306901	0.513002
CACCGC	81	40	0.00449528	-2.34724	229	98	2.95084e-08	-7.53005	48	28	0.1664	-0.778848
CACCGG	34	23	0.426253	-0.370333	207	119	0.00180305	-2.74399	63	26	0.00266515	-2.57428
CACCGU	11	13	0.540117	0.267512	151	97	0.064071	-1.19334	41	37	0.734025	0.134289
CACCUA	10	11	0.663462	0.178184	181	154	0.742246	0.129452	92	98	0.0936457	1.02851
CACCUC	36	41	0.252857	0.597126	523	306	1.97199e-06	-5.7051	241	166	0.0654368	-1.18418
CACCUG	33	53	0.00471288	2.32671	576	403	0.0145836	-1.83614	234	228	0.0924067	1.0343
CACCUU	26	32	0.188535	0.724608	348	274	0.628722	-0.201541	235	158	0.0425739	-1.37086
CACGAA	9	3	0.159918	-0.796104	90	63	0.371563	-0.429968	34	18	0.127213	-0.895469
CACGAC	14	7	0.278245	-0.555573	107	54	0.00329837	-2.4817	17	23	0.152415	0.816973
CACGAG	8	11	0.360908	0.442603	145	75	0.00110139	-2.95806	31	37	0.144694	0.839549
CACGAU	4	6	0.528922	0.276608	75	37	0.010301	-1.98712	31	25	1	0
CACGCA	19	18	0.86934	0.0608104	105	80	0.657723	-0.181957	39	34	0.906544	0.0426109
CACGCC	29	22	0.676605	-0.169665	207	99	6.69101e-06	-5.17451	69	44	0.186135	-0.730171
CACGCG	19	11	0.361036	-0.44245	61	44	0.556762	-0.25433	19	8	0.122284	-0.912632
CACGCU	23	14	0.327417	-0.484899	125	98	0.78786	-0.103551	31	26	1	0
CACGGA	16	17	0.602074	0.22035	151	120	0.807322	-0.0929532	52	26	0.040001	-1.39793
CACGGC	37	31	1	0	220	123	0.000610721	-3.21416	41	28	0.469102	-0.328733
CACGGG	22	17	0.872672	-0.0591489	151	126	0.903989	0.0438367	51	28	0.089628	-1.04756
CACGGU	14	9	0.537189	-0.269873	89	79	0.642087	0.192406	33	29	0.898662	0.0464038
CACGUA	5	5	1	0	37	24	0.440392	-0.35616	37	17	0.0410693	-1.38648
CACGUC	12	5	0.224411	-0.648957	119	74	0.0603169	-1.21956	47	26	0.100509	-0.997795
CACGUG	18	18	0.738782	0.131484	129	116	0.480765	0.318067	89	49	0.0208569	-1.68075
CACGUU	6	6	1	0	71	50	0.412866	-0.384191	57	39	0.358536	-0.445467
CACUAA	6	12	0.0989235	1.0047	111	86	0.720584	-0.142316	95	123	0.00133301	2.87516
CACUAC	12	11	1	0	190	118	0.018744	-1.72714	86	101	0.0187119	1.72788
CACUAG	8	6	1	0	84	60	0.451228	-0.345604	90	80	0.700265	0.154737
CACUAU	8	9	0.631952	0.199316	102	92	0.517016	0.286496	92	107	0.0187044	1.72806
CACUCA	12	21	0.0540621	1.26711	232	205	0.442321	0.354263	163	151	0.33587	0.473829
CACUCC	31	35	0.269516	0.569416	291	166	0.000163901	-3.78542	193	161	1	0
CACUCG	15	16	0.591583	0.227984	108	58	0.00984927	-2.0066	29	22	0.780193	-0.107798
CACUCU	23	34	0.0462382	1.335	199	177	0.437546	0.358976	168	170	0.0714763	1.14584
CACUGA	26	50	0.000747149	3.12659	296	282	0.0790472	1.10211	193	195	0.0590538	1.22875
CACUGC	43	47	0.290313	0.537133	412	297	0.0894191	-1.04857	236	198	0.923244	0.0346836
CACUGG	25	42	0.00953633	2.02062	379	449	1.49599e-07	6.82507	241	180	0.282015	-0.549728
CACUGU	20	31	0.0482192	1.31678	298	256	0.608488	0.215748	275	246	0.403337	0.394332
CACUUA	10	8	1	0	131	86	0.116522	-0.933591	161	133	1	0
CACUUC	24	27	0.399635	0.398336	292	236	0.86126	-0.0648659	213	149	0.113233	-0.946027
CACUUG	20	20	0.63809	0.195118	179	143	0.82293	-0.0846371	218	165	0.383084	-0.416706
CACUUU	21	31	0.0695309	1.15782	193	197	0.0325577	1.48735	362	294	0.783773	-0.10581
CAGAAA	37	67	0.000238064	3.62331	619	570	0.0507526	1.29454	336	373	0.000116742	3.93277
CAGAAC	32	29	0.898015	0.0467163	400	283	0.0594247	-1.22603	196	174	0.531232	0.274715
CAGAAG	50	73	0.00370831	2.43082	726	636	0.241469	0.617139	289	250	0.665286	0.176992
CAGAAU	19	17	1	0	385	347	0.2202	0.657183	239	268	0.00080478	3.09432
CAGACA	23	38	0.014155	1.84909	430	383	0.259294	0.586207	197	172	0.638264	0.194999
CAGACC	36	39	0.354392	0.450516	394	253	0.00232296	-2.63396	164	142	0.730679	0.136274
CAGACG	25	24	0.774869	0.110771	139	102	0.400643	-0.397242	47	27	0.130451	-0.884551
CAGACU	20	31	0.0482192	1.31678	326	250	0.426431	-0.370152	220	127	0.000988828	-3.00488
CAGAGA	37	86	1.50753e-07	6.82173	564	622	4.22682e-07	6.37399	254	231	0.338142	0.470901
CAGAGC	64	86	0.00676258	2.16989	585	387	0.000997393	-3.00113	246	180	0.205791	-0.686574
CAGAGG	58	82	0.00381422	2.41859	566	501	0.230071	0.638138	256	197	0.422874	-0.373789
CAGAGU	31	28	0.896414	0.0474915	306	256	0.832221	0.0797612	176	174	0.107304	0.969386
CAGAUA	12	15	0.341716	0.466335	205	195	0.145188	0.83807	155	148	0.226212	0.645484
CAGAUC	17	21	0.329025	0.482772	329	288	0.442085	0.354494	111	119	0.0548408	1.2609
CAGAUG	15	28	0.0141764	1.84843	642	494	0.283054	-0.54813	242	192	0.664388	-0.177578
CAGAUU	16	26	0.0446952	1.34974	286	240	0.826601	0.082704	246	190	0.470662	-0.327291
CAGCAA	35	41	0.205425	0.687346	776	431	4.47514e-11	-10.3492	201	166	1	0
CAGCAC	38	40	0.426769	0.369807	659	350	2.08912e-11	-10.68	205	173	0.877001	0.0569997
CAGCAG	105	107	0.215483	0.666587	1698	781	2.44753e-43	-42.6113	343	250	0.117129	-0.931336
CAGCAU	22	19	1	0	461	347	0.229303	-0.63959	201	188	0.241999	0.616186
CAGCCA	71	66	0.668697	0.174771	882	538	4.30975e-08	-7.36555	278	216	0.469898	-0.327996
CAGCCC	130	112	1	0	1009	463	1.28749e-26	-25.8903	331	183	8.81e-06	-5.05486
CAGCCG	95	48	0.00245079	-2.61069	383	171	8.4356e-12	-11.0739	70	29	0.00118455	-2.92645
CAGCCU	63	86	0.00512147	2.29061	827	471	1.49259e-10	-9.82606	350	296	0.843363	0.0739856
CAGCGA	37	21	0.147415	-0.831458	268	162	0.00222582	-2.65251	33	25	0.792602	-0.100945
CAGCGC	101	38	7.57868e-06	-5.12041	332	164	5.39912e-08	-7.26768	57	29	0.0304956	-1.51576
CAGCGG	127	57	3.05867e-05	-4.51447	379	219	3.1777e-05	-4.49789	63	34	0.0417616	-1.37922
CAGCGU	20	16	0.868728	-0.0611164	163	126	0.63648	-0.196215	65	31	0.0102465	-1.98943
CAGCUA	16	28	0.0230126	1.63803	267	173	0.0164978	-1.78257	135	165	0.000921863	3.03533
CAGCUC	70	59	0.929874	-0.0315761	713	483	0.00112344	-2.94945	251	179	0.12128	-0.91621
CAGCUG	78	70	0.804991	0.094209	912	710	0.294451	-0.530987	352	239	0.0165014	-1.78248
CAGCUU	37	43	0.180143	0.744382	461	308	0.00522759	-2.2817	259	177	0.0484645	-1.31458
CAGGAA	49	43	0.917168	0.0375509	501	547	4.18492e-06	5.37831	273	260	0.117339	0.930556
CAGGAC	30	61	8.11867e-05	4.09051	406	370	0.149047	0.826676	189	142	0.377404	-0.423194
CAGGAG	69	94	0.00357014	2.44732	707	576	0.910623	-0.0406612	314	286	0.268237	0.571482
CAGGAU	20	24	0.291751	0.534988	302	261	0.553347	0.257002	169	164	0.168717	0.772841
CAGGCA	45	53	0.128636	0.890636	448	363	0.859987	-0.0655079	234	230	0.0762752	1.11762
CAGGCC	84	54	0.104645	-0.980281	573	380	0.00125574	-2.9011	247	148	0.00169503	-2.77082
CAGGCG	70	38	0.0259619	-1.58566	173	99	0.00412118	-2.38498	68	50	0.519412	-0.284488
CAGGCU	50	56	0.173935	0.759612	435	286	0.00348502	-2.45779	235	234	0.0513921	1.2891
CAGGGA	46	59	0.0497116	1.30354	385	360	0.0772001	1.11238	265	203	0.403354	-0.394314
CAGGGC	81	61	0.449917	-0.346868	416	292	0.0413356	-1.38368	271	166	0.00206889	-2.68426
CAGGGG	66	48	0.398964	-0.399066	333	250	0.298092	-0.525649	227	158	0.0911758	-1.04012
CAGGGU	30	31	0.521418	0.282814	189	175	0.268645	0.570822	225	155	0.0796503	-1.09881
CAGGUA	8	14	0.133432	0.874738	118	109	0.386341	0.413029	132	99	0.467524	-0.330196
CAGGUC	24	27	0.399635	0.398336	211	207	0.0691183	1.16041	133	105	0.74486	-0.127925
CAGGUG	24	60	4.62167e-06	5.3352	437	352	0.80228	-0.0956738	262	173	0.0206873	-1.6843
CAGGUU	14	24	0.0494645	1.30571	224	142	0.0156639	-1.8051	186	145	0.581224	-0.235657
CAGUAA	12	14	0.440069	0.356479	198	129	0.0452603	-1.34428	175	193	0.0074919	2.12541
CAGUAC	10	13	0.403802	0.393832	232	170	0.2703	-0.568154	104	84	0.883642	-0.0537235
CAGUAG	17	15	1	0	174	84	4.47878e-05	-4.34884	161	132	0.953223	-0.0208054
CAGUAU	9	11	0.50392	0.297638	201	167	0.916636	0.0378032	206	156	0.398508	-0.399563
CAGUCA	22	32	0.056902	1.24487	376	269	0.0887658	-1.05175	143	145	0.0973783	1.01154
CAGUCC	45	28	0.197268	-0.704943	384	217	9.06335e-06	-5.04271	160	94	0.00801199	-2.09626
CAGUCG	28	13	0.0836538	-1.07751	108	85	0.828271	-0.0818274	40	15	0.00667219	-2.17573
CAGUCU	34	26	0.698962	-0.155547	308	196	0.00546385	-2.2625	212	162	0.43623	-0.360284
CAGUGA	31	38	0.14835	0.828711	511	460	0.155841	0.807318	261	227	0.61721	0.209567
CAGUGC	33	25	0.693693	-0.158832	470	366	0.465409	-0.332166	218	144	0.0346101	-1.4608
CAGUGG	47	46	0.534411	0.272125	608	519	0.529502	0.276132	285	228	0.689897	-0.161216
CAGUGU	27	31	0.293188	0.532854	369	355	0.0332736	1.4779	284	230	0.790466	-0.102117
CAGUUA	5	14	0.0201633	1.69544	172	124	0.293066	-0.533034	166	160	0.18219	0.739475
CAGUUC	22	31	0.074876	1.12566	374	293	0.559532	-0.252175	202	165	0.916502	-0.0378668
CAGUUG	11	23	0.0151265	1.82026	272	203	0.310617	-0.507775	227	143	0.0104082	-1.98262
CAGUUU	25	36	0.0534324	1.2722	326	262	0.803752	-0.0948782	365	272	0.176217	-0.753952
CAUAAA	10	15	0.228118	0.64184	145	146	0.0874706	1.05814	197	244	3.01e-05	4.52087
CAUAAC	3	6	0.318207	0.49729	64	57	0.714958	0.14572	70	110	2.47e-05	4.6077
CAUAAG	6	7	0.592154	0.227565	84	130	4.96225e-06	5.30432	93	116	0.00347996	2.45843
CAUAAU	2	8	0.0521048	1.28312	85	79	0.433638	0.362873	136	178	6.81e-05	4.16704
CAUACA	4	13	0.0143212	1.84402	122	146	0.0021193	2.67381	94	165	4.39e-09	8.35758
CAUACC	7	7	0.795029	0.0996171	117	114	0.208982	0.679891	83	65	0.741853	-0.129682
CAUACG	2	2	1	0	37	34	0.635724	0.196732	26	17	0.540626	-0.267103
CAUACU	8	12	0.263933	0.578506	90	188	4.68714e-14	13.3291	140	143	0.0835577	1.07801
CAUAGA	9	15	0.150512	0.82243	105	136	0.000453897	3.34304	147	123	0.951353	0.0216583
CAUAGC	4	8	0.245974	0.609111	92	65	0.37809	-0.422405	87	101	0.0230723	1.63691
CAUAGG	6	4	0.760933	-0.118654	59	64	0.124353	0.905343	96	88	0.506216	0.295664
CAUAGU	10	11	0.663462	0.178184	67	60	0.656105	0.183027	116	110	0.34962	0.456404
CAUAUA	1	9	0.00763111	2.11741	55	88	9.74937e-05	4.01102	162	174	0.0212242	1.67317
CAUAUC	3	4	0.710841	0.148228	88	97	0.0462	1.33536	78	117	5.05e-05	4.29701
CAUAUG	6	10	0.216617	0.664307	148	137	0.312293	0.505437	122	142	0.0064727	2.18891
CAUAUU	14	9	0.537189	-0.269873	122	136	0.0146345	1.83462	216	228	0.0130897	1.88307
CAUCAA	9	14	0.209082	0.679683	409	420	0.00131158	2.8822	102	142	6.29e-05	4.20119
CAUCAC	14	20	0.168794	0.772643	347	338	0.0259191	1.58638	146	109	0.413977	-0.383024
CAUCAG	15	22	0.136867	0.863702	463	441	0.0273046	1.56376	177	178	0.0783967	1.1057
CAUCAU	16	17	0.602074	0.22035	349	347	0.0119012	1.92441	146	166	0.0062581	2.20356
CAUCCA	18	25	0.127389	0.894868	406	367	0.193074	0.714276	136	150	0.0174404	1.75844
CAUCCC	44	37	1	0	389	228	5.02095e-05	-4.29921	180	117	0.0412399	-1.38468
CAUCCG	19	15	0.864611	-0.063179	162	119	0.368933	-0.433053	19	17	0.867967	0.061497
CAUCCU	18	39	0.000809158	3.09197	424	373	0.33654	0.472963	210	193	0.317229	0.498627
CAUCGA	5	5	1	0	180	147	1	0	19	17	0.867967	0.061497
CAUCGC	26	9	0.0169074	-1.77192	132	110	0.948512	0.0229574	22	27	0.196921	0.705707
CAUCGG	12	8	0.65768	-0.181986	132	106	0.896429	-0.0474843	22	13	0.396949	-0.401265
CAUCGU	14	4	0.0563715	-1.24894	140	132	0.272733	0.564262	40	30	0.719637	-0.142887
CAUCUA	13	13	0.699748	0.155058	170	164	0.152701	0.816158	113	123	0.0424692	1.37193
CAUCUC	20	36	0.00717688	2.14406	367	302	1	0	219	222	0.0395967	1.40234
CAUCUG	22	24	0.460957	0.33634	361	319	0.354964	0.449815	224	188	0.921237	0.0356285
CAUCUU	34	23	0.426253	-0.370333	306	313	0.00675551	2.17034	260	199	0.398859	-0.399181
CAUGAA	11	14	0.422953	0.373708	359	348	0.0283202	1.5479	187	219	0.000570607	3.24366
CAUGAC	5	11	0.0818435	1.08702	218	169	0.609508	-0.215021	97	123	0.00180818	2.74276
CAUGAG	14	12	1	0	232	216	0.184066	0.735027	137	161	0.00295804	2.529
CAUGAU	10	12	0.522824	0.281645	241	218	0.302439	0.519362	142	144	0.0963121	1.01632
CAUGCA	9	13	0.285639	0.544183	293	195	0.022929	-1.63962	175	153	0.657499	0.182105
CAUGCC	13	12	1	0	302	204	0.0319571	-1.49543	146	170	0.00272971	2.56388
CAUGCG	13	6	0.252348	-0.598	90	64	0.41821	-0.378605	29	18	0.38048	-0.419668
CAUGCU	10	15	0.228118	0.64184	264	249	0.120449	0.919195	140	162	0.00454726	2.34225
CAUGGA	11	18	0.0955431	1.0198	460	435	0.0371851	1.42963	201	185	0.331392	0.479658
CAUGGC	15	15	0.716724	0.144648	303	247	0.965823	-0.0151025	137	120	0.707063	0.150542
CAUGGG	7	14	0.0786173	1.10448	261	219	0.818722	0.0868636	185	136	0.287187	-0.541835
CAUGGU	6	16	0.016973	1.77024	215	189	0.515767	0.287547	158	155	0.155681	0.807764
CAUGUA	5	9	0.190961	0.719056	121	113	0.32535	0.487649	203	189	0.264636	0.577351
CAUGUC	9	19	0.0233314	1.63206	211	182	0.6483	0.188224	106	125	0.00814912	2.08889
CAUGUG	10	25	0.00342741	2.46503	229	238	0.0119504	1.92262	248	200	0.77594	-0.110172
CAUGUU	16	18	0.492776	0.30735	176	162	0.299366	0.523797	269	231	0.719468	0.142988
CAUUAA	13	12	1	0	166	117	0.210162	-0.677446	218	216	0.0670347	1.1737
CAUUAC	16	7	0.14682	-0.833216	130	119	0.407969	0.389373	102	100	0.258207	0.588033
CAUUAG	5	18	0.00262322	2.58117	91	80	0.700925	0.154328	118	114	0.262483	0.580899
CAUUAU	4	10	0.0652133	1.18566	127	129	0.0901705	1.04494	171	194	0.00319064	2.49612
CAUUCA	20	25	0.232765	0.633081	253	255	0.0228676	1.64078	175	231	4.11e-06	5.38601
CAUUCC	14	19	0.222502	0.652666	260	190	0.236249	-0.62663	204	189	0.287516	0.541338
CAUUCG	9	3	0.159918	-0.796104	67	62	0.535942	0.270882	30	21	0.576566	-0.239151
CAUUCU	24	30	0.174679	0.757759	198	215	0.0047786	2.3207	248	250	0.0342703	1.46508
CAUUGA	14	13	0.849469	0.0708523	246	284	9.87256e-05	4.00557	165	162	0.133883	0.873275
CAUUGC	9	19	0.0233314	1.63206	206	222	0.00556134	2.25482	143	153	0.0307211	1.51256
CAUUGG	20	12	0.377417	-0.423179	199	191	0.126947	0.896376	161	124	0.552069	-0.258006
CAUUGU	10	21	0.0186828	1.72856	182	167	0.30702	0.512833	287	189	0.012908	-1.88914
CAUUUA	5	14	0.0201633	1.69544	149	162	0.0141848	1.84818	295	296	0.0229832	1.63859
CAUUUC	24	33	0.0844481	1.07341	202	278	1.8764e-08	7.72667	324	307	0.101114	0.995188
CAUUUG	23	36	0.025979	1.58538	223	209	0.17584	0.754882	339	307	0.285905	0.543779
CAUUUU	31	45	0.0282034	1.5497	195	257	6.1911e-07	6.20823	627	590	0.0307301	1.51244
CCAAAA	22	23	0.551415	0.258521	372	285	0.388481	-0.41063	245	231	0.167541	0.775878
CCAAAC	21	26	0.242255	0.615727	290	205	0.103953	-0.983162	153	155	0.0859499	1.06575
CCAAAG	33	33	0.539897	0.267689	458	378	0.944597	0.0247536	216	229	0.0101295	1.99441
CCAAAU	13	24	0.0307543	1.51209	263	235	0.367751	0.434446	223	198	0.493659	0.306573
CCAACA	12	31	0.000673052	3.17195	412	281	0.0161715	-1.79125	138	153	0.0156331	1.80595
CCAACC	30	28	0.792966	0.100745	353	238	0.0184668	-1.73361	137	137	0.129406	0.888046
CCAACG	15	4	0.036335	-1.43967	135	97	0.323112	-0.490647	24	13	0.248856	-0.604051
CCAACU	19	17	1	0	272	239	0.450025	0.346764	157	113	0.271173	-0.566754
CCAAGA	27	31	0.293188	0.532854	508	486	0.0167624	1.77566	203	205	0.0523391	1.28117
CCAAGC	31	28	0.896414	0.0474915	506	263	9.7877e-10	-9.00932	178	106	0.00721056	-2.14203
CCAAGG	33	36	0.335782	0.473943	560	408	0.0703646	-1.15265	218	162	0.302764	-0.518896
CCAAGU	17	26	0.0669158	1.17447	334	259	0.509098	-0.293199	186	156	0.9567	0.0192242
CCAAUA	8	9	0.631952	0.199316	121	99	1	0	100	129	0.00109903	2.95899
CCAAUC	19	12	0.473039	-0.325103	174	123	0.220703	-0.656191	77	79	0.198472	0.7023
CCAAUG	15	11	0.844562	-0.0733682	303	234	0.488048	-0.311537	109	115	0.080833	1.09241
CCAAUU	13	19	0.156875	0.804447	145	140	0.171546	0.76562	99	129	0.000843079	3.07413
CCACAA	12	26	0.00836113	2.07774	332	250	0.317405	-0.498386	149	144	0.19721	0.70507
CCACAC	20	41	0.00117209	2.93104	371	251	0.0193476	-1.71337	175	163	0.299569	0.523504
CCACAG	35	50	0.0220391	1.65681	607	432	0.0228374	-1.64135	245	221	0.377013	0.423644
CCACAU	13	18	0.209305	0.67922	257	244	0.106114	0.974227	151	189	0.000165612	3.78091
CCACCA	38	47	0.102672	0.988548	829	439	3.91115e-14	-13.4077	253	184	0.178515	-0.748324
CCACCC	90	66	0.336405	-0.473137	683	297	3.48833e-21	-20.4574	355	188	4.15e-07	-6.38166
CCACCG	68	29	0.00146154	-2.83519	283	121	5.77038e-10	-9.2388	71	37	0.0204287	-1.68976
CCACCU	39	57	0.0103578	1.98473	646	341	1.93273e-11	-10.7138	280	207	0.219031	-0.659495
CCACGA	9	12	0.383179	0.416598	161	78	0.000116156	-3.93496	36	33	0.717643	0.144091
CCACGC	31	22	0.582012	-0.235068	206	117	0.00140428	-2.85255	49	26	0.0643071	-1.19174
CCACGG	32	21	0.4087	-0.388595	239	133	0.000312296	-3.50543	58	34	0.116316	-0.934362
CCACGU	10	13	0.403802	0.393832	135	100	0.470944	-0.327031	87	42	0.00343208	-2.46444
CCACUA	12	8	0.65768	-0.181986	158	119	0.506699	-0.29525	84	82	0.31136	0.506737
CCACUC	23	30	0.13215	0.878932	303	194	0.00679965	-2.16751	175	136	0.569484	-0.244519
CCACUG	37	63	0.000859976	3.06551	470	346	0.130235	-0.885273	270	208	0.43483	-0.361681
CCACUU	22	23	0.551415	0.258521	265	186	0.107548	-0.968396	232	141	0.00353359	-2.45178
CCAGAA	39	43	0.269378	0.569638	579	536	0.0469156	1.32868	249	225	0.38071	0.419405
CCAGAC	25	45	0.00259903	2.58519	374	299	0.756639	-0.121111	164	125	0.478872	-0.319781
CCAGAG	63	84	0.00806708	2.09328	608	511	0.696201	0.157265	259	186	0.13983	-0.854401
CCAGAU	19	29	0.0590326	1.22891	374	361	0.0287294	1.54167	158	139	0.641213	0.192998
CCAGCA	52	64	0.0620519	1.20724	984	527	8.58097e-16	-15.0665	283	214	0.321544	-0.49276
CCAGCC	121	113	0.555042	0.255674	1019	450	1.18705e-29	-28.9255	372	243	0.00351835	-2.45366
CCAGCG	73	46	0.117598	-0.929601	373	182	4.27193e-09	-8.36938	79	40	0.00989036	-2.00479
CCAGCU	66	54	0.854795	-0.068138	760	492	3.73287e-05	-4.42796	317	233	0.157744	-0.802048
CCAGGA	61	97	0.000158552	3.79983	661	661	0.000358323	3.44573	309	230	0.209851	-0.678089
CCAGGC	100	75	0.404369	-0.393223	612	401	0.000450117	-3.34667	278	255	0.258109	0.588197
CCAGGG	90	59	0.118226	-0.927286	474	362	0.313403	-0.503896	333	185	9.58e-06	-5.01846
CCAGGU	20	32	0.0359123	1.44476	317	271	0.648488	0.188098	214	140	0.0285697	-1.54409
CCAGUA	16	10	0.556012	-0.254916	250	151	0.00301967	-2.52004	127	107	0.947675	0.0233406
CCAGUC	48	29	0.138714	-0.857881	392	209	3.37549e-07	-6.47166	158	96	0.0164908	-1.78276
CCAGUG	43	47	0.290313	0.537133	577	449	0.397014	-0.401194	252	177	0.0896736	-1.04734
CCAGUU	19	27	0.103664	0.984374	384	256	0.00979059	-2.00919	228	160	0.102947	-0.987386
CCAUAA	5	9	0.190961	0.719056	94	97	0.126582	0.897627	95	122	0.00164858	2.78289
CCAUAC	4	9	0.161821	0.790964	121	112	0.392116	0.406586	63	79	0.0145471	1.83722
CCAUAG	8	11	0.360908	0.442603	98	91	0.42158	0.37512	106	105	0.213383	0.670839
CCAUAU	5	6	0.764192	0.116798	134	150	0.0102206	1.99053	99	132	0.000347499	3.45905
CCAUCA	18	20	0.515712	0.287592	460	430	0.0547857	1.26133	163	144	0.606134	0.217432
CCAUCC	34	43	0.108946	0.962787	414	324	0.529494	-0.276139	210	139	0.0408982	-1.3883
CCAUCG	20	12	0.377417	-0.423179	165	150	0.365714	0.436858	34	26	0.796326	-0.0989092
CCAUCU	19	26	0.13532	0.868637	352	287	0.936665	-0.0284155	238	191	0.734465	-0.134029
CCAUGA	12	14	0.440069	0.356479	365	279	0.38364	-0.416076	145	152	0.0474568	1.3237
CCAUGC	16	17	0.602074	0.22035	311	212	0.0387941	-1.41123	147	159	0.0216059	1.66543
CCAUGG	16	16	0.724495	0.139965	401	358	0.2581	0.588212	186	152	0.913025	-0.0395173
CCAUGU	19	22	0.351433	0.454158	238	208	0.536199	0.270674	206	189	0.337029	0.472332
CCAUUA	12	23	0.0263958	1.57847	153	110	0.29286	-0.53334	134	140	0.0599808	1.22199
CCAUUC	17	18	0.612034	0.213225	223	197	0.462259	0.335114	177	157	0.582652	0.234591
CCAUUG	12	17	0.195901	0.707963	244	226	0.194522	0.711031	177	135	0.460431	-0.336835
CCAUUU	30	31	0.521418	0.282814	199	216	0.00487132	2.31235	335	303	0.28323	0.547861
CCCAAA	24	27	0.399635	0.398336	360	273	0.337717	-0.471447	207	208	0.0544685	1.26385
CCCAAC	26	27	0.494591	0.305754	316	198	0.00294284	-2.53123	151	105	0.167545	-0.775867
CCCAAG	32	37	0.228682	0.640768	540	340	0.000126175	-3.89903	225	169	0.336466	-0.473059
CCCAAU	10	10	0.823958	0.0840949	195	138	0.186553	-0.729198	95	124	0.00107532	2.96846
CCCACA	28	46	0.00699669	2.15511	420	271	0.00193991	-2.71222	210	181	0.722394	0.141226
CCCACC	91	75	0.815637	-0.0885033	733	276	5.09524e-31	-30.2928	398	219	7.45e-07	-6.12774
CCCACG	29	20	0.476886	-0.321585	228	102	1.67098e-07	-6.77703	65	37	0.0731788	-1.13561
CCCACU	36	38	0.414847	0.382112	350	214	0.000696762	-3.15692	244	148	0.00271396	-2.5664
CCCAGA	53	58	0.216165	0.665214	585	469	0.710305	-0.148555	271	202	0.248507	-0.604661
CCCAGC	121	107	0.842152	0.0746097	1051	446	1.01131e-33	-32.9951	388	260	0.0072666	-2.13867
CCCAGG	96	100	0.196911	0.705729	712	494	0.0041434	-2.38264	414	278	0.00595305	-2.22526
CCCAGU	38	23	0.200321	-0.698274	448	268	3.51249e-05	-4.45438	205	153	0.339317	-0.469395
CCCAUA	3	7	0.203463	0.691515	101	97	0.284311	0.546206	77	90	0.0294165	1.53141
CCCAUC	24	22	0.882869	0.0541038	398	247	0.000565056	-3.24791	210	142	0.0609054	-1.21534
CCCAUG	14	18	0.289283	0.538678	377	214	1.35531e-05	-4.86796	153	168	0.0135342	1.86857
CCCAUU	9	20	0.0153522	1.81383	203	134	0.0551977	-1.25808	202	186	0.332607	0.478069
CCCCAA	35	30	1	0	494	265	1.40235e-08	-7.85314	253	162	0.0102669	-1.98856
CCCCAC	75	55	0.380622	-0.419506	654	248	1.8083e-27	-26.7427	383	178	5e-11	-10.3007
CCCCAG	99	68	0.162732	-0.788526	963	438	5.37091e-26	-25.27	390	191	9.68e-10	-9.01428
CCCCAU	23	22	0.765934	0.115808	357	195	3.60794e-06	-5.44274	199	188	0.220374	0.65684
CCCCCA	90	41	0.000592229	-3.22751	750	243	3.37124e-41	-40.4722	378	175	4.92e-11	-10.3082
CCCCCC	123	25	7.36496e-14	-13.1328	402	104	1.0849e-30	-29.9646	252	70	1.4e-18	-17.8549
CCCCCG	135	32	3.97857e-13	-12.4003	379	119	1.23207e-22	-21.9094	88	45	0.00873697	-2.05864
CCCCCU	117	51	3.5667e-05	-4.44773	466	196	3.67308e-16	-15.435	255	114	1.76e-08	-7.75531
CCCCGA	62	32	0.0223254	-1.6512	272	114	4.46015e-10	-9.35065	60	28	0.0133353	-1.875
CCCCGC	209	74	5.36336e-12	-11.2706	334	101	3.16218e-21	-20.5	119	51	5.45e-05	-4.26344
CCCCGG	196	57	7.11511e-15	-14.1478	376	171	4.90846e-11	-10.3091	79	37	0.00370056	-2.43173
CCCCGU	33	21	0.33952	-0.469134	164	59	1.12401e-08	-7.94923	66	35	0.0353955	-1.45105
CCCCUA	25	18	0.64728	-0.188908	220	83	2.96548e-10	-9.52791	112	71	0.0751453	-1.1241
CCCCUC	167	78	6.25514e-06	-5.20376	492	215	1.74231e-15	-14.7589	381	165	4.8e-13	-12.3184
CCCCUG	65	43	0.209446	-0.678927	711	369	3.38835e-13	-12.47	311	201	0.00586385	-2.23182
CCCCUU	66	30	0.0039152	-2.40725	284	144	1.74924e-06	-5.75715	287	146	9.75e-07	-6.01092
CCCGAA	29	17	0.237921	-0.623568	157	71	1.87397e-05	-4.72724	27	18	0.55	-0.259637
CCCGAC	38	13	0.00295089	-2.53005	162	80	0.00016801	-3.77466	45	19	0.0118879	-1.9249
CCCGAG	102	41	2.29922e-05	-4.63842	307	142	7.73921e-09	-8.1113	66	36	0.0463451	-1.334
CCCGAU	15	11	0.844562	-0.0733682	91	46	0.0075711	-2.12084	24	18	0.759656	-0.119383
CCCGCA	48	42	1	0	226	91	3.13546e-09	-8.5037	48	20	0.0100166	-1.99928
CCCGCC	242	87	2.0797e-13	-12.682	383	122	2.43068e-22	-21.6143	135	55	3.83e-06	-5.41675
CCCGCG	172	60	2.24591e-10	-9.64861	136	58	1.81907e-05	-4.74015	40	11	0.000601043	-3.22109
CCCGCU	77	26	1.63911e-05	-4.78539	212	102	6.69413e-06	-5.17431	61	26	0.00354882	-2.44992
CCCGGA	108	27	3.31701e-10	-9.47925	270	155	0.000362177	-3.44108	58	23	0.00238423	-2.62265
CCCGGC	221	82	8.90052e-12	-11.0506	420	166	1.02986e-16	-15.9872	86	49	0.0377642	-1.42292
CCCGGG	202	79	6.69235e-10	-9.17442	335	206	0.00101433	-2.99382	83	50	0.0812505	-1.09017
CCCGGU	33	25	0.693693	-0.158832	112	58	0.00424231	-2.3724	26	19	0.765156	-0.11625
CCCGUA	14	6	0.180347	-0.743891	57	14	1.15853e-05	-4.93609	17	13	0.856668	-0.0671875
CCCGUC	43	25	0.143923	-0.841869	161	48	4.74788e-11	-10.3235	60	34	0.0784265	-1.10554
CCCGUG	36	20	0.139947	-0.854036	167	100	0.0137414	-1.86197	84	39	0.0026585	-2.57536
CCCGUU	12	11	1	0	79	37	0.00491349	-2.30861	44	17	0.00654842	-2.18386
CCCUAA	11	19	0.0677037	1.16939	125	87	0.241457	-0.61716	104	90	0.773631	0.111466
CCCUAC	17	9	0.325465	-0.487495	262	203	0.544894	-0.263688	111	83	0.516441	-0.286979
CCCUAG	30	20	0.398426	-0.399653	120	63	0.00370795	-2.43087	111	72	0.102939	-0.98742
CCCUAU	9	13	0.285639	0.544183	148	181	0.000375693	3.42517	92	74	0.876236	-0.0573789
CCCUCA	40	39	0.574908	0.240401	471	307	0.00170138	-2.7692	257	141	6.62e-05	-4.17887
CCCUCC	208	108	1.6452e-05	-4.78378	539	267	5.20797e-12	-11.2833	449	215	1.17e-11	-10.9301
CCCUCG	71	25	5.62825e-05	-4.24963	193	98	9.45818e-05	-4.02419	79	35	0.00178999	-2.74715
CCCUCU	74	72	0.456099	0.340941	354	211	0.000228348	-3.6414	343	193	1.35e-05	-4.86829
CCCUGA	38	50	0.0537767	1.26941	476	371	0.468329	-0.329449	183	171	0.285656	0.544156
CCCUGC	105	82	0.557421	-0.253817	746	439	2.2846e-08	-7.64119	357	206	2.66e-05	-4.5743
CCCUGG	75	73	0.45879	0.338386	733	567	0.289486	-0.538372	374	245	0.00411036	-2.38612
CCCUGU	34	36	0.402793	0.394918	369	256	0.0402674	-1.39505	311	213	0.0314621	-1.50221
CCCUUA	13	13	0.699748	0.155058	95	98	0.128525	0.891011	138	95	0.167194	-0.776779
CCCUUC	59	48	0.846354	-0.0724481	423	291	0.0216972	-1.6636	308	199	0.00564857	-2.24806
CCCUUG	35	41	0.205425	0.687346	259	165	0.0110904	-1.95505	238	140	0.00111577	-2.95243
CCCUUU	45	33	0.498554	-0.302288	239	169	0.148968	-0.826907	354	200	1.05e-05	-4.97787
CCGAAA	24	14	0.259878	-0.585231	154	54	1.67366e-08	-7.77633	23	16	0.632132	-0.199192
CCGAAC	21	8	0.060789	-1.21618	114	47	4.68353e-05	-4.32943	24	9	0.0527587	-1.27771
CCGAAG	36	23	0.297281	-0.526832	167	102	0.0197485	-1.70447	29	27	0.689004	0.161779
CCGAAU	8	8	0.805917	0.0937098	76	79	0.146731	0.833479	12	20	0.0741391	1.12995
CCGACA	13	5	0.155984	-0.806921	136	82	0.0292175	-1.53436	23	18	0.876771	-0.0571139
CCGACC	33	15	0.0423828	-1.37281	153	87	0.00634081	-2.19786	40	15	0.00667219	-2.17573
CCGACG	34	11	0.0040005	-2.39789	113	45	2.73175e-05	-4.56356	7	6	1	0
CCGACU	19	12	0.473039	-0.325103	112	64	0.0228018	-1.64203	24	17	0.641623	-0.19272
CCGAGA	50	28	0.0700243	-1.15475	243	167	0.0822603	-1.08481	57	30	0.0519611	-1.28432
CCGAGC	106	46	8.24801e-05	-4.08365	261	118	3.64415e-08	-7.4384	45	22	0.0488418	-1.31121
CCGAGG	84	42	0.00408468	-2.38884	290	159	3.5201e-05	-4.45344	59	52	0.775448	0.110447
CCGAGU	28	20	0.565065	-0.247902	148	113	0.576059	-0.239533	41	34	1	0
CCGAUA	6	7	0.592154	0.227565	42	22	0.101955	-0.991593	15	10	0.689671	-0.161358
CCGAUC	22	8	0.0423537	-1.37311	68	27	0.00126787	-2.89693	13	4	0.088319	-1.05395
CCGAUG	7	10	0.336794	0.472635	120	71	0.0290959	-1.53617	23	18	0.876771	-0.0571139
CCGAUU	12	7	0.494036	-0.306241	55	39	0.534459	-0.272086	25	12	0.137261	-0.862454
CCGCAA	14	14	0.708487	0.149668	150	86	0.00873792	-2.05859	16	15	0.85723	0.0669025
CCGCAC	33	27	0.897453	-0.0469882	167	82	0.000123523	-3.90825	40	17	0.0229168	-1.63985
CCGCAG	91	56	0.0566656	-1.24668	278	146	1.03973e-05	-4.98308	68	21	2.61e-05	-4.58409
CCGCAU	12	4	0.130607	-0.884032	122	66	0.006551	-2.18369	32	20	0.333176	-0.477327
CCGCCA	110	37	1.95527e-07	-6.70879	336	129	1.6893e-14	-13.7723	58	24	0.00369616	-2.43225
CCGCCC	263	69	5.56269e-22	-21.2547	353	109	1.21715e-21	-20.9147	125	42	8.59e-08	-7.06602
CCGCCG	338	73	9.92358e-34	-33.0033	376	108	2.91483e-25	-24.5354	47	6	2.05e-07	-6.68741
CCGCCU	118	44	7.86502e-07	-6.1043	344	152	5.9953e-11	-10.2222	97	45	0.000976181	-3.01047
CCGCGA	54	22	0.0026046	-2.58426	70	42	0.128312	-0.891734	9	4	0.40586	-0.391624
CCGCGC	189	67	5.80092e-11	-10.2365	160	68	2.74273e-06	-5.56182	29	13	0.064038	-1.19356
CCGCGG	172	65	4.3301e-09	-8.3635	200	65	5.57132e-12	-11.254	31	6	0.000362621	-3.44055
CCGCGU	48	17	0.0011069	-2.95589	66	50	0.709447	-0.14908	25	8	0.0144896	-1.83894
CCGCUA	12	3	0.0663407	-1.17822	66	49	0.639806	-0.193952	16	14	1	0
CCGCUC	101	33	3.37577e-07	-6.47163	215	82	8.84999e-10	-9.05306	32	17	0.151929	-0.818358
CCGCUG	113	52	0.000160702	-3.79398	302	176	0.000274923	-3.56079	83	30	5.97e-05	-4.22421
CCGCUU	35	17	0.0524207	-1.2805	126	68	0.00485563	-2.31375	35	14	0.0210023	-1.67773
CCGGAA	48	24	0.0328503	-1.48346	158	125	0.765561	-0.11602	32	22	0.585017	-0.232831
CCGGAC	62	16	3.4372e-06	-5.4638	157	88	0.00383101	-2.41669	37	15	0.017621	-1.75397
CCGGAG	131	58	1.4944e-05	-4.82553	287	167	0.00039286	-3.40576	77	29	0.000182318	-3.73917
CCGGAU	26	8	0.00908034	-2.0419	100	66	0.184845	-0.733192	20	12	0.478194	-0.320396
CCGGCA	60	34	0.0619935	-1.20765	226	129	0.00092276	-3.03491	45	23	0.0670632	-1.17352
CCGGCC	191	64	5.44533e-12	-11.264	377	140	4.32489e-17	-16.364	103	36	3.19e-06	-5.49647
CCGGCG	137	43	7.52105e-10	-9.12372	244	100	1.32827e-09	-8.87671	31	7	0.000859928	-3.06554
CCGGCU	78	44	0.0288882	-1.53928	233	134	0.000934091	-3.02961	56	33	0.135789	-0.867135
CCGGGA	108	55	0.00159108	-2.79831	287	196	0.0491826	-1.30819	70	37	0.0255546	-1.59253
CCGGGC	200	55	3.57702e-16	-15.4465	292	131	3.59263e-09	-8.44459	70	36	0.0190893	-1.71921
CCGGGG	175	53	1.15981e-12	-11.9356	254	161	0.0102606	-1.98883	79	32	0.000394856	-3.40356
CCGGGU	57	28	0.0162679	-1.78867	113	95	0.889268	0.0509675	52	33	0.232873	-0.632881
CCGGUA	9	8	1	0	29	19	0.471624	-0.326404	11	9	1	0
CCGGUC	35	17	0.0524207	-1.2805	83	59	0.447978	-0.348744	23	18	0.876771	-0.0571139
CCGGUG	33	28	1	0	155	89	0.0068483	-2.16442	47	19	0.00647159	-2.18899
CCGGUU	18	12	0.584285	-0.233375	73	53	0.531388	-0.274588	29	9	0.00836788	-2.07738
CCGUAA	2	6	0.155442	0.80843	38	16	0.0278012	-1.55594	24	20	1	0
CCGUAC	11	2	0.0273705	-1.56272	61	21	0.000338896	-3.46993	17	3	0.00619306	-2.20809
CCGUAG	10	8	1	0	33	17	0.120324	-0.919647	30	16	0.1824	-0.738974
CCGUAU	3	2	1	0	46	41	0.746925	0.126723	26	19	0.765156	-0.11625
CCGUCA	16	15	0.858136	0.0664438	136	77	0.00882669	-2.0542	29	26	0.788073	0.103434
CCGUCC	52	20	0.00191454	-2.71794	155	59	1.93285e-07	-6.7138	58	20	0.000383258	-3.41651
CCGUCG	43	19	0.0151618	-1.81925	87	25	8.25623e-07	-6.08322	21	3	0.000835391	-3.07811
CCGUCU	16	24	0.0833105	1.0793	125	65	0.00271741	-2.56584	63	35	0.0672668	-1.1722
CCGUGA	21	12	0.297014	-0.527223	138	85	0.0370421	-1.4313	39	24	0.257517	-0.589195
CCGUGC	35	18	0.0973337	-1.01174	176	96	0.00120505	-2.919	54	25	0.017116	-1.7666
CCGUGG	49	21	0.00790384	-2.10216	248	172	0.0953601	-1.02063	102	51	0.0026246	-2.58094
CCGUGU	16	12	0.850215	-0.070471	140	111	0.79999	-0.0969154	77	29	0.000182318	-3.73917
CCGUUA	7	5	0.782121	-0.106726	35	31	0.805088	0.0941567	17	8	0.228662	-0.640806
CCGUUC	15	8	0.302283	-0.519587	96	52	0.0163775	-1.78575	36	15	0.0240678	-1.61856
CCGUUG	21	12	0.297014	-0.527223	76	43	0.0530324	-1.27546	37	15	0.017621	-1.75397
CCGUUU	11	14	0.422953	0.373708	64	43	0.332088	-0.478747	64	28	0.00445662	-2.35099
CCUAAA	13	21	0.0846748	1.07225	153	136	0.515791	0.287527	155	167	0.0216044	1.66546
CCUAAC	7	13	0.116187	0.934842	93	58	0.102423	-0.989604	87	77	0.695569	0.15766
CCUAAG	11	13	0.540117	0.267512	137	90	0.10929	-0.961418	107	96	0.62181	0.206342
CCUAAU	7	8	0.613289	0.212335	98	97	0.195803	0.708181	106	107	0.168616	0.773101
CCUACA	12	20	0.076062	1.11883	280	305	0.000648089	3.18837	110	125	0.0181768	1.74048
CCUACC	25	17	0.536709	-0.270261	290	152	5.24328e-06	-5.2804	127	72	0.0102071	-1.9911
CCUACG	9	5	0.593882	-0.2263	122	81	0.139282	-0.856105	17	12	0.712646	-0.147126
CCUACU	13	15	0.454179	0.342773	208	152	0.289552	-0.538273	113	107	0.343514	0.464055
CCUAGA	24	27	0.399635	0.398336	110	104	0.30374	0.517498	121	127	0.0739106	1.13129
CCUAGC	16	25	0.0613522	1.21217	112	59	0.00556617	-2.25444	95	60	0.10647	-0.972771
CCUAGG	27	18	0.456248	-0.340799	80	57	0.440293	-0.356258	127	84	0.111773	-0.951665
CCUAGU	13	15	0.454179	0.342773	91	67	0.523061	-0.281447	107	76	0.299855	-0.523089
CCUAUA	3	13	0.00531825	2.27423	96	119	0.00311647	2.50634	67	85	0.0113076	1.94663
CCUAUC	10	10	0.823958	0.0840949	133	87	0.104024	-0.982864	67	91	0.00231512	2.63543
CCUAUG	9	9	0.81548	0.0885867	242	234	0.0799471	1.0972	106	102	0.296755	0.527602
CCUAUU	6	15	0.02691	1.57009	100	114	0.0192952	1.71455	144	125	0.759515	0.119464
CCUCAA	12	30	0.00161435	2.792	379	320	0.732282	0.135322	178	141	0.694049	-0.15861
CCUCAC	30	39	0.0915114	1.03852	377	282	0.240373	-0.619115	214	140	0.0285697	-1.54409
CCUCAG	66	70	0.228978	0.640206	718	458	2.37703e-05	-4.62397	332	243	0.142529	-0.846097
CCUCAU	19	23	0.281785	0.550082	320	303	0.0765066	1.1163	185	183	0.0941077	1.02637
CCUCCA	61	68	0.157356	0.803116	654	393	8.77025e-07	-6.05699	277	197	0.0968615	-1.01385
CCUCCC	226	114	2.5395e-06	-5.59525	571	304	5.48781e-10	-9.2606	516	324	7.58e-05	-4.12032
CCUCCG	99	38	1.05532e-05	-4.97662	257	118	7.78055e-08	-7.10899	83	35	0.00057774	-3.23827
CCUCCU	142	95	0.0677591	-1.16903	701	435	3.69696e-06	-5.43215	382	261	0.015611	-1.80657
CCUCGA	27	17	0.365318	-0.437329	148	85	0.00839352	-2.07606	40	23	0.165918	-0.780108
CCUCGC	73	28	0.000190869	-3.71927	168	83	0.000131918	-3.8797	66	37	0.0598584	-1.22287
CCUCGG	98	41	7.86269e-05	-4.10443	283	122	8.44048e-10	-9.07363	82	49	0.0788615	-1.10314
CCUCGU	28	11	0.024829	-1.60504	135	75	0.00673032	-2.17196	62	31	0.0216379	-1.66478
CCUCUA	18	16	1	0	194	141	0.272789	-0.564173	154	102	0.0788516	-1.10319
CCUCUC	101	77	0.45258	-0.344304	407	236	1.79505e-05	-4.74592	298	217	0.14418	-0.841095
CCUCUG	53	70	0.0185598	1.73143	553	395	0.0366211	-1.43627	367	254	0.0265486	-1.57596
CCUCUU	54	54	0.441237	0.355328	338	253	0.282415	-0.549112	311	218	0.054724	-1.26182
CCUGAA	17	40	0.000288533	3.5398	490	438	0.198279	0.702724	183	209	0.0016455	2.7837
CCUGAC	28	44	0.0127288	1.89521	291	257	0.414683	0.382284	148	152	0.0720755	1.14221
CCUGAG	73	67	0.734699	0.133891	492	394	0.735625	-0.133343	263	206	0.546649	-0.262292
CCUGAU	10	18	0.0596453	1.22442	254	247	0.0593716	1.22642	140	129	0.42601	0.37058
CCUGCA	50	57	0.146744	0.833439	714	464	8.54792e-05	-4.06814	231	185	0.730431	-0.136421
CCUGCC	110	82	0.347088	-0.459561	778	441	3.12225e-10	-9.50553	440	228	3.83e-09	-8.41695
CCUGCG	87	37	0.000279615	-3.55344	258	179	0.0836895	-1.07733	79	25	1.08e-05	-4.96521
CCUGCU	52	73	0.00694813	2.15813	664	502	0.166512	-0.778554	337	207	0.000654304	-3.18422
CCUGGA	55	74	0.0131083	1.88245	789	771	0.000643047	3.19176	293	204	0.0527809	-1.27752
CCUGGC	69	88	0.0160331	1.79498	705	496	0.00829306	-2.08129	329	224	0.0234862	-1.62919
CCUGGG	102	71	0.194607	-0.710841	633	488	0.307362	-0.512349	443	320	0.0585694	-1.23233
CCUGGU	29	35	0.209594	0.678621	394	354	0.22527	0.647298	222	132	0.00230558	-2.63722
CCUGUA	10	14	0.306124	0.514103	198	189	0.13884	0.857486	215	195	0.39907	0.398951
CCUGUC	37	44	0.14858	0.82804	376	245	0.00473909	-2.32431	278	180	0.00976397	-2.01037
CCUGUG	42	56	0.0331156	1.47997	548	432	0.541863	-0.26611	367	246	0.00937444	-2.02805
CCUGUU	21	24	0.371279	0.4303	288	206	0.135689	-0.867456	322	174	3.91e-06	-5.40783
CCUUAA	11	18	0.0955431	1.0198	127	86	0.169247	-0.771479	173	138	0.732906	-0.134952
CCUUAC	12	14	0.440069	0.356479	158	173	0.00936223	2.02862	114	97	0.890093	0.0505646
CCUUAG	23	13	0.245532	-0.609892	75	89	0.0186338	1.7297	136	115	0.899232	0.0461282
CCUUAU	13	10	0.837272	-0.0771334	151	160	0.0261554	1.58244	149	139	0.343736	0.463774
CCUUCA	18	37	0.00177896	2.74983	461	438	0.0293235	1.53278	217	199	0.324767	0.488428
CCUUCC	81	67	0.869114	-0.0609232	532	336	0.000150611	-3.82214	413	259	0.000358889	-3.44504
CCUUCG	37	7	2.9859e-05	-4.52492	179	146	1	0	42	28	0.401904	-0.395878
CCUUCU	53	68	0.0286667	1.54262	421	320	0.301445	-0.520792	310	236	0.32291	-0.490918
CCUUGA	21	33	0.0293468	1.53244	196	178	0.34962	0.456404	175	126	0.224604	-0.648583
CCUUGC	42	38	0.823467	0.084354	274	213	0.554219	-0.256318	197	130	0.0453845	-1.34309
CCUUGG	36	50	0.0301587	1.52059	320	255	0.737501	-0.132237	257	167	0.0146276	-1.83483
CCUUGU	19	28	0.078608	1.10453	181	197	0.00710954	2.14816	260	172	0.0203583	-1.69126
CCUUUA	11	26	0.00442559	2.35403	142	153	0.0223332	1.65105	231	172	0.293417	-0.532515
CCUUUC	46	44	0.672576	0.172258	238	181	0.461522	-0.335807	312	230	0.180982	-0.742364
CCUUUG	37	40	0.360562	0.44302	371	296	0.726256	-0.13891	293	202	0.0421857	-1.37484
CCUUUU	45	39	1	0	203	185	0.307952	0.511517	556	306	4.39e-09	-8.35742
CGAAAA	13	8	0.516811	-0.286668	136	58	1.81907e-05	-4.74015	20	29	0.0616558	1.21003
CGAAAC	19	3	0.00207115	-2.68379	75	40	0.0307284	-1.51246	28	14	0.123822	-0.907203
CGAAAG	18	9	0.246417	-0.608329	137	62	8.0698e-05	-4.09314	27	15	0.21932	-0.658922
CGAAAU	0	7	0.00449086	2.34767	63	56	0.712734	0.147073	23	21	0.764261	0.116758
CGAACA	8	5	0.7823	-0.106627	86	59	0.316768	-0.499259	19	15	1	0
CGAACC	22	15	0.514461	-0.288648	89	42	0.00274086	-2.56211	26	5	0.000899489	-3.046
CGAACG	16	2	0.00323821	-2.48969	35	12	0.00778633	-2.10867	6	5	1	0
CGAACU	12	4	0.130607	-0.884032	83	49	0.0667757	-1.17538	29	16	0.230865	-0.636643
CGAAGA	21	11	0.215522	-0.666508	173	135	0.688662	-0.161994	36	20	0.179212	-0.746633
CGAAGC	36	19	0.103832	-0.983668	125	73	0.0220989	-1.65563	33	10	0.00336455	-2.47307
CGAAGG	24	20	1	0	120	66	0.00972402	-2.01215	42	25	0.219726	-0.658119
CGAAGU	12	8	0.65768	-0.181986	97	67	0.3077	-0.511872	31	20	0.401862	-0.395923
CGAAUA	2	5	0.260501	0.584191	38	39	0.360081	0.4436	10	18	0.0565299	1.24772
CGAAUC	10	9	1	0	60	63	0.175212	0.756437	21	16	0.869603	-0.060679
CGAAUG	10	4	0.28362	-0.547263	77	68	0.677089	0.169354	23	23	0.55599	0.254933
CGAAUU	7	2	0.191027	-0.718904	72	57	0.85995	-0.0655268	26	22	1	0
CGACAA	5	2	0.462548	-0.334843	116	67	0.0213192	-1.67123	14	17	0.367388	0.434875
CGACAC	9	4	0.405222	-0.392307	95	79	0.939416	0.0271419	21	7	0.0358869	-1.44506
CGACAG	18	11	0.457443	-0.339663	161	98	0.020716	-1.68369	27	21	0.885269	-0.0529248
CGACAU	3	4	0.710841	0.148228	101	74	0.494374	-0.305945	20	17	1	0
CGACCA	19	10	0.263986	-0.578419	105	85	0.941996	-0.025951	17	18	0.50052	0.300579
CGACCC	48	14	0.000171993	-3.76449	176	69	7.42131e-08	-7.12952	38	9	0.000207533	-3.68291
CGACCG	24	9	0.0351562	-1.454	66	25	0.000683048	-3.16555	13	1	0.00500793	-2.30034
CGACCU	15	11	0.844562	-0.0733682	157	107	0.138242	-0.859359	30	17	0.241681	-0.616757
CGACGA	20	5	0.00861645	-2.06467	132	42	1.63146e-08	-7.78742	5	6	0.560911	0.251106
CGACGC	50	9	6.63062e-07	-6.17845	81	37	0.00292931	-2.53323	7	7	0.792231	0.101148
CGACGG	30	10	0.00687458	-2.16275	105	49	0.000866929	-3.06202	11	4	0.19595	-0.707854
CGACGU	8	7	1	0	51	46	0.683611	0.165191	11	6	0.471509	-0.32651
CGACUA	3	5	0.483911	0.315235	62	39	0.195451	-0.708962	9	6	0.797975	-0.0980105
CGACUC	29	9	0.00532629	-2.27357	108	66	0.0671818	-1.17275	16	17	0.489884	0.309907
CGACUG	24	9	0.0351562	-1.454	126	67	0.00375311	-2.42561	24	20	1	0
CGACUU	15	9	0.420945	-0.375774	101	86	0.825714	0.0831704	27	19	0.65774	-0.181946
CGAGAA	24	12	0.13443	-0.871503	234	152	0.0244126	-1.61239	39	23	0.203949	-0.690479
CGAGAC	34	12	0.00717729	-2.14404	147	93	0.0515666	-1.28763	32	38	0.149919	0.824144
CGAGAG	56	28	0.0210584	-1.67657	197	114	0.00298819	-2.52459	50	18	0.00208756	-2.68036
CGAGAU	10	12	0.522824	0.281645	141	119	0.851764	0.0696808	39	27	0.53691	-0.270098
CGAGCA	41	19	0.0272074	-1.56531	175	98	0.00231285	-2.63585	37	18	0.0773627	-1.11147
CGAGCC	82	40	0.00348446	-2.45786	203	93	1.94218e-06	-5.71171	40	23	0.165918	-0.780108
CGAGCG	86	26	5.70713e-07	-6.24358	116	43	3.17273e-06	-5.49857	11	4	0.19595	-0.707854
CGAGCU	38	22	0.154921	-0.809889	212	116	0.00037433	-3.42675	33	17	0.118829	-0.925076
CGAGGA	42	19	0.0203749	-1.69091	307	203	0.0182527	-1.73867	33	27	1	0
CGAGGC	69	28	0.000694068	-3.1586	213	114	0.000189512	-3.72236	47	44	0.599338	0.222328
CGAGGG	63	31	0.0126023	-1.89955	158	110	0.197374	-0.704711	52	25	0.0289862	-1.53781
CGAGGU	21	18	1	0	118	88	0.528797	-0.276711	36	37	0.410863	0.386303
CGAGUA	4	8	0.245974	0.609111	60	40	0.316859	-0.499134	20	20	0.634537	0.197543
CGAGUC	35	11	0.00271344	-2.56648	108	78	0.417856	-0.378974	20	14	0.731258	-0.135929
CGAGUG	25	13	0.146507	-0.834143	166	125	0.480005	-0.318754	44	22	0.062862	-1.20161
CGAGUU	11	6	0.468346	-0.329433	108	74	0.234352	-0.630131	30	32	0.372209	0.429213
CGAUAA	9	3	0.159918	-0.796104	29	23	1	0	10	17	0.081431	1.08921
CGAUAC	6	6	1	0	36	38	0.294495	0.530922	9	9	0.814004	0.0893735
CGAUAG	2	3	0.667612	0.175476	29	8	0.00441161	-2.3554	14	11	1	0
CGAUAU	4	0	0.129337	-0.888278	39	33	0.906281	0.0427372	19	11	0.365125	-0.437559
CGAUCA	9	5	0.593882	-0.2263	73	38	0.0220574	-1.65645	21	9	0.100759	-0.996716
CGAUCC	17	9	0.325465	-0.487495	69	39	0.0661197	-1.17967	10	12	0.400739	0.397139
CGAUCG	10	5	0.439053	-0.357483	24	16	0.634155	-0.197804	2	1	1	0
CGAUCU	8	4	0.404274	-0.393324	63	31	0.0220971	-1.65566	27	22	1	0
CGAUGA	3	6	0.318207	0.49729	136	114	0.898905	0.0462864	20	17	1	0
CGAUGC	8	8	0.805917	0.0937098	109	56	0.00470587	-2.32736	21	20	0.754228	0.122497
CGAUGG	9	7	1	0	111	86	0.720584	-0.142316	32	18	0.202673	-0.693205
CGAUGU	10	4	0.28362	-0.547263	78	68	0.739783	0.130896	26	27	0.490689	0.309193
CGAUUA	7	2	0.191027	-0.718904	37	22	0.241652	-0.61681	12	17	0.191405	0.718048
CGAUUC	9	8	1	0	56	48	0.844234	0.0735374	31	21	0.489835	-0.30995
CGAUUG	9	3	0.159918	-0.796104	40	33	1	0	28	9	0.0122895	-1.91046
CGAUUU	9	7	1	0	51	47	0.612134	0.213154	56	22	0.00285957	-2.5437
CGCAAA	8	6	1	0	100	62	0.0828649	-1.08163	20	25	0.180288	0.744033
CGCAAC	12	11	1	0	91	62	0.290875	-0.536294	14	10	0.838434	-0.0765309
CGCAAG	15	10	0.55557	-0.255261	168	78	2.13926e-05	-4.66974	19	11	0.365125	-0.437559
CGCAAU	5	2	0.462548	-0.334843	34	26	0.797164	-0.0984523	13	18	0.206026	0.686079
CGCACA	19	12	0.473039	-0.325103	101	82	1	0	38	33	0.905308	0.0432036
CGCACC	31	18	0.199341	-0.700403	166	72	3.26425e-06	-5.48622	34	19	0.170652	-0.767889
CGCACG	31	12	0.0207193	-1.68362	77	34	0.00217554	-2.66243	13	10	1	0
CGCACU	16	18	0.492776	0.30735	58	36	0.213547	-0.670506	28	15	0.220014	-0.65755
CGCAGA	34	31	0.805144	0.0941266	151	88	0.0111062	-1.95443	44	22	0.062862	-1.20161
CGCAGC	122	44	2.9254e-07	-6.53382	315	157	1.95588e-07	-6.70866	48	23	0.0314971	-1.50173
CGCAGG	77	45	0.045308	-1.34383	174	118	0.112457	-0.949012	53	20	0.00206731	-2.68459
CGCAGU	38	15	0.00877182	-2.05691	86	63	0.511021	-0.291561	39	20	0.0888742	-1.05122
CGCAUA	1	2	0.598818	0.222705	23	11	0.16793	-0.774873	10	10	0.823045	0.0845765
CGCAUC	20	12	0.377417	-0.423179	139	92	0.112732	-0.947951	24	14	0.330482	-0.480852
CGCAUG	9	3	0.159918	-0.796104	100	52	0.00706907	-2.15064	26	25	0.673623	0.171583
CGCAUU	9	8	1	0	60	37	0.185147	-0.732484	29	21	0.672017	-0.172619
CGCCAA	25	9	0.0244837	-1.61112	177	88	9.46199e-05	-4.02402	23	12	0.234789	-0.629323
CGCCAC	60	30	0.0148848	-1.82726	278	111	2.36075e-11	-10.6269	43	31	0.561938	-0.250312
CGCCAG	76	33	0.00099487	-3.00223	277	130	8.27314e-08	-7.08233	57	26	0.010934	-1.96122
CGCCAU	43	12	0.000218047	-3.66145	127	107	0.844091	0.0736107	34	39	0.195774	0.708245
CGCCCA	47	22	0.0211123	-1.67546	228	93	4.01261e-09	-8.39657	75	29	0.000345718	-3.46128
CGCCCC	189	68	9.89226e-11	-10.0047	279	104	5.58463e-13	-12.253	100	34	2.15e-06	-5.66841
CGCCCG	186	50	1.84552e-15	-14.7339	159	64	7.16928e-07	-6.14452	35	19	0.171122	-0.766693
CGCCCU	79	34	0.000619927	-3.20766	219	107	7.70032e-06	-5.11349	70	26	0.000293902	-3.5318
CGCCGA	63	22	0.000178469	-3.74844	128	55	3.90458e-05	-4.40843	7	5	1	0
CGCCGC	396	77	7.21423e-43	-42.1418	410	110	4.90036e-30	-29.3098	45	8	5.12e-06	-5.29107
CGCCGG	135	41	4.45008e-10	-9.35163	223	78	9.98642e-12	-11.0006	35	10	0.00153845	-2.81292
CGCCGU	34	13	0.0122595	-1.91153	121	45	2.29942e-06	-5.63838	19	3	0.00229022	-2.64012
CGCCUA	5	12	0.0520981	1.28318	87	38	0.0011259	-2.9485	15	9	0.540222	-0.267428
CGCCUC	127	51	2.47609e-06	-5.60623	272	138	2.82402e-06	-5.54913	73	34	0.00474228	-2.32401
CGCCUG	82	34	0.000251389	-3.59965	303	155	1.19382e-06	-5.92306	108	44	4.06e-05	-4.39194
CGCCUU	49	24	0.0252777	-1.59726	146	100	0.178368	-0.748682	48	21	0.0150413	-1.82272
CGCGAA	18	12	0.584285	-0.233375	23	18	1	0	6	0	0.035292	-1.45232
CGCGAC	37	7	2.9859e-05	-4.52492	60	22	0.000801724	-3.09597	4	2	0.695447	-0.157736
CGCGAG	73	18	2.31918e-07	-6.63466	80	39	0.00736686	-2.13272	13	3	0.0423942	-1.37269
CGCGAU	14	3	0.0257356	-1.58947	23	15	0.518582	-0.285182	8	7	1	0
CGCGCA	46	18	0.00372961	-2.42834	85	39	0.00210995	-2.67573	9	7	1	0
CGCGCC	154	52	6.91774e-10	-9.16004	143	60	7.54773e-06	-5.12218	31	15	0.102541	-0.989101
CGCGCG	156	36	2.90963e-15	-14.5362	62	31	0.0281014	-1.55127	23	9	0.0523184	-1.28135
CGCGCU	87	32	1.9094e-05	-4.7191	109	45	6.48403e-05	-4.18815	18	8	0.168332	-0.773834
CGCGGA	84	25	6.30476e-07	-6.20033	77	36	0.00451138	-2.34569	14	6	0.185042	-0.73273
CGCGGC	180	57	2.19597e-12	-11.6584	221	75	2.84065e-12	-11.5466	27	5	0.000558177	-3.25323
CGCGGG	146	57	1.42826e-07	-6.84519	118	79	0.173722	-0.760146	32	8	0.00122387	-2.91226
CGCGGU	47	16	0.000894568	-3.04839	56	31	0.0846884	-1.07218	18	8	0.168332	-0.773834
CGCGUA	4	2	0.692885	-0.159339	10	7	0.811513	-0.0907046	7	1	0.0797035	-1.09852
CGCGUC	39	16	0.0141568	-1.84903	56	32	0.108429	-0.964855	18	2	0.00114517	-2.94113
CGCGUG	32	12	0.0146585	-1.83391	70	43	0.155904	-0.807143	29	18	0.38048	-0.419668
CGCGUU	22	6	0.0122597	-1.91152	18	11	0.46267	-0.334729	8	5	0.782649	-0.106433
CGCUAA	3	5	0.483911	0.315235	24	22	0.767717	0.114799	14	16	0.464035	0.333449
CGCUAC	12	5	0.224411	-0.648957	98	87	0.605676	0.21776	18	9	0.248338	-0.604957
CGCUAG	14	3	0.0257356	-1.58947	13	10	1	0	20	6	0.0286165	-1.54338
CGCUAU	10	1	0.0142438	-1.84637	68	42	0.151634	-0.819203	11	19	0.0651146	1.18632
CGCUCA	21	11	0.215522	-0.666508	135	73	0.00417307	-2.37954	29	18	0.38048	-0.419668
CGCUCC	106	42	1.04886e-05	-4.97928	183	84	6.37112e-06	-5.19578	53	19	0.00124775	-2.90387
CGCUCG	84	23	1.5567e-07	-6.80779	74	36	0.00951874	-2.02142	11	3	0.105101	-0.978391
CGCUCU	44	28	0.237802	-0.623784	136	77	0.00882669	-2.0542	33	32	0.536283	0.270606
CGCUGA	35	21	0.227741	-0.642558	115	96	0.94487	0.0246281	41	27	0.394506	-0.403947
CGCUGC	126	51	2.46562e-06	-5.60807	358	194	2.36663e-06	-5.62587	73	42	0.0610048	-1.21464
CGCUGG	83	32	7.21119e-05	-4.14199	247	174	0.12888	-0.889815	75	25	3.15e-05	-4.50208
CGCUGU	33	16	0.0627587	-1.20233	145	93	0.0680123	-1.16741	62	35	0.0671604	-1.17289
CGCUUA	5	4	1	0	38	17	0.0413532	-1.38349	19	16	1	0
CGCUUC	45	26	0.121562	-0.915201	152	104	0.166931	-0.777462	34	20	0.274083	-0.562118
CGCUUG	35	10	0.00140229	-2.85316	65	50	0.778903	-0.108517	28	22	0.887807	-0.0516815
CGCUUU	17	15	1	0	76	59	0.795484	-0.0993686	46	25	0.095239	-1.02119
CGGAAA	23	15	0.421758	-0.374936	155	119	0.627265	-0.202549	37	32	0.904069	0.0437985
CGGAAC	26	14	0.204001	-0.690368	103	85	1	0	27	23	1	0
CGGAAG	49	32	0.265042	-0.576685	227	146	0.021976	-1.65805	42	26	0.273307	-0.563349
CGGAAU	17	11	0.570685	-0.243604	80	57	0.440293	-0.356258	24	14	0.330482	-0.480852
CGGACA	23	10	0.0804206	-1.09463	166	74	8.9776e-06	-5.04684	34	21	0.343313	-0.46431
CGGACC	51	17	0.000374836	-3.42616	168	77	1.5225e-05	-4.81744	29	12	0.0415465	-1.38147
CGGACG	45	7	8.82661e-07	-6.05421	79	41	0.0169349	-1.77122	13	3	0.0423942	-1.37269
CGGACU	38	17	0.0295453	-1.52951	103	59	0.027092	-1.56716	39	18	0.0451346	-1.34549
CGGAGA	68	34	0.00962286	-2.0167	191	166	0.59523	0.225315	49	27	0.106141	-0.974117
CGGAGC	146	51	6.61638e-09	-8.17938	264	138	1.22903e-05	-4.91044	66	26	0.00105951	-2.97489
CGGAGG	145	54	4.48564e-08	-7.34818	288	159	5.09472e-05	-4.29288	76	27	9.41e-05	-4.02644
CGGAGU	40	14	0.00256048	-2.59168	109	74	0.234513	-0.629833	27	26	0.679365	0.167897
CGGAUA	6	1	0.132582	-0.877516	41	32	0.906524	-0.0426208	10	4	0.284863	-0.545365
CGGAUC	26	16	0.353589	-0.451501	98	68	0.310793	-0.507529	23	18	0.876771	-0.0571139
CGGAUG	16	6	0.0881501	-1.05478	129	93	0.345898	-0.461052	33	17	0.118829	-0.925076
CGGAUU	20	8	0.0862744	-1.06412	78	45	0.0695195	-1.15789	22	16	0.746199	-0.127146
CGGCAA	21	12	0.297014	-0.527223	139	70	0.000808357	-3.0924	29	11	0.0257092	-1.58991
CGGCAC	38	20	0.0864389	-1.06329	175	96	0.00145973	-2.83573	33	15	0.0588137	-1.23052
CGGCAG	116	36	1.16836e-08	-7.93242	384	181	3.10075e-10	-9.50853	61	18	3.79e-05	-4.42098
CGGCAU	15	10	0.55557	-0.255261	100	67	0.213576	-0.670448	25	24	0.667779	0.175367
CGGCCA	61	23	0.000604093	-3.2189	296	154	3.17526e-06	-5.49822	56	26	0.0143217	-1.84401
CGGCCC	150	67	5.8959e-06	-5.22945	368	152	1.58861e-13	-12.799	92	30	2.63e-06	-5.58008
CGGCCG	184	48	9.7983e-16	-15.0088	279	92	8.45001e-16	-15.0731	40	7	1.28e-05	-4.89193
CGGCCU	69	32	0.00363066	-2.44001	251	133	3.84026e-05	-4.41564	70	34	0.0101951	-1.99161
CGGCGA	75	16	1.76589e-08	-7.75304	130	53	9.93221e-06	-5.00295	12	4	0.132508	-0.877756
CGGCGC	179	52	1.26083e-13	-12.8993	253	85	4.74252e-14	-13.324	23	6	0.00820236	-2.08606
CGGCGG	384	89	9.25564e-36	-35.0336	504	156	3.43693e-30	-29.4638	34	5	2.96e-05	-4.52827
CGGCGU	36	16	0.026272	-1.58051	91	45	0.0056312	-2.2494	14	10	0.838434	-0.0765309
CGGCUA	15	13	1	0	81	57	0.393068	-0.405532	18	9	0.248338	-0.604957
CGGCUC	95	44	0.000615784	-3.21057	241	117	2.03884e-06	-5.69062	58	38	0.261548	-0.582449
CGGCUG	102	61	0.0275306	-1.56018	313	209	0.0220856	-1.65589	60	45	0.625332	-0.20389
CGGCUU	46	24	0.0544535	-1.26397	139	79	0.00955273	-2.01987	36	25	0.522357	-0.282033
CGGGAA	40	24	0.170005	-0.769539	176	155	0.5436	0.264721	46	23	0.0524634	-1.28014
CGGGAC	70	43	0.0894362	-1.04849	179	118	0.0704807	-1.15193	45	19	0.0118879	-1.9249
CGGGAG	138	63	1.96649e-05	-4.70631	311	202	0.0100003	-1.99999	89	47	0.0122904	-1.91043
CGGGAU	22	16	0.630182	-0.200534	106	76	0.372624	-0.428729	38	21	0.150543	-0.82234
CGGGCA	52	28	0.0558961	-1.25262	226	120	9.55765e-05	-4.01965	59	40	0.363814	-0.439121
CGGGCC	155	38	2.27087e-14	-13.6438	283	161	0.000192174	-3.71631	61	23	0.000913984	-3.03906
CGGGCG	160	43	2.00444e-13	-12.698	171	60	2.59011e-09	-8.58668	33	11	0.00628265	-2.20186
CGGGCU	76	30	0.000191267	-3.71836	182	103	0.00236593	-2.626	48	18	0.00290143	-2.53739
CGGGGA	101	40	1.98186e-05	-4.70293	181	134	0.39572	-0.402612	66	29	0.00374925	-2.42605
CGGGGC	172	62	6.68705e-10	-9.17477	275	150	4.94501e-05	-4.30583	72	33	0.00430696	-2.36583
CGGGGG	134	23	8.34078e-17	-16.0788	199	120	0.00808264	-2.09245	87	32	4.29e-05	-4.36784
CGGGGU	50	26	0.0383554	-1.41617	104	51	0.00270303	-2.56815	48	38	0.913839	-0.0391303
CGGGUA	15	6	0.126943	-0.896392	47	34	0.655416	-0.183483	21	18	1	0
CGGGUC	52	22	0.00486157	-2.31322	96	60	0.107407	-0.968969	37	19	0.106544	-0.972471
CGGGUG	50	19	0.00228851	-2.64045	120	86	0.362847	-0.440276	55	22	0.00283783	-2.54701
CGGGUU	19	15	0.864611	-0.063179	61	36	0.126047	-0.899466	29	19	0.470163	-0.327751
CGGUAA	8	5	0.7823	-0.106627	22	12	0.302216	-0.519683	17	16	0.730064	0.136639
CGGUAC	5	6	0.764192	0.116798	49	41	1	0	12	8	0.661346	-0.179571
CGGUAG	20	12	0.377417	-0.423179	22	12	0.302216	-0.519683	15	10	0.689671	-0.161358
CGGUAU	3	3	1	0	24	25	0.473304	0.324859	15	13	1	0
CGGUCA	14	12	1	0	92	64	0.334551	-0.475538	25	12	0.137261	-0.862454
CGGUCC	34	25	0.602755	-0.219859	91	76	0.938093	0.0277543	29	13	0.064038	-1.19356
CGGUCG	26	16	0.353589	-0.451501	25	14	0.264584	-0.577436	10	3	0.162133	-0.790127
CGGUCU	23	12	0.177118	-0.751738	56	41	0.61087	-0.214051	22	18	1	0
CGGUGA	32	11	0.00853037	-2.06903	110	73	0.181011	-0.742295	38	32	1	0
CGGUGC	50	20	0.00369799	-2.43203	158	99	0.0383833	-1.41586	44	10	5.08e-05	-4.29385
CGGUGG	69	28	0.000694068	-3.1586	241	126	3.21146e-05	-4.4933	69	41	0.103147	-0.986545
CGGUGU	17	17	0.731836	0.135586	92	65	0.37809	-0.422405	39	21	0.119983	-0.92088
CGGUUA	8	1	0.0439692	-1.35685	29	23	1	0	18	7	0.106923	-0.970928
CGGUUC	25	8	0.0135134	-1.86924	93	64	0.297465	-0.526564	24	19	1	0
CGGUUG	20	13	0.487682	-0.311863	42	39	0.579065	0.237273	31	14	0.0712616	-1.14714
CGGUUU	24	14	0.259878	-0.585231	46	34	0.655237	-0.183601	34	25	0.695936	-0.157431
CGUAAA	4	2	0.692885	-0.159339	43	22	0.080519	-1.0941	41	22	0.101102	-0.995241
CGUAAC	1	1	1	0	25	13	0.195066	-0.709819	16	16	0.600178	0.22172
CGUAAG	2	1	1	0	37	15	0.0248005	-1.60554	23	13	0.316248	-0.499973
CGUAAU	3	6	0.318207	0.49729	15	13	1	0	20	17	1	0
CGUACA	5	4	1	0	40	22	0.159857	-0.796269	18	14	1	0
CGUACC	11	5	0.317116	-0.498781	53	34	0.282262	-0.549347	18	7	0.106923	-0.970928
CGUACG	4	0	0.129337	-0.888278	28	15	0.22016	-0.657262	6	2	0.305775	-0.514597
CGUACU	2	3	0.667612	0.175476	38	24	0.371896	-0.429579	22	13	0.396949	-0.401265
CGUAGA	8	7	1	0	51	22	0.0129615	-1.88735	22	19	1	0
CGUAGC	9	4	0.405222	-0.392307	27	14	0.208779	-0.680313	25	9	0.0371536	-1.43
CGUAGG	13	3	0.0415616	-1.38131	19	11	0.463626	-0.333832	27	8	0.00982651	-2.0076
CGUAGU	2	5	0.260501	0.584191	22	18	1	0	23	24	0.465818	0.331784
CGUAUA	1	1	1	0	23	19	1	0	20	21	0.530988	0.274916
CGUAUC	2	3	0.667612	0.175476	32	27	1	0	20	18	0.871112	0.0599259
CGUAUG	6	2	0.300381	-0.522328	37	46	0.061283	1.21266	33	23	0.591998	-0.22768
CGUAUU	8	4	0.404274	-0.393324	33	31	0.616761	0.209883	34	27	0.898262	-0.0465968
CGUCAA	5	3	0.732826	-0.134999	85	61	0.454542	-0.342426	16	11	0.701638	-0.153887
CGUCAC	14	11	0.844435	-0.0734339	107	68	0.110428	-0.956922	35	20	0.222634	-0.652408
CGUCAG	21	14	0.501462	-0.299762	131	72	0.00588691	-2.23011	29	28	0.596373	0.224482
CGUCAU	10	5	0.439053	-0.357483	103	78	0.601951	-0.220439	33	23	0.591998	-0.22768
CGUCCA	13	10	0.837272	-0.0771334	127	80	0.0691736	-1.16006	32	28	0.897085	0.0471664
CGUCCC	57	25	0.00529257	-2.27633	149	59	8.75374e-07	-6.05781	56	13	4.99e-06	-5.30227
CGUCCG	43	17	0.0061443	-2.21153	60	34	0.0968175	-1.01405	11	7	0.642327	-0.192244
CGUCCU	29	18	0.307739	-0.511818	134	98	0.391866	-0.406863	82	28	2.04e-05	-4.69092
CGUCGA	8	3	0.24137	-0.617317	37	20	0.143879	-0.842003	7	3	0.364552	-0.43824
CGUCGC	42	19	0.0203749	-1.69091	75	22	5.41642e-06	-5.26629	16	2	0.00338713	-2.47017
CGUCGG	38	14	0.00520124	-2.28389	85	26	3.30406e-06	-5.48095	13	4	0.088319	-1.05395
CGUCGU	17	4	0.0146474	-1.83424	31	25	1	0	18	6	0.0629414	-1.20106
CGUCUA	6	1	0.132582	-0.877516	60	32	0.0587153	-1.23125	25	10	0.060437	-1.2187
CGUCUC	32	25	0.791039	-0.101802	125	68	0.0059236	-2.22741	59	35	0.120748	-0.918119
CGUCUG	30	18	0.248878	-0.604014	116	77	0.148816	-0.82735	58	19	0.000215819	-3.66591
CGUCUU	14	13	0.849469	0.0708523	113	75	0.163863	-0.785518	59	38	0.26186	-0.581931
CGUGAA	13	7	0.374124	-0.426985	135	102	0.55707	-0.25409	54	37	0.400368	-0.397541
CGUGAC	19	13	0.596936	-0.224072	83	59	0.447978	-0.348744	32	29	0.797405	0.0983211
CGUGAG	29	19	0.387724	-0.411477	104	71	0.254516	-0.594285	48	32	0.369761	-0.432079
CGUGAU	15	5	0.0720216	-1.14254	63	78	0.0175124	1.75665	28	26	0.684512	0.164619
CGUGCA	22	15	0.514461	-0.288648	108	91	0.886786	0.0521813	57	40	0.475515	-0.322836
CGUGCC	30	18	0.248878	-0.604014	160	79	0.0001976	-3.70421	57	33	0.111994	-0.950807
CGUGCG	44	21	0.0252638	-1.5975	92	45	0.00444357	-2.35227	22	10	0.113977	-0.943184
CGUGCU	19	14	0.728868	-0.137351	153	114	0.460643	-0.336636	48	29	0.207807	-0.682339
CGUGGA	25	20	0.88168	-0.0546889	226	199	0.494985	0.305408	65	40	0.142161	-0.84722
CGUGGC	45	20	0.0127435	-1.89471	206	167	0.917191	-0.0375401	73	37	0.0162701	-1.78861
CGUGGG	37	22	0.192177	-0.7163	140	144	0.0643251	1.19162	87	39	0.00119717	-2.92184
CGUGGU	16	7	0.14682	-0.833216	157	128	1	0	55	48	0.843334	0.0740002
CGUGUA	3	2	1	0	50	47	0.540932	0.266857	39	20	0.0888742	-1.05122
CGUGUC	20	9	0.135185	-0.86907	121	96	0.837961	-0.0767764	56	31	0.0843192	-1.07407
CGUGUG	24	16	0.526438	-0.278653	144	138	0.208822	0.680223	113	61	0.00609511	-2.21502
CGUGUU	12	7	0.494036	-0.306241	64	72	0.0704011	1.15242	79	43	0.0286972	-1.54216
CGUUAA	4	0	0.129337	-0.888278	27	18	0.550657	-0.259119	37	15	0.017621	-1.75397
CGUUAC	5	7	0.564632	0.248235	41	31	0.813004	-0.0899071	18	15	1	0
CGUUAG	6	4	0.760933	-0.118654	21	14	0.612407	-0.21296	21	17	1	0
CGUUAU	6	1	0.132582	-0.877516	37	29	0.901929	-0.0448275	23	18	0.876771	-0.0571139
CGUUCA	11	5	0.317116	-0.498781	63	63	0.283242	0.547842	41	23	0.133991	-0.872924
CGUUCC	28	14	0.120847	-0.917764	94	57	0.0722896	-1.14092	38	21	0.150543	-0.82234
CGUUCG	14	2	0.00967817	-2.01421	17	21	0.25378	0.595543	8	1	0.046348	-1.33397
CGUUCU	12	7	0.494036	-0.306241	76	58	0.728613	-0.137503	57	29	0.0304956	-1.51576
CGUUGA	6	7	0.592154	0.227565	42	31	0.724597	-0.139904	28	15	0.220014	-0.65755
CGUUGC	20	14	0.608745	-0.215565	68	53	0.785008	-0.105126	39	19	0.0641901	-1.19253
CGUUGG	28	6	0.000811273	-3.09083	53	43	1	0	41	22	0.101102	-0.995241
CGUUGU	8	4	0.404274	-0.393324	52	49	0.486295	0.3131	50	28	0.110886	-0.955124
CGUUUA	6	4	0.760933	-0.118654	35	31	0.805088	0.0941567	49	29	0.172131	-0.764141
CGUUUC	17	10	0.440787	-0.355771	66	48	0.572599	-0.242149	56	36	0.250059	-0.601958
CGUUUG	14	19	0.222502	0.652666	65	49	0.706844	-0.150676	68	24	0.000208701	-3.68047
CGUUUU	20	16	0.868728	-0.0611164	52	50	0.428017	0.368539	105	56	0.00703179	-2.15293
CUAAAA	16	20	0.31617	0.50008	173	130	0.453522	-0.343402	230	278	2.67e-05	4.57372
CUAAAC	5	10	0.126288	0.898638	106	87	1	0	108	110	0.134916	0.869937
CUAAAG	14	18	0.289283	0.538678	173	144	0.910224	0.0408517	153	129	0.904924	0.043388
CUAAAU	9	15	0.150512	0.82243	103	79	0.655874	-0.183179	203	201	0.0802982	1.09529
CUAACA	5	12	0.0520981	1.28318	104	71	0.254516	-0.594285	99	107	0.0591469	1.22807
CUAACC	10	12	0.522824	0.281645	76	59	0.795484	-0.0993686	80	80	0.266262	0.57469
CUAACG	4	4	1	0	36	13	0.00939823	-2.02695	23	18	0.876771	-0.0571139
CUAACU	7	16	0.0344566	1.46273	72	65	0.606887	0.216892	127	107	0.947675	0.0233406
CUAAGA	10	14	0.306124	0.514103	132	116	0.609997	0.214672	130	167	0.00018475	3.73342
CUAAGC	6	14	0.0421359	1.37535	88	57	0.181711	-0.740619	84	88	0.145427	0.837354
CUAAGG	12	19	0.105691	0.975962	114	81	0.349596	-0.456433	96	99	0.131607	0.880722
CUAAGU	3	9	0.077986	1.10798	81	46	0.0495361	-1.30508	120	102	0.892826	0.0492331
CUAAUA	3	5	0.483911	0.315235	59	48	1	0	119	134	0.0163452	1.78661
CUAAUC	4	14	0.00840895	2.07526	63	73	0.0474533	1.32373	71	75	0.157704	0.802158
CUAAUG	9	12	0.383179	0.416598	128	114	0.561073	0.250981	137	136	0.144826	0.839154
CUAAUU	4	11	0.0399533	1.39845	83	79	0.38518	0.414336	203	201	0.0802982	1.09529
CUACAA	6	19	0.00400068	2.39787	253	315	7.51515e-07	6.12406	114	157	4e-05	4.39746
CUACAC	8	15	0.092553	1.03361	202	181	0.41137	0.385767	80	97	0.0126421	1.89818
CUACAG	16	27	0.0322277	1.49177	363	291	0.783276	-0.106085	169	143	0.909476	0.041209
CUACAU	13	10	0.837272	-0.0771334	181	190	0.0188221	1.72533	117	122	0.0796941	1.09857
CUACCA	10	15	0.228118	0.64184	309	199	0.00743714	-2.12859	105	101	0.294776	0.530508
CUACCC	18	19	0.6215	0.206559	279	156	0.000111179	-3.95398	129	69	0.00332527	-2.47817
CUACCG	13	7	0.374124	-0.426985	111	74	0.183447	-0.736489	20	7	0.0521853	-1.28245
CUACCU	14	19	0.222502	0.652666	264	218	0.963506	0.0161457	138	126	0.458487	0.338673
CUACGA	9	2	0.0738387	-1.13172	119	83	0.25883	-0.586986	14	11	1	0
CUACGC	15	5	0.0720216	-1.14254	71	60	0.93008	0.0314798	12	8	0.661346	-0.179571
CUACGG	14	9	0.537189	-0.269873	124	54	8.0104e-05	-4.09635	19	10	0.267297	-0.573005
CUACGU	4	2	0.692885	-0.159339	62	79	0.0108769	1.9635	18	16	0.864714	0.0631274
CUACUA	6	6	1	0	120	84	0.291233	-0.535759	67	104	5.82e-05	4.23494
CUACUC	10	26	0.00219522	2.65852	169	156	0.315655	0.500787	99	97	0.251778	0.598981
CUACUG	13	16	0.356456	0.447994	260	218	0.818413	0.0870274	134	125	0.35011	0.455796
CUACUU	17	21	0.329025	0.482772	164	171	0.0320919	1.4936	170	165	0.154125	0.812127
CUAGAA	8	19	0.0187717	1.7265	132	103	0.743176	-0.128908	164	189	0.00227293	2.64341
CUAGAC	11	14	0.422953	0.373708	84	73	0.748653	0.125719	71	74	0.182292	0.739232
CUAGAG	26	25	0.779116	0.108398	130	125	0.208803	0.680262	136	118	0.75283	0.123303
CUAGAU	12	7	0.494036	-0.306241	65	47	0.569067	-0.244837	96	114	0.0102501	1.98927
CUAGCA	14	19	0.222502	0.652666	117	76	0.112169	-0.950127	77	83	0.112022	0.950695
CUAGCC	18	15	1	0	109	59	0.0103299	-1.9859	73	57	0.791705	-0.101437
CUAGCG	19	9	0.183787	-0.735686	32	19	0.324673	-0.488554	15	8	0.403183	-0.394498
CUAGCU	14	17	0.370654	0.431031	72	51	0.468715	-0.329091	118	86	0.361677	-0.441679
CUAGGA	18	14	0.860184	-0.0654088	78	71	0.564667	0.248208	124	108	0.741809	0.129708
CUAGGC	30	11	0.0176733	-1.75268	55	40	0.606769	-0.216977	105	64	0.0533554	-1.27282
CUAGGG	28	21	0.669741	-0.174093	72	44	0.135423	-0.868308	113	71	0.0752663	-1.1234
CUAGGU	5	7	0.564632	0.248235	33	27	1	0	94	74	0.756972	-0.12092
CUAGUA	2	5	0.260501	0.584191	62	29	0.0113624	-1.94453	75	79	0.145621	0.836777
CUAGUC	12	8	0.65768	-0.181986	65	42	0.244277	-0.612118	71	57	0.859634	-0.0656862
CUAGUG	13	12	1	0	132	93	0.283748	-0.547066	123	81	0.10622	-0.973793
CUAGUU	10	13	0.403802	0.393832	55	48	0.767276	0.115048	133	108	0.897106	-0.047156
CUAUAA	8	13	0.18932	0.722804	111	127	0.011006	1.95837	139	161	0.00442157	2.35442
CUAUAC	3	10	0.0470929	1.32704	80	93	0.0264242	1.578	49	76	0.000599963	3.22188
CUAUAG	6	13	0.0650653	1.18665	75	62	1	0	73	89	0.0176441	1.7534
CUAUAU	5	6	0.764192	0.116798	74	87	0.0263011	1.58003	138	140	0.103716	0.984155
CUAUCA	4	9	0.161821	0.790964	142	121	0.804292	0.0945863	82	101	0.00917906	2.0372
CUAUCC	10	11	0.663462	0.178184	122	84	0.233945	-0.630886	66	79	0.0299936	1.52297
CUAUCG	6	2	0.300381	-0.522328	36	38	0.294495	0.530922	15	9	0.540222	-0.267428
CUAUCU	9	15	0.150512	0.82243	118	113	0.261011	0.583341	113	132	0.00840982	2.07521
CUAUGA	3	8	0.127154	0.895669	235	307	7.67808e-08	7.11475	99	124	0.00241444	2.61718
CUAUGC	4	13	0.0143212	1.84402	175	125	0.246045	-0.608985	88	85	0.322099	0.492011
CUAUGG	10	12	0.522824	0.281645	227	173	0.481872	-0.317069	90	109	0.00835038	2.07829
CUAUGU	9	6	0.797085	-0.0984952	132	137	0.0574647	1.2406	130	151	0.00575115	2.24025
CUAUUA	6	10	0.216617	0.664307	72	84	0.0297819	1.52605	137	150	0.0206626	1.68482
CUAUUC	7	9	0.460215	0.337039	111	119	0.0466745	1.33092	121	109	0.551596	0.258379
CUAUUG	7	16	0.0344566	1.46273	100	113	0.0228496	1.64112	142	116	0.900677	-0.0454307
CUAUUU	13	17	0.275249	0.560274	104	113	0.0406929	1.39048	354	285	0.720632	-0.142286
CUCAAA	11	30	0.000772673	3.112	269	222	0.963846	0.0159922	217	261	6.13e-05	4.21241
CUCAAC	14	15	0.580521	0.236182	258	224	0.55195	0.2581	101	98	0.285848	0.543864
CUCAAG	25	26	0.57469	0.240566	436	340	0.493053	-0.307106	182	133	0.282253	-0.549362
CUCAAU	7	7	0.795029	0.0996171	155	153	0.109009	0.962536	105	137	0.000475481	3.32287
CUCACA	18	35	0.00534229	2.27227	253	256	0.0204437	1.68944	163	190	0.00158026	2.80127
CUCACC	35	32	0.807581	0.0928139	398	271	0.0177391	-1.75107	219	145	0.0351615	-1.45393
CUCACG	23	9	0.0500185	-1.30087	112	86	0.668624	-0.174818	54	41	0.681637	-0.166447
CUCACU	22	37	0.0126963	1.89632	230	188	1	0	195	203	0.0266202	1.57479
CUCAGA	36	55	0.0082148	2.0854	512	418	0.947452	-0.0234429	242	224	0.245046	0.610753
CUCAGC	77	50	0.130557	-0.8842	651	393	1.17298e-06	-5.93071	257	220	0.747692	0.126277
CUCAGG	49	68	0.0119593	1.9223	397	349	0.357727	0.446449	239	201	0.923718	0.0344606
CUCAGU	25	23	0.885174	0.0529713	322	262	0.933732	-0.0297779	248	192	0.472902	-0.325229
CUCAUA	9	5	0.593882	-0.2263	104	124	0.00513027	2.28986	102	116	0.0207599	1.68277
CUCAUC	29	23	0.88955	-0.0508297	354	311	0.39134	0.407445	164	135	0.953734	-0.0205727
CUCAUG	4	15	0.00488352	2.31127	244	206	0.776368	0.109932	151	159	0.0398715	1.39934
CUCAUU	18	22	0.271707	0.5659	181	203	0.00244261	2.61214	205	238	0.000481343	3.31755
CUCCAA	35	31	0.90246	0.0445718	451	333	0.150993	-0.821042	188	162	0.747501	0.126388
CUCCAC	38	40	0.426769	0.369807	482	255	8.45616e-09	-8.07283	200	160	0.750858	-0.124442
CUCCAG	83	92	0.0953715	1.02058	733	521	0.0124555	-1.90464	303	234	0.410407	-0.386785
CUCCAU	19	42	0.00044356	3.35305	314	284	0.249813	0.602385	224	192	0.767712	0.114802
CUCCCA	45	52	0.154283	0.811683	512	327	0.000394768	-3.40366	312	269	0.676901	0.169475
CUCCCC	175	75	2.16606e-07	-6.66433	529	217	3.69563e-19	-18.4323	384	192	5.04e-09	-8.29786
CUCCCG	125	75	0.0156453	-1.80562	225	127	0.00071793	-3.14392	104	55	0.0066359	-2.1781
CUCCCU	94	100	0.14952	0.825301	389	301	0.44439	-0.352236	428	263	0.000110797	-3.95547
CUCCGA	40	32	0.813685	-0.0895439	154	109	0.239692	-0.620346	26	15	0.276242	-0.558711
CUCCGC	131	50	4.31636e-07	-6.36488	204	93	1.50989e-06	-5.82106	55	31	0.0841642	-1.07487
CUCCGG	89	36	9.80939e-05	-4.00836	213	109	5.15592e-05	-4.28769	61	24	0.0014704	-2.83256
CUCCGU	21	15	0.619801	-0.207748	140	71	0.000860523	-3.06524	63	32	0.0232596	-1.6334
CUCCUA	17	24	0.119558	0.922422	233	162	0.105811	-0.97547	131	125	0.28593	0.543741
CUCCUC	162	101	0.0111663	-1.95209	628	360	4.20914e-08	-7.37581	298	222	0.234264	-0.630295
CUCCUG	66	91	0.00380849	2.41925	612	481	0.484414	-0.314783	368	292	0.584108	-0.233507
CUCCUU	69	63	0.727814	0.13798	341	247	0.13581	-0.867068	319	229	0.0942668	-1.02564
CUCGAA	7	9	0.460215	0.337039	99	54	0.0148126	-1.82937	36	26	0.612185	-0.213117
CUCGAC	19	7	0.0511362	-1.29127	101	51	0.00425343	-2.37126	21	14	0.611715	-0.213451
CUCGAG	29	15	0.130144	-0.885577	123	78	0.0765251	-1.1162	37	21	0.187391	-0.727252
CUCGAU	10	6	0.618431	-0.208709	67	39	0.0968697	-1.01381	18	21	0.335321	0.47454
CUCGCA	28	14	0.120847	-0.917764	89	66	0.572322	-0.242359	23	13	0.316248	-0.499973
CUCGCC	82	36	0.000591779	-3.22784	230	90	6.24656e-10	-9.20436	56	27	0.020322	-1.69203
CUCGCG	75	12	1.85424e-10	-9.73183	42	19	0.029038	-1.53703	23	6	0.00820236	-2.08606
CUCGCU	44	21	0.0252638	-1.5975	132	77	0.0179477	-1.74599	50	47	0.542727	0.265419
CUCGGA	44	26	0.150065	-0.823719	181	99	0.00114553	-2.94099	42	21	0.0581267	-1.23562
CUCGGC	92	39	0.000147451	-3.83135	258	111	4.87037e-09	-8.31244	71	41	0.0710349	-1.14853
CUCGGG	75	35	0.00285839	-2.54388	196	98	4.88927e-05	-4.31076	60	35	0.099821	-1.00078
CUCGGU	29	15	0.130144	-0.885577	104	49	0.00111194	-2.95392	33	29	0.898662	0.0464038
CUCGUA	6	4	0.760933	-0.118654	34	22	0.422045	-0.374641	25	7	0.00739645	-2.13098
CUCGUC	29	19	0.387724	-0.411477	111	60	0.00887282	-2.05194	36	16	0.0367348	-1.43492
CUCGUG	22	13	0.312528	-0.505111	103	88	0.827397	0.0822862	54	41	0.681637	-0.166447
CUCGUU	8	9	0.631952	0.199316	65	44	0.337151	-0.472175	49	24	0.0342443	-1.46541
CUCUAA	13	12	1	0	98	89	0.508807	0.293447	145	136	0.309165	0.509809
CUCUAC	11	20	0.0473587	1.3246	230	216	0.167505	0.775972	127	123	0.228023	0.642021
CUCUAG	24	14	0.259878	-0.585231	104	75	0.409316	-0.387942	142	117	1	0
CUCUAU	11	17	0.13297	0.876247	126	132	0.0524375	1.28036	104	127	0.00359673	2.44409
CUCUCA	36	34	0.720071	0.142625	296	240	0.896453	-0.0474725	184	177	0.169393	0.771105
CUCUCC	106	104	0.333479	0.476931	453	267	1.58627e-05	-4.79962	337	203	0.000276054	-3.55901
CUCUCG	47	19	0.00439001	-2.35753	127	67	0.00305292	-2.51528	37	33	0.810725	0.0911267
CUCUCU	65	141	1.59268e-10	9.79787	297	246	0.93129	0.0309151	334	276	0.967567	-0.0143189
CUCUGA	29	40	0.0535914	1.2709	383	347	0.192897	0.714674	264	222	0.891393	0.0499306
CUCUGC	82	70	1	0	486	377	0.411767	-0.385348	339	228	0.0143491	-1.84318
CUCUGG	56	65	0.101163	0.994979	439	409	0.0673635	1.17158	274	205	0.270708	-0.5675
CUCUGU	30	55	0.000681235	3.1667	292	266	0.23351	0.631694	338	295	0.549305	0.260186
CUCUUA	9	18	0.035035	1.4555	126	91	0.375362	-0.425549	168	139	1	0
CUCUUC	53	54	0.384304	0.415325	452	339	0.211138	-0.675433	305	237	0.463286	-0.334151
CUCUUG	26	38	0.0440266	1.35628	197	194	0.0752606	1.12343	263	172	0.0159407	-1.79749
CUCUUU	47	56	0.113362	0.945532	234	234	0.0364555	1.43824	379	286	0.227261	-0.643475
CUGAAA	22	38	0.00919087	2.03664	422	362	0.541936	0.266052	296	301	0.0136273	1.86559
CUGAAC	18	32	0.0151044	1.8209	255	234	0.220138	0.657304	149	134	0.511818	0.290885
CUGAAG	40	67	0.000888408	3.05139	614	592	0.00544226	2.26422	271	227	0.928331	0.0322972
CUGAAU	11	19	0.0677037	1.16939	232	242	0.00968668	2.01382	222	213	0.135597	0.86775
CUGACA	19	32	0.0236955	1.62533	260	255	0.0462074	1.33529	146	157	0.0281598	1.55037
CUGACC	35	38	0.348201	0.458169	330	268	0.901942	-0.0448213	177	144	0.866593	-0.0621848
CUGACG	31	16	0.107825	-0.96728	130	83	0.0737313	-1.13235	44	25	0.146747	-0.83343
CUGACU	25	45	0.00259903	2.58519	235	190	0.883845	-0.0536237	189	173	0.36962	0.432245
CUGAGA	48	74	0.00143146	2.84422	308	331	0.000715564	3.14535	237	224	0.174849	0.757337
CUGAGC	74	57	0.59912	-0.222486	451	346	0.354662	-0.450186	235	160	0.0547293	-1.26178
CUGAGG	78	67	1	0	488	342	0.025519	-1.59314	282	247	0.570227	0.243952
CUGAGU	38	37	0.643549	0.191419	259	203	0.640219	-0.193671	184	184	0.0752656	1.1234
CUGAUA	14	13	0.849469	0.0708523	148	126	0.761943	0.118077	135	137	0.100366	0.998414
CUGAUC	13	18	0.209305	0.67922	175	192	0.00629665	2.20089	110	105	0.337578	0.471626
CUGAUG	19	15	0.864611	-0.063179	427	367	0.521081	0.283095	220	157	0.147802	-0.830321
CUGAUU	11	26	0.00442559	2.35403	168	165	0.110145	0.958034	222	194	0.622511	0.205853
CUGCAA	25	32	0.144694	0.839548	403	347	0.532725	0.273497	172	191	0.00606278	2.21733
CUGCAC	31	48	0.0125333	1.90193	446	338	0.281517	-0.550495	193	170	0.598173	0.223173
CUGCAG	88	102	0.0414344	1.38264	979	703	0.00698801	-2.15565	356	253	0.0610644	-1.21421
CUGCAU	27	25	0.7831	0.106183	300	240	0.795283	-0.0994783	219	187	0.803231	0.0951596
CUGCCA	46	41	0.914484	0.0388239	630	469	0.108152	-0.965964	292	210	0.116585	-0.933357
CUGCCC	97	79	0.762496	-0.117762	818	440	3.37882e-13	-12.4712	397	208	4.93e-08	-7.30674
CUGCCG	120	39	2.43293e-08	-7.61387	304	156	1.26603e-06	-5.89755	106	22	2.52e-11	-10.598
CUGCCU	90	96	0.141733	0.84853	584	415	0.0259541	-1.58579	439	287	0.00152093	-2.81789
CUGCGA	51	12	1.06421e-05	-4.97297	170	118	0.173168	-0.761531	34	19	0.170652	-0.767889
CUGCGC	91	34	1.98069e-05	-4.70318	227	123	0.00020077	-3.6973	52	15	0.000116963	-3.93195
CUGCGG	107	48	0.000137501	-3.86169	354	213	0.000326184	-3.48654	67	31	0.00609259	-2.2152
CUGCGU	48	20	0.00699385	-2.15528	111	89	0.887188	-0.0519843	80	36	0.00198137	-2.70304
CUGCUA	19	15	0.864611	-0.063179	223	167	0.387087	-0.412191	134	134	0.140762	0.851515
CUGCUC	65	68	0.259302	0.586194	528	422	0.695594	-0.157644	286	181	0.00452463	-2.34442
CUGCUG	87	84	0.444197	0.352424	984	790	0.650179	-0.186967	462	275	1.03e-05	-4.98899
CUGCUU	29	44	0.0184664	1.73362	361	278	0.426786	-0.36979	346	238	0.0248132	-1.60532
CUGGAA	50	71	0.00616587	2.21001	534	570	1.47726e-05	4.83054	308	262	0.800723	0.0965177
CUGGAC	57	47	0.844867	-0.0732119	523	514	0.00406207	2.39125	173	122	0.178582	-0.748162
CUGGAG	78	72	0.682527	0.16588	860	1004	3.27311e-14	13.485	289	271	0.161214	0.792597
CUGGAU	18	38	0.00120366	2.9195	377	413	5.21616e-05	4.28265	184	153	1	0
CUGGCA	36	37	0.481876	0.317065	474	358	0.236261	-0.626608	219	187	0.803231	0.0951596
CUGGCC	74	70	0.559867	0.251915	733	483	0.000176188	-3.75402	288	196	0.0318547	-1.49683
CUGGCG	53	24	0.00837421	-2.07706	205	124	0.00773334	-2.11163	59	20	0.000270775	-3.56739
CUGGCU	62	68	0.186695	0.728867	487	416	0.569637	0.244402	304	205	0.0206307	-1.68549
CUGGGA	73	73	0.36229	0.440944	421	450	0.000101785	3.99232	336	308	0.219789	0.657993
CUGGGC	100	83	0.824458	-0.0838315	515	417	0.843446	-0.0739425	344	205	0.000156908	-3.80435
CUGGGG	90	62	0.193255	-0.713869	514	437	0.602079	0.220347	396	224	3.31e-06	-5.47989
CUGGGU	39	36	0.817056	0.0877481	232	228	0.0547708	1.26145	228	194	0.807066	0.0930912
CUGGUA	7	16	0.0344566	1.46273	136	119	0.615244	0.210953	126	108	0.843919	0.0736991
CUGGUC	31	30	0.700556	0.154557	273	238	0.505094	0.296628	145	123	0.902369	0.0446156
CUGGUG	41	52	0.0618162	1.2089	531	512	0.00976659	2.01026	277	144	3.84e-06	-5.41579
CUGGUU	24	25	0.567154	0.246299	186	217	0.000447444	3.34926	272	147	2.29e-05	-4.6395
CUGUAA	11	29	0.00120705	2.91828	185	117	0.0279133	-1.55419	307	247	0.732837	-0.134993
CUGUAC	10	11	0.663462	0.178184	191	156	1	0	194	123	0.0205862	-1.68642
CUGUAG	22	12	0.230747	-0.636863	141	102	0.334433	-0.475691	184	159	0.744936	0.127881
CUGUAU	8	8	0.805917	0.0937098	134	180	1.50671e-05	4.82197	308	203	0.0112402	-1.94923
CUGUCA	19	34	0.0123839	1.90714	336	274	0.967545	-0.014329	222	198	0.49264	0.307471
CUGUCC	45	40	0.91355	0.0392676	421	260	0.000289023	-3.53907	277	189	0.0404997	-1.39255
CUGUCG	22	17	0.872672	-0.0591489	121	71	0.0245414	-1.6101	52	25	0.0289862	-1.53781
CUGUCU	42	48	0.204268	0.689799	274	234	0.688227	0.162268	354	269	0.277341	-0.556986
CUGUGA	34	43	0.108946	0.962787	396	440	1.34405e-05	4.87158	357	258	0.0889969	-1.05063
CUGUGC	34	51	0.0120762	1.91807	430	353	1	0	276	214	0.4679	-0.329847
CUGUGG	54	66	0.0548151	1.2611	600	589	0.00219415	2.65873	363	227	0.000794973	-3.09965
CUGUGU	29	40	0.0535914	1.2709	318	298	0.105263	0.977724	419	304	0.0729845	-1.13677
CUGUUA	4	11	0.0399533	1.39845	151	102	0.129857	-0.886536	227	191	0.921746	0.0353888
CUGUUC	27	30	0.354049	0.450937	246	249	0.0211664	1.67435	267	178	0.0251098	-1.60016
CUGUUG	29	36	0.170652	0.767887	265	202	0.429656	-0.366879	301	166	1.81e-05	-4.74312
CUGUUU	25	37	0.0408127	1.3892	218	203	0.202979	0.692549	527	332	7.89e-05	-4.10286
CUUAAA	13	20	0.115991	0.935576	153	114	0.460643	-0.336636	309	260	0.899486	0.0460055
CUUAAC	2	6	0.155442	0.80843	74	57	0.726521	-0.138752	146	97	0.0938313	-1.02765
CUUAAG	12	26	0.00836113	2.07774	90	86	0.32533	0.487676	166	130	0.640654	-0.193376
CUUAAU	12	12	0.838368	0.0765654	88	85	0.285994	0.543643	221	178	0.763191	-0.117367
CUUACA	12	11	1	0	180	152	0.825451	0.0833087	139	133	0.24772	0.606039
CUUACC	10	19	0.0410051	1.38716	160	109	0.141419	-0.849492	103	95	0.475868	0.322514
CUUACG	3	5	0.483911	0.315235	59	32	0.0585142	-1.23274	24	20	1	0
CUUACU	13	10	0.837272	-0.0771334	128	169	5.32713e-05	4.27351	164	159	0.179727	0.745386
CUUAGA	11	16	0.182323	0.739159	93	127	0.000183857	3.73552	161	150	0.332945	0.477627
CUUAGC	17	17	0.731836	0.135586	64	50	0.850851	-0.0701463	113	90	0.778438	-0.108776
CUUAGG	16	13	1	0	40	55	0.0132146	1.87894	111	97	0.728062	0.137832
CUUAGU	13	9	0.673735	-0.171511	59	64	0.124353	0.905343	160	98	0.0174521	-1.75815
CUUAUA	2	11	0.00917131	2.03757	64	86	0.00302879	2.51873	118	132	0.0187925	1.72602
CUUAUC	8	12	0.263933	0.578506	119	131	0.0220122	1.65734	98	95	0.31146	0.506598
[truncated: 2,098 more rows]

## Sheet: Suppl. Table 1B
Hexamer	5'UTR				ORF				3'UTR
	# of hexamer in unstable mRNAs	# of hexamer in stable mRNAs	P-value	Score	# of hexamer in unstable mRNAs	# of hexamer in stable mRNAs	P-value	Score	# of hexamer in unstable mRNAs	# of hexamer in stable mRNAs	P-value	Score
AAAAAA	58	132	6.59376e-11	10.1809	586	398	9.47255e-05	-4.02353	2069	1792	0.0274723	1.5611
AAAAAC	13	34	0.000335944	3.47373	448	325	0.0104281	-1.9818	456	394	0.317167	0.498712
AAAAAG	49	48	0.477591	0.320944	627	458	0.00345961	-2.46097	601	529	0.142576	0.845952
AAAAAT	29	45	0.0102606	1.98883	415	379	0.569229	0.244713	954	869	0.00951039	2.0218
AAAACA	23	39	0.0073949	2.13107	461	411	0.786043	0.104554	568	529	0.0177852	1.74994
AAAACC	15	31	0.0044326	2.35334	401	267	0.000547315	-3.26176	296	229	0.660697	-0.179998
AAAACG	10	8	1	0	140	95	0.0579294	-1.2371	76	57	0.727446	-0.138199
AAAACT	22	33	0.0417914	1.37891	341	297	0.968355	-0.0139656	462	368	0.86148	-0.064755
AAAAGA	43	53	0.0810587	1.0912	633	545	0.792658	-0.100914	556	504	0.05938	1.22636
AAAAGC	41	34	1	0	463	297	2.79912e-05	-4.55298	300	307	0.00370712	2.43096
AAAAGG	34	39	0.198508	0.702223	432	342	0.170964	-0.767095	382	308	1	0
AAAAGT	30	30	0.520587	0.283507	329	315	0.268696	0.570738	452	369	0.860728	0.0651341
AAAATA	25	32	0.143217	0.844005	290	287	0.144172	0.84112	804	799	2.97553e-05	4.52644
AAAATC	18	33	0.00743602	2.12866	341	291	0.780181	-0.107805	357	337	0.0391831	1.4069
AAAATG	15	30	0.00650345	2.18686	469	427	0.569153	0.244771	661	541	0.816404	0.0880949
AAAATT	27	40	0.0268415	1.57119	326	329	0.0715357	1.14548	729	650	0.0653391	1.18483
AAACAA	29	35	0.16855	0.773272	321	341	0.0126563	1.89769	510	464	0.0615099	1.21105
AAACAC	8	26	0.000406632	3.3908	231	221	0.346105	0.460792	259	233	0.238324	0.622832
AAACAG	21	37	0.00788208	2.10336	441	348	0.153452	-0.814029	303	275	0.167263	0.776601
AAACAT	7	19	0.00569772	2.2443	274	284	0.0461511	1.33582	359	368	0.00131804	2.88007
AAACCA	23	34	0.0453615	1.34331	390	310	0.211279	-0.675143	335	235	0.109249	-0.961584
AAACCC	24	22	0.882589	0.0542415	342	205	1.72766e-05	-4.76254	208	209	0.0265492	1.57595
AAACCG	12	10	1	0	73	61	0.795902	-0.0991406	26	24	0.670909	0.173336
AAACCT	6	25	9.50113e-05	4.02222	388	259	0.000694479	-3.15834	268	227	0.587762	0.230798
AAACGA	15	6	0.128581	-0.890824	103	91	1	0	53	46	0.761958	0.118069
AAACGC	10	13	0.403172	0.39451	101	63	0.0347041	-1.45962	38	29	0.902377	-0.044612
AAACGG	12	10	1	0	108	77	0.184694	-0.733548	39	34	0.814064	0.0893416
AAACGT	10	4	0.283911	-0.546818	84	58	0.178533	-0.748281	81	48	0.0929143	-1.03192
AAACTA	9	14	0.208391	0.68112	159	139	1	0	246	227	0.151566	0.819397
AAACTC	19	34	0.00850424	2.07036	249	238	0.340293	0.468147	230	189	0.882813	0.0541311
AAACTG	21	31	0.0514431	1.28867	362	305	0.641465	-0.192827	429	297	0.0437688	-1.35884
AAACTT	18	32	0.01061	1.97428	272	221	0.416833	-0.380037	451	330	0.182946	-0.737676
AAAGAA	66	69	0.227345	0.643315	837	755	0.546528	0.262388	609	595	0.000939308	3.02719
AAAGAC	29	29	0.598534	0.222911	378	339	0.764588	0.116572	241	223	0.147645	0.830783
AAAGAG	41	44	0.278525	0.555136	485	405	0.501574	-0.299665	310	303	0.018383	1.73558
AAAGAT	15	18	0.382995	0.416807	372	355	0.249173	0.603498	328	276	0.623325	0.205286
AAAGCA	32	35	0.327205	0.485181	457	342	0.03045	-1.51641	381	372	0.00920429	2.03601
AAAGCC	47	38	0.913404	-0.0393371	544	323	2.61023e-08	-7.58332	228	196	0.525537	0.279397
AAAGCG	32	13	0.0244643	-1.61147	123	51	4.14671e-06	-5.3823	48	29	0.251811	-0.598926
AAAGCT	23	29	0.165128	0.782179	363	325	0.789089	0.102874	297	268	0.189545	0.722287
AAAGGA	47	57	0.076155	1.1183	507	457	0.651346	0.186188	410	356	0.30901	0.510028
AAAGGC	39	35	0.816432	0.0880799	359	253	0.00841307	-2.07505	212	184	0.479312	0.319381
AAAGGG	35	40	0.203726	0.690953	215	213	0.207831	0.68229	266	190	0.203735	-0.690934
AAAGGT	13	24	0.021372	1.67015	198	176	0.917457	0.0374143	251	175	0.143808	-0.842216
AAAGTA	12	20	0.0749423	1.12527	196	176	0.835365	0.0781236	348	289	0.719914	0.142719
AAAGTC	17	19	0.409179	0.388086	238	216	0.706854	0.15067	216	180	0.761772	0.118175
AAAGTG	31	35	0.26689	0.573668	335	312	0.43087	0.365653	383	303	0.817792	-0.0873574
AAAGTT	19	20	0.523439	0.281134	273	250	0.629746	0.200835	441	300	0.0241063	-1.61787
AAATAA	26	50	0.000509122	3.29318	244	224	0.610549	0.214279	739	719	0.000370387	3.43134
AAATAC	13	26	0.00994576	2.00236	245	205	0.670686	-0.173481	326	301	0.0916266	1.03798
AAATAG	8	22	0.00292643	2.53366	124	146	0.0172005	1.76446	287	277	0.0341476	1.46664
AAATAT	10	17	0.0835741	1.07793	236	255	0.0209716	1.67837	645	641	0.000188022	3.72579
AAATCA	15	28	0.0136778	1.86398	365	308	0.643087	-0.19173	356	323	0.132092	0.879124
AAATCC	16	27	0.0313803	1.50334	295	226	0.135514	-0.868015	209	204	0.0535992	1.27084
AAATCG	16	4	0.0236259	-1.62661	68	60	1	0	41	27	0.464963	-0.332581
AAATCT	13	17	0.273065	0.563734	285	250	1	0	333	304	0.120151	0.920273
AAATGA	14	24	0.0348164	1.45822	345	367	0.00950983	2.02183	462	416	0.103262	0.986061
AAATGC	14	28	0.00799527	2.09717	304	237	0.196	-0.707744	323	288	0.222161	0.653333
AAATGG	14	25	0.0244555	1.61162	338	345	0.0460543	1.33673	356	293	0.812745	0.0900458
AAATGT	8	21	0.00470009	2.32789	382	371	0.154374	0.811425	682	539	0.729763	-0.136818
AAATTA	14	32	0.00160465	2.79462	193	187	0.328858	0.482991	499	479	0.00685493	2.164
AAATTC	20	22	0.44024	0.35631	260	277	0.0244104	1.61242	291	305	0.00149001	2.82681
AAATTG	14	15	0.57865	0.237584	227	234	0.0840223	1.07561	423	323	0.461617	-0.335718
AAATTT	22	35	0.023108	1.63624	232	244	0.0481108	1.31776	713	534	0.199778	-0.699453
AACAAA	27	48	0.0016864	2.77304	362	346	0.243045	0.614313	473	454	0.00819213	2.0866
AACAAC	11	16	0.179569	0.745768	280	288	0.0583083	1.23427	170	152	0.369927	0.431884
AACAAG	17	17	0.731293	0.135908	373	339	0.62537	0.203863	216	166	0.680579	-0.167121
AACAAT	8	10	0.481348	0.317541	187	204	0.0331181	1.47993	229	229	0.0239468	1.62075
AACACA	16	31	0.00774229	2.11113	251	236	0.440165	0.356385	241	259	0.00138603	2.85823
AACACC	18	23	0.211114	0.675484	249	217	1	0	129	108	0.793995	0.100182
AACACG	7	7	0.793761	0.10031	57	64	0.172949	0.762083	44	35	1	0
AACACT	9	14	0.208391	0.68112	182	188	0.117926	0.928392	245	197	1	0
AACAGA	21	23	0.450152	0.346641	403	382	0.267484	0.572702	266	251	0.0767856	1.11472
AACAGC	27	36	0.0772815	1.11192	435	370	0.69763	-0.156375	182	155	0.622304	0.205998
AACAGG	20	29	0.0636722	1.19605	271	218	0.364822	-0.437919	169	155	0.26371	0.578873
AACAGT	12	23	0.0260195	1.5847	277	208	0.101235	-0.99467	250	186	0.413138	-0.383905
AACATA	6	8	0.431804	0.364713	129	155	0.00875737	2.05763	210	198	0.122552	0.91168
AACATC	12	15	0.338741	0.470132	297	269	0.704582	0.152068	148	151	0.047757	1.32096
AACATG	10	16	0.118506	0.926261	238	251	0.0413024	1.38402	254	207	0.925379	0.0336804
AACATT	13	14	0.566504	0.246797	241	221	0.641024	0.193126	384	326	0.497003	0.303641
AACCAA	14	29	0.00541224	2.26662	269	232	0.893162	-0.0490696	224	187	0.728632	0.137492
AACCAC	16	20	0.247417	0.606571	221	202	0.661204	0.179665	166	142	0.606524	0.217152
AACCAG	18	28	0.0533049	1.27323	401	370	0.470382	0.327549	195	167	0.597079	0.223969
AACCAT	6	14	0.0413641	1.38338	198	195	0.245202	0.610475	212	145	0.135962	-0.866582
AACCCA	28	38	0.063632	1.19632	260	215	0.55015	-0.259519	180	197	0.00312213	2.50555
AACCCC	23	20	1	0	219	172	0.310667	-0.507705	156	133	0.636559	0.196162
AACCCG	20	13	0.489547	-0.310205	78	70	0.934377	0.0294778	26	28	0.338137	0.470907
AACCCT	14	22	0.093003	1.0315	303	225	0.0668255	-1.17506	175	141	1	0
AACCGA	15	9	0.539827	-0.267745	83	56	0.148246	-0.829018	30	19	0.473357	-0.324811
AACCGC	17	15	1	0	71	73	0.358488	0.445526	18	11	0.576293	-0.239357
AACCGG	13	9	0.675347	-0.170473	77	69	0.93394	0.0296812	22	18	1	0
AACCGT	11	11	0.831244	0.0802714	46	42	0.914997	0.0385802	31	26	0.894738	0.0483043
AACCTA	8	9	0.630371	0.200404	122	123	0.27671	0.557975	124	117	0.243444	0.6136
AACCTC	20	25	0.231255	0.635908	264	232	0.964136	0.0158616	177	153	0.542709	0.265433
AACCTG	13	23	0.0431981	1.36453	320	348	0.00520391	2.28367	213	184	0.511744	0.290947
AACCTT	12	28	0.00236592	2.626	287	186	0.00144779	-2.83929	225	180	0.960153	-0.0176595
AACGAA	9	3	0.245698	-0.609598	100	80	0.601139	-0.221025	40	42	0.266618	0.574111
AACGAC	9	10	0.647416	0.188816	95	75	0.538867	-0.268518	15	12	1	0
AACGAG	13	17	0.273065	0.563734	101	115	0.0561676	1.25051	31	23	0.786104	-0.10452
AACGAT	5	3	0.734004	-0.134301	47	52	0.268079	0.571738	25	26	0.399251	0.398754
AACGCA	5	8	0.278822	0.554672	88	60	0.138838	-0.857493	33	27	1	0
AACGCC	14	14	0.706963	0.150603	93	66	0.203851	-0.690687	24	19	1	0
AACGCG	16	3	0.00976696	-2.01024	35	23	0.295762	-0.529058	6	6	0.776289	0.109976
AACGCT	8	11	0.359166	0.444705	68	64	0.727296	0.138289	35	26	0.797656	-0.0981844
AACGGA	16	9	0.422858	-0.373805	97	74	0.399496	-0.398487	28	29	0.353967	0.451038
AACGGC	15	9	0.539827	-0.267745	107	70	0.059771	-1.22351	20	16	1	0
AACGGG	22	13	0.31509	-0.501566	103	73	0.174369	-0.758531	34	21	0.346604	-0.460166
AACGGT	5	5	1	0	46	46	0.532396	0.273765	37	17	0.0556252	-1.25473
AACGTA	5	1	0.228395	-0.641313	39	25	0.259688	-0.585549	32	20	0.404799	-0.39276
AACGTC	10	4	0.283911	-0.546818	59	68	0.130647	0.883902	31	30	0.520438	0.283631
AACGTG	9	9	0.814749	0.0889762	130	134	0.195198	0.709525	64	60	0.417115	0.379744
AACGTT	9	4	0.405279	-0.392245	61	64	0.324863	0.4883	62	37	0.157492	-0.802741
AACTAA	13	16	0.354031	0.450959	110	90	0.670882	-0.173354	187	177	0.126659	0.897363
AACTAC	8	11	0.359166	0.444705	180	173	0.393495	0.405061	108	95	0.572349	0.242339
AACTAG	11	9	1	0	69	77	0.158356	0.800365	134	110	0.897679	0.0468787
AACTAT	6	6	0.780924	0.107391	148	146	0.320457	0.49423	197	166	0.711746	0.147675
AACTCA	12	32	0.000393835	3.40469	295	252	0.797128	-0.0984718	216	162	0.501428	-0.299791
AACTCC	29	32	0.307036	0.512811	245	226	0.57959	0.236879	178	162	0.27541	0.560021
AACTCG	9	6	0.797356	-0.0983475	70	57	0.722466	-0.141183	37	13	0.00975774	-2.01065
AACTCT	18	24	0.163812	0.785654	215	222	0.0844838	1.07323	234	193	0.84564	0.0728143
AACTGA	23	24	0.558648	0.252862	245	214	1	0	265	204	0.642363	-0.19222
AACTGC	23	20	1	0	250	237	0.388276	0.410859	189	164	0.520623	0.283477
AACTGG	30	30	0.520587	0.283507	264	311	0.000375584	3.42529	215	177	0.839157	0.0761567
AACTGT	18	21	0.338127	0.470921	203	215	0.0557473	1.25378	325	233	0.173137	-0.761611
AACTTA	4	10	0.0633997	1.19791	135	96	0.129274	-0.888489	201	170	0.676158	0.169952
AACTTC	24	23	0.770063	0.113474	281	294	0.033003	1.48145	209	176	0.681933	0.166258
AACTTG	17	21	0.258163	0.588106	209	215	0.0980205	1.00868	305	203	0.0358435	-1.44559
AACTTT	31	31	0.526324	0.278746	246	212	0.888312	-0.0514343	455	337	0.238309	-0.62286
AAGAAA	58	85	0.00134587	2.871	896	852	0.0841837	1.07477	639	609	0.00333503	2.4769
AAGAAC	24	33	0.0832564	1.07958	421	387	0.502835	0.298574	188	185	0.0606369	1.21726
AAGAAG	72	80	0.103291	0.985937	995	790	0.0412357	-1.38473	324	295	0.134704	0.870619
AAGAAT	21	25	0.30033	0.522401	432	458	0.00427489	2.36908	371	343	0.0707071	1.15054
AAGACA	32	43	0.0490731	1.30916	411	385	0.337651	0.471531	245	250	0.0098877	2.0049
AAGACC	25	29	0.275423	0.56	368	313	0.72961	-0.136909	161	128	0.95283	-0.0209847
AAGACG	26	10	0.0302693	-1.519	111	113	0.283917	0.546809	42	45	0.196397	0.706866
AAGACT	30	29	0.695427	0.157749	289	280	0.23931	0.621039	223	194	0.460027	0.337217
AAGAGA	55	49	0.844132	0.0735897	566	498	0.950988	0.0218252	330	303	0.109657	0.959963
AAGAGC	41	44	0.278525	0.555136	434	337	0.104203	-0.98212	179	161	0.326308	0.486372
AAGAGG	53	43	0.918479	-0.0369307	538	439	0.289848	-0.53783	247	182	0.382016	-0.417918
AAGAGT	20	30	0.0475495	1.32285	267	248	0.507824	0.294287	219	191	0.456187	0.340857
AAGATA	17	13	0.855788	-0.0676337	237	260	0.0118101	1.92774	230	183	0.921165	-0.0356624
AAGATC	17	22	0.201022	0.696757	315	277	0.967149	0.0145066	145	113	0.802466	-0.0955736
AAGATG	19	24	0.221199	0.655217	554	496	0.733619	0.134529	288	230	0.929592	-0.0317077
AAGATT	12	21	0.0532515	1.27367	272	274	0.103108	0.986709	294	248	0.604372	0.218695
AAGCAA	19	42	0.00042356	3.37309	374	325	0.939576	-0.0270682	297	252	0.576781	0.238989
AAGCAC	17	16	0.861728	0.0646296	307	211	0.00716884	-2.14455	197	170	0.528884	0.27664
AAGCAG	53	50	0.621419	0.206616	610	432	0.000787919	-3.10352	262	238	0.192023	0.716647
AAGCAT	13	23	0.0431981	1.36453	249	200	0.36926	-0.432668	238	247	0.00607475	2.21647
AAGCCA	33	37	0.280288	0.552396	490	351	0.00410545	-2.38664	263	211	0.963182	-0.0162916
AAGCCC	25	36	0.0404616	1.39296	464	248	1.8e-10	-9.74473	165	143	0.529016	0.276532
AAGCCG	48	31	0.259767	-0.585416	127	95	0.25346	-0.59609	37	22	0.295373	-0.529629
AAGCCT	36	41	0.20903	0.679791	449	267	4.79419e-07	-6.31928	245	199	0.961935	0.0168543
AAGCGA	13	9	0.675347	-0.170473	109	80	0.243823	-0.612925	42	28	0.472053	-0.326009
AAGCGC	30	20	0.478503	-0.320116	166	102	0.00480727	-2.3181	29	22	0.888523	-0.0513315
AAGCGG	40	27	0.392253	-0.406434	191	104	8.66678e-05	-4.06214	38	15	0.018356	-1.73622
AAGCGT	13	9	0.675347	-0.170473	67	40	0.0651362	-1.18618	32	27	0.896248	0.0475718
AAGCTA	11	15	0.242843	0.614674	155	133	0.906005	-0.0428693	172	152	0.434069	0.362442
AAGCTC	29	28	0.690507	0.160832	275	226	0.501855	-0.299422	140	123	0.495586	0.304881
AAGCTG	37	41	0.256349	0.591169	511	471	0.423907	0.37273	284	228	0.964575	-0.0156639
AAGCTT	17	29	0.025443	1.59443	263	241	0.623413	0.205224	232	178	0.654838	-0.183866
AAGGAA	47	57	0.076155	1.1183	594	552	0.31404	0.503016	464	403	0.289476	0.538387
AAGGAC	33	33	0.537733	0.269433	367	313	0.758481	-0.120055	204	145	0.258251	-0.587958
AAGGAG	60	73	0.0448864	1.34788	645	567	0.954072	0.0204188	290	193	0.0394009	-1.40449
AAGGAT	21	28	0.11703	0.931702	262	319	7.55959e-05	4.1215	215	179	0.761263	0.118465
AAGGCA	21	45	0.000293482	3.53242	348	302	0.937335	-0.0281053	203	213	0.00768803	2.11419
AAGGCC	38	24	0.30801	-0.511436	481	334	0.00122169	-2.91304	154	138	0.377616	0.42295
AAGGCG	40	15	0.00635445	-2.19692	155	104	0.0396648	-1.4016	33	36	0.226713	0.644523
AAGGCT	33	23	0.504805	-0.296877	305	261	0.800543	-0.0966153	204	164	1	0
AAGGGA	44	37	1	0	279	252	0.727956	0.137895	245	224	0.178136	0.749248
AAGGGC	32	32	0.532043	0.274053	234	162	0.0233076	-1.6325	158	117	0.504919	-0.296778
AAGGGG	39	53	0.0275873	1.55929	215	201	0.522977	0.281517	214	153	0.270223	-0.568278
AAGGGT	18	16	1	0	113	117	0.209549	0.678714	160	114	0.331063	-0.480089
AAGGTA	12	12	0.688202	0.162284	110	113	0.253819	0.595476	161	121	0.589949	-0.229185
AAGGTC	10	24	0.00514319	2.28877	200	186	0.574744	0.240526	128	82	0.110378	-0.957118
AAGGTG	24	20	1	0	350	300	0.813539	-0.0896214	194	172	0.371755	0.429743
AAGGTT	15	24	0.0543127	1.2651	144	161	0.0336902	1.4725	226	162	0.261424	-0.582655
AAGTAA	11	27	0.00284516	2.54589	152	138	0.768745	0.114218	275	269	0.0249047	1.60372
AAGTAC	6	11	0.145786	0.836284	202	179	0.918249	0.0370393	146	110	0.615271	-0.210934
AAGTAG	15	14	0.85323	0.0689341	122	95	0.414553	-0.38242	203	150	0.422477	-0.374197
AAGTAT	6	13	0.063949	1.19417	147	155	0.106614	0.972187	287	247	0.45951	0.337705
AAGTCA	13	18	0.207453	0.683081	299	260	0.96619	-0.0149377	226	178	0.841389	-0.0750033
AAGTCC	16	20	0.247417	0.606571	241	196	0.472041	-0.32602	138	110	0.949133	-0.0226728
AAGTCG	13	10	0.838206	-0.0766492	79	67	0.868587	-0.0611866	35	12	0.00811317	-2.09081
AAGTCT	18	30	0.0287164	1.54187	213	204	0.376981	0.423681	189	173	0.244746	0.611284
AAGTGA	41	38	0.735248	0.133566	281	267	0.346267	0.460588	278	247	0.272584	0.5645
AAGTGC	24	21	1	0	277	198	0.0305996	-1.51428	224	179	0.960047	-0.0177077
AAGTGG	27	32	0.239381	0.62091	316	292	0.515501	0.28777	249	158	0.0190257	-1.72066
AAGTGT	13	18	0.207453	0.683081	265	179	0.00766825	-2.1153	305	205	0.0449743	-1.34704
AAGTTA	11	14	0.322913	0.490914	160	144	0.818318	0.0870779	267	204	0.578215	-0.237911
AAGTTC	13	13	0.697861	0.156231	269	243	0.723262	0.140705	174	175	0.0407161	1.39023
AAGTTG	29	26	0.892637	0.0493252	195	195	0.204415	0.689486	263	174	0.0432842	-1.36367
AAGTTT	29	23	0.889652	-0.0507797	221	236	0.0348144	1.45824	413	283	0.0359138	-1.44474
AATAAA	22	53	2.09512e-05	4.67879	221	226	0.106885	0.971082	816	778	0.000872254	3.05936
AATAAC	8	9	0.630371	0.200404	113	124	0.0903166	1.04423	195	188	0.0807777	1.09271
AATAAG	12	25	0.0122332	1.91246	139	105	0.2754	-0.560036	216	212	0.0460762	1.33652
AATAAT	12	13	0.553692	0.256732	126	140	0.0565998	1.24718	452	413	0.0697788	1.15628
AATACA	11	23	0.0147968	1.82983	203	193	0.420517	0.376216	290	247	0.54344	0.264848
AATACC	9	8	1	0	147	146	0.292026	0.534579	124	116	0.269693	0.569131
AATACG	5	7	0.402798	0.394913	46	53	0.190417	0.720295	30	38	0.0675878	1.17013
AATACT	12	13	0.553692	0.256732	148	130	1	0	250	234	0.109417	0.960915
AATAGA	8	16	0.062922	1.2012	118	123	0.175792	0.755001	210	233	0.000809979	3.09153
AATAGC	5	10	0.123968	0.906689	78	88	0.102962	0.987325	147	130	0.468401	0.329383
AATAGG	9	8	1	0	62	66	0.288066	0.540509	151	107	0.316813	-0.499198
AATAGT	6	10	0.214114	0.669354	88	73	0.752601	-0.123435	162	165	0.0394041	1.40446
AATATA	9	14	0.208391	0.68112	100	129	0.00352921	2.45232	397	382	0.0142153	1.84724
AATATC	3	10	0.0277357	1.55696	128	148	0.0218067	1.66141	173	178	0.0240369	1.61912
AATATG	5	9	0.188051	0.725724	199	196	0.246283	0.608566	296	268	0.175312	0.756189
AATATT	12	8	0.659004	-0.181112	186	227	0.000782065	3.10676	580	501	0.270576	0.567711
AATCAA	18	20	0.419744	0.377016	216	257	0.000891472	3.04989	216	221	0.0140369	1.85273
AATCAC	10	19	0.0398698	1.39936	147	150	0.200655	0.69755	166	148	0.394586	0.403859
AATCAG	16	28	0.0223991	1.64977	302	240	0.281734	-0.550161	209	203	0.0597833	1.22342
AATCAT	9	14	0.208391	0.68112	167	141	0.775383	-0.110484	193	218	0.000722099	3.1414
AATCCA	17	20	0.327244	0.485129	295	245	0.574991	-0.240339	213	174	0.918581	0.0368826
AATCCC	22	20	0.877446	0.0567798	148	138	0.59434	0.225965	161	140	0.524001	0.280668
AATCCG	12	7	0.495561	-0.304903	54	54	0.500913	0.300238	25	22	0.771315	0.112768
AATCCT	19	24	0.221199	0.655217	238	194	0.469825	-0.328064	185	182	0.0587425	1.23105
AATCGA	7	3	0.360513	-0.443079	62	61	0.52811	0.277275	24	22	0.66014	0.180364
AATCGC	10	7	0.80993	-0.0915525	38	49	0.0850505	1.07032	25	19	0.880601	-0.0552207
AATCGG	12	4	0.131198	-0.882072	52	44	0.918683	-0.0368343	32	14	0.0548162	-1.26109
AATCGT	5	3	0.734004	-0.134301	42	37	1	0	27	27	0.494148	0.306143
AATCTA	2	6	0.154153	0.812048	108	110	0.277596	0.556586	184	146	0.911865	-0.0400696
AATCTC	16	16	0.723642	0.140476	142	141	0.311119	0.507073	158	180	0.00177447	2.75093
AATCTG	12	19	0.104203	0.982119	239	203	0.774926	-0.11074	220	203	0.170986	0.767041
AATCTT	14	19	0.221145	0.655323	189	176	0.564136	0.248616	317	225	0.153811	-0.813013
AATGAA	15	18	0.382995	0.416807	429	399	0.383969	0.415704	388	381	0.00649308	2.18755
AATGAC	6	14	0.0413641	1.38338	215	254	0.00118506	2.92626	170	168	0.0629438	1.20105
AATGAG	17	14	1	0	231	255	0.010855	1.96437	269	195	0.262635	-0.580648
AATGAT	12	15	0.338741	0.470132	219	230	0.058347	1.23398	276	220	0.928033	-0.0324367
AATGCA	7	21	0.00212018	2.67363	316	264	0.588627	-0.23016	268	231	0.471325	0.32668
AATGCC	10	16	0.118506	0.926261	258	253	0.198803	0.701578	154	154	0.0664549	1.17747
AATGCG	8	5	0.782351	-0.106599	59	39	0.188536	-0.724606	31	25	1	0
AATGCT	17	12	0.711186	-0.148017	205	187	0.685786	0.163811	265	235	0.300853	0.521646
AATGGA	15	25	0.039053	1.40835	361	358	0.0999137	1.00038	293	250	0.51752	0.286073
AATGGC	12	11	1	0	221	259	0.00156822	2.80459	165	165	0.0526156	1.27889
AATGGG	13	12	0.843616	0.0738552	216	238	0.0144195	1.84105	186	157	0.703863	0.152512
AATGGT	12	15	0.338741	0.470132	166	194	0.00697308	2.15658	216	158	0.376585	-0.424137
AATGTA	6	13	0.063949	1.19417	299	154	5.23981e-08	-7.28068	435	343	0.772965	-0.11184
AATGTC	4	12	0.0232383	1.6338	196	190	0.332416	0.478318	215	198	0.181601	0.740882
AATGTG	19	16	1	0	548	395	0.00328724	-2.48317	419	308	0.218436	-0.660676
AATGTT	9	15	0.106482	0.972722	177	209	0.00358989	2.44492	480	424	0.180691	0.743063
AATTAA	21	22	0.54153	0.266377	143	149	0.142602	0.845875	369	370	0.00343098	2.46458
AATTAC	4	17	0.00152465	2.81683	123	138	0.0470735	1.32722	172	167	0.0904083	1.04379
AATTAG	3	14	0.00278374	2.55537	88	98	0.106011	0.974651	233	193	0.807519	0.0928471
AATTAT	13	13	0.697861	0.156231	150	169	0.0247751	1.60599	388	379	0.00886361	2.05239
AATTCA	10	17	0.0835741	1.07793	347	312	0.754767	0.122187	277	297	0.000663119	3.17841
AATTCC	14	23	0.049037	1.30948	180	203	0.0138881	1.85736	200	172	0.566225	0.247011
AATTCG	3	4	0.709948	0.148773	39	33	0.906561	-0.0426031	30	19	0.473357	-0.324811
AATTCT	22	19	1	0	235	214	0.705149	0.151719	327	318	0.0193605	1.71308
AATTGA	18	15	1	0	182	197	0.0394691	1.40374	244	187	0.62807	-0.201992
AATTGC	8	10	0.481348	0.317541	147	147	0.266795	0.573822	176	154	0.471883	0.326166
AATTGG	15	16	0.590167	0.229025	146	167	0.0200487	1.69791	214	146	0.124225	-0.90579
AATTGT	13	10	0.838206	-0.0766492	108	111	0.249666	0.60264	379	315	0.702637	0.153269
AATTTA	12	18	0.14302	0.844602	145	172	0.00688069	2.16237	480	437	0.0676769	1.16956
AATTTC	25	21	1	0	142	201	1.07324e-05	4.9693	304	252	0.765265	0.116188
AATTTG	16	19	0.396691	0.401548	213	228	0.0356843	1.44752	432	316	0.197892	-0.703572
AATTTT	28	38	0.063632	1.19632	182	219	0.00158528	2.7999	843	660	0.585682	-0.232338
ACAAAA	22	45	0.000522256	3.28212	390	333	0.765539	-0.116033	500	484	0.00429674	2.36686
ACAAAC	15	27	0.0195865	1.70804	200	197	0.247381	0.606634	176	179	0.0325672	1.48722
ACAAAG	24	27	0.327699	0.484525	338	335	0.113066	0.946667	245	211	0.509606	0.292766
ACAAAT	10	17	0.0835741	1.07793	310	281	0.680213	0.167355	314	295	0.0608058	1.21606
ACAACA	17	23	0.15459	0.81082	330	329	0.100918	0.996031	175	183	0.0144278	1.8408
ACAACC	12	18	0.14302	0.844602	197	243	0.000332453	3.47827	111	102	0.37031	0.431434
ACAACG	3	7	0.202642	0.693271	93	93	0.378289	0.422176	18	17	0.734454	0.134035
ACAACT	18	13	0.720948	-0.142096	235	255	0.0184671	1.7336	131	134	0.0554084	1.25642
ACAAGA	18	29	0.0392944	1.40567	408	355	0.942172	-0.0258696	211	169	0.958889	-0.0182318
ACAAGC	16	20	0.247417	0.606571	291	217	0.0753384	-1.12298	129	110	0.696386	0.15715
ACAAGG	15	19	0.301816	0.520258	298	338	0.00110694	2.95587	161	136	0.726247	0.138916
ACAAGT	17	16	0.861728	0.0646296	257	199	0.205042	-0.688158	194	140	0.322327	-0.491704
ACAATA	6	7	0.589589	0.229451	136	157	0.0190743	1.71955	196	184	0.148427	0.828488
ACAATC	10	11	0.662715	0.178673	108	115	0.158548	0.79984	112	97	0.626553	0.203042
ACAATG	12	8	0.659004	-0.181112	251	248	0.178424	0.748548	169	171	0.0381253	1.41879
ACAATT	10	14	0.227248	0.643499	143	170	0.00765571	2.11601	203	219	0.00325416	2.48756
ACACAA	13	24	0.021372	1.67015	222	196	0.960906	0.0173192	172	201	0.000384698	3.41488
ACACAC	22	48	0.000161572	3.79163	206	161	0.295499	-0.529444	337	438	3.91588e-11	10.4072
ACACAG	20	37	0.0048553	2.31378	410	314	0.0798758	-1.09758	260	238	0.162378	0.789473
ACACAT	6	26	5.37815e-05	4.26937	189	176	0.564136	0.248616	233	194	0.770265	0.11336
ACACCA	16	28	0.0223991	1.64977	350	320	0.58775	0.230807	175	140	0.954866	-0.0200578
ACACCC	29	30	0.513916	0.289108	241	205	0.775991	-0.110143	128	134	0.0347517	1.45902
ACACCG	12	10	1	0	113	85	0.318723	-0.496586	38	25	0.449818	-0.346963
ACACCT	25	33	0.113099	0.946541	247	217	1	0	165	147	0.393206	0.40538
ACACGA	9	5	0.594164	-0.226094	62	54	1	0	45	21	0.0467537	-1.33018
ACACGC	18	16	1	0	66	74	0.150227	0.823253	31	40	0.0556666	1.25441
ACACGG	11	12	0.676541	0.169706	124	105	0.842584	-0.0743869	41	29	0.63178	-0.199434
ACACGT	8	6	1	0	54	44	0.761922	-0.118089	53	48	0.617003	0.209713
ACACTA	5	7	0.402798	0.394913	112	81	0.194836	-0.710331	133	108	1	0
ACACTC	20	20	0.636142	0.196446	133	135	0.244668	0.611422	125	104	0.842041	0.0746666
ACACTG	18	30	0.0287164	1.54187	409	296	0.0127029	-1.8961	251	189	0.50203	-0.299271
ACACTT	16	23	0.109445	0.960804	152	169	0.0334691	1.47536	248	189	0.564039	-0.248691
ACAGAA	38	44	0.183234	0.736994	484	480	0.0527265	1.27797	330	309	0.0613971	1.21185
ACAGAC	33	30	0.801339	0.0961838	282	246	1	0	175	145	0.822184	0.0850308
ACAGAG	28	55	0.000234089	3.63062	404	405	0.0569417	1.24457	227	221	0.0512184	1.29057
ACAGAT	15	10	0.689115	-0.161709	334	318	0.289255	0.538719	232	200	0.498286	0.302522
ACAGCA	24	28	0.267235	0.573106	538	442	0.336702	-0.472754	225	201	0.306114	0.514117
ACAGCC	51	47	0.686238	0.163525	466	369	0.154962	-0.809774	172	181	0.0136818	1.86386
ACAGCG	36	16	0.0359336	-1.4445	174	125	0.0930521	-1.03127	27	33	0.119381	0.923065
ACAGCT	25	32	0.143217	0.844005	380	361	0.269359	0.569668	209	221	0.00562743	2.24969
ACAGGA	28	36	0.103425	0.985373	404	303	0.0456223	-1.34082	221	178	1	0
ACAGGC	21	27	0.150884	0.821358	258	193	0.108435	-0.964829	202	171	0.639706	0.194019
ACAGGG	27	23	1	0	212	203	0.375872	0.42496	163	174	0.0116023	1.93546
ACAGGT	15	25	0.039053	1.40835	191	180	0.498801	0.302072	210	112	0.000396732	-3.4015
ACAGTA	8	13	0.188133	0.725535	157	130	0.678849	-0.168227	227	185	0.921116	0.0356854
ACAGTC	12	21	0.0532515	1.27367	218	186	0.803354	-0.0950929	127	113	0.4752	0.323124
ACAGTG	24	22	0.882589	0.0542415	462	388	0.558974	-0.252609	280	202	0.233706	-0.63133
ACAGTT	13	22	0.0605067	1.2182	250	196	0.254913	-0.593608	314	188	0.00120749	-2.91811
ACATAA	6	13	0.063949	1.19417	105	145	0.000368598	3.43345	212	210	0.0352688	1.45261
ACATAC	4	10	0.0633997	1.19791	110	103	0.631266	0.199788	155	132	0.677762	0.168923
ACATAG	7	9	0.457853	0.339274	83	85	0.31562	0.500835	160	115	0.363159	-0.439903
ACATAT	4	8	0.160843	0.793598	104	102	0.442522	0.354065	238	219	0.172291	0.763737
ACATCA	14	12	1	0	444	363	0.340875	-0.467404	188	176	0.155023	0.809604
ACATCC	12	17	0.19358	0.713139	250	252	0.117407	0.930305	129	112	0.604304	0.218745
ACATCG	10	7	0.80993	-0.0915525	112	97	0.944876	-0.024625	18	20	0.332295	0.478476
ACATCT	16	21	0.190949	0.719083	229	249	0.0192861	1.71475	206	187	0.243577	0.613363
ACATGA	8	15	0.0919743	1.03633	273	241	0.929582	0.0317121	206	172	0.756328	0.12129
ACATGC	6	10	0.214114	0.669354	192	167	0.957876	-0.0186909	158	140	0.448791	0.347956
ACATGG	10	23	0.00789631	2.10258	283	228	0.375171	-0.425771	212	150	0.22436	-0.649055
ACATGT	7	14	0.0777298	1.10941	154	154	0.253465	0.596082	258	221	0.520106	0.283908
ACATTA	9	8	1	0	129	135	0.155941	0.807041	212	210	0.0352688	1.45261
ACATTC	13	12	0.843616	0.0738552	220	172	0.287709	-0.541046	206	179	0.473229	0.324929
ACATTG	4	16	0.00267858	2.57209	179	245	5.50058e-06	5.25959	243	174	0.237346	-0.624618
ACATTT	30	29	0.695427	0.157749	222	237	0.0351845	1.45365	583	470	1	0
ACCAAA	18	26	0.0953794	1.02055	341	259	0.0858053	-1.06649	273	187	0.0912252	-1.03989
ACCAAC	8	11	0.359166	0.444705	257	241	0.445415	0.351235	107	104	0.188278	0.725201
ACCAAG	20	25	0.231255	0.635908	353	364	0.0298414	1.52518	174	165	0.140324	0.852868
ACCAAT	7	8	0.611237	0.21379	163	175	0.0637242	1.1957	139	123	0.456524	0.340537
ACCACA	14	21	0.125646	0.900852	290	259	0.830664	0.0805744	203	200	0.0451	1.34582
ACCACC	42	34	0.908534	-0.041659	423	354	0.541139	-0.266691	185	143	0.739018	-0.131345
ACCACG	8	20	0.00747872	2.12617	109	102	0.629836	0.200773	68	38	0.078327	-1.10609
ACCACT	18	20	0.419744	0.377016	208	198	0.398242	0.399853	190	132	0.197405	-0.704642
ACCAGA	23	35	0.0341513	1.46659	467	373	0.188924	-0.723712	160	170	0.0126717	1.89717
ACCAGC	34	50	0.015484	1.81012	514	408	0.146298	-0.834762	200	155	0.74877	-0.125652
ACCAGG	33	34	0.462654	0.334743	352	321	0.615466	0.210796	175	150	0.615609	0.210695
ACCAGT	16	18	0.491836	0.30818	337	264	0.190671	-0.719715	190	125	0.0790099	-1.10232
ACCATA	4	7	0.365052	0.437645	126	119	0.564802	0.248104	120	116	0.169414	0.77105
ACCATC	15	18	0.382995	0.416807	302	311	0.0471864	1.32618	162	121	0.550064	-0.259587
ACCATG	7	12	0.167231	0.776684	257	272	0.0293278	1.53272	189	162	0.591434	0.228094
ACCATT	13	16	0.354031	0.450959	187	227	0.000947036	3.02363	218	145	0.0727855	-1.13796
ACCCAA	14	26	0.017005	1.76942	229	217	0.419796	0.376961	135	128	0.193158	0.714087
ACCCAC	19	35	0.00597895	2.22337	264	211	0.334363	-0.475782	160	134	0.769393	0.113852
ACCCAG	60	66	0.152663	0.816266	448	355	0.167703	-0.775459	243	215	0.323997	0.48946
ACCCAT	6	11	0.145786	0.836284	187	148	0.381031	-0.41904	137	150	0.0105678	1.97601
ACCCCA	29	26	0.892637	0.0493252	385	274	0.00887075	-2.05204	232	206	0.336391	0.473156
ACCCCC	63	32	0.0177891	-1.74985	320	182	3.02537e-06	-5.51922	152	146	0.145053	0.838473
ACCCCG	50	39	0.750093	-0.124885	160	116	0.131435	-0.88129	59	46	0.921912	-0.0353106
ACCCCT	29	26	0.892637	0.0493252	250	179	0.0420401	-1.37634	171	138	1	0
ACCCGA	22	13	0.31509	-0.501566	95	63	0.0940097	-1.02683	15	12	1	0
ACCCGC	49	27	0.0836923	-1.07731	124	81	0.0422811	-1.37385	36	32	0.715466	0.145411
ACCCGG	63	35	0.0535082	-1.27158	151	110	0.153582	-0.813658	41	29	0.63178	-0.199434
ACCCGT	9	14	0.208391	0.68112	50	50	0.547975	0.261239	33	21	0.414993	-0.381959
ACCCTA	4	14	0.00805906	2.09372	218	136	0.00196561	-2.7065	91	85	0.36295	0.440153
ACCCTC	48	41	1	0	254	198	0.238496	-0.622519	135	124	0.317317	0.498507
ACCCTG	40	48	0.10895	0.962774	341	326	0.260414	0.584336	224	179	0.960047	-0.0177077
ACCCTT	18	16	1	0	180	171	0.454107	0.342842	202	147	0.36015	-0.443516
ACCGAA	15	9	0.539827	-0.267745	98	83	0.881612	-0.0547225	26	19	0.766806	-0.115314
ACCGAC	11	5	0.31797	-0.497613	68	78	0.114796	0.940072	15	14	0.712379	0.147289
ACCGAG	32	17	0.150948	-0.821174	157	114	0.143802	-0.842234	35	34	0.468644	0.329157
ACCGAT	4	7	0.365052	0.437645	46	38	0.827476	-0.0822446	18	13	0.857427	-0.0668028
ACCGCA	26	24	0.778139	0.108943	100	99	0.394511	0.403941	29	23	1	0
ACCGCC	58	25	0.00402579	-2.39515	170	89	6.37926e-05	-4.19523	31	15	0.105124	-0.978296
ACCGCG	55	27	0.019782	-1.70373	55	50	0.845668	0.0728003	19	6	0.0437966	-1.35856
ACCGCT	16	8	0.305715	-0.514684	107	92	0.943395	-0.0253063	34	21	0.346604	-0.460166
ACCGGA	21	13	0.395225	-0.403156	108	84	0.427141	-0.369428	31	14	0.072887	-1.13735
ACCGGC	34	18	0.125369	-0.901811	173	103	0.002038	-2.6908	30	20	0.570588	-0.243678
ACCGGG	34	18	0.125369	-0.901811	136	110	0.565436	-0.247617	21	28	0.0854062	1.06851
ACCGGT	7	5	1	0	53	38	0.400775	-0.3971	22	9	0.10303	-0.987036
ACCGTA	3	6	0.317113	0.498786	50	13	2.22702e-05	-4.65228	22	14	0.50835	-0.293837
ACCGTC	21	13	0.395225	-0.403156	75	65	1	0	31	17	0.245366	-0.610186
ACCGTG	21	10	0.150506	-0.822445	97	112	0.0519716	1.28423	56	34	0.204202	-0.689941
ACCGTT	3	4	0.709948	0.148773	43	42	0.664073	0.177784	32	21	0.492452	-0.307636
ACCTAA	8	9	0.630371	0.200404	122	115	0.60258	0.219985	131	107	0.948049	0.0231692
ACCTAC	9	9	0.814749	0.0889762	163	160	0.315584	0.500885	82	78	0.302191	0.519718
ACCTAG	10	8	1	0	92	74	0.640821	-0.193263	108	83	0.771224	-0.112819
ACCTAT	6	9	0.307768	0.511777	98	120	0.0144121	1.84127	116	106	0.380203	0.419984
ACCTCA	27	29	0.421604	0.375095	398	301	0.0579579	-1.23689	223	182	0.920409	0.0360189
ACCTCC	37	35	0.638545	0.194809	343	309	0.723928	0.140305	216	163	0.535526	-0.271219
ACCTCG	25	20	0.882154	-0.0544557	110	77	0.142709	-0.845548	47	31	0.426072	-0.370517
ACCTCT	29	31	0.368253	0.433854	276	232	0.656801	-0.182566	250	187	0.441781	-0.354793
ACCTGA	23	23	0.657621	0.182024	309	309	0.0983915	1.00704	182	180	0.0568661	1.24515
ACCTGC	31	50	0.00503123	2.29833	409	377	0.474644	0.323632	184	168	0.260199	0.584695
ACCTGG	38	35	0.726152	0.138972	425	469	0.000547892	3.26131	231	154	0.0726343	-1.13886
ACCTGT	16	24	0.0813853	1.08945	245	252	0.0722242	1.14132	239	191	0.961317	-0.0171333
ACCTTA	8	9	0.630371	0.200404	227	123	1.3436e-05	-4.87173	124	140	0.00642082	2.19241
ACCTTC	27	36	0.0772815	1.11192	330	245	0.0544055	-1.26436	183	149	0.955992	0.0195457
ACCTTG	15	22	0.10159	0.99315	196	170	0.958236	-0.0185277	200	177	0.37867	0.421739
ACCTTT	20	31	0.03518	1.4537	234	211	0.775626	0.110348	311	197	0.00839408	-2.07603
ACGAAA	7	5	1	0	89	60	0.119529	-0.922528	40	34	0.816443	0.088074
ACGAAC	8	4	0.564484	-0.248348	63	46	0.38789	-0.411292	16	11	0.704558	-0.152083
ACGAAG	13	8	0.518759	-0.285034	126	82	0.0371309	-1.43026	43	23	0.136764	-0.864029
ACGAAT	4	6	0.528288	0.277129	82	53	0.0852392	-1.06936	26	28	0.338137	0.470907
ACGACA	5	6	0.763986	0.116915	103	80	0.458909	-0.338273	20	21	0.434098	0.362412
ACGACC	16	11	0.700614	-0.154521	109	67	0.0233255	-1.63217	10	9	0.821628	0.0853247
ACGACG	10	7	0.80993	-0.0915525	73	21	1.3122e-06	-5.882	2	9	0.0154265	1.81173
ACGACT	11	8	0.820675	-0.0858289	78	88	0.102962	0.987325	19	16	1	0
ACGAGA	14	12	1	0	116	137	0.0195543	1.70876	27	17	0.45201	-0.344852
ACGAGC	20	10	0.200951	-0.69691	119	92	0.407733	-0.389624	21	22	0.443982	0.352635
ACGAGG	14	21	0.125646	0.900852	172	124	0.102977	-0.98726	45	34	0.821477	-0.0854048
ACGAGT	14	5	0.107837	-0.967232	95	70	0.310405	-0.508071	23	26	0.2524	0.597911
ACGATA	3	0	0.255156	-0.593195	21	23	0.54609	0.262735	22	14	0.50835	-0.293837
ACGATC	2	3	0.666218	0.176384	42	33	0.72871	-0.137445	12	13	0.547461	0.261647
ACGATG	4	4	1	0	101	95	0.617089	0.209652	30	26	0.789834	0.102464
ACGATT	5	7	0.402798	0.394913	42	41	0.660484	0.180138	41	16	0.011402	-1.94302
ACGCAA	4	9	0.102038	0.991239	53	37	0.34174	-0.466304	18	23	0.158246	0.800668
ACGCAC	16	5	0.0489145	-1.31056	77	56	0.298441	-0.525142	33	36	0.226713	0.644523
ACGCAG	27	21	0.885027	-0.0530435	126	82	0.0371309	-1.43026	41	36	0.731894	0.135552
ACGCAT	3	5	0.482718	0.316306	51	42	0.835537	-0.0780343	27	20	0.883582	-0.0537531
ACGCCA	15	14	0.85323	0.0689341	119	87	0.209269	-0.679295	40	27	0.539476	-0.268028
ACGCCC	41	18	0.018595	-1.7306	114	87	0.358323	-0.445726	43	39	0.657109	0.182363
ACGCCG	39	24	0.255218	-0.593089	101	73	0.224496	-0.648792	5	7	0.392429	0.406238
ACGCCT	12	30	0.000978707	3.00935	102	82	0.605213	-0.218092	54	33	0.235729	-0.627587
ACGCGA	20	5	0.00898785	-2.04634	20	16	0.868028	-0.0614662	5	8	0.269226	0.569882
ACGCGC	40	23	0.163952	-0.785284	57	30	0.0239332	-1.621	8	6	1	0
ACGCGG	38	17	0.029829	-1.52536	67	51	0.462161	-0.335207	7	9	0.452287	0.344586
ACGCGT	6	4	0.76225	-0.117903	19	18	0.869797	0.0605821	6	5	1	0
ACGCTA	2	6	0.154153	0.812048	29	42	0.0425292	1.37131	9	13	0.20072	0.697408
ACGCTC	15	16	0.590167	0.229025	69	64	0.794427	0.0999458	23	24	0.382875	0.416943
ACGCTG	33	24	0.597382	-0.223748	139	114	0.614844	-0.211235	48	45	0.467692	0.33004
ACGCTT	10	6	0.619096	-0.208242	45	47	0.405044	0.392498	36	21	0.286531	-0.542829
ACGGAA	15	12	1	0	85	91	0.198959	0.701237	33	20	0.336106	-0.473524
ACGGAC	16	12	0.85045	-0.0703511	108	69	0.0419754	-1.37701	18	21	0.262828	0.580328
ACGGAG	38	18	0.0440005	-1.35654	140	142	0.232547	0.633489	52	31	0.18721	-0.727671
ACGGAT	4	8	0.160843	0.793598	55	60	0.262158	0.581437	23	22	0.653341	0.18486
ACGGCA	19	10	0.264907	-0.576906	139	117	0.802204	-0.095715	21	23	0.363314	0.439718
ACGGCC	25	14	0.260865	-0.583585	120	103	0.893453	-0.0489284	32	26	1	0
ACGGCG	46	13	0.000201785	-3.69511	102	52	0.00154867	-2.81004	11	9	1	0
ACGGCT	18	16	1	0	129	67	0.000433478	-3.36303	24	32	0.0796248	1.09895
ACGGGA	25	21	1	0	124	116	0.605528	0.217866	36	27	0.801291	-0.0962097
ACGGGC	19	10	0.264907	-0.576906	113	100	0.945341	0.0244116	27	13	0.151943	-0.818319
ACGGGG	28	11	0.0354017	-1.45098	125	81	0.0361282	-1.44215	63	40	0.275568	-0.559772
ACGGGT	8	6	1	0	58	45	0.555319	-0.255457	24	20	1	0
ACGGTA	4	3	1	0	25	23	0.885812	0.0526582	25	15	0.427656	-0.368905
ACGGTC	11	9	1	0	49	48	0.611527	0.213584	21	12	0.384345	-0.415278
ACGGTG	16	9	0.422858	-0.373805	116	111	0.506619	0.295319	50	27	0.108086	-0.96623
ACGGTT	15	5	0.0730485	-1.13639	39	45	0.229188	0.639808	35	28	1	0
ACGTAA	9	1	0.0257716	-1.58886	26	27	0.582871	0.234427	39	19	0.0852102	-1.06951
ACGTAC	3	6	0.317113	0.498786	42	30	0.410842	-0.386325	24	19	1	0
ACGTAG	5	5	1	0	25	26	0.576081	0.239516	31	20	0.482966	-0.316083
ACGTAT	4	6	0.528288	0.277129	22	19	1	0	35	34	0.468644	0.329157
ACGTCA	12	7	0.495561	-0.304903	97	97	0.387902	0.411278	25	26	0.399251	0.398754
ACGTCC	9	9	0.814749	0.0889762	71	84	0.0641395	1.19287	23	30	0.0966976	1.01458
ACGTCG	13	5	0.157106	-0.803808	38	22	0.15406	-0.812311	10	8	1	0
ACGTCT	8	5	0.782351	-0.106599	61	72	0.0983421	1.00726	49	39	1	0
ACGTGA	15	9	0.539827	-0.267745	96	81	0.821633	-0.0853222	54	39	0.676759	-0.169566
ACGTGC	13	6	0.253955	-0.595243	105	97	0.724633	0.139882	46	37	1	0
ACGTGG	14	13	0.848574	0.0713104	138	185	0.000143276	3.84383	60	58	0.354679	0.450164
ACGTGT	11	6	0.469417	-0.328441	67	88	0.0124833	1.90367	70	51	0.647706	-0.188622
ACGTTA	3	3	1	0	41	23	0.102831	-0.987877	45	31	0.56444	-0.248382
ACGTTC	11	10	1	0	49	60	0.084301	1.07417	33	18	0.205656	-0.686858
ACGTTG	10	8	1	0	56	48	0.922139	-0.0352035	41	36	0.731894	0.135552
ACGTTT	8	6	1	0	54	55	0.443623	0.352986	73	63	0.730335	0.136478
ACTAAA	15	19	0.301816	0.520258	129	112	1	0	235	191	0.961138	0.0172141
ACTAAC	6	8	0.431804	0.364713	59	55	0.778498	0.108743	86	76	0.580625	0.236105
ACTAAG	8	11	0.359166	0.444705	80	54	0.142076	-0.847478	115	106	0.343584	0.463967
ACTAAT	9	5	0.594164	-0.226094	87	67	0.467544	-0.330178	152	159	0.0224898	1.64801
ACTACA	14	11	1	0	238	216	0.706854	0.15067	149	124	0.807808	0.0926919
ACTACC	9	4	0.405279	-0.392245	169	164	0.350877	0.454845	88	61	0.410005	-0.387211
ACTACG	4	4	1	0	60	66	0.211716	0.674246	20	20	0.527198	0.278026
ACTACT	7	12	0.167231	0.776684	152	145	0.485305	0.313986	130	107	0.896123	0.0476326
ACTAGA	12	15	0.338741	0.470132	92	90	0.458451	0.338707	166	94	0.00599207	-2.22242
ACTAGC	7	9	0.457853	0.339274	68	48	0.265242	-0.576358	68	55	1	0
ACTAGG	14	16	0.465677	0.331915	39	32	0.812983	-0.0899183	97	82	0.764058	0.116874
ACTAGT	6	5	1	0	58	45	0.555319	-0.255457	94	99	0.0700835	1.15438
ACTATA	4	5	0.740748	0.13033	100	103	0.260532	0.584139	150	131	0.509779	0.292618
ACTATC	6	11	0.145786	0.836284	93	102	0.131525	0.880993	75	60	1	0
ACTATG	8	6	1	0	162	186	0.0115479	1.9375	134	126	0.235853	0.627358
ACTATT	7	5	1	0	100	111	0.0849461	1.07086	240	202	0.666893	0.175944
ACTCAA	10	16	0.118506	0.926261	174	199	0.0108958	1.96274	160	141	0.45141	0.345429
ACTCAC	17	28	0.0352166	1.45325	214	140	0.00766054	-2.11574	122	94	0.784366	-0.105481
ACTCAG	23	37	0.0189269	1.72292	297	300	0.0847988	1.07161	212	186	0.419879	0.376876
ACTCAT	15	8	0.305002	-0.515697	170	130	0.271515	-0.566207	161	151	0.19038	0.720379
ACTCCA	21	25	0.30033	0.522401	313	270	0.868214	-0.0613733	222	180	0.960029	0.0177156
ACTCCC	31	30	0.609808	0.214807	231	179	0.23483	-0.629247	160	124	0.765531	-0.116037
ACTCCG	31	21	0.487493	-0.312031	88	78	0.938168	0.0277193	26	21	1	0
ACTCCT	26	30	0.283607	0.547283	290	216	0.0747055	-1.12665	207	182	0.414542	0.382431
ACTCGA	9	7	1	0	62	51	0.777768	-0.10915	27	15	0.278948	-0.554476
ACTCGC	24	15	0.422593	-0.374078	87	58	0.114017	-0.943032	20	20	0.527198	0.278026
ACTCGG	35	24	0.436907	-0.359611	130	79	0.0102686	-1.98849	42	19	0.0388397	-1.41072
ACTCGT	8	3	0.244164	-0.612318	50	37	0.454001	-0.342943	36	18	0.101592	-0.993141
ACTCTA	8	11	0.359166	0.444705	111	122	0.0877176	1.05691	120	118	0.133726	0.873783
ACTCTC	21	27	0.150884	0.821358	157	156	0.281718	0.550186	136	116	0.657981	0.181786
ACTCTG	30	28	0.792413	0.101048	303	270	0.834259	0.0786989	232	222	0.0727316	1.13828
ACTCTT	20	24	0.289951	0.537675	137	172	0.00167803	2.7752	257	226	0.359976	0.443726
ACTGAA	30	37	0.141139	0.850354	284	253	0.862654	0.0641632	305	264	0.399382	0.398612
ACTGAC	21	19	0.874734	0.0581239	136	161	0.010386	1.98355	147	109	0.529846	-0.27585
ACTGAG	40	48	0.10895	0.962774	228	214	0.474677	0.323602	226	175	0.725155	-0.139569
ACTGAT	23	12	0.179348	-0.746304	162	147	0.775665	0.110326	195	167	0.597079	0.223969
ACTGCA	29	33	0.253647	0.595771	327	312	0.284356	0.546137	280	240	0.508199	0.293966
ACTGCC	31	35	0.26689	0.573668	292	263	0.733812	0.134415	197	129	0.0661584	-1.17941
ACTGCG	33	20	0.27084	-0.567288	116	87	0.29168	-0.535094	43	26	0.276412	-0.558443
ACTGCT	23	23	0.657621	0.182024	270	257	0.337083	0.472263	239	188	0.807878	-0.092654
ACTGGA	32	35	0.327205	0.485181	527	460	0.974553	-0.0111946	221	211	0.0815159	1.08876
ACTGGC	36	28	0.802355	-0.0956332	246	216	1	0	157	104	0.120076	-0.920545
ACTGGG	32	40	0.123533	0.908216	279	275	0.172885	0.762242	200	159	0.915493	-0.0383448
ACTGGT	15	19	0.301816	0.520258	174	186	0.0643096	1.19172	209	126	0.00974852	-2.01106
ACTGTA	8	15	0.0919743	1.03633	159	122	0.282265	-0.549342	311	216	0.0958361	-1.01847
ACTGTC	10	18	0.0581057	1.23578	183	173	0.489896	0.309896	206	141	0.144744	-0.8394
ACTGTG	31	30	0.609808	0.214807	334	393	6.80822e-05	4.16697	351	248	0.118225	-0.927291
ACTGTT	20	14	0.610492	-0.21432	168	154	0.695967	0.157411	322	229	0.157214	-0.803508
ACTTAA	9	17	0.0502745	1.29865	116	122	0.172336	0.763624	286	206	0.220973	-0.655662
ACTTAC	10	7	0.80993	-0.0915525	158	83	0.000132114	-3.87905	111	93	0.832736	0.0794925
ACTTAG	11	9	1	0	63	68	0.254968	0.593515	135	125	0.288898	0.539256
ACTTAT	5	7	0.402798	0.394913	111	84	0.350804	-0.454935	176	159	0.322534	0.491425
ACTTCA	15	35	0.000895055	3.04815	336	372	0.00198511	2.70221	253	201	0.887452	-0.0518549
ACTTCC	54	33	0.16161	-0.791532	272	256	0.407489	0.389884	192	172	0.31705	0.498872
ACTTCG	15	12	1	0	106	91	0.9431	-0.0254423	39	24	0.313249	-0.504111
ACTTCT	35	26	0.700248	-0.154748	274	240	1	0	273	217	0.891611	-0.0498248
ACTTGA	20	26	0.182436	0.738889	173	161	0.583722	0.233794	287	199	0.110143	-0.958043
ACTTGC	12	14	0.43702	0.359499	164	156	0.466696	0.330966	161	146	0.329082	0.482696
ACTTGG	31	26	1	0	212	225	0.0441046	1.35552	269	153	0.000498797	-3.30208
ACTTGT	18	22	0.26885	0.570491	159	125	0.373119	-0.428153	259	195	0.479116	-0.319559
ACTTTA	9	16	0.073714	1.13245	169	125	0.16077	-0.793794	328	269	0.83704	0.0772536
ACTTTC	22	23	0.55021	0.259472	192	179	0.567116	0.246328	223	209	0.121556	0.915223
ACTTTG	30	28	0.792413	0.101048	274	283	0.0508094	1.29406	425	299	0.0726779	-1.1386
ACTTTT	39	42	0.315692	0.500736	182	208	0.00955011	2.01999	549	428	0.606645	-0.217065
AGAAAA	52	83	0.000359389	3.44443	925	793	0.680893	-0.166921	684	685	6.31625e-05	4.19954
AGAAAC	38	47	0.0825666	1.0832	577	459	0.134847	-0.870159	306	270	0.294689	0.530636
AGAAAG	56	62	0.16552	0.78115	618	550	0.791773	0.101399	400	349	0.286549	0.5428
AGAAAT	28	41	0.0290219	1.53727	469	505	0.00130546	2.88424	496	431	0.261298	0.582864
AGAACA	24	32	0.107069	0.970336	453	387	0.729599	-0.136916	262	230	0.364414	0.438405
AGAACC	24	28	0.267235	0.573106	318	267	0.648504	-0.188088	137	130	0.196106	0.707508
AGAACG	22	10	0.111409	-0.953079	136	134	0.329933	0.481574	37	39	0.250425	0.601322
AGAACT	31	31	0.526324	0.278746	395	335	0.683299	-0.165389	254	206	0.962613	0.0165482
AGAAGA	67	71	0.200202	0.698531	1052	934	0.752759	0.123344	347	296	0.500048	0.300988
AGAAGC	50	65	0.0244233	1.61219	747	513	2.22388e-05	-4.65289	227	201	0.355571	0.449074
AGAAGG	71	58	0.860118	-0.065442	625	596	0.135727	0.867334	262	257	0.0271893	1.5656
AGAAGT	31	37	0.180554	0.743392	403	362	0.717221	0.144347	312	225	0.208141	-0.681643
AGAATA	11	18	0.0937581	1.02799	213	224	0.0552214	1.25789	281	259	0.129652	0.88722
AGAATC	22	16	0.745395	-0.127614	271	251	0.539115	0.268318	192	183	0.107521	0.968508
AGAATG	26	23	0.88702	0.0520667	396	416	0.0101798	1.99226	308	264	0.474758	0.323527
AGAATT	16	26	0.0435529	1.36098	342	325	0.29474	0.530561	347	342	0.00911003	2.04048
AGACAA	25	26	0.484736	0.314495	300	309	0.0464979	1.33257	209	193	0.175901	0.754733
AGACAC	27	30	0.352393	0.452973	276	265	0.281672	0.550257	157	163	0.0244865	1.61107
AGACAG	43	46	0.288188	0.540324	413	373	0.667957	0.175251	212	232	0.00136277	2.86558
AGACAT	18	21	0.338127	0.470921	248	257	0.0609372	1.21512	219	179	0.919696	0.0363558
AGACCA	19	34	0.00850424	2.07036	348	343	0.118116	0.927692	214	164	0.641667	-0.192691
AGACCC	45	46	0.400466	0.397435	318	240	0.0895353	-1.04801	141	136	0.146841	0.833153
AGACCG	30	13	0.046106	-1.33624	107	75	0.157901	-0.801615	43	23	0.136764	-0.864029
AGACCT	31	27	1	0	331	267	0.325516	-0.487428	166	127	0.680998	-0.166854
AGACGA	16	11	0.700614	-0.154521	94	74	0.536363	-0.270542	25	39	0.0113607	1.94459
AGACGC	48	21	0.0108618	-1.9641	106	83	0.466542	-0.331109	25	25	0.478661	0.319972
AGACGG	32	17	0.150948	-0.821174	130	111	0.897293	-0.0470655	80	44	0.0465068	-1.33248
AGACGT	13	15	0.451674	0.345175	73	74	0.408552	0.388753	41	35	0.818363	0.0870541
AGACTA	9	16	0.073714	1.13245	137	130	0.539706	0.267843	142	81	0.0126354	-1.89841
AGACTC	36	21	0.185505	-0.731645	248	203	0.508789	-0.293463	140	154	0.00822891	2.08466
AGACTG	39	44	0.225371	0.647102	282	261	0.519035	0.284804	249	163	0.0420288	-1.37645
AGACTT	28	30	0.429443	0.367095	265	231	1	0	256	197	0.636656	-0.196095
AGAGAA	68	81	0.0397392	1.40078	851	696	0.193517	-0.71328	420	397	0.024245	1.61538
AGAGAC	47	43	0.751425	0.124115	346	317	0.559457	0.252234	217	167	0.681386	-0.166607
AGAGAG	89	85	0.44706	0.349634	501	399	0.160634	-0.794162	329	284	0.416461	0.380426
AGAGAT	30	24	0.891847	-0.0497097	356	304	0.78477	-0.105257	238	211	0.31917	0.495978
AGAGCA	39	38	0.568416	0.245334	452	353	0.111865	-0.951305	239	187	0.770135	-0.113433
AGAGCC	71	58	0.860118	-0.065442	434	318	0.0174355	-1.75857	201	142	0.232494	-0.633589
AGAGCG	65	37	0.0587014	-1.23135	163	94	0.00113111	-2.94649	32	30	0.609926	0.214723
AGAGCT	35	48	0.0357167	1.44713	417	333	0.213552	-0.670496	206	178	0.504948	0.296753
AGAGGA	73	77	0.189959	0.72134	709	580	0.229932	-0.6384	287	199	0.110143	-0.958043
AGAGGC	85	62	0.407901	-0.389445	387	303	0.147229	-0.832006	181	169	0.17893	0.747316
AGAGGG	58	61	0.269463	0.5695	253	225	0.890621	0.0503072	244	197	1	0
AGAGGT	25	31	0.179762	0.745302	202	198	0.270245	0.568242	198	160	1	0
AGAGTA	9	21	0.00958042	2.01862	141	129	0.714906	0.145751	150	154	0.0377066	1.42358
AGAGTC	19	36	0.00417345	2.3795	205	179	1	0	124	129	0.0431599	1.36492
AGAGTG	33	29	0.899196	0.0461457	305	248	0.394266	-0.404211	208	156	0.526987	-0.2782
AGAGTT	24	17	0.639689	-0.194031	258	213	0.548338	-0.260952	244	221	0.225131	0.647566
AGATAA	18	16	1	0	194	192	0.240629	0.618653	226	201	0.330265	0.481138
AGATAC	12	14	0.43702	0.359499	128	165	0.00101659	2.99285	161	110	0.199339	-0.700408
AGATAG	8	10	0.481348	0.317541	127	123	0.446981	0.349711	114	107	0.279027	0.554354
AGATAT	6	14	0.0413641	1.38338	174	199	0.0108958	1.96274	209	179	0.574398	0.240787
AGATCA	22	28	0.15795	0.801482	296	277	0.426513	0.370068	169	122	0.376498	-0.424237
AGATCC	24	27	0.327699	0.484525	344	279	0.355755	-0.44885	103	95	0.353395	0.45174
AGATCG	12	6	0.348505	-0.457791	96	92	0.558986	0.252599	29	28	0.508084	0.294064
AGATCT	20	16	1	0	260	234	0.786734	0.104172	169	134	0.90806	-0.0418853
AGATGA	7	21	0.00212018	2.67363	516	493	0.165015	0.782476	250	223	0.28742	0.541483
AGATGC	18	21	0.338127	0.470921	333	298	0.780151	0.107821	164	128	0.813941	-0.0894069
AGATGG	22	23	0.55021	0.259472	442	439	0.0631747	1.19946	297	203	0.071906	-1.14323
AGATGT	18	14	0.860711	-0.0651426	320	272	0.741788	-0.12972	280	222	0.857598	-0.0667163
AGATTA	6	15	0.0263979	1.57843	127	123	0.446981	0.349711	201	160	0.91576	-0.0382185
AGATTC	14	17	0.36878	0.433233	228	201	0.961415	0.017089	155	163	0.0205884	1.68638
AGATTG	16	11	0.700614	-0.154521	219	219	0.165088	0.782284	184	151	0.912495	0.0397695
AGATTT	25	37	0.0305218	1.51539	257	240	0.472246	0.325832	436	302	0.0417274	-1.37958
AGCAAA	20	38	0.00340363	2.46806	440	352	0.212631	-0.672373	293	274	0.0831699	1.08003
AGCAAC	16	38	0.000321633	3.49264	327	288	0.935626	0.0288979	153	109	0.351285	-0.454341
AGCAAG	29	30	0.513916	0.289108	458	344	0.0336251	-1.47334	217	186	0.547961	0.261251
AGCAAT	11	20	0.0463592	1.33386	211	224	0.0486615	1.31281	190	152	0.956666	-0.0192397
AGCACA	27	36	0.0772815	1.11192	358	276	0.120452	-0.919187	225	215	0.0761363	1.11841
AGCACC	26	28	0.41368	0.383336	400	295	0.0273561	-1.56295	141	132	0.223738	0.650261
AGCACG	12	5	0.225451	-0.646949	136	88	0.0271466	-1.56628	35	28	1	0
AGCACT	22	14	0.504055	-0.297522	313	192	0.00010052	-3.99775	255	203	0.925115	-0.0338041
AGCAGA	45	45	0.459683	0.337542	617	501	0.218959	-0.659637	245	231	0.096827	1.014
AGCAGC	143	106	0.309134	-0.509853	1169	648	2.72896e-21	-20.564	242	210	0.449175	0.347584
AGCAGG	64	53	0.926313	-0.0332422	497	360	0.00614709	-2.21133	229	208	0.228931	0.640296
AGCAGT	39	36	0.729191	0.137159	448	314	0.00255996	-2.59177	241	180	0.462147	-0.33522
AGCATA	8	6	1	0	112	91	0.62281	-0.205644	147	141	0.154748	0.810376
AGCATC	26	22	1	0	307	267	0.966634	-0.0147381	147	164	0.00431788	2.36473
AGCATG	7	9	0.457853	0.339274	307	244	0.267084	-0.573352	181	177	0.0706945	1.15061
AGCATT	8	29	8.67547e-05	4.06171	207	194	0.515308	0.287933	326	245	0.423812	-0.372827
AGCCAA	40	45	0.193318	0.713728	380	317	0.543594	-0.264725	202	204	0.0246079	1.60893
AGCCAC	31	45	0.0211838	1.674	411	310	0.0479291	-1.3194	250	186	0.413138	-0.383905
AGCCAG	75	59	0.728881	-0.137343	677	425	6.08859e-08	-7.21548	280	231	0.823947	0.0841005
AGCCAT	18	23	0.211114	0.675484	343	247	0.020757	-1.68284	188	140	0.505174	-0.296559
AGCCCA	52	44	1	0	487	318	4.70827e-05	-4.32714	229	190	0.805934	0.0937004
AGCCCC	90	78	0.877313	0.0568453	564	311	3.22993e-11	-10.4908	197	169	0.563329	0.249238
AGCCCG	87	62	0.324015	-0.489435	227	166	0.0854749	-1.06816	42	37	0.73478	0.133842
AGCCCT	45	57	0.0466646	1.33101	504	296	3.60613e-08	-7.44296	214	229	0.00302009	2.51998
AGCCGA	45	32	0.493386	-0.306813	111	98	1	0	45	24	0.115232	-0.938428
AGCCGC	115	66	0.0111654	-1.95213	266	127	8.85632e-09	-8.05275	35	29	1	0
AGCCGG	112	53	0.000406854	-3.39056	208	142	0.0243079	-1.61425	46	45	0.39913	0.398885
AGCCGT	25	19	0.763988	-0.116913	112	70	0.0309167	-1.50981	37	36	0.480245	0.318537
AGCCTA	15	20	0.234626	0.629624	134	118	1	0	120	108	0.424375	0.372251
AGCCTC	74	60	0.862418	-0.064282	454	322	0.00396868	-2.40135	273	222	0.928014	0.0324456
AGCCTG	59	74	0.0291729	1.53502	506	372	0.0111303	-1.95349	299	250	0.699228	0.155381
AGCCTT	38	36	0.642408	0.192189	462	264	2.1635e-08	-7.66484	296	190	0.0137378	-1.86208
AGCGAA	27	10	0.0305345	-1.51521	122	67	0.00212643	-2.67235	22	17	1	0
AGCGAC	28	17	0.298233	-0.525445	111	76	0.106805	-0.971408	23	15	0.625199	-0.203982
AGCGAG	67	34	0.0161517	-1.79178	208	125	0.000795706	-3.09925	51	42	0.917391	0.0374453
AGCGAT	11	9	1	0	70	61	1	0	26	23	0.7751	0.110642
AGCGCA	45	30	0.354189	-0.450765	171	92	0.000153227	-3.81466	21	29	0.0645064	1.1904
AGCGCC	78	58	0.491418	-0.308549	230	138	0.000449042	-3.34771	34	28	1	0
AGCGCG	86	36	0.00025621	-3.5914	89	46	0.00329559	-2.48207	11	7	0.813443	-0.0896728
AGCGCT	37	19	0.0814568	-1.08907	160	99	0.00728913	-2.13732	29	30	0.360924	0.442584
AGCGGA	61	28	0.0074886	-2.1256	168	131	0.325162	-0.487901	24	15	0.520332	-0.28372
AGCGGC	125	60	0.000276024	-3.55905	339	180	3.35894e-08	-7.4738	36	34	0.548551	0.260783
AGCGGG	86	37	0.000392291	-3.40639	171	131	0.273126	-0.563637	45	21	0.0467537	-1.33018
AGCGGT	31	15	0.0767613	-1.11486	62	62	0.472482	0.325615	29	24	1	0
AGCGTA	6	3	0.521208	-0.282989	35	23	0.295762	-0.529058	21	18	0.873135	0.0589187
AGCGTC	25	17	0.537648	-0.269502	107	64	0.0172773	-1.76253	33	20	0.336106	-0.473524
AGCGTG	22	24	0.459834	0.337399	127	98	0.385076	-0.414453	46	40	0.745775	0.127392
AGCGTT	17	10	0.441211	-0.355354	69	41	0.0555817	-1.25507	51	26	0.0660342	-1.18023
AGCTAA	9	16	0.073714	1.13245	111	110	0.380866	0.419228	168	158	0.181099	0.742084
AGCTAC	12	18	0.14302	0.844602	214	165	0.236335	-0.626472	127	114	0.436912	0.359606
AGCTAG	18	17	0.865615	0.0626752	97	91	0.661215	0.179657	111	92	0.887765	0.0517019
AGCTAT	5	12	0.0508501	1.29371	145	134	0.674595	0.170957	174	152	0.469643	0.328232
AGCTCA	32	28	0.8978	0.0468202	381	309	0.321433	-0.49291	198	185	0.150474	0.822539
AGCTCC	68	46	0.259715	-0.585504	437	316	0.0105029	-1.97869	170	163	0.12264	0.911369
AGCTCG	39	26	0.384446	-0.415165	130	79	0.0102686	-1.98849	22	12	0.304207	-0.516831
AGCTCT	32	52	0.00413612	2.38341	346	322	0.438015	0.358511	246	194	0.847912	-0.0716492
AGCTGA	44	45	0.395647	0.402692	417	380	0.570138	0.24402	224	199	0.328193	0.48387
AGCTGC	81	62	0.558162	-0.253239	614	492	0.14793	-0.829944	251	221	0.354491	0.450394
AGCTGG	71	74	0.21238	0.672887	592	569	0.112107	0.950369	312	238	0.520353	-0.283702
AGCTGT	32	37	0.226883	0.644199	349	357	0.0415429	1.3815	301	220	0.27086	-0.567255
AGCTTA	9	13	0.284678	0.545647	116	95	0.678978	-0.168144	140	130	0.270468	0.567884
AGCTTC	42	44	0.331903	0.478988	374	276	0.0336638	-1.47284	183	162	0.386892	0.41241
AGCTTG	23	27	0.259058	0.586602	205	187	0.685786	0.163811	193	122	0.03596	-1.44418
AGCTTT	25	32	0.143217	0.844005	280	243	0.930208	-0.0314198	344	272	0.839414	-0.0760238
AGGAAA	40	57	0.0140265	1.85305	567	564	0.031829	1.49718	503	410	0.89405	0.048638
AGGAAC	29	33	0.253647	0.595771	312	302	0.224858	0.648092	168	138	0.908465	0.0416918
AGGAAG	98	84	0.940819	0.0264939	693	546	0.0682891	-1.16565	349	268	0.570747	-0.243556
AGGAAT	27	26	0.680376	0.167251	306	285	0.458121	0.33902	290	228	0.790949	-0.101851
AGGACA	29	38	0.0857453	1.06679	433	364	0.594309	-0.225988	222	168	0.541472	-0.266424
AGGACC	42	48	0.16927	0.771419	353	303	0.814439	-0.0891415	146	112	0.707475	-0.150289
AGGACG	30	28	0.792413	0.101048	166	113	0.0412443	-1.38464	35	33	0.543406	0.264875
AGGACT	38	25	0.37655	-0.424177	326	250	0.122221	-0.912853	205	152	0.456169	-0.340874
AGGAGA	64	69	0.164896	0.782791	687	648	0.178717	0.747834	318	253	0.899514	-0.0459921
AGGAGC	88	75	1	0	611	460	0.0154765	-1.81033	192	161	0.748082	0.126051
AGGAGG	127	126	0.207551	0.682875	795	536	2.89446e-06	-5.53843	340	236	0.0783493	-1.10596
AGGAGT	36	39	0.298596	0.524915	312	255	0.424091	-0.372541	195	184	0.133978	0.872968
AGGATA	10	10	0.823456	0.0843598	159	158	0.260709	0.583843	153	135	0.476974	0.321505
AGGATC	28	25	0.890802	0.0502189	205	202	0.233476	0.631758	116	107	0.345688	0.461316
AGGATG	21	19	0.874734	0.0581239	362	380	0.0136477	1.86494	202	174	0.533875	0.272561
AGGATT	24	23	0.770063	0.113474	199	222	0.0144839	1.83911	239	194	0.961462	0.0170678
AGGCAA	23	39	0.0073949	2.13107	244	255	0.0483669	1.31545	151	180	0.000393073	3.40553
AGGCAC	32	23	0.590075	-0.229093	240	196	0.50159	-0.299651	177	114	0.0673755	-1.1715
AGGCAG	74	77	0.220608	0.656379	454	332	0.0135688	-1.86746	310	239	0.606701	-0.217025
AGGCAT	15	18	0.382995	0.416807	206	188	0.686463	0.163383	176	178	0.0369124	1.43283
AGGCCA	40	39	0.572962	0.241874	417	361	0.885756	-0.0526861	217	193	0.345217	0.461908
AGGCCC	82	23	5.86317e-07	-6.23187	405	315	0.116796	-0.932572	182	179	0.0637729	1.19536
AGGCCG	66	42	0.148888	-0.827139	194	132	0.0263309	-1.57953	55	45	1	0
AGGCCT	47	33	0.433772	-0.362739	441	294	0.000286245	-3.54326	203	160	0.832994	-0.0793581
AGGCGA	37	22	0.194184	-0.711786	94	71	0.390789	-0.408057	24	31	0.102766	0.988149
AGGCGC	77	46	0.0698841	-1.15562	134	77	0.00297515	-2.52649	38	37	0.418822	0.37797
AGGCGG	112	46	1.99361e-05	-4.70036	236	128	9.53186e-06	-5.02082	89	53	0.091067	-1.04064
AGGCGT	24	20	1	0	79	48	0.0501358	-1.29985	54	43	1	0
AGGCTA	13	12	0.843616	0.0738552	94	116	0.0152883	1.81564	100	107	0.0427343	1.36922
AGGCTC	50	31	0.182004	-0.739919	249	199	0.343987	-0.463458	157	150	0.151097	0.820743
AGGCTG	69	78	0.08243	1.08391	407	365	0.745462	0.127575	364	329	0.136208	0.865797
AGGCTT	31	29	0.699964	0.154924	232	163	0.0340396	-1.46802	226	154	0.109778	-0.959484
AGGGAA	40	35	0.908136	0.0418492	289	280	0.23931	0.621039	329	261	0.868445	-0.0612576
AGGGAC	36	34	0.719249	0.143121	221	194	1	0	153	131	0.633214	0.198449
AGGGAG	79	76	0.468167	0.329599	299	269	0.768468	0.114374	284	250	0.316944	0.499018
AGGGAT	25	17	0.537648	-0.269502	165	142	0.908974	-0.0414485	183	145	0.911578	-0.0402062
AGGGCA	42	43	0.386128	0.413269	283	215	0.126634	-0.89745	219	189	0.517429	0.286149
AGGGCC	59	36	0.12357	-0.908087	276	228	0.532103	-0.274004	154	120	0.808071	-0.0925506
AGGGCG	57	34	0.11465	-0.940625	124	71	0.00404748	-2.39282	44	28	0.345108	-0.462045
AGGGCT	34	53	0.00506899	2.29508	262	178	0.00979168	-2.00914	218	156	0.274674	-0.561182
AGGGGA	64	42	0.206292	-0.685517	255	205	0.374808	-0.426191	249	198	0.886636	-0.0522545
AGGGGC	81	46	0.0322976	-1.49083	249	173	0.0217175	-1.66319	158	147	0.226446	0.645036
AGGGGG	80	45	0.0308415	-1.51086	171	158	0.658494	0.181448	204	131	0.0420565	-1.37617
AGGGGT	28	27	0.685489	0.163999	101	94	0.667558	0.175511	164	125	0.678803	-0.168256
AGGGTA	11	11	0.831244	0.0802714	75	53	0.249944	-0.602158	107	91	0.7212	0.141944
AGGGTC	26	29	0.344207	0.46318	118	106	0.89349	0.0489102	132	102	0.792608	-0.100942
AGGGTG	37	34	0.811918	0.090488	150	151	0.225637	0.64659	218	165	0.571856	-0.242714
AGGGTT	20	19	0.749826	0.125039	98	89	0.82614	0.0829461	195	123	0.0321786	-1.49243
AGGTAA	9	11	0.502648	0.298736	73	74	0.408552	0.388753	166	114	0.206724	-0.68461
AGGTAC	9	4	0.405279	-0.392245	101	78	0.411211	-0.385935	99	75	0.70356	-0.152699
AGGTAG	15	14	0.85323	0.0689341	91	68	0.340803	-0.467496	152	114	0.579166	-0.237197
AGGTAT	5	9	0.188051	0.725724	97	82	0.82273	-0.0847428	165	97	0.0129317	-1.88834
AGGTCA	25	21	1	0	214	240	0.0084087	2.07527	188	130	0.194416	-0.711267
AGGTCC	21	23	0.450152	0.346641	198	158	0.395745	-0.402585	112	79	0.382858	-0.416962
AGGTCG	23	11	0.123998	-0.906587	47	53	0.229131	0.639917	33	22	0.501801	-0.299468
AGGTCT	17	31	0.0129529	1.88763	182	172	0.488723	0.310937	158	120	0.629901	-0.200728
AGGTGA	23	29	0.165128	0.782179	270	266	0.179505	0.745923	195	175	0.320466	0.494218
AGGTGC	26	37	0.0432827	1.36369	262	228	0.963906	-0.0159655	169	137	1	0
AGGTGG	47	50	0.264209	0.578052	384	309	0.286319	-0.543149	242	180	0.433407	-0.363104
AGGTGT	18	24	0.163812	0.785654	199	174	1	0	198	151	0.628124	-0.201955
AGGTTA	11	8	0.820675	-0.0858289	68	84	0.0346926	1.45976	129	109	0.74458	0.128088
AGGTTC	19	17	0.869022	0.0609691	159	132	0.681025	-0.166837	145	82	0.0110232	-1.95769
AGGTTG	22	17	0.872761	-0.0591048	122	117	0.516851	0.286634	183	121	0.0943172	-1.02541
AGGTTT	18	26	0.0953794	1.02055	181	158	1	0	329	211	0.00935967	-2.02874
AGTAAA	9	22	0.00616183	2.21029	176	143	0.537148	-0.269906	284	301	0.00100395	2.99829
AGTAAC	11	12	0.676541	0.169706	98	85	1	0	129	96	0.59176	-0.227854
AGTAAG	6	28	1.69781e-05	4.77011	104	80	0.416529	-0.380354	144	135	0.228359	0.641381
AGTAAT	10	7	0.80993	-0.0915525	114	97	0.890285	-0.0504711	212	194	0.212062	0.673538
AGTACA	9	12	0.381998	0.417939	206	191	0.580183	0.236435	158	126	0.95244	-0.0211625
AGTACC	6	8	0.431804	0.364713	179	146	0.541177	-0.266661	100	67	0.244171	-0.612306
AGTACG	8	5	0.782351	-0.106599	65	64	0.537121	0.269928	11	10	0.828572	0.0816699
AGTACT	6	12	0.0973804	1.01153	154	136	0.95311	0.0208571	168	103	0.0279051	-1.55432
AGTAGA	12	26	0.00554147	2.25637	130	97	0.258061	-0.588278	199	160	1	0
AGTAGC	15	17	0.479054	0.319615	137	79	0.00327364	-2.48497	172	140	0.954615	0.0201718
AGTAGG	14	9	0.539532	-0.267983	46	45	0.601145	0.22102	133	106	0.948194	-0.023103
AGTAGT	10	10	0.823456	0.0843598	97	60	0.0373179	-1.42808	146	107	0.486757	-0.312688
AGTATA	5	9	0.188051	0.725724	76	92	0.036896	1.43302	194	170	0.429611	0.366924
AGTATC	5	3	0.734004	-0.134301	122	102	0.738367	-0.131728	127	107	0.742772	0.129145
AGTATG	4	10	0.0633997	1.19791	166	163	0.31989	0.494999	193	119	0.0226003	-1.64589
AGTATT	9	12	0.381998	0.417939	149	142	0.481062	0.317799	347	258	0.326592	-0.485994
AGTCAA	9	15	0.106482	0.972722	222	183	0.583826	-0.233717	135	137	0.0588301	1.2304
AGTCAC	17	23	0.15459	0.81082	202	175	0.958839	-0.0182542	146	127	0.543069	0.265145
AGTCAG	27	26	0.680376	0.167251	308	226	0.0459573	-1.33765	200	131	0.0679797	-1.16762
AGTCAT	10	11	0.662715	0.178673	198	163	0.597878	-0.223388	186	145	0.782348	-0.1066
AGTCCA	28	31	0.360517	0.443074	280	211	0.103489	-0.985106	147	110	0.572641	-0.242118
AGTCCC	29	37	0.108275	0.96547	239	174	0.06796	-1.16775	142	130	0.300366	0.522349
AGTCCG	37	17	0.0398647	-1.39941	70	52	0.414282	-0.382704	21	17	1	0
AGTCCT	26	24	0.778139	0.108943	277	185	0.00441225	-2.35534	189	156	0.828758	0.0815724
AGTCGA	12	7	0.495561	-0.304903	76	48	0.0869154	-1.0609	27	11	0.0712481	-1.14723
AGTCGC	34	19	0.168164	-0.774267	81	49	0.0431012	-1.36551	19	9	0.253679	-0.595716
AGTCGG	37	16	0.026619	-1.57481	89	73	0.694553	-0.158294	31	19	0.394512	-0.403939
AGTCGT	15	8	0.305002	-0.515697	40	44	0.32541	0.48757	32	14	0.0548162	-1.26109
AGTCTA	8	10	0.481348	0.317541	96	82	0.880903	-0.0550717	102	100	0.178691	0.747898
AGTCTC	35	27	0.799115	-0.0973909	193	155	0.45199	-0.344871	169	140	0.819181	0.0866202
AGTCTG	30	28	0.792413	0.101048	255	202	0.302391	-0.519431	214	139	0.0476265	-1.32215
AGTCTT	23	25	0.389497	0.409496	170	167	0.299725	0.523277	245	204	0.739874	0.130842
AGTGAA	28	29	0.506774	0.295186	404	319	0.179516	-0.745898	280	219	0.752688	-0.123385
AGTGAC	37	36	0.559322	0.252338	259	216	0.613141	-0.21244	178	147	0.867093	0.0619341
AGTGAG	44	39	0.912365	0.0398314	268	207	0.182415	-0.738939	252	215	0.545464	0.263234
AGTGAT	13	21	0.0838447	1.07652	252	242	0.321107	0.49335	221	205	0.157506	0.802702
AGTGCA	25	25	0.572989	0.241853	347	227	0.000688187	-3.16229	223	167	0.476228	-0.322185
AGTGCC	29	25	1	0	353	234	0.000925344	-3.0337	169	145	0.609531	0.215004
AGTGCG	32	12	0.0148979	-1.82688	115	56	0.000290287	-3.53717	26	23	0.7751	0.110642
AGTGCT	26	31	0.231467	0.635511	255	234	0.61814	0.208913	262	162	0.00826603	-2.0827
AGTGGA	42	36	1	0	395	405	0.0255477	1.59265	226	183	1	0
AGTGGC	44	32	0.565517	-0.247554	328	269	0.435961	-0.360552	237	157	0.060648	-1.21718
AGTGGG	38	27	0.534667	-0.271917	289	217	0.0904456	-1.04361	222	141	0.0265878	-1.57532
AGTGGT	21	19	0.874734	0.0581239	252	217	0.889593	-0.0508088	229	139	0.00866035	-2.06246
AGTGTA	11	13	0.421694	0.375003	163	104	0.0118417	-1.92659	210	129	0.0161005	-1.79316
AGTGTC	16	16	0.723642	0.140476	226	193	0.806825	-0.0932207	181	138	0.652406	-0.185482
AGTGTG	21	22	0.54153	0.266377	415	261	2.55588e-05	-4.59246	275	197	0.211356	-0.674986
AGTGTT	21	19	0.874734	0.0581239	215	166	0.237625	-0.624107	343	232	0.0397649	-1.4005
AGTTAA	8	12	0.262429	0.580988	137	105	0.33385	-0.476449	266	200	0.456418	-0.340637
AGTTAC	5	15	0.0119346	1.92319	153	118	0.329981	-0.481512	143	122	0.665588	0.176794
AGTTAG	8	10	0.481348	0.317541	69	65	0.729235	0.137132	135	114	0.75003	0.124921
AGTTAT	6	7	0.589589	0.229451	128	115	0.847268	0.0719792	213	192	0.271634	0.566016
AGTTCA	10	22	0.0120173	1.92019	318	247	0.164121	-0.784835	217	189	0.454083	0.342865
AGTTCC	34	17	0.0909042	-1.04142	277	213	0.160497	-0.794533	172	122	0.291212	-0.535791
AGTTCG	12	6	0.348505	-0.457791	98	63	0.0580422	-1.23626	34	26	0.897066	-0.0471758
AGTTCT	24	16	0.52693	-0.278247	259	217	0.646163	-0.189658	281	228	0.964445	0.0157224
AGTTGA	21	20	0.755144	0.12197	142	148	0.141342	0.849728	201	136	0.124836	-0.90366
AGTTGC	29	27	0.788952	0.10295	158	163	0.145904	0.835934	138	112	1	0
AGTTGG	42	25	0.178111	-0.74931	211	165	0.301205	-0.521138	218	155	0.25181	-0.598927
AGTTGT	14	9	0.539532	-0.267983	153	131	0.858661	-0.0661784	275	168	0.0047516	-2.32316
AGTTTA	9	20	0.0147495	1.83122	148	135	0.765837	0.115864	301	244	0.965642	0.0151839
AGTTTC	21	28	0.11703	0.931702	217	217	0.177842	0.749967	269	194	0.24267	-0.614983
AGTTTG	35	30	1	0	263	240	0.655021	0.183744	349	212	0.00106286	-2.97353
AGTTTT	45	26	0.123078	-0.909819	189	213	0.0123456	1.90849	533	402	0.323586	-0.49001
ATAAAA	24	36	0.0372701	1.42864	229	235	0.0937848	1.02787	689	615	0.070062	1.15452
ATAAAC	7	13	0.114945	0.939509	126	105	0.741789	-0.12972	267	239	0.245165	0.610542
ATAAAG	26	36	0.0565393	1.24765	177	211	0.00263665	2.57895	322	299	0.0825526	1.08327
ATAAAT	9	27	0.000600514	3.22148	185	151	0.547681	-0.261472	500	472	0.0154577	1.81085
ATAACA	13	10	0.838206	-0.0766492	137	141	0.18606	0.730347	190	191	0.0344794	1.46244
ATAACC	6	8	0.431804	0.364713	74	92	0.024202	1.61615	118	113	0.20853	0.680831
ATAACG	5	3	0.734004	-0.134301	18	26	0.129869	0.886494	35	22	0.424471	-0.372152
ATAACT	8	12	0.262429	0.580988	91	94	0.269495	0.56945	195	182	0.161969	0.790569
ATAAGA	8	17	0.0282423	1.5491	136	162	0.00887351	2.0519	177	199	0.00128709	2.89039
ATAAGC	5	6	0.763986	0.116915	89	89	0.408675	0.388622	137	114	0.848985	0.0711
ATAAGG	16	15	0.857607	0.0667117	105	109	0.217931	0.661682	141	100	0.331885	-0.479012
ATAAGT	5	6	0.763986	0.116915	99	62	0.0399638	-1.39833	173	148	0.613567	0.212138
ATAATA	10	9	1	0	75	115	0.000144641	3.83971	328	313	0.0351442	1.45415
ATAATC	7	7	0.793761	0.10031	89	105	0.043642	1.3601	143	150	0.0254953	1.59354
ATAATG	3	6	0.317113	0.498786	151	164	0.0621956	1.20624	267	221	0.784796	0.105243
ATAATT	13	15	0.451674	0.345175	97	133	0.000730657	3.13629	380	392	0.000657355	3.1822
ATACAA	8	20	0.00747872	2.12617	154	203	0.000127827	3.89338	213	219	0.0118284	1.92707
ATACAC	8	19	0.0117797	1.92886	114	108	0.590586	0.228717	148	106	0.377011	-0.423646
ATACAG	11	11	0.831244	0.0802714	190	180	0.465779	0.33182	203	169	0.794307	0.100012
ATACAT	5	11	0.0801004	1.09637	129	111	0.948432	-0.0229938	262	235	0.240916	0.618135
ATACCA	13	11	1	0	170	173	0.175969	0.754564	165	124	0.59443	-0.2259
ATACCC	9	8	1	0	100	90	0.884447	0.0533284	74	55	0.65912	-0.181036
ATACCG	6	5	1	0	56	38	0.255585	-0.592465	22	10	0.155171	-0.809188
ATACCT	4	12	0.0232383	1.6338	145	150	0.161304	0.792356	167	145	0.531257	0.274695
ATACGA	1	5	0.100344	0.998509	43	43	0.589289	0.229672	26	14	0.266083	-0.574983
ATACGC	5	3	0.734004	-0.134301	16	23	0.148447	0.828428	16	21	0.185114	0.73256
ATACGG	4	3	1	0	39	44	0.271721	0.565877	17	21	0.195681	0.708452
ATACGT	2	4	0.422802	0.373863	26	26	0.677771	0.168917	37	37	0.352904	0.452344
ATACTA	3	8	0.126627	0.897474	89	69	0.473562	-0.324623	141	156	0.00716275	2.14492
ATACTC	4	9	0.102038	0.991239	87	100	0.0668342	1.175	105	107	0.0971451	1.01258
ATACTG	9	14	0.208391	0.68112	212	184	0.959845	-0.0177987	226	178	0.841389	-0.0750033
ATACTT	11	11	0.831244	0.0802714	92	103	0.0985203	1.00647	273	230	0.653801	0.184554
ATAGAA	13	10	0.838206	-0.0766492	161	159	0.287355	0.541582	221	221	0.024498	1.61087
ATAGAC	8	11	0.359166	0.444705	70	86	0.0368511	1.43355	104	91	0.614215	0.211679
ATAGAG	3	20	6.88591e-05	4.16204	103	118	0.0503551	1.29796	143	134	0.226748	0.644456
ATAGAT	5	10	0.123968	0.906689	80	91	0.091813	1.0371	190	164	0.521796	0.282499
ATAGCA	10	9	1	0	120	116	0.473074	0.325071	148	158	0.0156074	1.80667
ATAGCC	6	9	0.307768	0.511777	78	70	0.934377	0.0294778	96	82	0.706864	0.150664
ATAGCG	3	4	0.709948	0.148773	17	19	0.506341	0.295557	17	12	0.852361	-0.0693763
ATAGCT	8	11	0.359166	0.444705	79	80	0.382185	0.417727	173	129	0.524505	-0.28025
ATAGGA	7	8	0.611237	0.21379	78	101	0.0106637	1.97209	152	131	0.590783	0.228572
ATAGGC	6	6	0.780924	0.107391	57	51	0.923422	0.0345999	94	71	0.696053	-0.157358
ATAGGG	4	9	0.102038	0.991239	44	50	0.215795	0.665958	103	84	0.941507	0.0261763
ATAGGT	1	3	0.338965	0.469845	53	30	0.0612158	-1.21314	133	90	0.201382	-0.695978
ATAGTA	6	4	0.76225	-0.117903	58	51	1	0	149	143	0.141315	0.849812
ATAGTC	5	4	1	0	53	48	0.920641	0.0359096	75	86	0.0264561	1.57747
ATAGTG	7	9	0.457853	0.339274	111	97	1	0	152	126	0.85642	0.0673131
ATAGTT	5	5	1	0	73	59	0.663735	-0.178005	215	166	0.68051	-0.167165
ATATAA	9	14	0.208391	0.68112	110	141	0.0028798	2.54064	316	321	0.00360865	2.44265
ATATAC	8	10	0.481348	0.317541	71	84	0.0641395	1.19287	217	180	0.800779	0.0964875
ATATAG	2	6	0.154153	0.812048	46	59	0.0625911	1.20349	166	152	0.259798	0.585365
ATATAT	8	24	0.00110659	2.95601	84	107	0.0109726	1.95969	681	529	0.524604	-0.280169
ATATCA	4	5	0.740748	0.13033	143	198	2.73698e-05	4.56273	153	148	0.117669	0.929337
ATATCC	7	9	0.457853	0.339274	108	134	0.00679743	2.16766	123	96	0.838593	-0.0764485
ATATCG	2	2	1	0	32	50	0.0106444	1.97288	19	17	0.867169	0.0618962
ATATCT	3	13	0.0050291	2.29851	108	128	0.0222279	1.6531	229	209	0.211347	0.675003
ATATGA	8	10	0.481348	0.317541	200	188	0.508331	0.293854	207	239	0.000162761	3.78845
ATATGC	4	6	0.528288	0.277129	103	115	0.0774849	1.11078	161	148	0.252937	0.596987
ATATGG	5	9	0.188051	0.725724	145	149	0.178801	0.747629	147	131	0.432938	0.363574
ATATGT	3	12	0.00899424	2.04604	117	116	0.35817	0.44591	357	276	0.60345	-0.219359
ATATTA	10	14	0.227248	0.643499	104	116	0.0787721	1.10363	323	288	0.222161	0.653333
ATATTC	6	9	0.307768	0.511777	126	162	0.00114625	2.94072	221	210	0.0900449	1.04554
ATATTG	11	7	0.640444	-0.193519	185	159	0.871411	-0.0597768	265	222	0.681825	0.166327
ATATTT	18	18	0.620693	0.207123	166	200	0.00234925	2.62907	823	644	0.581128	-0.235728
ATCAAA	13	8	0.518759	-0.285034	318	282	0.870092	0.0604347	227	230	0.0163073	1.78762
ATCAAC	14	11	1	0	164	256	4.7508e-09	8.32323	109	81	0.609784	-0.214824
ATCAAG	10	22	0.0120173	1.92019	327	321	0.145262	0.837848	139	141	0.0621907	1.20627
ATCAAT	6	12	0.0973804	1.01153	120	188	4.37963e-07	6.35856	131	142	0.0148712	1.82766
ATCACA	12	16	0.258128	0.588166	256	253	0.182509	0.738717	172	159	0.223954	0.649842
ATCACC	19	19	0.62853	0.201674	253	282	0.0055046	2.25927	121	122	0.081855	1.08695
ATCACG	9	5	0.594164	-0.226094	62	80	0.0229824	1.6386	46	28	0.245205	-0.610471
ATCACT	9	21	0.00958042	2.01862	152	140	0.681566	0.166492	205	167	0.958414	0.0184467
ATCAGA	14	16	0.465677	0.331915	475	320	0.000283374	-3.54764	203	195	0.0863817	1.06358
ATCAGC	17	21	0.258163	0.588106	320	276	0.869619	-0.0606709	128	129	0.0788667	1.10311
ATCAGG	22	26	0.250909	0.600483	227	210	0.565388	0.247654	148	121	0.951111	0.0217686
ATCAGT	8	11	0.359166	0.444705	245	213	0.962662	-0.0165261	205	170	0.795258	0.0994922
ATCATA	4	8	0.160843	0.793598	81	96	0.0498679	1.30218	139	141	0.0621907	1.20627
ATCATC	8	11	0.359166	0.444705	239	284	0.000523626	3.28098	110	124	0.0122969	1.9102
ATCATG	20	16	1	0	226	216	0.365162	0.437515	174	175	0.0407161	1.39023
ATCATT	12	19	0.104203	0.982119	195	200	0.118052	0.927925	231	240	0.00621027	2.20689
ATCCAA	9	11	0.502648	0.298736	210	236	0.00897712	2.04686	153	143	0.219497	0.658571
ATCCAC	11	17	0.130707	0.8837	264	191	0.048319	-1.31588	119	100	0.785878	0.104645
ATCCAG	24	23	0.770063	0.113474	429	382	0.805481	0.0939445	168	129	0.683336	-0.165366
ATCCAT	16	11	0.700614	-0.154521	187	185	0.252894	0.597062	162	175	0.00843551	2.07389
ATCCCA	25	31	0.179762	0.745302	247	220	0.852941	0.0690809	201	173	0.532962	0.273304
ATCCCC	35	24	0.436907	-0.359611	209	174	0.645022	-0.190425	141	102	0.438806	-0.357728
ATCCCG	26	11	0.0680842	-1.16695	79	61	0.498345	-0.302469	26	18	0.652114	-0.185676
ATCCCT	17	19	0.409179	0.388086	210	180	0.879	-0.0560109	182	153	0.741639	0.129808
ATCCGA	7	12	0.167231	0.776684	87	72	0.750963	-0.124381	19	15	1	0
ATCCGC	16	11	0.700614	-0.154521	104	85	0.662261	-0.178971	20	9	0.190316	-0.720524
ATCCGG	16	10	0.556175	-0.254789	74	95	0.0135671	1.86751	14	14	0.574865	0.240434
ATCCGT	11	10	1	0	47	61	0.0430065	1.36647	22	17	1	0
ATCCTA	7	17	0.0221526	1.65457	110	126	0.0429293	1.36725	117	124	0.0379305	1.42101
ATCCTC	25	19	0.763988	-0.116913	244	235	0.313646	0.50356	136	148	0.012118	1.91657
ATCCTG	18	32	0.01061	1.97428	365	394	0.00402386	2.39536	214	183	0.578778	0.237488
ATCCTT	15	20	0.234626	0.629624	203	199	0.271399	0.566392	223	168	0.508951	-0.293324
ATCGAA	5	1	0.228395	-0.641313	82	75	0.810581	0.0912034	16	22	0.105341	0.977402
ATCGAC	4	3	1	0	79	86	0.161211	0.792606	12	9	1	0
ATCGAG	16	5	0.0489145	-1.31056	118	121	0.243149	0.614128	27	19	0.767146	-0.115122
ATCGAT	2	2	1	0	42	65	0.00361094	2.44238	21	10	0.206303	-0.685494
ATCGCA	6	8	0.431804	0.364713	50	60	0.104527	0.98077	21	12	0.384345	-0.415278
ATCGCC	15	6	0.128581	-0.890824	93	102	0.131525	0.880993	16	30	0.00694223	2.1585
ATCGCG	20	10	0.200951	-0.69691	30	21	0.484105	-0.315061	12	10	1	0
ATCGCT	14	7	0.280414	-0.552201	72	73	0.405436	0.392078	31	36	0.141622	0.848868
ATCGGA	11	7	0.640444	-0.193519	80	65	0.67797	-0.16879	19	18	0.624562	0.204424
ATCGGC	14	3	0.0259738	-1.58546	75	68	0.867028	0.061967	23	16	0.748076	-0.126054
ATCGGG	16	6	0.0896601	-1.0474	61	60	0.525111	0.279749	27	16	0.360161	-0.443503
ATCGGT	5	6	0.763986	0.116915	34	34	0.627601	0.202317	22	11	0.222189	-0.653277
ATCGTA	3	3	1	0	27	24	1	0	25	22	0.771315	0.112768
ATCGTC	8	6	1	0	77	69	0.93394	0.0296812	13	16	0.267774	0.572232
ATCGTG	7	6	1	0	76	107	0.00141752	2.84847	28	31	0.239872	0.62002
ATCGTT	10	5	0.439635	-0.356908	47	41	1	0	33	26	1	0
ATCTAA	8	13	0.188133	0.725535	105	85	0.611348	-0.213711	169	150	0.398678	0.399377
ATCTAC	7	8	0.611237	0.21379	145	154	0.104424	0.9812	83	83	0.184314	0.734442
ATCTAG	8	6	1	0	79	50	0.0775707	-1.1103	108	103	0.239172	0.621291
ATCTAT	1	11	0.00194512	2.71105	91	169	3.49324e-09	8.45677	185	170	0.219974	0.657628
ATCTCA	14	15	0.57865	0.237584	245	210	0.850949	-0.0700965	209	187	0.312174	0.505603
ATCTCC	21	28	0.11703	0.931702	251	237	0.414187	0.382804	167	148	0.427568	0.368995
ATCTCG	14	8	0.401043	-0.396809	60	45	0.493736	-0.306506	33	34	0.327643	0.484599
ATCTCT	26	22	1	0	188	202	0.0476217	1.3222	218	227	0.00752075	2.12374
ATCTGA	14	26	0.017005	1.76942	245	212	0.925319	-0.0337085	219	173	0.878879	-0.056071
ATCTGC	29	24	1	0	246	236	0.315528	0.500963	185	136	0.43205	-0.364466
ATCTGG	23	24	0.558648	0.252862	245	244	0.159962	0.795984	200	136	0.138302	-0.859172
ATCTGT	13	13	0.697861	0.156231	174	183	0.0894663	1.04834	295	238	1	0
ATCTTA	10	16	0.118506	0.926261	118	108	0.739382	0.131131	219	194	0.34726	0.459346
ATCTTC	16	25	0.0598502	1.22293	281	270	0.285723	0.544055	187	178	0.114475	0.941288
ATCTTG	20	14	0.610492	-0.21432	139	171	0.00302295	2.51957	247	170	0.115031	-0.939184
ATCTTT	18	24	0.163812	0.785654	199	233	0.00275167	2.5604	423	308	0.18037	-0.743836
ATGAAA	9	15	0.106482	0.972722	450	458	0.0236492	1.62618	414	423	0.000647741	3.1886
ATGAAC	12	10	1	0	289	263	0.66968	0.174133	178	127	0.300261	-0.522502
ATGAAG	12	24	0.0179205	1.74665	583	555	0.162434	0.789324	249	218	0.376889	0.423787
ATGAAT	11	15	0.242843	0.614674	420	299	0.00633285	-2.1984	271	242	0.266813	0.573793
ATGACA	6	19	0.00393521	2.40503	310	362	0.000201125	3.69653	220	189	0.550636	0.259135
ATGACC	11	11	0.831244	0.0802714	242	231	0.356756	0.447629	131	97	0.549132	-0.260323
ATGACG	6	4	0.76225	-0.117903	97	89	0.769058	0.114041	23	19	1	0
ATGACT	9	13	0.284678	0.545647	240	243	0.110568	0.95637	182	190	0.0141334	1.84975
ATGAGA	16	20	0.247417	0.606571	295	335	0.00119979	2.92089	240	192	0.961412	-0.0170906
ATGAGC	16	11	0.700614	-0.154521	243	261	0.0227148	1.64369	125	124	0.110901	0.955065
ATGAGG	15	22	0.10159	0.99315	328	319	0.180489	0.743549	181	149	0.868154	0.0614034
ATGAGT	11	6	0.469417	-0.328441	238	177	0.104492	-0.980918	182	145	0.955651	-0.0197008
ATGATA	5	4	1	0	155	161	0.128312	0.891733	191	187	0.0624693	1.20433
ATGATC	6	11	0.145786	0.836284	165	194	0.00586957	2.23139	126	111	0.513834	0.289177
ATGATG	13	13	0.697861	0.156231	498	438	0.947761	0.0233012	214	160	0.498973	-0.301923
ATGATT	7	8	0.611237	0.21379	199	184	0.608673	0.215616	273	239	0.373927	0.427213
ATGCAA	7	11	0.238916	0.621754	234	208	0.886317	0.0524112	246	190	0.664863	-0.177268
ATGCAC	12	19	0.104203	0.982119	177	141	0.431417	-0.365102	129	134	0.0407629	1.38974
ATGCAG	11	22	0.0218749	1.66005	430	340	0.169793	-0.77008	216	186	0.514685	0.288458
ATGCAT	5	16	0.00719189	2.14316	168	155	0.655633	0.183339	198	200	0.026424	1.578
ATGCCA	7	16	0.034074	1.46758	342	344	0.0719844	1.14276	200	170	0.637973	0.195197
ATGCCC	19	16	1	0	263	207	0.267178	-0.573199	149	115	0.757039	-0.120882
ATGCCG	6	5	1	0	94	72	0.436721	-0.359796	27	21	1	0
ATGCCT	10	23	0.00789631	2.10258	240	248	0.0694836	1.15812	205	192	0.143167	0.844156
ATGCGA	3	10	0.0277357	1.55696	42	50	0.144676	0.839605	27	22	1	0
ATGCGC	8	6	1	0	53	48	0.920641	0.0359096	29	19	0.56211	-0.250179
ATGCGG	15	2	0.00566623	-2.24671	100	72	0.221622	-0.654387	24	19	1	0
ATGCGT	7	6	1	0	40	27	0.328262	-0.483779	33	28	0.897773	0.0468334
ATGCTA	2	8	0.0515508	1.28776	120	112	0.645327	0.19022	148	137	0.257694	0.588896
ATGCTC	13	11	1	0	156	158	0.213278	0.671053	136	117	0.613461	0.212213
ATGCTG	23	22	0.765258	0.116192	421	420	0.0618756	1.20848	241	211	0.394543	0.403906
ATGCTT	15	18	0.382995	0.416807	194	170	1	0	279	210	0.466823	-0.330848
ATGGAA	12	27	0.00363616	2.43936	363	467	3.50884e-08	7.45484	333	271	0.934762	0.0292989
ATGGAC	6	12	0.0973804	1.01153	289	245	0.728703	-0.137449	154	119	0.760937	-0.118651
ATGGAG	22	30	0.0954322	1.02031	481	472	0.0794791	1.09975	223	199	0.304093	0.516994
ATGGAT	13	13	0.697861	0.156231	270	258	0.315984	0.500334	181	181	0.0443987	1.35263
ATGGCA	13	19	0.155385	0.808592	376	349	0.434471	0.362039	183	182	0.0455309	1.34169
ATGGCC	9	18	0.0338203	1.47082	297	300	0.0847988	1.07161	123	104	0.738794	0.131477
ATGGCG	19	9	0.184345	-0.734368	161	102	0.0111649	-1.95214	41	28	0.545876	-0.262906
ATGGCT	16	11	0.700614	-0.154521	288	310	0.0123416	1.90863	188	171	0.265022	0.576719
ATGGGA	15	13	1	0	292	281	0.258448	0.587626	226	187	0.804662	0.0943863
ATGGGC	15	14	0.85323	0.0689341	211	217	0.099471	1.0023	118	108	0.349469	0.456592
ATGGGG	5	22	0.000292922	3.53325	218	217	0.19436	0.711394	212	172	0.9591	0.0181362
ATGGGT	10	9	1	0	126	131	0.169472	0.770901	142	108	0.656663	-0.182657
ATGGTA	3	10	0.0277357	1.55696	113	132	0.0249702	1.60258	195	144	0.444492	-0.352136
ATGGTC	4	8	0.160843	0.793598	121	160	0.000631503	3.19962	129	76	0.0294849	-1.5304
ATGGTG	16	28	0.0223991	1.64977	292	281	0.258448	0.587626	250	178	0.206509	-0.685061
ATGGTT	13	8	0.518759	-0.285034	147	169	0.0177353	1.75116	203	166	0.916622	0.0378099
ATGTAA	9	11	0.502648	0.298736	254	134	1.54414e-06	-5.81131	397	311	0.705554	-0.15147
ATGTAC	4	10	0.0633997	1.19791	134	135	0.271293	0.566561	193	161	0.748759	0.125658
ATGTAG	7	10	0.334487	0.47562	122	79	0.0401414	-1.39641	213	143	0.0982535	-1.00765
ATGTAT	4	9	0.102038	0.991239	141	130	0.670493	0.173606	440	352	0.914646	-0.0387471
ATGTCA	11	12	0.676541	0.169706	257	229	0.855751	0.0676524	213	192	0.271634	0.566016
ATGTCC	6	3	0.521208	-0.282989	207	223	0.0333408	1.47702	142	119	0.756035	0.121458
ATGTCG	4	4	1	0	68	39	0.0413784	-1.38323	32	25	1	0
ATGTCT	6	15	0.0263979	1.57843	211	200	0.429118	0.367423	260	239	0.1496	0.825069
ATGTGA	24	21	1	0	298	318	0.0153109	1.815	344	259	0.412768	-0.384294
ATGTGC	12	13	0.553692	0.256732	213	186	1	0	217	162	0.469749	-0.328134
ATGTGG	16	15	0.857607	0.0667117	622	386	8.89107e-08	-7.05105	257	213	0.780803	0.107459
ATGTGT	11	15	0.242843	0.614674	207	176	0.798006	-0.0979938	396	284	0.132565	-0.87757
ATGTTA	5	6	0.763986	0.116915	126	132	0.151589	0.819332	290	216	0.395542	-0.402807
ATGTTC	9	4	0.405279	-0.392245	174	225	0.000107536	3.96845	205	179	0.441707	0.354866
ATGTTG	19	14	0.730001	-0.136677	199	194	0.288694	0.539562	301	239	0.862653	-0.0641637
ATGTTT	9	18	0.0338203	1.47082	167	197	0.00453082	2.34382	594	460	0.515351	-0.287897
ATTAAA	18	26	0.0953794	1.02055	187	163	1	0	532	517	0.00257577	2.58909
ATTAAC	10	9	1	0	71	93	0.0120344	1.91958	175	153	0.470735	0.327224
ATTAAG	9	18	0.0338203	1.47082	129	96	0.255929	-0.59188	218	161	0.408694	-0.388602
ATTAAT	11	8	0.820675	-0.0858289	91	92	0.33625	0.473338	296	283	0.0446759	1.34993
ATTACA	10	20	0.0270261	1.56822	153	197	0.000323593	3.49	263	214	0.926665	0.0330771
ATTACC	2	5	0.258819	0.587004	125	139	0.0557146	1.25403	113	98	0.628045	0.202009
ATTACG	5	3	0.734004	-0.134301	32	42	0.102219	0.990469	32	21	0.492452	-0.307636
ATTACT	11	12	0.676541	0.169706	131	144	0.0610044	1.21464	220	157	0.254463	-0.594376
ATTAGA	5	9	0.188051	0.725724	109	103	0.582543	0.234672	186	172	0.202139	0.69435
ATTAGC	9	11	0.502648	0.298736	59	58	0.578463	0.237725	138	125	0.352717	0.452573
ATTAGG	6	5	1	0	53	38	0.400775	-0.3971	129	103	0.947469	-0.0234352
ATTAGT	6	10	0.214114	0.669354	53	67	0.0542265	1.26579	172	131	0.6441	-0.191047
ATTATA	6	15	0.0263979	1.57843	99	121	0.0148372	1.82865	313	304	0.0232469	1.63363
ATTATC	11	12	0.676541	0.169706	96	143	5.33898e-05	4.27254	141	137	0.131368	0.881509
ATTATG	5	5	1	0	139	150	0.0770397	1.11329	232	231	0.0247596	1.60626
ATTATT	15	34	0.00134741	2.8705	130	191	5.23547e-06	5.28104	501	427	0.409055	0.388219
ATTCAA	10	14	0.227248	0.643499	203	222	0.0222768	1.65215	215	228	0.00410715	2.38646
ATTCAC	11	12	0.676541	0.169706	235	172	0.0819146	-1.08664	175	176	0.0412241	1.38485
ATTCAG	9	23	0.00392736	2.4059	325	309	0.300825	0.521686	266	238	0.244406	0.611888
ATTCAT	13	19	0.155385	0.808592	258	205	0.305826	-0.514525	252	303	3.02524e-06	5.51924
ATTCCA	21	13	0.395225	-0.403156	260	267	0.0667787	1.17536	265	217	0.890692	0.0502726
ATTCCC	16	18	0.491836	0.30818	155	140	0.815502	0.0885751	183	123	0.120755	-0.918094
ATTCCG	5	12	0.0508501	1.29371	58	69	0.0910407	1.04076	26	19	0.766806	-0.115314
ATTCCT	24	30	0.172404	0.763452	234	231	0.209405	0.679013	299	204	0.0659996	-1.18046
ATTCGA	1	5	0.100344	0.998509	79	49	0.0626797	-1.20287	27	17	0.45201	-0.344852
ATTCGC	9	2	0.0754437	-1.12238	61	26	0.00171483	-2.76578	14	18	0.214539	0.668494
ATTCGG	12	6	0.348505	-0.457791	62	52	0.851461	-0.0698351	31	20	0.482966	-0.316083
ATTCGT	4	5	0.740748	0.13033	33	40	0.196621	0.70637	31	27	0.792756	0.10086
ATTCTA	7	12	0.167231	0.776684	107	136	0.00378536	2.42189	224	209	0.134036	0.872779
ATTCTC	15	17	0.479054	0.319615	187	162	0.957227	-0.0189852	249	204	0.887281	0.0519386
ATTCTG	33	40	0.128413	0.891391	260	275	0.0301749	1.52035	309	263	0.528262	0.277151
ATTCTT	23	30	0.129871	0.886487	210	216	0.0987388	1.00551	377	314	0.673971	0.171359
ATTGAA	18	23	0.211114	0.675484	232	275	0.000702487	3.15336	264	245	0.118602	0.925907
ATTGAC	19	8	0.121173	-0.916596	155	170	0.0452109	1.34476	137	107	0.84688	-0.0721783
ATTGAG	21	15	0.738534	-0.13163	186	170	0.710067	0.148701	194	155	0.957082	-0.0190507
ATTGAT	12	14	0.43702	0.359499	153	181	0.0060749	2.21646	219	182	0.763409	0.117243
ATTGCA	13	17	0.273065	0.563734	186	198	0.0583349	1.23407	205	178	0.472275	0.325805
ATTGCC	11	7	0.640444	-0.193519	173	194	0.0184875	1.73312	136	144	0.0259568	1.58575
ATTGCG	7	7	0.793761	0.10031	32	27	0.897186	-0.0471174	18	20	0.332295	0.478476
ATTGCT	10	22	0.0120173	1.92019	162	174	0.0629986	1.20067	254	198	0.740594	-0.13042
ATTGGA	9	17	0.0502745	1.29865	222	258	0.00214191	2.6692	209	146	0.200007	-0.698956
ATTGGC	24	15	0.422593	-0.374078	137	143	0.150498	0.822468	132	97	0.506678	-0.295268
ATTGGG	19	17	0.869022	0.0609691	113	129	0.0393474	1.40508	180	131	0.392365	-0.406309
ATTGGT	11	13	0.421694	0.375003	110	131	0.0199177	1.70076	181	121	0.118017	-0.928054
ATTGTA	7	9	0.457853	0.339274	98	96	0.471861	0.326186	371	239	0.00713209	-2.14678
ATTGTC	19	9	0.184345	-0.734368	144	139	0.43866	0.357872	190	137	0.344336	-0.463017
ATTGTG	17	13	0.855788	-0.0676337	191	195	0.138935	0.857188	278	230	0.788934	0.10296
ATTGTT	15	15	0.715544	0.145363	123	115	0.649357	0.187516	384	326	0.497003	0.303641
ATTTAA	14	27	0.0117124	1.93135	146	163	0.0347704	1.45879	585	485	0.666759	0.176031
ATTTAC	12	11	1	0	133	144	0.0807091	1.09308	259	199	0.638369	-0.194928
ATTTAG	6	6	0.780924	0.107391	99	94	0.613662	0.212071	255	192	0.475907	-0.322478
ATTTAT	9	34	1.04554e-05	4.98066	143	175	0.00287388	2.54153	676	595	0.120638	0.918516
ATTTCA	25	24	0.669881	0.174002	223	304	4.648e-07	6.33273	458	328	0.106285	-0.973528
ATTTCC	25	35	0.0687856	1.1625	156	209	5.15143e-05	4.28807	280	270	0.0393986	1.40452
ATTTCG	16	6	0.0896601	-1.0474	44	39	1	0	33	31	0.61537	0.210864
ATTTCT	32	30	0.703886	0.152498	203	231	0.00698408	2.15589	548	426	0.583696	-0.233813
ATTTGA	16	16	0.723642	0.140476	271	229	0.719949	-0.142699	395	328	0.708355	0.149749
ATTTGC	22	14	0.504055	-0.297522	157	167	0.0842317	1.07452	288	236	0.860562	0.0652178
ATTTGG	23	33	0.0597724	1.2235	231	206	0.848047	0.0715801	346	241	0.0812724	-1.09006
ATTTGT	21	27	0.150884	0.821358	163	157	0.400977	0.39688	540	406	0.295218	-0.529857
ATTTTA	20	26	0.182436	0.738889	167	187	0.0218857	1.65984	810	633	0.560082	-0.251748
ATTTTC	37	25	0.444836	-0.3518	155	224	1.49652e-06	5.82492	546	423	0.53931	-0.268161
ATTTTG	33	39	0.192869	0.714737	279	274	0.186318	0.729745	697	515	0.132913	-0.876432
ATTTTT	52	62	0.0739931	1.13081	153	246	2.44991e-09	8.61085	1372	1039	0.129204	-0.888725
CAAAAA	28	33	0.20141	0.695918	430	355	0.431237	-0.365284	490	474	0.00480613	2.3182
CAAAAC	12	22	0.0374171	1.42693	309	233	0.09302	-1.03142	260	225	0.437911	0.358614
CAAAAG	22	33	0.0417914	1.37891	392	364	0.42262	0.37405	265	276	0.0032357	2.49003
CAAAAT	11	28	0.00118914	2.92477	316	303	0.259453	0.585941	365	339	0.063172	1.19948
CAAACA	14	25	0.0244555	1.61162	285	254	0.862903	0.064038	233	248	0.00244502	2.61172
CAAACC	12	23	0.0260195	1.5847	244	185	0.146621	-0.833804	134	150	0.00599017	2.22256
CAAACG	11	11	0.831244	0.0802714	99	70	0.189912	-0.721447	30	21	0.674007	-0.171336
CAAACT	14	27	0.0117124	1.93135	260	206	0.306991	-0.512875	250	197	0.812187	-0.0903437
CAAAGA	38	36	0.642408	0.192189	556	483	0.925666	-0.0335457	249	257	0.00555135	2.2556
CAAAGC	30	31	0.443818	0.352795	396	317	0.244568	-0.6116	209	169	1	0
CAAAGG	20	42	0.000774943	3.11073	321	310	0.21635	0.664843	213	190	0.316607	0.49948
CAAAGT	14	22	0.093003	1.0315	270	245	0.691129	0.160441	279	227	0.928776	0.0320888
CAAATA	8	16	0.062922	1.2012	204	172	0.756495	-0.121194	294	321	0.00018554	3.73156
CAAATC	12	17	0.19358	0.713139	249	191	0.18088	-0.74261	172	146	0.652229	0.1856
CAAATG	8	22	0.00292643	2.53366	358	349	0.152143	0.817747	295	270	0.13853	0.858458
CAAATT	13	16	0.354031	0.450959	195	209	0.0459374	1.33783	300	259	0.443769	0.352843
CAACAA	14	22	0.093003	1.0315	397	373	0.329499	0.482146	179	186	0.0176959	1.75213
CAACAC	14	19	0.221145	0.655323	198	203	0.120658	0.918443	131	129	0.118701	0.925547
CAACAG	25	31	0.179762	0.745302	439	391	0.807624	0.0927906	166	178	0.00914213	2.03895
CAACAT	13	14	0.566504	0.246797	276	275	0.134966	0.869775	190	159	0.746785	0.126804
CAACCA	15	20	0.234626	0.629624	300	315	0.0261231	1.58297	146	128	0.504164	0.297428
CAACCC	23	24	0.558648	0.252862	226	233	0.0833825	1.07893	111	106	0.219476	0.658614
CAACCG	11	7	0.640444	-0.193519	83	71	0.935684	-0.0288707	28	9	0.0129289	-1.88844
CAACCT	10	25	0.00332309	2.47846	271	292	0.0142303	1.84679	174	152	0.469643	0.328232
CAACGA	5	5	1	0	108	103	0.535463	0.27127	13	17	0.20191	0.694843
CAACGC	10	13	0.403172	0.39451	73	79	0.194242	0.711657	18	12	0.714536	-0.145976
CAACGG	15	14	0.85323	0.0689341	118	82	0.118828	-0.925083	22	17	1	0
CAACGT	6	2	0.302519	-0.519247	99	122	0.0124589	1.90452	28	32	0.194709	0.710615
CAACTA	10	7	0.80993	-0.0915525	145	142	0.344433	0.462895	106	85	1	0
CAACTC	24	19	0.879181	-0.0559219	211	224	0.0486615	1.31281	123	110	0.430062	0.366469
CAACTG	20	22	0.44024	0.35631	246	284	0.00146846	2.83314	142	154	0.0118304	1.927
CAACTT	24	22	0.882589	0.0542415	246	268	0.0132745	1.87698	192	167	0.490262	0.309572
CAAGAA	29	48	0.00408699	2.3886	658	589	0.691111	0.160452	244	241	0.0282341	1.54923
CAAGAC	18	30	0.0287164	1.54187	287	280	0.206596	0.684878	129	134	0.0407629	1.38974
CAAGAG	33	34	0.462654	0.334743	398	388	0.133197	0.875504	229	147	0.0332934	-1.47764
CAAGAT	16	17	0.601095	0.221057	343	325	0.313329	0.503999	196	144	0.413387	-0.383643
CAAGCA	22	20	0.877446	0.0567798	437	306	0.00286986	-2.54214	185	176	0.124625	0.904394
CAAGCC	21	31	0.0514431	1.28867	349	252	0.0197888	-1.70358	169	124	0.445116	-0.351527
CAAGCG	16	17	0.601095	0.221057	176	105	0.00183576	-2.73618	31	26	0.894738	0.0483043
CAAGCT	22	30	0.0954322	1.02031	333	285	0.808857	-0.0921285	167	135	1	0
CAAGGA	34	45	0.0545435	1.26326	543	530	0.0758591	1.11999	229	168	0.363706	-0.43925
CAAGGC	30	24	0.891847	-0.0497097	396	319	0.277079	-0.557396	137	143	0.03519	1.45358
CAAGGG	24	31	0.136488	0.864906	253	209	0.544689	-0.263852	154	136	0.443185	0.353415
CAAGGT	10	24	0.00514319	2.28877	269	264	0.192771	0.714958	150	129	0.630044	0.200629
CAAGTA	11	14	0.322913	0.490914	200	166	0.6374	-0.195588	171	150	0.465715	0.331879
CAAGTC	11	21	0.0320175	1.49461	240	230	0.331794	0.479131	123	89	0.448049	-0.348675
CAAGTG	22	29	0.123381	0.908752	343	260	0.0863554	-1.06371	209	169	1	0
CAAGTT	19	13	0.598318	-0.223068	238	226	0.402273	0.39548	208	182	0.444879	0.351758
CAATAA	8	11	0.359166	0.444705	134	148	0.0559646	1.25209	260	230	0.317508	0.498246
CAATAC	10	8	1	0	104	116	0.0787721	1.10363	84	94	0.0344731	1.46252
CAATAG	7	5	1	0	83	74	0.936325	0.0285735	92	113	0.00307981	2.51148
CAATAT	4	11	0.0386871	1.41243	119	151	0.0027332	2.56333	190	170	0.340029	0.468485
CAATCA	17	15	1	0	141	162	0.0182347	1.7391	132	116	0.523175	0.281353
CAATCC	15	13	1	0	136	119	1	0	91	75	0.937805	0.0278872
CAATCG	3	5	0.482718	0.316306	29	44	0.0251784	1.59897	11	13	0.413206	0.383833
CAATCT	11	15	0.242843	0.614674	122	125	0.225794	0.646288	127	114	0.436912	0.359606
CAATGA	16	9	0.422858	-0.373805	289	309	0.0155181	1.80916	167	151	0.310515	0.507918
CAATGC	6	3	0.521208	-0.282989	176	210	0.00257277	2.5896	106	109	0.0748956	1.12554
CAATGG	15	16	0.590167	0.229025	274	287	0.0343176	1.46448	95	138	8.94039e-06	5.04864
CAATGT	7	13	0.114945	0.939509	192	195	0.153606	0.813592	213	168	0.836888	-0.0773325
CAATTA	4	12	0.0232383	1.6338	111	127	0.0437882	1.35864	142	157	0.00734954	2.13374
CAATTC	7	16	0.034074	1.46758	126	173	0.000123139	3.9096	145	120	0.853052	0.0690247
CAATTG	14	11	1	0	109	120	0.0852148	1.06949	112	111	0.138195	0.859509
CAATTT	20	11	0.282315	-0.549267	132	171	0.000810306	3.09135	278	241	0.42678	0.369796
CACAAA	12	27	0.00363616	2.43936	299	254	0.733311	-0.134712	249	260	0.00372525	2.42884
CACAAC	13	20	0.11485	0.939867	209	191	0.688547	0.162066	102	110	0.0380166	1.42003
CACAAG	9	26	0.000970103	3.01318	345	249	0.0212129	-1.6734	178	149	0.738913	0.131407
CACAAT	14	9	0.539532	-0.267983	140	153	0.0608828	1.21551	135	133	0.110017	0.95854
CACACA	28	49	0.00190514	2.72007	340	195	2.14145e-06	-5.66929	365	473	7.8742e-12	11.1038
CACACC	21	33	0.0284143	1.54646	293	225	0.14614	-0.83523	179	177	0.0550695	1.25909
CACACG	15	16	0.590167	0.229025	113	78	0.110854	-0.955248	70	56	1	0
CACACT	21	27	0.150884	0.821358	352	180	2.17472e-09	-8.6626	214	153	0.270223	-0.568278
CACAGA	37	45	0.12027	0.919843	458	423	0.437293	0.359228	241	251	0.00488463	2.31117
CACAGC	42	37	0.910263	0.0408332	437	387	0.888913	0.0511408	194	231	6.09979e-05	4.21468
CACAGG	26	44	0.00544346	2.26413	367	285	0.13574	-0.867291	231	192	0.7693	0.113904
CACAGT	16	36	0.000753037	3.12318	301	250	0.550179	-0.259496	243	172	0.199254	-0.700593
CACATA	5	10	0.123968	0.906689	117	92	0.446786	-0.349901	181	167	0.215134	0.667291
CACATC	17	23	0.15459	0.81082	277	228	0.503677	-0.297848	136	129	0.194596	0.710866
CACATG	5	20	0.000872468	3.05925	275	191	0.013863	-1.85814	195	184	0.133978	0.872968
CACATT	17	18	0.611474	0.213622	166	196	0.00516483	2.28694	302	254	0.638929	0.194547
CACCAA	20	20	0.636142	0.196446	400	369	0.469858	0.328034	142	158	0.00624629	2.20438
CACCAC	31	38	0.146734	0.83347	429	356	0.47429	-0.323956	242	176	0.301882	-0.520163
CACCAG	39	36	0.729191	0.137159	634	419	7.27291e-06	-5.13829	220	171	0.722136	-0.141381
CACCAT	16	18	0.491836	0.30818	304	348	0.000629461	3.20103	206	182	0.385407	0.41408
CACCCA	34	42	0.107484	0.968654	409	335	0.377872	-0.422656	231	197	0.592791	0.227099
CACCCC	65	50	0.64053	-0.19346	405	262	0.000138831	-3.85752	236	222	0.100153	0.999337
CACCCG	52	30	0.0971415	-1.0126	161	106	0.0231906	-1.63469	50	39	0.915363	-0.0384065
CACCCT	48	51	0.268393	0.571229	304	250	0.469458	-0.328403	214	203	0.103957	0.983147
CACCGA	18	11	0.458366	-0.338787	119	116	0.432839	0.363674	22	31	0.0523046	1.28146
CACCGC	77	47	0.0864663	-1.06315	175	108	0.00419218	-2.37756	48	33	0.504295	-0.297315
CACCGG	38	22	0.194668	-0.710706	195	121	0.0027825	-2.55556	41	28	0.545876	-0.262906
CACCGT	17	9	0.325609	-0.487303	103	101	0.440383	0.356169	53	35	0.391819	-0.406915
CACCTA	13	10	0.838206	-0.0766492	162	142	1	0	111	95	0.674751	0.170856
CACCTC	43	50	0.144833	0.839133	403	303	0.0456196	-1.34085	234	174	0.42593	-0.370662
CACCTG	42	52	0.0779327	1.10828	436	368	0.620727	-0.2071	264	228	0.468111	0.329651
CACCTT	22	28	0.15795	0.801482	304	253	0.58089	-0.235906	237	186	0.806872	-0.0931953
CACGAA	8	9	0.630371	0.200404	98	62	0.0475381	-1.32296	33	19	0.266135	-0.574899
CACGAC	13	8	0.518759	-0.285034	90	54	0.0297035	-1.52719	15	23	0.0516117	1.28725
CACGAG	20	12	0.379173	-0.421163	112	93	0.726747	-0.138617	42	36	0.82033	0.0860115
CACGAT	5	5	1	0	47	40	0.91487	-0.0386404	43	16	0.00826218	-2.08291
CACGCA	14	14	0.706963	0.150603	84	71	0.872213	-0.0593773	41	48	0.0878355	1.05633
CACGCC	34	26	0.795801	-0.0991957	159	105	0.0262606	-1.58069	79	45	0.0704763	-1.15196
CACGCG	18	18	0.620693	0.207123	40	41	0.505061	0.296656	11	13	0.413206	0.383833
CACGCT	15	19	0.301816	0.520258	99	103	0.230803	0.636758	37	32	0.809202	0.0919432
CACGGA	20	19	0.749826	0.125039	149	137	0.678727	0.168305	40	24	0.260784	-0.583719
CACGGC	42	19	0.0209987	-1.67781	150	115	0.295648	-0.529225	27	41	0.0102978	1.98726
CACGGG	23	16	0.630736	-0.200152	164	109	0.0287916	-1.54073	41	36	0.731894	0.135552
CACGGT	14	11	1	0	71	82	0.0891822	1.04972	42	28	0.472053	-0.326009
CACGTA	7	4	0.564125	-0.248625	29	32	0.372262	0.429151	38	31	1	0
CACGTC	15	5	0.0730485	-1.13639	92	85	0.763263	0.117326	39	31	1	0
CACGTG	16	11	0.700614	-0.154521	95	116	0.0187601	1.72677	74	59	1	0
CACGTT	12	10	1	0	61	44	0.378787	-0.421605	51	43	0.836355	0.0776093
CACTAA	10	9	1	0	102	79	0.456381	-0.340672	125	120	0.177502	0.750798
CACTAC	8	5	0.782351	-0.106599	160	129	0.516758	-0.286713	97	78	1	0
CACTAG	10	12	0.522056	0.282283	82	59	0.272771	-0.564202	104	75	0.498824	-0.302053
CACTAT	5	6	0.763986	0.116915	92	105	0.0636192	1.19641	122	115	0.2398	0.620151
CACTCA	16	25	0.0598502	1.22293	225	196	1	0	143	140	0.106547	0.972457
CACTCC	26	31	0.231467	0.635511	232	166	0.0499848	-1.30116	196	148	0.55135	-0.258573
CACTCG	22	21	0.760287	0.119023	103	68	0.0777429	-1.10934	32	25	1	0
CACTCT	25	20	0.882154	-0.0544557	155	179	0.0116145	1.935	189	169	0.338824	0.470026
CACTGA	34	35	0.468886	0.328932	258	272	0.0328744	1.48314	235	204	0.442834	0.353759
CACTGC	45	38	1	0	316	309	0.172781	0.762505	307	216	0.134673	-0.870718
CACTGG	24	32	0.107069	0.970336	474	318	0.000239448	-3.62079	236	170	0.272212	-0.565092
CACTGT	22	25	0.379975	0.420245	238	238	0.154329	0.811553	305	233	0.543946	-0.264445
CACTTA	8	8	0.804932	0.0942406	126	88	0.114905	-0.939663	174	134	0.730983	-0.136092
CACTTC	32	29	0.798626	0.0976567	241	220	0.674427	0.171065	205	155	0.560056	-0.251768
CACTTG	30	28	0.792413	0.101048	197	158	0.425233	-0.371373	240	186	0.696829	-0.156874
CACTTT	18	20	0.419744	0.377016	187	196	0.0815756	1.08844	435	309	0.0897883	-1.04678
CAGAAA	49	59	0.0816424	1.08808	629	601	0.129696	0.887075	403	392	0.00914928	2.03861
CAGAAC	35	26	0.700248	-0.154748	414	314	0.0580759	-1.236	187	166	0.391679	0.407069
CAGAAG	47	61	0.0331191	1.47992	754	691	0.384143	0.415507	331	270	0.902057	0.0447662
CAGAAT	16	17	0.601095	0.221057	346	359	0.0258432	1.58765	298	269	0.19027	0.720629
CAGACA	33	37	0.280288	0.552396	411	396	0.179902	0.744965	217	195	0.275945	0.559177
CAGACC	36	38	0.352804	0.452467	338	265	0.19142	-0.718013	150	138	0.285991	0.543647
CAGACG	30	26	1	0	131	102	0.393687	-0.404849	36	26	0.70314	-0.152958
CAGACT	26	29	0.344207	0.46318	316	263	0.559907	-0.251884	200	156	0.789859	-0.10245
CAGAGA	46	62	0.0200256	1.69842	696	587	0.519751	-0.284205	292	255	0.36644	0.435998
CAGAGC	90	72	0.752709	-0.123373	544	366	9.89579e-05	-4.00455	239	186	0.732833	-0.134995
CAGAGG	53	69	0.0182087	1.73972	556	434	0.0744407	-1.12819	244	235	0.0535643	1.27112
CAGAGT	31	33	0.381474	0.418535	316	249	0.22148	-0.654665	207	208	0.0262272	1.58125
CAGATA	8	15	0.0919743	1.03633	196	200	0.130841	0.883258	176	169	0.116153	0.934968
CAGATC	21	24	0.36979	0.432045	340	286	0.630859	-0.200068	134	111	0.847305	0.0719603
CAGATG	16	23	0.109445	0.960804	526	521	0.0473266	1.32489	274	198	0.247188	-0.606973
CAGATT	18	28	0.0533049	1.27323	288	234	0.404826	-0.392732	246	195	0.885766	-0.0526811
CAGCAA	24	32	0.107069	0.970336	590	468	0.115954	-0.935714	231	168	0.314226	-0.502757
CAGCAC	37	36	0.559322	0.252338	538	358	5.71177e-05	-4.24323	208	202	0.0659077	1.18106
CAGCAG	112	98	0.835515	0.0780457	1320	790	1.13274e-17	-16.9459	302	267	0.273259	0.563426
CAGCAT	22	16	0.745395	-0.127614	409	342	0.558382	-0.253069	229	218	0.0866217	1.06237
CAGCCA	72	72	0.357536	0.44668	758	518	1.33002e-05	-4.87614	235	232	0.0321353	1.49302
CAGCCC	126	117	0.479265	0.319424	746	467	1.11397e-08	-7.95313	272	249	0.158382	0.800295
CAGCCG	92	60	0.12206	-0.913425	318	193	5.27051e-05	-4.27815	52	51	0.323549	0.49006
CAGCCT	78	81	0.203462	0.691517	674	471	0.000166599	-3.77833	393	314	0.90968	-0.0411116
CAGCGA	43	24	0.111126	-0.954185	251	134	3.01728e-06	-5.52038	28	27	0.587868	0.23072
CAGCGC	101	58	0.020674	-1.68457	283	145	8.63469e-08	-7.06375	37	35	0.553784	0.25666
CAGCGG	126	55	2.58607e-05	-4.58736	302	227	0.0891037	-1.0501	49	46	0.47152	0.3265
CAGCGT	23	21	0.880063	0.0554862	153	121	0.431305	-0.365215	53	33	0.278212	-0.555624
CAGCTA	13	27	0.00668908	2.17463	222	197	0.921997	0.0352703	191	168	0.426001	0.370589
CAGCTC	77	69	0.740355	0.13056	565	453	0.166902	-0.777538	226	203	0.264498	0.577577
CAGCTG	73	78	0.16498	0.782568	760	683	0.616108	0.210343	317	262	0.769966	0.113528
CAGCTT	45	41	0.746515	0.126961	403	311	0.0988022	-1.00523	267	233	0.392754	0.40588
CAGGAA	55	48	0.921335	0.0355822	517	522	0.0213579	1.67044	310	225	0.240296	-0.619253
CAGGAC	52	50	0.551618	0.258362	413	310	0.0440182	-1.35637	170	136	0.954214	-0.0203542
CAGGAG	81	92	0.0563889	1.24881	714	555	0.0372454	-1.42893	341	294	0.402143	0.395619
CAGGAT	27	20	0.664198	-0.177702	268	282	0.0325193	1.48786	186	162	0.483614	0.315501
CAGGCA	48	52	0.229271	0.639651	384	313	0.362223	-0.441024	243	214	0.347155	0.459476
CAGGCC	73	53	0.421537	-0.375165	428	374	1	0	210	213	0.0188695	1.72424
CAGGCG	64	42	0.206292	-0.685517	164	91	0.000424933	-3.37168	90	66	0.573872	-0.241185
CAGGCT	45	54	0.0868411	1.06127	326	285	1	0	287	267	0.0955771	1.01965
CAGGGA	46	45	0.52841	0.277029	378	349	0.480047	0.318716	281	241	0.508992	0.293289
CAGGGC	74	57	0.600154	-0.221737	364	254	0.00606172	-2.2174	213	201	0.113705	0.944219
CAGGGG	71	44	0.111645	-0.952161	283	225	0.286151	-0.543405	192	173	0.292776	0.533465
CAGGGT	27	24	0.888929	0.051133	179	145	0.504316	-0.297297	218	163	0.471113	-0.326875
CAGGTA	12	16	0.258128	0.588166	108	103	0.535463	0.27127	168	100	0.0164713	-1.78327
CAGGTC	32	26	0.896018	-0.0476835	222	221	0.182423	0.738921	157	110	0.268182	-0.57157
CAGGTG	24	49	0.000354194	3.45076	371	331	0.820439	0.0859536	266	212	0.926698	-0.0330618
CAGGTT	26	16	0.354659	-0.45019	207	154	0.139531	-0.855329	207	130	0.0282397	-1.54914
CAGTAA	7	22	0.00127601	2.89415	183	138	0.198227	-0.702837	213	162	0.603528	-0.219303
CAGTAC	8	11	0.359166	0.444705	218	163	0.136405	-0.865169	116	76	0.168049	-0.774564
CAGTAG	14	13	0.848574	0.0713104	149	102	0.0577301	-1.2386	185	136	0.43205	-0.364466
CAGTAT	9	2	0.0754437	-1.12238	201	170	0.755099	-0.121996	257	162	0.0139726	-1.85472
CAGTCA	16	32	0.00535119	2.27155	335	250	0.056685	-1.24653	181	150	0.82506	0.0835146
CAGTCC	46	36	0.740919	-0.130229	314	205	0.00111173	-2.954	158	125	0.904865	-0.0434164
CAGTCG	27	15	0.216436	-0.66467	98	76	0.447984	-0.348738	30	20	0.570588	-0.243678
CAGTCT	34	22	0.350066	-0.45585	260	203	0.226158	-0.645589	248	153	0.00896855	-2.04728
CAGTGA	37	38	0.418994	0.377793	573	424	0.00919466	-2.03646	306	265	0.400051	0.397885
CAGTGC	37	27	0.616555	-0.210028	429	326	0.0577471	-1.23847	202	141	0.192705	-0.715106
CAGTGG	55	29	0.0378207	-1.42227	559	441	0.105921	-0.97502	335	229	0.056555	-1.24753
CAGTGT	25	28	0.335972	0.473697	385	304	0.181553	-0.740996	304	220	0.23538	-0.628231
CAGTTA	8	15	0.0919743	1.03633	170	121	0.0882932	-1.05407	185	161	0.48256	0.316448
CAGTTC	24	21	1	0	337	247	0.0344115	-1.4633	233	165	0.207662	-0.682644
CAGTTG	25	23	0.774401	0.111034	264	201	0.137207	-0.862622	238	153	0.028709	-1.54198
CAGTTT	26	33	0.150046	0.823776	325	290	0.808541	0.092298	427	272	0.00231628	-2.63521
CATAAA	8	20	0.00747872	2.12617	142	141	0.311119	0.507073	238	249	0.00465893	2.33171
CATAAC	7	10	0.334487	0.47562	61	69	0.159482	0.797287	105	95	0.434344	0.362166
CATAAG	7	5	1	0	92	120	0.0046515	2.33241	136	102	0.602293	-0.220192
CATAAT	3	7	0.202642	0.693271	78	83	0.236059	0.62698	185	186	0.0365873	1.43667
CATACA	8	12	0.262429	0.580988	139	142	0.209214	0.67941	145	173	0.000559421	3.25226
CATACC	7	6	1	0	143	83	0.00266802	-2.57381	106	78	0.553838	-0.256617
CATACG	4	4	1	0	33	29	1	0	25	21	0.88349	0.0537986
CATACT	3	14	0.00278374	2.55537	167	148	0.910224	0.0408516	167	130	0.770777	-0.113071
CATAGA	6	16	0.0166465	1.77868	128	133	0.172452	0.763331	158	134	0.680569	0.167128
CATAGC	12	9	0.830003	-0.0809204	81	58	0.269179	-0.569958	91	101	0.0292619	1.5337
CATAGG	6	5	1	0	58	69	0.0910407	1.04076	115	83	0.474892	-0.323406
CATAGT	11	3	0.104561	-0.980631	72	59	0.726899	-0.138526	139	115	0.850009	0.0705763
CATATA	5	8	0.278822	0.554672	72	87	0.0466929	1.33075	191	191	0.039383	1.40469
CATATC	2	7	0.0898873	1.0463	82	103	0.014953	1.82527	108	97	0.440758	0.3558
CATATG	3	7	0.202642	0.693271	138	109	0.444386	-0.35224	168	147	0.496508	0.304074
CATATT	9	11	0.502648	0.298736	132	126	0.493016	0.307139	260	235	0.205862	0.686425
CATCAA	9	11	0.502648	0.298736	372	384	0.0237732	1.62391	137	137	0.0780659	1.10754
CATCAC	18	15	1	0	294	324	0.00418851	2.37794	159	130	0.905969	0.0428867
CATCAG	14	20	0.167749	0.775341	551	380	0.000338356	-3.47063	204	181	0.35642	0.448037
CATCAT	13	18	0.207453	0.683081	323	352	0.00481709	2.31722	173	170	0.0729455	1.137
CATCCA	17	12	0.711186	-0.148017	407	357	1	0	140	173	0.000169079	3.77191
CATCCC	36	35	0.634074	0.19786	292	224	0.145314	-0.837692	188	137	0.372583	-0.428777
CATCCG	15	13	1	0	131	132	0.266071	0.575002	15	21	0.13026	0.885189
CATCCT	19	33	0.0120049	1.92064	303	370	1.72622e-05	4.7629	222	191	0.520186	0.283841
CATCGA	6	1	0.134022	-0.872822	140	154	0.0536148	1.27072	16	16	0.595725	0.224954
CATCGC	18	13	0.720948	-0.142096	117	104	0.946272	0.0239842	16	36	0.000410438	3.38675
CATCGG	13	8	0.518759	-0.285034	109	101	0.678906	0.16819	25	23	0.6655	0.176852
CATCGT	12	5	0.225451	-0.646949	95	117	0.0132167	1.87888	28	30	0.292788	0.533447
CATCTA	8	10	0.481348	0.317541	143	162	0.0251685	1.59914	112	138	0.000907971	3.04193
CATCTC	22	29	0.123381	0.908752	308	282	0.591787	0.227835	210	201	0.0826803	1.0826
CATCTG	24	28	0.267235	0.573106	325	316	0.191338	0.7182	267	193	0.26033	-0.584476
CATCTT	28	23	1	0	284	302	0.0203202	1.69207	300	229	0.540564	-0.267153
CATGAA	14	18	0.287633	0.541162	401	336	0.579685	-0.236808	242	190	0.808847	-0.0921337
CATGAC	7	10	0.334487	0.47562	184	172	0.559066	0.252537	108	119	0.019417	1.71182
CATGAG	18	13	0.720948	-0.142096	243	219	0.779667	0.108091	164	172	0.0181564	1.74097
CATGAT	6	5	1	0	192	213	0.0191236	1.71843	183	172	0.149858	0.82432
CATGCA	7	17	0.0221526	1.65457	287	180	0.000416354	-3.38054	172	177	0.0236863	1.6255
CATGCC	14	23	0.049037	1.30948	231	196	0.77112	-0.112878	194	139	0.295311	-0.52972
CATGCG	9	5	0.594164	-0.226094	74	54	0.330447	-0.480898	38	31	1	0
CATGCT	9	15	0.106482	0.972722	249	245	0.206622	0.684823	198	193	0.0669057	1.17454
CATGGA	13	19	0.155385	0.808592	403	413	0.0246868	1.60753	205	184	0.307737	0.51182
CATGGC	17	18	0.611474	0.213622	300	256	0.798699	-0.0976171	135	128	0.193158	0.714087
CATGGG	9	12	0.381998	0.417939	230	204	0.923352	0.0346326	201	146	0.358666	-0.445309
CATGGT	5	12	0.0508501	1.29371	187	194	0.100375	0.998375	217	157	0.323017	-0.490774
CATGTA	5	11	0.0801004	1.09637	115	114	0.354328	0.450594	225	196	0.433198	0.363314
CATGTC	9	11	0.502648	0.298736	202	165	0.530287	-0.275489	143	115	1	0
CATGTG	11	20	0.0463592	1.33386	257	215	0.644655	-0.190673	256	211	0.816135	0.0882381
CATGTT	15	16	0.590167	0.229025	173	171	0.279745	0.553237	328	253	0.616554	-0.210029
CATTAA	8	11	0.359166	0.444705	152	128	0.764826	-0.116437	278	241	0.42678	0.369796
CATTAC	7	6	1	0	133	140	0.129679	0.887132	116	88	0.673408	-0.171722
CATTAG	9	12	0.381998	0.417939	80	82	0.344746	0.462501	134	121	0.378227	0.422247
CATTAT	7	14	0.0777298	1.10941	111	131	0.0204067	1.69023	225	222	0.0361883	1.44143
CATTCA	17	19	0.409179	0.388086	283	241	0.75944	-0.119507	200	236	7.5245e-05	4.12352
CATTCC	22	17	0.872761	-0.0591048	239	172	0.053725	-1.26982	232	154	0.0651897	-1.18582
CATTCG	13	4	0.0870303	-1.06033	75	50	0.151382	-0.819927	29	27	0.593927	0.226267
CATTCT	20	32	0.0257978	1.58842	212	211	0.188486	0.72472	300	230	0.570297	-0.243899
CATTGA	20	12	0.379173	-0.421163	243	301	6.17023e-05	4.2097	220	183	0.763874	0.116978
CATTGC	12	21	0.0532515	1.27367	177	194	0.0327599	1.48466	160	148	0.229366	0.639472
CATTGG	15	20	0.234626	0.629624	173	206	0.00280506	2.55206	169	127	0.559263	-0.252384
CATTGT	17	9	0.325609	-0.487303	173	187	0.050474	1.29693	303	209	0.0830452	-1.08069
CATTTA	7	18	0.0142526	1.84611	172	181	0.087754	1.05673	393	314	0.90968	-0.0411116
CATTTC	28	31	0.360517	0.443074	212	241	0.00544637	2.26389	376	302	0.969195	-0.0135887
CATTTG	22	24	0.459834	0.337399	243	208	0.850278	-0.0704392	386	325	0.571613	0.242898
CATTTT	50	41	0.916464	-0.0378848	214	265	0.000167359	3.77635	721	646	0.0532988	1.27328
CCAAAA	21	25	0.30033	0.522401	384	290	0.0585486	-1.23248	300	248	0.796562	0.0987804
CCAAAC	18	23	0.211114	0.675484	257	212	0.547446	-0.261658	160	146	0.300643	0.521949
CCAAAG	30	47	0.00831897	2.07993	437	377	0.86056	-0.0652188	282	224	0.893299	-0.0490033
CCAAAT	3	29	2.13127e-07	6.67136	254	219	0.890084	-0.0505691	246	227	0.151566	0.819397
CCAACA	19	22	0.348855	0.457355	334	303	0.662287	0.178954	169	173	0.0294682	1.53065
CCAACC	19	16	1	0	288	266	0.551058	0.258803	140	125	0.422109	0.374575
CCAACG	11	8	0.820675	-0.0858289	112	108	0.499371	0.301576	25	21	0.88349	0.0537986
CCAACT	20	17	1	0	253	255	0.119491	0.922666	141	140	0.0820894	1.08571
CCAAGA	35	41	0.167941	0.774842	482	500	0.0079054	2.10208	227	202	0.308312	0.511009
CCAAGC	26	28	0.41368	0.383336	419	276	0.000256322	-3.59121	159	139	0.485192	0.314086
CCAAGG	41	46	0.19777	0.703839	508	418	0.356425	-0.448032	209	206	0.0428682	1.36786
CCAAGT	19	25	0.173102	0.761697	310	280	0.710457	0.148462	183	163	0.358463	0.445556
CCAATA	7	8	0.611237	0.21379	116	111	0.506619	0.295319	114	123	0.0262554	1.58078
CCAATC	13	16	0.354031	0.450959	139	117	0.802204	-0.095715	87	78	0.531213	0.274731
CCAATG	14	12	1	0	251	258	0.0754331	1.12244	122	120	0.136796	0.863927
CCAATT	14	12	1	0	129	154	0.0102876	1.98769	149	139	0.235782	0.62749
CCACAA	7	19	0.00569772	2.2443	309	263	0.769258	-0.113928	152	142	0.218055	0.661434
CCACAC	24	32	0.107069	0.970336	344	198	2.03193e-06	-5.69209	191	161	0.7075	0.150274
CCACAG	37	42	0.21441	0.668754	472	410	0.919373	-0.036508	229	229	0.0239468	1.62075
CCACAT	11	17	0.130707	0.8837	239	226	0.40327	0.394404	182	182	0.0449677	1.3471
CCACCA	44	50	0.17812	0.749286	611	454	0.00823152	-2.08452	293	233	0.895344	-0.0480103
CCACCC	84	61	0.404595	-0.39298	484	310	1.61752e-05	-4.79115	287	264	0.123109	0.90971
CCACCG	65	33	0.0192358	-1.71589	208	146	0.0428642	-1.36791	60	49	1	0
CCACCT	42	51	0.0954716	1.02013	496	331	0.000123825	-3.90719	325	214	0.0216066	-1.66541
CCACGA	18	17	0.865615	0.0626752	123	89	0.190796	-0.71943	30	28	0.599182	0.222441
CCACGC	29	22	0.779195	-0.108354	129	103	0.510829	-0.291724	62	37	0.157492	-0.802741
CCACGG	32	26	0.896018	-0.0476835	171	156	0.739522	0.131049	48	38	1	0
CCACGT	19	10	0.264907	-0.576906	96	103	0.155686	0.807751	68	47	0.453495	-0.343427
CCACTA	11	10	1	0	116	121	0.192794	0.714907	87	89	0.129194	0.888758
CCACTC	23	36	0.0255164	1.59318	232	183	0.301732	-0.520378	150	133	0.437316	0.359204
CCACTG	39	43	0.26766	0.572417	336	334	0.103795	0.983825	304	229	0.458878	-0.338303
CCACTT	30	18	0.310577	-0.507831	217	171	0.309284	-0.509642	242	157	0.0343911	-1.46355
CCAGAA	39	46	0.128948	0.889584	612	554	0.576965	0.23885	283	229	1	0
CCAGAC	37	46	0.0978634	1.00938	308	308	0.0979134	1.00916	158	128	1	0
CCAGAG	64	65	0.331107	0.480031	643	467	0.00213649	-2.6703	256	225	0.359045	0.444851
CCAGAT	19	31	0.0233486	1.63174	358	338	0.32331	0.490381	165	155	0.17738	0.751096
CCAGCA	42	63	0.00431137	2.36539	815	527	4.89047e-08	-7.31065	297	257	0.416916	0.379952
CCAGCC	120	112	0.468941	0.328882	772	461	5.47829e-11	-10.2614	317	274	0.408051	0.389286
CCAGCG	79	49	0.0919539	-1.03643	309	180	1.27142e-05	-4.89571	52	44	0.837772	0.0768743
CCAGCT	63	65	0.287199	0.541818	569	479	0.53582	-0.270981	302	235	0.696152	-0.157296
CCAGGA	82	84	0.242483	0.615318	610	599	0.0466111	1.33151	317	245	0.64071	-0.193339
CCAGGC	91	73	0.754312	-0.122449	485	370	0.0467977	-1.32978	298	306	0.00317996	2.49758
CCAGGG	70	56	0.788853	-0.103004	420	329	0.133299	-0.875172	277	219	0.856649	-0.0671971
CCAGGT	31	31	0.526324	0.278746	278	282	0.0824794	1.08365	213	175	0.878279	0.0563677
CCAGTA	12	5	0.225451	-0.646949	230	177	0.214148	-0.669286	150	106	0.314689	-0.502119
CCAGTC	45	31	0.420907	-0.375814	312	203	0.00106125	-2.97418	161	114	0.302681	-0.519014
CCAGTG	38	36	0.642408	0.192189	533	400	0.0215408	-1.66674	293	195	0.0403382	-1.39428
CCAGTT	28	24	1	0	354	247	0.00614111	-2.21175	253	180	0.208823	-0.680222
CCATAA	7	12	0.167231	0.776684	109	102	0.629836	0.200773	135	129	0.17347	0.760777
CCATAC	6	9	0.307768	0.511777	128	98	0.350641	-0.455138	95	77	1	0
CCATAG	9	8	1	0	91	92	0.33625	0.473338	114	98	0.67863	0.168367
CCATAT	6	7	0.589589	0.229451	147	132	0.857208	0.0669136	144	128	0.428422	0.368129
CCATCA	13	19	0.155385	0.808592	417	401	0.18291	0.737764	181	142	0.823023	-0.0845883
CCATCC	26	28	0.41368	0.383336	335	313	0.408505	0.388802	199	165	0.792346	0.101085
CCATCG	12	5	0.225451	-0.646949	120	146	0.00812316	2.09027	30	37	0.0861926	1.06453
CCATCT	27	28	0.499525	0.301443	294	275	0.449427	0.34734	259	190	0.342394	-0.465474
CCATGA	14	7	0.280414	-0.552201	332	293	0.936096	0.0286795	165	160	0.1055	0.976747
CCATGC	11	18	0.0937581	1.02799	258	226	1	0	160	144	0.356087	0.448444
CCATGG	16	12	0.85045	-0.0703511	378	348	0.50319	0.298268	198	164	0.83255	0.0795895
CCATGT	9	17	0.0502745	1.29865	220	196	0.882819	0.0541282	232	208	0.270364	0.568051
CCATTA	9	17	0.0502745	1.29865	117	119	0.267384	0.572864	158	133	0.723799	0.140382
CCATTC	18	19	0.514032	0.28901	210	186	0.919805	0.0363041	195	132	0.132986	-0.876193
CCATTG	25	13	0.192309	-0.716001	212	209	0.222404	0.652858	189	152	1	0
CCATTT	36	27	0.70497	-0.151829	195	249	7.58959e-05	4.11978	383	315	0.819296	0.0865591
CCCAAA	17	39	0.000405193	3.39234	317	268	0.70918	-0.149244	266	227	0.555914	0.254992
CCCAAC	30	24	0.891847	-0.0497097	260	228	1	0	144	129	0.394483	0.403972
CCCAAG	35	40	0.203726	0.690953	494	346	0.00145264	-2.83784	214	184	0.545218	0.26343
CCCAAT	12	10	1	0	150	158	0.109768	0.959526	103	117	0.0119867	1.9213
CCCACA	23	36	0.0255164	1.59318	317	245	0.150538	-0.822355	198	191	0.0828102	1.08192
CCCACC	87	70	0.810164	-0.0914271	518	261	1.00436e-13	-12.9981	341	296	0.359449	0.444362
CCCACG	32	21	0.409342	-0.387914	136	120	0.950142	0.0222113	52	39	0.752908	-0.123258
CCCACT	27	31	0.291773	0.534954	243	196	0.416125	-0.380776	210	184	0.41779	0.379042
CCCAGA	54	58	0.218336	0.660875	535	467	0.974744	-0.0111095	254	220	0.459774	0.337456
CCCAGC	121	107	0.790337	0.102188	765	447	6.20806e-12	-11.207	375	284	0.433334	-0.363177
CCCAGG	104	94	0.668902	0.174637	582	444	0.0307555	-1.51208	414	353	0.445734	0.350924
CCCAGT	44	27	0.192439	-0.715707	385	258	0.000887379	-3.05189	230	174	0.548241	-0.261029
CCCATA	8	10	0.481348	0.317541	96	85	0.940767	0.0265179	105	91	0.615875	0.210508
CCCATC	23	17	0.751907	-0.123836	306	233	0.110331	-0.957301	184	159	0.550277	0.259419
CCCATG	8	13	0.188133	0.725535	305	223	0.0446832	-1.34986	171	185	0.00646605	2.18936
CCCATT	21	20	0.755144	0.12197	161	165	0.165127	0.782181	209	200	0.0906901	1.04244
CCCCAA	37	29	0.805524	-0.0939217	380	281	0.0320421	-1.49428	206	184	0.333155	0.477353
CCCCAC	60	57	0.577949	0.238111	396	222	7.36472e-08	-7.13284	303	244	1	0
CCCCAG	99	84	1	0	690	437	1.00264e-07	-6.99885	335	260	0.650288	-0.186894
CCCCAT	22	20	0.877446	0.0567798	277	213	0.160497	-0.794533	198	175	0.376549	0.424178
CCCCCA	74	53	0.373826	-0.42733	501	262	5.52166e-12	-11.2579	264	225	0.554417	0.256164
CCCCCC	85	42	0.00420754	-2.37597	271	95	4.31148e-16	-15.3654	196	103	0.000374352	-3.42672
CCCCCG	119	47	5.01203e-06	-5.29999	264	115	1.18337e-10	-9.92688	72	53	0.653313	-0.184879
CCCCCT	89	51	0.0272178	-1.56515	325	187	3.82865e-06	-5.41695	206	162	0.833956	-0.0788567
CCCCGA	56	26	0.0105879	-1.97519	241	129	5.27355e-06	-5.2779	42	35	0.909085	0.0413956
CCCCGC	207	107	2.55769e-05	-4.59215	251	130	7.40967e-07	-6.1302	89	57	0.183386	-0.736633
CCCCGG	164	79	2.59938e-05	-4.58513	285	184	0.00137921	-2.86037	60	63	0.14749	0.831238
CCCCGT	25	17	0.537648	-0.269502	101	66	0.0741397	-1.12995	69	52	0.783973	-0.105699
CCCCTA	22	18	1	0	159	87	0.000418125	-3.37869	97	84	0.654082	0.184368
CCCCTC	139	87	0.0274771	-1.56103	371	223	8.43871e-06	-5.07372	280	200	0.198607	-0.702005
CCCCTG	75	51	0.245391	-0.610141	469	332	0.00325865	-2.48696	256	230	0.235808	0.627442
CCCCTT	52	39	0.599861	-0.221949	200	159	0.369108	-0.432847	241	181	0.493072	-0.30709
CCCGAA	23	14	0.409884	-0.387339	130	78	0.00820405	-2.08597	21	16	1	0
CCCGAC	35	24	0.436907	-0.359611	133	98	0.210285	-0.677191	38	21	0.190415	-0.7203
CCCGAG	95	44	0.000837844	-3.07684	268	153	2.02366e-05	-4.69386	69	45	0.30021	-0.522575
CCCGAT	12	13	0.553692	0.256732	65	47	0.344199	-0.46319	26	19	0.766806	-0.115314
CCCGCA	63	47	0.566094	-0.247111	173	108	0.00588583	-2.23019	33	41	0.0787384	1.10381
CCCGCC	218	87	7.41885e-10	-9.12966	268	139	3.54439e-07	-6.45046	99	76	0.761593	-0.118277
CCCGCG	144	95	0.0597713	-1.22351	140	67	3.54767e-05	-4.45006	24	14	0.415084	-0.381864
CCCGCT	76	42	0.0265039	-1.57669	173	107	0.00480651	-2.31817	54	34	0.284207	-0.546366
CCCGGA	91	47	0.00606495	-2.21717	209	152	0.0912419	-1.03981	48	37	0.91323	-0.0394198
CCCGGC	214	101	7.3703e-07	-6.13252	316	170	1.95814e-07	-6.70816	73	59	1	0
CCCGGG	165	96	0.00342476	-2.46537	276	196	0.0267038	-1.57343	84	71	0.808635	0.0922476
CCCGGT	41	25	0.217313	-0.662914	93	64	0.149975	-0.82398	28	18	0.55351	-0.256874
CCCGTA	14	6	0.182028	-0.739863	30	23	0.680995	-0.166856	23	21	0.76217	0.117948
CCCGTC	34	20	0.219814	-0.657944	105	58	0.00463149	-2.33428	51	33	0.38008	-0.420125
CCCGTG	25	18	0.648231	-0.18827	115	105	0.787041	0.104003	71	59	0.860541	0.0652287
CCCGTT	18	10	0.344435	-0.462893	56	48	0.922139	-0.0352035	40	24	0.260784	-0.583719
CCCTAA	13	14	0.566504	0.246797	113	100	0.945341	0.0244116	118	118	0.10181	0.992208
CCCTAC	13	10	0.838206	-0.0766492	221	166	0.139727	-0.85472	114	75	0.18779	-0.726329
CCCTAG	21	28	0.11703	0.931702	99	60	0.0258679	-1.58724	116	96	0.890159	0.0505326
CCCTAT	9	13	0.284678	0.545647	240	117	1.2557e-07	-6.90111	101	86	0.7137	0.146484
CCCTCA	38	44	0.183234	0.736994	366	268	0.0284744	-1.54554	214	159	0.465928	-0.331681
CCCTCC	170	101	0.00493693	-2.30654	395	279	0.00609773	-2.21483	315	257	0.899631	0.0459355
CCCTCG	62	50	0.849753	-0.0707073	156	100	0.0145861	-1.83606	54	42	0.918368	-0.0369834
CCCTCT	86	66	0.569451	-0.244543	290	212	0.0489386	-1.31035	300	231	0.600726	-0.221323
CCCTGA	36	60	0.00137055	2.8631	380	343	0.681892	0.166285	190	199	0.0106955	1.9708
CCCTGC	101	87	0.941676	0.0260987	543	395	0.00537162	-2.26989	301	255	0.579229	0.23715
CCCTGG	94	57	0.0497608	-1.30311	527	506	0.142595	0.845895	308	273	0.259985	0.585052
CCCTGT	44	29	0.347459	-0.459096	285	244	0.827536	-0.082213	285	180	0.0102541	-1.9891
CCCTTA	15	12	1	0	111	90	0.620971	-0.206929	128	102	0.9472	-0.0235582
CCCTTC	54	47	0.920625	0.0359172	333	245	0.0409918	-1.3873	287	217	0.501527	-0.299706
CCCTTG	34	44	0.0688529	1.16208	173	162	0.547213	0.261843	216	172	0.91871	-0.0368215
CCCTTT	44	26	0.151521	-0.819526	227	165	0.0762752	-1.11762	379	252	0.0180823	-1.74275
CCGAAA	19	11	0.362265	-0.440973	130	75	0.00401852	-2.39593	26	12	0.140976	-0.850854
CCGAAC	18	10	0.344435	-0.462893	90	60	0.102507	-0.989246	18	8	0.171739	-0.765131
CCGAAG	39	23	0.202189	-0.694242	147	114	0.352237	-0.453165	33	31	0.61537	0.210864
CCGAAT	13	9	0.675347	-0.170473	80	72	0.871186	0.059889	24	23	0.560922	0.251098
CCGACA	14	9	0.539532	-0.267983	117	108	0.689168	0.161675	33	14	0.0409297	-1.38796
CCGACC	28	24	1	0	109	95	1	0	21	19	0.752003	0.123781
CCGACG	23	15	0.515742	-0.287567	81	52	0.082641	-1.0828	8	3	0.365327	-0.437318
CCGACT	26	12	0.102371	-0.989823	82	89	0.167941	0.774842	30	30	0.437071	0.359448
CCGAGA	62	25	0.00164433	-2.78401	237	149	0.00153426	-2.8141	49	41	0.915669	0.0382613
CCGAGC	103	53	0.00287694	-2.54107	207	133	0.00550763	-2.25904	39	27	0.620836	-0.207023
CCGAGG	80	37	0.00208797	-2.68028	271	184	0.00843091	-2.07413	56	53	0.44112	0.355443
CCGAGT	37	20	0.111596	-0.952352	126	100	0.505048	-0.296668	47	41	0.748218	0.125972
CCGATA	6	6	0.780924	0.107391	31	25	0.790243	-0.102239	12	13	0.547461	0.261647
CCGATC	16	11	0.700614	-0.154521	43	33	0.645933	-0.189813	15	6	0.187499	-0.727002
CCGATG	8	12	0.262429	0.580988	84	79	0.694802	0.158139	25	26	0.399251	0.398754
CCGATT	5	9	0.188051	0.725724	44	42	0.746041	0.127238	26	15	0.347333	-0.459254
CCGCAA	21	16	0.869287	-0.0608371	144	98	0.0614743	-1.21131	19	20	0.424232	0.372397
CCGCAC	52	25	0.0216343	-1.66486	122	94	0.375556	-0.425325	28	26	0.681766	0.166365
CCGCAG	85	75	0.812152	0.0903625	225	143	0.00285342	-2.54463	51	37	0.668732	-0.174748
CCGCAT	14	4	0.0569697	-1.24436	101	94	0.667558	0.175511	27	26	0.5811	0.235749
CCGCCA	81	44	0.0192598	-1.71535	240	143	0.000266434	-3.57441	48	37	0.91323	-0.0394198
CCGCCC	254	87	1.15313e-14	-13.9381	228	110	1.42651e-07	-6.84573	80	64	1	0
CCGCCG	268	133	2.73326e-07	-6.56332	310	138	8.77915e-12	-11.0565	35	11	0.00454345	-2.34261
CCGCCT	103	63	0.0428065	-1.36849	265	143	2.22329e-06	-5.653	78	58	0.66695	-0.175906
CCGCGA	54	35	0.242207	-0.615813	63	51	0.708001	-0.149966	11	2	0.0476038	-1.32236
CCGCGC	155	98	0.023103	-1.63633	130	76	0.00513276	-2.28965	19	13	0.723905	-0.140318
CCGCGG	168	105	0.0149713	-1.82474	182	96	5.20538e-05	-4.28355	14	16	0.36275	0.440393
CCGCGT	51	20	0.00274304	-2.56177	49	51	0.422994	0.373666	23	7	0.0258639	-1.58731
CCGCTA	16	10	0.556175	-0.254789	79	61	0.498345	-0.302469	14	12	1	0
CCGCTC	67	37	0.0385598	-1.41387	178	96	0.000102177	-3.99064	30	25	1	0
CCGCTG	98	66	0.15855	-0.799833	249	169	0.0107577	-1.96828	63	35	0.0839742	-1.07585
CCGCTT	39	24	0.255218	-0.593089	106	74	0.155581	-0.808042	43	24	0.176164	-0.754083
CCGGAA	49	26	0.063049	-1.20032	138	121	1	0	36	29	1	0
CCGGAC	57	37	0.215633	-0.666284	113	104	0.73393	0.134345	28	26	0.681766	0.166365
CCGGAG	123	57	0.000124634	-3.90436	267	176	0.00362932	-2.44017	62	31	0.0286448	-1.54295
CCGGAT	19	9	0.184345	-0.734368	89	70	0.525522	-0.279409	19	13	0.723905	-0.140318
CCGGCA	48	26	0.0794312	-1.10001	194	144	0.141058	-0.850601	37	23	0.364499	-0.438303
CCGGCC	180	70	7.97146e-09	-8.09846	268	169	0.000779764	-3.10804	63	50	1	0
CCGGCG	133	72	0.00199548	-2.69995	235	114	1.22978e-07	-6.91017	16	14	0.855779	0.0676381
CCGGCT	81	47	0.0411424	-1.38571	172	157	0.740276	0.130606	45	39	0.743396	0.12878
CCGGGA	111	59	0.0034012	-2.46837	248	194	0.252603	-0.597562	54	55	0.247663	0.606139
CCGGGC	154	84	0.00110158	-2.95798	242	146	0.000357861	-3.44629	60	49	1	0
CCGGGG	132	72	0.00245817	-2.60939	219	154	0.0379218	-1.42111	53	48	0.617003	0.209713
CCGGGT	54	25	0.0126041	-1.89949	89	82	0.759466	0.119491	45	38	0.912174	0.0399222
CCGGTA	15	8	0.305002	-0.515697	31	21	0.405757	-0.391734	16	10	0.560673	-0.25129
CCGGTC	30	13	0.046106	-1.33624	67	51	0.462161	-0.335207	20	12	0.47936	-0.319338
CCGGTG	35	23	0.359539	-0.444254	124	111	0.896014	0.0476852	40	29	0.717167	-0.14438
CCGGTT	29	12	0.0405997	-1.39148	62	39	0.111068	-0.954412	28	10	0.0228415	-1.64128
CCGTAA	5	11	0.0801004	1.09637	38	19	0.0466532	-1.33112	26	23	0.7751	0.110642
CCGTAC	5	5	1	0	44	30	0.297389	-0.526675	12	8	0.823034	-0.0845824
CCGTAG	17	8	0.227951	-0.642158	41	14	0.00166559	-2.77843	25	24	0.567599	0.245959
CCGTAT	7	2	0.193175	-0.714049	57	26	0.0056744	-2.24608	26	20	1	0
CCGTCA	9	10	0.647416	0.188816	102	86	0.826645	-0.0826811	27	25	0.676338	0.169836
CCGTCC	50	29	0.114068	-0.942835	102	74	0.22739	-0.643229	45	31	0.56444	-0.248382
CCGTCG	41	19	0.0279001	-1.55439	59	31	0.0202146	-1.69434	18	8	0.171739	-0.765131
CCGTCT	30	22	0.677155	-0.169312	90	67	0.337518	-0.471703	63	41	0.324089	-0.489336
CCGTGA	23	16	0.630736	-0.200152	108	99	0.780599	0.107572	36	35	0.474395	0.32386
CCGTGC	49	17	0.00115199	-2.93855	129	115	0.898018	0.0467149	45	49	0.147741	0.8305
CCGTGG	42	33	0.817007	-0.0877741	181	166	0.667229	0.175725	88	64	0.568251	-0.24546
CCGTGT	15	17	0.479054	0.319615	92	97	0.215265	0.667026	73	40	0.0579484	-1.23696
CCGTTA	8	7	1	0	29	36	0.172385	0.7635	17	18	0.497175	0.30349
CCGTTC	15	14	0.85323	0.0689341	77	60	0.549103	-0.260346	26	16	0.43997	-0.356577
CCGTTG	22	11	0.165016	-0.782474	39	37	0.731719	0.135656	34	20	0.276577	-0.558183
CCGTTT	15	8	0.305002	-0.515697	57	53	0.774875	0.110768	69	33	0.0126827	-1.89679
CCTAAA	14	19	0.221145	0.655323	157	161	0.160279	0.795124	178	164	0.231453	0.635538
CCTAAC	8	16	0.062922	1.2012	73	75	0.364864	0.437869	77	87	0.0337561	1.47165
CCTAAG	13	16	0.354031	0.450959	130	89	0.0782364	-1.10659	114	117	0.0737624	1.13217
CCTAAT	9	8	1	0	91	89	0.456273	0.340775	133	118	0.484997	0.314261
CCTACA	12	12	0.688202	0.162284	256	263	0.0711809	1.14764	121	105	0.592955	0.226978
CCTACC	18	19	0.514032	0.28901	209	148	0.0496947	-1.30369	127	93	0.498172	-0.302621
CCTACG	3	6	0.317113	0.498786	109	79	0.214242	-0.669096	16	15	0.719937	0.142705
CCTACT	14	15	0.57865	0.237584	163	152	0.572882	0.241935	129	102	0.894896	-0.0482276
CCTAGA	17	12	0.711186	-0.148017	114	98	0.945144	-0.0245019	134	125	0.260558	0.584096
CCTAGC	14	26	0.017005	1.76942	95	50	0.00346521	-2.46027	79	72	0.462236	0.335137
CCTAGG	19	19	0.62853	0.201674	72	61	0.862529	-0.0642263	118	105	0.500659	0.300458
CCTAGT	11	25	0.00659065	2.18107	87	59	0.135875	-0.866861	138	87	0.0810126	-1.09145
CCTATA	3	11	0.0159002	1.7986	95	94	0.422807	0.373858	88	102	0.0130308	1.88503
CCTATC	11	7	0.640444	-0.193519	102	92	0.885611	0.052757	83	86	0.104726	0.979946
CCTATG	11	9	1	0	290	196	0.00549247	-2.26023	125	80	0.106707	-0.971806
CCTATT	8	11	0.359166	0.444705	98	111	0.0712018	1.14751	173	133	0.687733	-0.16258
CCTCAA	17	29	0.025443	1.59443	355	313	0.938186	0.027711	190	143	0.544683	-0.263856
CCTCAC	41	42	0.440803	0.355756	306	240	0.213499	-0.670603	193	167	0.52477	0.280031
CCTCAG	64	71	0.120464	0.919143	551	407	0.00954616	-2.02017	353	261	0.291412	-0.535492
CCTCAT	21	14	0.503771	-0.297767	320	284	0.87047	0.060246	193	174	0.293882	0.531827
CCTCCA	59	56	0.574834	0.240457	525	377	0.00330232	-2.48118	269	210	0.747721	-0.12626
CCTCCC	178	114	0.0217645	-1.66225	412	334	0.304264	-0.51675	478	363	0.405064	-0.392476
CCTCCG	100	57	0.0162752	-1.78847	205	136	0.0124685	-1.90418	65	55	0.854391	0.0683432
CCTCCT	131	87	0.088916	-1.05102	498	435	1	0	365	317	0.335787	0.473936
CCTCGA	19	21	0.430101	0.366429	131	90	0.0797196	-1.09843	40	27	0.539476	-0.268028
CCTCGC	94	42	0.000526893	-3.27828	126	97	0.348281	-0.458071	43	33	0.908281	-0.0417798
CCTCGG	84	67	0.744273	-0.128268	208	120	0.000249965	-3.60212	72	59	0.930214	0.031417
CCTCGT	25	14	0.260865	-0.583585	107	75	0.157901	-0.801615	57	34	0.171574	-0.765547
CCTCTA	18	15	1	0	178	163	0.704057	0.152392	133	107	1	0
CCTCTC	112	82	0.348812	-0.457408	330	229	0.00750745	-2.12451	280	250	0.25589	0.591946
CCTCTG	69	75	0.154766	0.810325	441	369	0.52634	-0.278733	331	288	0.352526	0.452809
CCTCTT	46	44	0.597492	0.223668	290	252	0.965662	-0.0151748	333	262	0.772967	-0.111839
CCTGAA	22	36	0.0169872	1.76988	439	408	0.389247	0.409775	197	225	0.000409631	3.38761
CCTGAC	32	42	0.0625668	1.20366	252	249	0.179213	0.74663	179	182	0.0298485	1.52508
CCTGAG	80	73	0.6851	0.164246	406	332	0.37584	-0.424997	287	237	0.792174	0.10118
CCTGAT	9	22	0.00616183	2.21029	237	274	0.00188105	2.7256	150	138	0.285991	0.543647
CCTGCA	48	60	0.052896	1.27658	577	446	0.0519149	-1.28471	230	214	0.138872	0.857386
CCTGCC	97	101	0.153742	0.813207	569	434	0.0313461	-1.50382	402	317	0.792851	-0.100808
CCTGCG	85	33	8.92576e-05	-4.04935	207	185	0.839693	0.0758795	67	40	0.144775	-0.839305
CCTGCT	56	68	0.0474135	1.3241	469	439	0.318298	0.497166	293	233	0.895344	-0.0480103
CCTGGA	68	67	0.388676	0.410412	697	746	0.000142415	3.84644	286	232	0.964756	0.0155825
CCTGGC	93	76	0.877325	-0.0568393	498	435	1	0	317	248	0.735041	-0.133689
CCTGGG	97	67	0.210214	-0.677339	470	449	0.186013	0.730456	391	309	0.819548	-0.0864257
CCTGGT	40	28	0.467144	-0.330549	323	331	0.0455492	1.34152	209	165	0.876026	-0.0574828
CCTGTA	11	13	0.421694	0.375003	165	190	0.0105827	1.9754	241	181	0.493072	-0.30709
CCTGTC	36	38	0.352804	0.452467	253	236	0.496645	0.303954	235	167	0.228501	-0.641112
CCTGTG	49	48	0.477591	0.320944	430	379	0.943808	0.0251161	333	268	1	0
CCTGTT	34	29	1	0	243	192	0.312849	-0.504665	334	206	0.00241962	-2.61625
CCTTAA	13	17	0.273065	0.563734	121	88	0.188564	-0.724542	182	152	0.78321	0.106122
CCTTAC	14	14	0.706963	0.150603	202	147	0.0961444	-1.01708	132	109	0.896927	0.047243
CCTTAG	25	14	0.260865	-0.583585	74	83	0.128631	0.890655	156	123	0.856919	-0.06706
CCTTAT	11	15	0.242843	0.614674	256	110	1.1163e-10	-9.95222	161	129	1	0
CCTTCA	28	39	0.0493371	1.30683	511	362	0.00201233	-2.6963	229	198	0.495589	0.304879
CCTTCC	77	64	0.932815	-0.0302045	421	305	0.0126277	-1.89867	385	297	0.589694	-0.229373
CCTTCG	34	15	0.0436055	-1.36046	151	121	0.503897	-0.297658	34	35	0.333734	0.4766
CCTTCT	58	59	0.353592	0.451497	369	294	0.242818	-0.61472	307	246	0.965886	-0.0150743
CCTTGA	11	28	0.00118914	2.92477	200	179	0.836968	0.0772913	203	133	0.0622684	-1.20573
CCTTGC	43	34	0.819497	-0.0864528	227	197	0.961187	-0.0171922	195	164	0.710297	0.14856
CCTTGG	40	50	0.0719619	1.1429	249	257	0.0676154	1.16995	238	212	0.297108	0.527085
CCTTGT	20	20	0.636142	0.196446	199	153	0.239963	-0.619855	262	192	0.32172	-0.492522
CCTTTA	12	12	0.688202	0.162284	235	141	0.000353013	-3.45221	261	167	0.0195701	-1.70841
CCTTTC	52	41	0.755859	-0.121559	240	182	0.156983	-0.804148	311	249	0.966096	-0.0149797
CCTTTG	38	28	0.622335	-0.205976	335	300	0.780755	0.107485	345	234	0.0405692	-1.3918
CCTTTT	44	47	0.293111	0.532968	210	209	0.202898	0.692721	606	368	1.52212e-05	-4.81755
CGAAAA	16	3	0.00976696	-2.01024	123	83	0.0695049	-1.15798	27	20	0.883582	-0.0537531
CGAAAC	9	3	0.245698	-0.609598	72	46	0.0973981	-1.01145	36	19	0.138031	-0.860025
CGAAAG	22	16	0.745395	-0.127614	130	65	0.000178117	-3.74929	31	33	0.3145	0.50238
CGAAAT	2	4	0.422802	0.373863	62	54	1	0	16	24	0.0566561	1.24675
CGAACA	5	6	0.763986	0.116915	83	65	0.511161	-0.291443	23	16	0.748076	-0.126054
CGAACC	22	14	0.504055	-0.297522	83	48	0.0226705	-1.64454	11	13	0.413206	0.383833
CGAACG	15	6	0.128581	-0.890824	29	14	0.0677278	-1.16923	6	3	0.739836	-0.130865
CGAACT	14	2	0.00972648	-2.01204	69	50	0.314083	-0.502955	36	16	0.0504321	-1.29729
CGAAGA	26	10	0.0302693	-1.519	193	124	0.00804542	-2.09445	30	32	0.307106	0.512712
CGAAGC	26	19	0.656392	-0.182837	104	77	0.296943	-0.527326	24	16	0.63446	-0.197596
CGAAGG	28	25	0.890802	0.0502189	106	75	0.179769	-0.745284	41	25	0.322017	-0.492121
CGAAGT	12	11	1	0	90	57	0.057399	-1.2411	31	18	0.314988	-0.501706
CGAATA	2	4	0.422802	0.373863	40	37	0.820237	0.0860609	15	16	0.472979	0.325158
CGAATC	15	4	0.0368685	-1.43334	58	57	0.575276	0.240124	21	16	1	0
CGAATG	8	5	0.782351	-0.106599	117	68	0.00781884	-2.10686	30	34	0.208321	0.681268
CGAATT	8	6	1	0	69	52	0.466216	-0.331413	33	18	0.205656	-0.686858
CGACAA	8	4	0.564484	-0.248348	84	75	0.936703	0.0283982	13	12	0.841225	0.0750878
CGACAC	6	9	0.307768	0.511777	74	92	0.024202	1.61615	19	16	1	0
CGACAG	20	7	0.0515784	-1.28753	131	106	0.558581	-0.252914	30	24	1	0
CGACAT	5	4	1	0	95	75	0.538867	-0.268518	24	16	0.63446	-0.197596
CGACCA	15	9	0.539827	-0.267745	97	85	1	0	16	23	0.0777021	1.10957
CGACCC	42	19	0.0209987	-1.67781	132	68	0.000369336	-3.43258	14	8	0.522888	-0.281592
CGACCG	22	12	0.232925	-0.632784	48	32	0.262751	-0.580456	6	1	0.140051	-0.853713
CGACCT	20	15	0.738427	-0.131692	119	98	0.683373	-0.165342	21	20	0.63905	0.194465
CGACGA	8	7	1	0	82	48	0.027817	-1.55569	3	7	0.122422	0.912142
CGACGC	28	21	0.774706	-0.110863	70	32	0.00198844	-2.70149	4	1	0.389253	-0.409768
CGACGG	27	11	0.0493309	-1.30688	77	49	0.0895867	-1.04776	7	6	1	0
CGACGT	6	5	1	0	55	36	0.20716	-0.683695	15	7	0.285361	-0.544605
CGACTA	7	6	1	0	44	45	0.524074	0.280608	7	5	1	0
CGACTC	27	18	0.458023	-0.339113	92	75	0.698318	-0.155947	23	24	0.382875	0.416943
CGACTG	22	11	0.165016	-0.782474	109	93	0.887955	-0.0516089	27	17	0.45201	-0.344852
CGACTT	21	11	0.217151	-0.663237	94	81	0.939723	-0.027	37	26	0.614595	-0.211411
CGAGAA	25	13	0.192309	-0.716001	207	155	0.154817	-0.810183	37	25	0.525147	-0.279719
CGAGAC	38	19	0.0629727	-1.20085	127	98	0.385076	-0.414453	41	32	0.906936	-0.0424232
CGAGAG	60	29	0.0139916	-1.85413	179	121	0.0279377	-1.55381	44	36	1	0
CGAGAT	18	8	0.167371	-0.77632	129	101	0.42793	-0.368627	31	23	0.786104	-0.10452
CGAGCA	33	20	0.27084	-0.567288	142	117	0.663003	-0.178484	30	20	0.570588	-0.243678
CGAGCC	78	47	0.0722838	-1.14096	174	109	0.00608129	-2.216	30	27	0.691376	0.160286
CGAGCG	90	35	4.7635e-05	-4.32207	99	62	0.0399638	-1.39833	13	8	0.662657	-0.178712
CGAGCT	31	28	0.89619	0.0475998	164	134	0.562098	-0.250188	34	21	0.346604	-0.460166
CGAGGA	41	27	0.331989	-0.478876	291	228	0.218064	-0.661416	45	33	0.733188	-0.134785
CGAGGC	82	37	0.00121132	-2.91674	198	126	0.00530027	-2.2757	50	48	0.416861	0.380009
CGAGGG	62	34	0.040833	-1.38899	131	99	0.290424	-0.536967	46	38	0.913113	0.0394757
CGAGGT	24	13	0.247872	-0.605773	114	87	0.358323	-0.445726	52	37	0.595036	-0.225457
CGAGTA	8	7	1	0	58	45	0.555319	-0.255457	28	21	0.88608	-0.0525273
CGAGTC	38	15	0.0124122	-1.90615	111	71	0.0445675	-1.35098	37	21	0.234581	-0.629707
CGAGTG	22	15	0.621343	-0.206669	145	101	0.0843325	-1.07401	36	33	0.629101	0.201279
CGAGTT	22	9	0.0712109	-1.14745	94	76	0.644903	-0.190505	24	37	0.0139953	1.85402
CGATAA	6	4	0.76225	-0.117903	19	21	0.527091	0.278114	13	11	1	0
CGATAC	3	8	0.126627	0.897474	29	30	0.6021	0.220331	9	11	0.37591	0.424916
CGATAG	2	2	1	0	18	10	0.262322	-0.581165	17	11	0.704606	-0.152054
CGATAT	6	2	0.302519	-0.519247	30	37	0.178425	0.748544	22	12	0.304207	-0.516831
CGATCA	10	3	0.161767	-0.791109	47	38	0.745302	-0.127668	9	11	0.37591	0.424916
CGATCC	14	9	0.539532	-0.267983	49	40	0.751471	-0.124088	18	12	0.714536	-0.145976
CGATCG	11	9	1	0	21	13	0.391134	-0.407675	6	3	0.739836	-0.130865
CGATCT	9	11	0.502648	0.298736	57	39	0.260848	-0.583613	41	19	0.0508206	-1.29396
CGATGA	3	8	0.126627	0.897474	105	107	0.271484	0.566256	30	16	0.18587	-0.73079
CGATGC	14	12	1	0	68	63	0.792931	0.100765	22	19	0.875801	0.0575944
CGATGG	7	10	0.334487	0.47562	96	86	0.882144	0.0544605	24	25	0.390996	0.407828
CGATGT	6	2	0.302519	-0.519247	71	73	0.358488	0.445526	31	25	1	0
CGATTA	7	5	1	0	28	28	0.688323	0.162208	15	16	0.472979	0.325158
CGATTC	6	6	0.780924	0.107391	52	57	0.250284	0.601567	41	18	0.0353521	-1.45158
CGATTG	8	7	1	0	40	28	0.396216	-0.402068	22	14	0.50835	-0.293837
CGATTT	4	9	0.102038	0.991239	45	40	1	0	55	23	0.00839375	-2.07604
CGCAAA	9	10	0.647416	0.188816	110	53	0.000283775	-3.54703	22	24	0.373743	0.427427
CGCAAC	23	11	0.123998	-0.906587	77	57	0.342611	-0.465199	16	16	0.595725	0.224954
CGCAAG	15	18	0.382995	0.416807	167	98	0.00164623	-2.78351	23	15	0.625199	-0.203982
CGCAAT	5	2	0.464326	-0.333177	31	31	0.612886	0.21262	10	18	0.0553006	1.25727
CGCACA	29	12	0.0405997	-1.39148	88	91	0.294247	0.531287	39	36	0.563704	0.248949
CGCACC	44	22	0.0475958	-1.32243	122	81	0.0574027	-1.24107	28	32	0.194709	0.710615
CGCACG	30	17	0.191225	-0.718455	55	40	0.411199	-0.385948	6	14	0.0252027	1.59855
CGCACT	23	6	0.00798815	-2.09755	67	46	0.220774	-0.656051	26	15	0.347333	-0.459254
CGCAGA	37	24	0.368572	-0.433477	138	98	0.117603	-0.92958	41	33	1	0
CGCAGC	127	77	0.0203649	-1.69112	259	159	0.000405515	-3.39199	39	35	0.642438	0.192169
CGCAGG	78	48	0.0891757	-1.04975	155	101	0.0205219	-1.68778	44	34	0.909544	-0.0411765
CGCAGT	27	19	0.557786	-0.253532	87	49	0.0127211	-1.89547	36	24	0.517445	-0.286136
CGCATA	1	0	1	0	20	14	0.607327	-0.216577	13	11	1	0
CGCATC	16	13	1	0	127	94	0.225411	-0.647024	27	16	0.360161	-0.443503
CGCATG	14	9	0.539532	-0.267983	83	61	0.316884	-0.499099	25	24	0.567599	0.245959
CGCATT	10	7	0.80993	-0.0915525	51	57	0.211004	0.67571	23	24	0.382875	0.416943
CGCCAA	16	13	1	0	149	89	0.00420064	-2.37668	22	12	0.304207	-0.516831
CGCCAC	61	40	0.230976	-0.636433	165	110	0.0293984	-1.53168	59	38	0.307627	-0.511975
CGCCAG	60	40	0.269758	-0.569026	228	154	0.0137408	-1.86199	47	34	0.65631	-0.182891
CGCCAT	29	9	0.00828262	-2.08183	121	93	0.373226	-0.428028	38	36	0.486078	0.313294
CGCCCA	52	30	0.0971415	-1.0126	180	94	3.60631e-05	-4.44294	64	57	0.584825	0.232974
CGCCCC	186	82	4.07693e-07	-6.38967	198	101	7.27699e-06	-5.13805	69	57	0.92869	0.0321292
CGCCCG	168	79	1.23562e-05	-4.90812	139	71	0.000177071	-3.75185	37	19	0.138552	-0.858386
CGCCCT	86	38	0.000783067	-3.1062	146	106	0.14681	-0.833246	54	37	0.462367	-0.335013
CGCCGA	62	27	0.00382918	-2.41689	109	64	0.0117432	-1.93021	5	7	0.392429	0.406238
CGCCGC	300	158	9.51887e-07	-6.02141	322	147	1.84328e-11	-10.7344	31	18	0.314988	-0.501706
CGCCGG	121	69	0.00864458	-2.06326	186	107	0.000529861	-3.27584	19	12	0.589616	-0.229431
CGCCGT	42	19	0.0209987	-1.67781	88	61	0.163797	-0.785693	6	10	0.208069	0.681792
CGCCTA	8	13	0.188133	0.725535	54	46	0.920439	-0.0360049	14	14	0.574865	0.240434
CGCCTC	120	67	0.00646922	-2.18915	206	137	0.0127533	-1.89438	70	45	0.260557	-0.584097
CGCCTG	67	41	0.101645	-0.992913	256	139	4.13322e-06	-5.38371	81	66	1	0
CGCCTT	58	26	0.00606771	-2.21698	123	100	0.592088	-0.227614	45	22	0.0645219	-1.19029
CGCGAA	20	6	0.0283901	-1.54683	21	17	0.871715	-0.0596253	6	4	1	0
CGCGAC	33	18	0.159532	-0.797152	56	29	0.0221693	-1.65425	4	3	1	0
CGCGAG	74	39	0.0178963	-1.74724	73	54	0.374352	-0.42672	10	8	1	0
CGCGAT	13	5	0.157106	-0.803808	18	20	0.51695	0.286552	12	7	0.645796	-0.189905
CGCGCA	55	29	0.0378207	-1.42227	70	36	0.00856343	-2.06735	10	5	0.444307	-0.352317
CGCGCC	134	86	0.0494299	-1.30601	132	61	2.5271e-05	-4.59738	30	18	0.384152	-0.415497
CGCGCG	163	70	9.46471e-07	-6.02389	57	39	0.260848	-0.583613	15	10	0.691825	-0.160004
CGCGCT	79	58	0.440635	-0.355921	88	52	0.0273209	-1.56351	5	8	0.269226	0.569882
CGCGGA	71	39	0.0347767	-1.45871	78	53	0.16182	-0.790967	5	6	0.555466	0.255342
CGCGGC	173	81	6.8401e-06	-5.16494	204	97	4.22189e-07	-6.37449	8	11	0.25811	0.588196
CGCGGG	139	89	0.0393812	-1.40471	98	86	1	0	19	15	1	0
CGCGGT	52	29	0.0746389	-1.12703	47	30	0.208761	-0.68035	12	15	0.333229	0.477257
CGCGTA	8	5	0.782351	-0.106599	7	12	0.171743	0.76512	5	2	0.471725	-0.326311
CGCGTC	45	21	0.0256111	-1.59157	51	42	0.835537	-0.0780343	13	1	0.00509491	-2.29286
CGCGTG	36	23	0.299515	-0.523581	56	44	0.617412	-0.209425	27	12	0.106194	-0.973898
CGCGTT	25	7	0.00705934	-2.15124	14	16	0.47139	0.32662	12	7	0.645796	-0.189905
CGCTAA	3	7	0.202642	0.693271	23	29	0.211689	0.674302	9	14	0.142608	0.845856
CGCTAC	8	12	0.262429	0.580988	104	91	1	0	15	6	0.187499	-0.727002
CGCTAG	19	5	0.0138853	-1.85744	22	13	0.310369	-0.508122	12	12	0.682894	0.165646
CGCTAT	5	5	1	0	54	56	0.390691	0.408167	11	19	0.0439705	1.35684
CGCTCA	25	14	0.260865	-0.583585	120	84	0.122743	-0.911004	30	23	0.890909	-0.0501665
CGCTCC	79	68	0.934171	0.0295734	149	112	0.238578	-0.622369	44	30	0.559085	-0.252522
CGCTCG	59	32	0.0453229	-1.34368	62	37	0.0697515	-1.15645	12	8	0.823034	-0.0845824
CGCTCT	40	32	0.905955	-0.0428932	119	75	0.025735	-1.58948	39	28	0.712844	-0.147006
CGCTGA	39	23	0.202189	-0.694242	104	90	0.942801	-0.02558	45	22	0.0645219	-1.19029
CGCTGC	114	79	0.193217	-0.713955	295	187	0.000513256	-3.28967	62	45	0.627537	-0.202361
CGCTGG	82	47	0.0338126	-1.47092	193	190	0.259933	0.585139	50	40	1	0
CGCTGT	40	22	0.125524	-0.901273	140	107	0.307766	-0.51178	44	37	0.911129	0.04042
CGCTTA	2	7	0.0898873	1.0463	36	25	0.441639	-0.354932	21	17	1	0
CGCTTC	44	29	0.347459	-0.459096	140	99	0.105476	-0.976847	36	31	0.806819	0.0932239
CGCTTG	37	21	0.148991	-0.826841	68	48	0.265242	-0.576358	35	23	0.5097	-0.292685
CGCTTT	20	15	0.738427	-0.131692	61	65	0.284528	0.545875	42	32	0.907022	-0.0423824
CGGAAA	28	9	0.00820953	-2.08568	156	116	0.201792	-0.695096	32	16	0.145885	-0.83599
CGGAAC	21	14	0.503771	-0.297767	98	81	0.708842	-0.149451	18	22	0.205201	0.68782
CGGAAG	59	31	0.0339423	-1.46926	185	143	0.268881	-0.570441	44	28	0.345108	-0.462045
CGGAAT	7	9	0.457853	0.339274	73	60	0.72909	-0.137219	32	16	0.145885	-0.83599
CGGACA	25	20	0.882154	-0.0544557	136	97	0.131036	-0.88261	21	19	0.752003	0.123781
CGGACC	45	34	0.652591	-0.185359	119	90	0.299413	-0.523729	24	17	0.754543	-0.122316
CGGACG	40	16	0.0103813	-1.98375	64	50	0.574185	-0.240948	10	7	0.812766	-0.0900344
CGGACT	33	19	0.210498	-0.676753	103	70	0.109564	-0.960333	30	28	0.599182	0.222441
CGGAGA	78	38	0.00500053	-2.30098	225	184	0.519458	-0.28445	55	34	0.241628	-0.616852
CGGAGC	145	69	6.26057e-05	-4.20339	252	155	0.000496818	-3.3038	42	34	1	0
CGGAGG	114	58	0.0016213	-2.79014	221	179	0.452501	-0.34438	66	31	0.0138561	-1.85836
CGGAGT	47	13	0.000134478	-3.87135	102	77	0.331385	-0.479667	35	26	0.797656	-0.0981844
CGGATA	3	3	1	0	40	40	0.576458	0.239232	13	5	0.163833	-0.785598
CGGATC	21	11	0.217151	-0.663237	68	69	0.39309	0.405507	27	19	0.767146	-0.115122
CGGATG	14	11	1	0	126	104	0.691888	-0.159964	31	28	0.695602	0.157639
CGGATT	19	9	0.184345	-0.734368	59	56	0.708785	0.149485	21	18	0.873135	0.0589187
CGGCAA	16	7	0.149014	-0.826773	144	95	0.0324586	-1.48867	26	16	0.43997	-0.356577
CGGCAC	35	16	0.04814	-1.31749	144	89	0.0103186	-1.98638	27	19	0.767146	-0.115122
CGGCAG	116	44	2.26861e-06	-5.64424	314	205	0.00111173	-2.954	50	31	0.265228	-0.576381
CGGCAT	10	14	0.227248	0.643499	98	88	0.88329	0.0538967	21	18	0.873135	0.0589187
CGGCCA	53	30	0.0787295	-1.10386	246	154	0.00110095	-2.95823	49	30	0.25846	-0.587607
CGGCCC	150	72	6.37975e-05	-4.1952	280	153	2.14141e-06	-5.6693	67	49	0.641114	-0.193064
CGGCCG	166	65	4.42519e-08	-7.35407	206	111	2.91378e-05	-4.53554	16	18	0.389251	0.40977
CGGCCT	77	30	0.000199717	-3.69959	165	141	0.863597	-0.0636889	61	53	0.707063	0.150542
CGGCGA	67	26	0.000529478	-3.27615	113	63	0.00400291	-2.39762	6	6	0.776289	0.109976
CGGCGC	162	78	3.05251e-05	-4.51534	233	123	4.43572e-06	-5.35304	10	12	0.394889	0.403525
CGGCGG	312	135	1.48126e-11	-10.8294	418	190	1.30793e-14	-13.8834	23	16	0.748076	-0.126054
CGGCGT	33	20	0.27084	-0.567288	75	56	0.382357	-0.417531	13	10	1	0
CGGCTA	13	12	0.843616	0.0738552	63	53	0.852847	-0.069129	22	20	0.757117	0.120837
CGGCTC	79	37	0.00272702	-2.56431	184	124	0.0258124	-1.58817	46	41	0.667068	0.17583
CGGCTG	116	64	0.00556773	-2.25432	275	213	0.188277	-0.725204	54	57	0.181099	0.742084
CGGCTT	44	31	0.487336	-0.312172	131	82	0.0193341	-1.71368	37	32	0.809202	0.0919432
CGGGAA	46	28	0.19912	-0.700884	171	147	0.910525	-0.0407082	50	34	0.510485	-0.292017
CGGGAC	78	47	0.0722838	-1.14096	148	124	0.761303	-0.118442	31	31	0.443934	0.352682
CGGGAG	127	68	0.00196849	-2.70587	272	201	0.0722182	-1.14135	77	46	0.122821	-0.910729
CGGGAT	20	17	1	0	93	84	0.880296	0.0553714	31	22	0.68064	-0.167083
CGGGCA	49	33	0.320688	-0.493917	167	115	0.0489135	-1.31057	52	42	1	0
CGGGCC	122	53	3.63241e-05	-4.43981	220	150	0.0189637	-1.72208	45	35	0.910807	-0.0405737
CGGGCG	156	78	0.000130521	-3.88432	114	77	0.0819033	-1.0867	31	22	0.68064	-0.167083
CGGGCT	68	38	0.0406721	-1.3907	121	117	0.474898	0.3234	43	19	0.0294933	-1.53028
CGGGGA	90	52	0.0284546	-1.54585	210	134	0.00414808	-2.38215	63	41	0.324089	-0.489336
CGGGGC	148	72	8.13097e-05	-4.08986	210	148	0.0441538	-1.35503	53	46	0.761958	0.118069
CGGGGG	109	58	0.00397116	-2.40108	167	107	0.0129026	-1.88932	70	58	0.929212	0.0318853
CGGGGT	48	29	0.169976	-0.769611	79	69	1	0	52	41	1	0
CGGGTA	15	8	0.305002	-0.515697	47	33	0.370539	-0.431167	21	15	0.741131	-0.130105
CGGGTC	54	22	0.00371054	-2.43056	76	58	0.437578	-0.358945	25	27	0.329497	0.482149
CGGGTG	47	26	0.099402	-1.0026	111	81	0.21952	-0.658526	57	32	0.109833	-0.959267
CGGGTT	29	16	0.180358	-0.743864	43	34	0.732169	-0.135389	40	29	0.717167	-0.14438
CGGTAA	8	3	0.244164	-0.612318	25	6	0.00199034	-2.70107	24	24	0.471014	0.326966
CGGTAC	8	2	0.121458	-0.915573	47	38	0.745302	-0.127668	15	3	0.0174238	-1.75886
CGGTAG	18	10	0.344435	-0.462893	23	13	0.243142	-0.614139	22	8	0.0646223	-1.18962
CGGTAT	3	3	1	0	30	29	0.794389	0.099967	17	12	0.852361	-0.0693763
CGGTCA	14	9	0.539532	-0.267983	87	69	0.574689	-0.240567	26	14	0.266083	-0.574983
CGGTCC	41	26	0.270997	-0.567035	75	61	0.731168	-0.135983	22	17	1	0
CGGTCG	19	11	0.362265	-0.440973	17	22	0.261816	0.582003	9	4	0.407837	-0.389513
CGGTCT	27	8	0.00626716	-2.20293	42	49	0.173625	0.760387	21	13	0.494174	-0.30612
CGGTGA	34	15	0.0436055	-1.36046	86	72	0.811236	-0.0908529	29	42	0.0165366	1.78155
CGGTGC	52	32	0.156582	-0.805258	133	103	0.361642	-0.441721	32	20	0.404799	-0.39276
CGGTGG	67	24	0.000194321	-3.71148	184	119	0.0111682	-1.95202	60	42	0.55034	-0.259369
CGGTGT	19	14	0.730001	-0.136677	88	82	0.70115	0.154189	45	24	0.115232	-0.938428
CGGTTA	7	9	0.457853	0.339274	24	21	1	0	26	15	0.347333	-0.459254
CGGTTC	28	15	0.169431	-0.771006	66	57	1	0	26	15	0.347333	-0.459254
CGGTTG	26	10	0.0302693	-1.519	45	31	0.357833	-0.446319	38	20	0.145825	-0.836167
CGGTTT	28	15	0.169431	-0.771006	52	51	0.621686	0.206429	41	36	0.731894	0.135552
CGTAAA	2	4	0.422802	0.373863	42	24	0.108492	-0.964604	48	21	0.020806	-1.68181
CGTAAC	8	3	0.244164	-0.612318	15	13	1	0	25	23	0.6655	0.176852
CGTAAG	6	3	0.521208	-0.282989	32	17	0.114622	-0.940734	27	19	0.767146	-0.115122
CGTAAT	2	5	0.258819	0.587004	18	21	0.423396	0.373253	18	14	1	0
CGTACA	6	6	0.780924	0.107391	46	28	0.13163	-0.880644	21	19	0.752003	0.123781
CGTACC	6	7	0.589589	0.229451	43	37	1	0	12	12	0.682894	0.165646
CGTACG	2	1	1	0	19	12	0.472219	-0.325856	4	3	1	0
CGTACT	5	4	1	0	32	22	0.415225	-0.381716	22	15	0.74138	-0.129959
CGTAGA	8	7	1	0	37	36	0.725178	0.139555	19	26	0.098075	1.00844
CGTAGC	13	7	0.376049	-0.424755	25	16	0.351334	-0.45428	25	11	0.0957223	-1.01899
CGTAGG	14	8	0.401043	-0.396809	25	11	0.0651998	-1.18575	31	21	0.578931	-0.237373
CGTAGT	6	5	1	0	20	13	0.486278	-0.313115	25	15	0.427656	-0.368905
CGTATA	0	3	0.0964045	1.0159	24	12	0.13254	-0.877652	22	20	0.757117	0.120837
CGTATC	3	2	1	0	45	25	0.0724744	-1.13982	19	21	0.342543	0.465285
CGTATG	6	5	1	0	32	33	0.535727	0.271056	30	18	0.384152	-0.415497
CGTATT	9	3	0.245698	-0.609598	31	26	0.89522	-0.0480705	41	31	0.813647	-0.089564
CGTCAA	4	8	0.160843	0.793598	78	85	0.181856	0.740273	19	17	0.867169	0.0618962
CGTCAC	14	9	0.539532	-0.267983	89	81	0.817896	0.0873021	19	21	0.342543	0.465285
CGTCAG	16	17	0.601095	0.221057	121	66	0.00200511	-2.69786	34	23	0.594617	-0.225763
CGTCAT	5	5	1	0	76	93	0.0308695	1.51047	33	27	1	0
CGTCCA	14	16	0.465677	0.331915	113	95	0.781531	-0.107054	32	32	0.450885	0.345935
CGTCCC	53	39	0.531436	-0.274549	100	61	0.0268936	-1.57035	40	33	1	0
CGTCCG	28	15	0.169431	-0.771006	48	45	0.756093	0.121425	14	5	0.164528	-0.783759
CGTCCT	31	17	0.191793	-0.717168	100	116	0.0407073	1.39033	51	33	0.38008	-0.420125
CGTCGA	13	7	0.376049	-0.424755	26	20	0.767997	-0.11464	4	5	0.524789	0.280015
CGTCGC	35	23	0.359539	-0.444254	60	31	0.0157757	-1.80201	12	5	0.232071	-0.634378
CGTCGG	46	10	1.95053e-05	-4.70985	70	38	0.0202124	-1.69438	12	7	0.645796	-0.189905
CGTCGT	11	9	1	0	37	29	0.712044	-0.147493	11	6	0.476039	-0.322358
CGTCTA	6	2	0.302519	-0.519247	49	37	0.518422	-0.285317	30	13	0.0655052	-1.18372
CGTCTC	42	20	0.0405528	-1.39198	90	67	0.337518	-0.471703	47	48	0.257653	0.588965
CGTCTG	39	24	0.255218	-0.593089	104	84	0.609301	-0.215168	55	35	0.290316	-0.537129
CGTCTT	20	15	0.738427	-0.131692	76	71	0.741041	0.130157	61	38	0.225926	-0.646035
CGTGAA	12	17	0.19358	0.713139	113	97	0.94488	-0.0246232	43	42	0.384762	0.414808
CGTGAC	22	9	0.0712109	-1.14745	81	58	0.269179	-0.569958	31	26	0.894738	0.0483043
CGTGAG	23	15	0.515742	-0.287567	75	76	0.370934	0.430703	62	43	0.492417	-0.307667
CGTGAT	9	13	0.284678	0.545647	76	75	0.464189	0.333305	45	25	0.149409	-0.825624
CGTGCA	14	13	0.848574	0.0713104	105	103	0.444676	0.351956	50	50	0.314597	0.502246
CGTGCC	39	23	0.202189	-0.694242	118	96	0.631685	-0.1995	47	37	1	0
CGTGCG	37	26	0.527865	-0.277477	79	46	0.0310778	-1.50755	11	13	0.413206	0.383833
CGTGCT	23	11	0.123998	-0.906587	105	110	0.194349	0.711417	51	35	0.515648	-0.287647
CGTGGA	33	18	0.159532	-0.797152	186	195	0.0808387	1.09238	59	61	0.198427	0.702399
CGTGGC	33	29	0.899196	0.0461457	144	147	0.196314	0.707049	48	46	0.408503	0.388805
CGTGGG	43	26	0.185258	-0.732222	99	135	0.000804156	3.09466	81	43	0.0297816	-1.52605
CGTGGT	12	14	0.43702	0.359499	115	122	0.151925	0.818371	69	58	0.858459	0.0662807
CGTGTA	3	3	1	0	40	59	0.0115088	1.93897	43	29	0.479155	-0.319524
CGTGTC	20	7	0.0515784	-1.28753	98	84	0.940809	-0.0264987	49	29	0.210484	-0.676781
CGTGTG	26	25	0.675172	0.170586	111	116	0.183939	0.735326	82	67	0.934556	0.0293947
CGTGTT	11	5	0.31797	-0.497613	57	69	0.0741462	1.12991	72	43	0.133264	-0.875288
CGTTAA	6	2	0.302519	-0.519247	19	14	0.728006	-0.137865	39	29	0.807695	-0.0927526
CGTTAC	4	5	0.740748	0.13033	46	40	1	0	21	13	0.494174	-0.30612
CGTTAG	10	5	0.439635	-0.356908	19	18	0.869797	0.0605821	21	25	0.235099	0.62875
CGTTAT	5	3	0.734004	-0.134301	38	28	0.538292	-0.268982	34	25	0.793973	-0.100194
CGTTCA	6	11	0.145786	0.836284	64	73	0.123943	0.906778	40	16	0.0155303	-1.80882
CGTTCC	23	15	0.515742	-0.287567	65	68	0.33912	0.469646	38	29	0.902377	-0.044612
CGTTCG	19	5	0.0138853	-1.85744	19	22	0.434489	0.362021	9	2	0.126357	-0.898401
CGTTCT	18	12	0.585282	-0.232635	70	51	0.362292	-0.440941	56	35	0.247653	-0.606157
CGTTGA	10	9	1	0	30	35	0.264533	0.57752	23	15	0.625199	-0.203982
CGTTGC	22	14	0.504055	-0.297522	49	46	0.758354	0.120128	29	33	0.201414	0.695911
CGTTGG	24	11	0.0922119	-1.03521	52	43	0.837322	-0.0771076	44	34	0.909544	-0.0411765
CGTTGT	11	5	0.31797	-0.497613	50	36	0.389036	-0.41001	55	31	0.128521	-0.891025
CGTTTA	8	3	0.244164	-0.612318	33	28	1	0	44	27	0.284113	-0.546509
CGTTTC	22	7	0.0238994	-1.62161	67	50	0.405844	-0.391641	57	37	0.350559	-0.455239
CGTTTG	16	15	0.857607	0.0667117	62	55	1	0	64	36	0.0875739	-1.05763
CGTTTT	24	14	0.329011	-0.482789	68	59	1	0	103	65	0.140116	-0.853511
CTAAAA	21	23	0.450152	0.346641	183	140	0.241691	-0.61674	315	269	0.505451	0.296321
CTAAAC	5	10	0.123968	0.906689	112	96	0.88972	-0.0507465	132	109	0.896927	0.047243
CTAAAG	16	17	0.601095	0.221057	159	160	0.217283	0.662974	197	168	0.598915	0.222635
CTAAAT	11	19	0.0663455	1.17819	101	103	0.292658	0.533639	233	219	0.107695	0.967805
CTAACA	5	13	0.0317827	1.49781	103	79	0.4139	-0.383105	129	114	0.478617	0.320012
CTAACC	11	11	0.831244	0.0802714	75	62	0.797402	-0.0983227	66	74	0.0610586	1.21425
CTAACG	5	5	1	0	26	17	0.363907	-0.43901	18	18	0.615651	0.210666
CTAACT	8	15	0.0919743	1.03633	79	76	0.573685	0.241326	111	114	0.0704911	1.15187
CTAAGA	11	13	0.421694	0.375003	136	118	0.949965	-0.0222925	157	160	0.0417903	1.37892
CTAAGC	12	20	0.0749423	1.12527	98	65	0.0845312	-1.07298	101	88	0.609069	0.215333
CTAAGG	15	19	0.301816	0.520258	120	89	0.239502	-0.620691	123	111	0.393437	0.405125
CTAAGT	4	7	0.365052	0.437645	78	47	0.048231	-1.31667	129	113	0.518824	0.28498
CTAATA	4	6	0.528288	0.277129	66	67	0.434239	0.362271	146	146	0.0680989	1.16686
CTAATC	8	10	0.481348	0.317541	65	64	0.537121	0.269928	93	76	0.938471	0.027579
CTAATG	8	8	0.804932	0.0942406	108	115	0.158548	0.79984	160	156	0.100648	0.997193
CTAATT	8	13	0.188133	0.725535	80	74	0.747133	0.126602	262	234	0.259096	0.586539
CTACAA	5	14	0.0195943	1.70787	275	298	0.0106305	1.97345	118	141	0.0017327	2.76128
CTACAC	11	12	0.676541	0.169706	155	164	0.092395	1.03435	86	80	0.390554	0.408318
CTACAG	21	14	0.503771	-0.297767	339	265	0.178274	-0.748912	189	149	0.869665	-0.0606478
CTACAT	8	9	0.630371	0.200404	163	197	0.00255468	2.59266	130	118	0.371352	0.430214
CTACCA	8	19	0.0117797	1.92886	285	187	0.0022934	-2.63952	104	104	0.125176	0.902479
CTACCC	18	22	0.26885	0.570491	197	148	0.161103	-0.792897	119	74	0.0823503	-1.08433
CTACCG	11	7	0.640444	-0.193519	106	63	0.0166004	-1.77988	13	7	0.50147	-0.299755
CTACCT	14	13	0.848574	0.0713104	209	243	0.00293341	2.53263	160	140	0.486366	0.313037
CTACGA	4	0	0.130162	-0.885517	114	90	0.483368	-0.315722	13	15	0.3494	0.456677
CTACGC	11	7	0.640444	-0.193519	57	60	0.354237	0.450706	14	14	0.574865	0.240434
CTACGG	7	8	0.611237	0.21379	92	67	0.266325	-0.574588	11	13	0.413206	0.383833
CTACGT	4	5	0.740748	0.13033	56	81	0.00453817	2.34312	26	22	0.885435	0.0528433
CTACTA	7	5	1	0	95	101	0.174532	0.758126	120	89	0.578098	-0.237999
CTACTC	15	18	0.382995	0.416807	135	143	0.118045	0.927954	112	98	0.57895	0.237359
CTACTG	15	19	0.301816	0.520258	213	218	0.111017	0.954611	164	129	0.860154	-0.0654237
CTACTT	18	15	1	0	134	175	0.000489247	3.31047	175	158	0.321135	0.493313
CTAGAA	18	16	1	0	133	125	0.574895	0.240412	207	174	0.71834	0.14367
CTAGAC	11	8	0.820675	-0.0858289	70	74	0.277747	0.556351	98	64	0.20615	-0.685816
CTAGAG	21	26	0.241263	0.617509	134	117	1	0	163	113	0.226161	-0.645583
CTAGAT	4	11	0.0386871	1.41243	68	42	0.085093	-1.07011	103	101	0.180737	0.742953
CTAGCA	13	15	0.451674	0.345175	116	66	0.00582793	-2.23449	99	84	0.766292	0.115606
CTAGCC	16	16	0.723642	0.140476	104	54	0.00179045	-2.74704	81	63	0.867066	-0.0619477
CTAGCG	10	9	1	0	23	15	0.418702	-0.378095	5	7	0.392429	0.406238
CTAGCT	19	21	0.430101	0.366429	54	57	0.342169	0.465759	126	108	0.645897	0.189837
CTAGGA	20	22	0.44024	0.35631	76	58	0.437578	-0.358945	140	130	0.270468	0.567884
CTAGGC	28	14	0.121569	-0.915176	63	43	0.242617	-0.615079	87	70	1	0
CTAGGG	22	26	0.250909	0.600483	44	50	0.215795	0.665958	113	83	0.565553	-0.247527
CTAGGT	4	8	0.160843	0.793598	31	21	0.405757	-0.391734	101	92	0.425916	0.370676
CTAGTA	6	6	0.780924	0.107391	66	31	0.00416156	-2.38074	80	90	0.0308232	1.51112
CTAGTC	12	12	0.688202	0.162284	63	45	0.334983	-0.474977	89	56	0.155806	-0.807415
CTAGTG	13	16	0.354031	0.450959	121	89	0.2396	-0.620513	143	98	0.218917	-0.65972
CTAGTT	12	13	0.553692	0.256732	60	49	0.773608	-0.111479	163	127	0.813277	-0.0897617
CTATAA	5	9	0.188051	0.725724	126	119	0.564802	0.248104	167	176	0.0144184	1.84108
CTATAC	5	8	0.278822	0.554672	76	94	0.0257341	1.58949	69	79	0.0383913	1.41577
CTATAG	1	9	0.00742766	2.12915	59	79	0.0133239	1.87537	102	88	0.661869	0.179228
CTATAT	4	8	0.160843	0.793598	70	92	0.0115271	1.93828	173	159	0.246378	0.608398
CTATCA	8	11	0.359166	0.444705	146	146	0.265262	0.576326	101	102	0.120215	0.92004
CTATCC	8	12	0.262429	0.580988	111	101	0.783456	0.105985	81	70	0.683002	0.165578
CTATCG	6	2	0.302519	-0.519247	42	48	0.207028	0.68397	17	13	1	0
CTATCT	5	11	0.0801004	1.09637	81	109	0.00353955	2.45105	153	125	0.951908	0.0214049
CTATGA	8	11	0.359166	0.444705	340	293	0.873396	-0.0587887	145	117	1	0
CTATGC	4	7	0.365052	0.437645	136	145	0.106317	0.973397	99	78	0.939761	-0.0269824
CTATGG	11	7	0.640444	-0.193519	189	201	0.060245	1.22008	120	109	0.387727	0.411474
CTATGT	9	9	0.814749	0.0889762	111	140	0.00433318	2.36319	165	146	0.424867	0.371747
CTATTA	8	6	1	0	73	92	0.0233561	1.6316	165	138	0.772756	0.111958
CTATTC	5	9	0.188051	0.725724	106	117	0.0931433	1.03085	129	114	0.478617	0.320012
CTATTG	11	12	0.676541	0.169706	97	130	0.00170719	2.76772	152	118	0.806613	-0.0933347
CTATTT	16	14	1	0	107	137	0.00312887	2.50461	402	340	0.530164	0.275589
CTCAAA	15	21	0.136453	0.865017	297	225	0.104625	-0.980363	266	255	0.0523805	1.28083
CTCAAC	13	19	0.155385	0.808592	232	241	0.0652048	1.18572	101	102	0.120215	0.92004
CTCAAG	22	31	0.0731198	1.13596	350	332	0.300109	0.522721	205	135	0.0717266	-1.14432
CTCAAT	9	14	0.208391	0.68112	133	144	0.0807091	1.09308	141	118	0.802644	0.0954768
CTCACA	26	43	0.00746586	2.12692	300	206	0.00746252	-2.12711	175	181	0.0190156	1.72089
CTCACC	42	39	0.738257	0.131792	321	257	0.29735	-0.526731	178	161	0.299518	0.523577
CTCACG	25	14	0.260865	-0.583585	102	90	1	0	38	50	0.0241288	1.61746
CTCACT	31	35	0.26689	0.573668	207	201	0.297722	0.526189	259	191	0.367637	-0.434581
CTCAGA	38	43	0.21986	0.657854	451	382	0.651676	-0.185968	261	230	0.34046	0.467934
CTCAGC	70	81	0.0601088	1.22106	516	382	0.0132834	-1.87669	281	235	0.690362	0.160923
CTCAGG	49	39	0.830848	-0.0804784	346	325	0.373463	0.427752	264	240	0.179212	0.746634
CTCAGT	28	20	0.664341	-0.177609	278	239	0.86008	-0.0654611	260	161	0.00810108	-2.09146
CTCATA	5	5	1	0	125	84	0.0614695	-1.21134	119	127	0.0291811	1.5349
CTCATC	22	12	0.232925	-0.632784	301	322	0.0127361	1.89496	152	132	0.550823	0.258988
CTCATG	7	15	0.0518016	1.28566	234	190	0.46536	-0.332211	203	172	0.640434	0.193525
CTCATT	27	18	0.458023	-0.339113	235	192	0.497234	-0.303439	251	237	0.0836151	1.07772
CTCCAA	32	32	0.532043	0.274053	390	350	0.740243	0.130626	193	167	0.52477	0.280031
CTCCAC	34	32	0.711643	0.147738	360	260	0.0194757	-1.71051	177	167	0.158408	0.800224
CTCCAG	81	85	0.185209	0.732338	615	496	0.18565	-0.731304	302	238	0.795251	-0.0994959
CTCCAT	22	16	0.745395	-0.127614	257	266	0.0593658	1.22646	248	195	0.811222	-0.0908603
CTCCCA	42	55	0.0327078	1.48535	433	322	0.0285343	-1.54463	335	292	0.335161	0.474746
CTCCCC	131	92	0.178887	-0.74742	374	265	0.00882295	-2.05439	298	229	0.599126	-0.222482
CTCCCG	97	65	0.15577	-0.807518	175	118	0.030155	-1.52064	102	65	0.139932	-0.854082
CTCCCT	103	95	0.568518	0.245256	294	296	0.0906939	1.04242	367	270	0.264394	-0.577748
CTCCGA	50	27	0.0667943	-1.17526	136	112	0.656242	-0.182936	28	25	0.782703	0.106403
CTCCGC	129	80	0.0311227	-1.50692	158	100	0.0124101	-1.90622	51	43	0.836355	0.0776093
CTCCGG	83	49	0.0447667	-1.34904	187	133	0.0728438	-1.13761	45	30	0.486177	-0.313206
CTCCGT	32	26	0.896018	-0.0476835	96	75	0.490668	-0.309213	58	47	1	0
CTCCTA	23	22	0.765258	0.116192	179	152	0.825624	-0.0832175	153	130	0.6758	0.170182
CTCCTC	161	114	0.146549	-0.834017	491	344	0.00158033	-2.80125	265	264	0.0160834	1.79362
CTCCTG	63	63	0.371722	0.429782	480	463	0.141768	0.84842	424	313	0.235953	-0.627174
CTCCTT	60	51	1	0	305	241	0.246796	-0.607662	314	266	0.558924	0.252648
CTCGAA	9	9	0.814749	0.0889762	93	60	0.0743279	-1.12885	40	28	0.626311	-0.20321
CTCGAC	12	8	0.659004	-0.181112	83	66	0.566849	-0.246533	27	17	0.45201	-0.344852
CTCGAG	37	15	0.01718	-1.76498	122	76	0.022411	-1.64954	39	27	0.620836	-0.207023
CTCGAT	6	12	0.0973804	1.01153	55	39	0.352475	-0.452871	29	16	0.233949	-0.630879
CTCGCA	38	12	0.00168214	-2.77414	112	63	0.00495034	-2.30537	25	17	0.64343	-0.191498
CTCGCC	84	44	0.00988549	-2.005	156	97	0.00807593	-2.09281	49	28	0.168778	-0.772684
CTCGCG	57	34	0.11465	-0.940625	43	31	0.417945	-0.378881	8	7	1	0
CTCGCT	62	37	0.106134	-0.974145	97	95	0.469591	0.32828	50	38	0.830617	-0.0805991
CTCGGA	48	31	0.259767	-0.585416	164	112	0.0463376	-1.33407	28	21	0.88608	-0.0525273
CTCGGC	93	59	0.0873505	-1.05873	186	111	0.00134976	-2.86974	80	56	0.438422	-0.358108
CTCGGG	64	52	0.852553	-0.0692788	164	114	0.062306	-1.20547	50	40	1	0
CTCGGT	33	17	0.117673	-0.929323	74	44	0.042523	-1.37138	31	30	0.520438	0.283631
CTCGTA	5	2	0.464326	-0.333177	30	22	0.579669	-0.23682	20	13	0.602265	-0.220212
CTCGTC	25	15	0.342025	-0.465942	92	70	0.387464	-0.411769	29	23	1	0
CTCGTG	17	13	0.855788	-0.0676337	98	72	0.281983	-0.549777	53	31	0.187525	-0.72694
CTCGTT	17	11	0.571277	-0.243154	47	44	0.753814	0.122736	58	38	0.355905	-0.448666
CTCTAA	13	13	0.697861	0.156231	111	78	0.144998	-0.838638	140	149	0.0208591	1.6807
CTCTAC	17	19	0.409179	0.388086	215	211	0.243959	0.612684	127	112	0.515439	0.287823
CTCTAG	25	17	0.537648	-0.269502	96	82	0.880903	-0.0550717	163	118	0.400918	-0.396945
CTCTAT	8	11	0.359166	0.444705	121	157	0.0011416	2.94248	122	124	0.0725769	1.1392
CTCTCA	42	35	1	0	283	242	0.826878	-0.0825588	203	199	0.050522	1.29652
CTCTCC	106	105	0.268986	0.570271	339	262	0.140949	-0.850938	315	216	0.0668043	-1.1752
CTCTCG	50	26	0.0497237	-1.30344	94	68	0.238412	-0.622672	40	32	1	0
CTCTCT	89	98	0.078001	1.1079	242	210	0.962404	-0.0166428	341	307	0.166648	0.778201
CTCTGA	30	46	0.0111641	1.95218	363	339	0.405228	0.3923	245	252	0.00676914	2.16947
CTCTGC	77	59	0.605876	-0.217616	407	315	0.1086	-0.96417	301	256	0.550728	0.259063
CTCTGG	52	64	0.0500252	1.30081	368	366	0.0886751	1.0522	266	235	0.322813	0.491049
CTCTGT	43	33	0.730313	-0.136491	253	256	0.109624	0.960095	373	305	0.877199	0.0569019
CTCTTA	14	15	0.57865	0.237584	117	83	0.156294	-0.806059	205	170	0.795258	0.0994922
CTCTTC	64	55	1	0	357	354	0.0981213	1.00824	290	259	0.246338	0.608468
CTCTTG	24	35	0.0491032	1.30889	189	181	0.404513	0.393067	270	196	0.263851	-0.57864
CTCTTT	58	38	0.259702	-0.585525	219	220	0.151403	0.819864	441	349	0.80223	-0.0957009
CTGAAA	42	33	0.817007	-0.0877741	428	366	0.74898	-0.12553	328	348	0.000367143	3.43517
CTGAAC	17	29	0.025443	1.59443	259	254	0.199576	0.699891	170	134	0.862724	-0.0641279
CTGAAG	50	64	0.0304087	1.517	574	561	0.0649977	1.1871	312	219	0.116222	-0.93471
CTGAAT	14	19	0.221145	0.655323	198	208	0.0658621	1.18136	264	247	0.0995708	1.00187
CTGACA	17	31	0.0129529	1.88763	233	256	0.0126068	1.89939	185	170	0.219974	0.657628
CTGACC	35	22	0.290071	-0.537496	270	280	0.0492128	1.30792	166	156	0.178561	0.748213
CTGACG	29	20	0.566847	-0.246534	90	89	0.453863	0.343075	27	25	0.676338	0.169836
CTGACT	28	49	0.00190514	2.72007	230	186	0.432032	-0.364484	214	169	0.877477	-0.0567641
CTGAGA	55	66	0.0558643	1.25287	325	328	0.0711291	1.14795	274	240	0.351805	0.453698
CTGAGC	77	60	0.668449	-0.174932	432	302	0.00271107	-2.56686	247	190	0.630732	-0.200155
CTGAGG	89	78	0.876598	0.0571994	401	327	0.353069	-0.452141	298	221	0.353973	-0.45103
CTGAGT	35	41	0.167941	0.774842	229	190	0.590588	-0.228715	213	185	0.480323	0.318466
CTGATA	13	8	0.518759	-0.285034	134	143	0.103958	0.983143	154	144	0.221005	0.655598
CTGATC	21	25	0.30033	0.522401	176	186	0.0734383	1.13408	125	103	0.8941	0.048614
CTGATG	20	19	0.749826	0.125039	362	391	0.00389492	2.4095	211	170	1	0
CTGATT	24	31	0.136488	0.864906	166	196	0.00516483	2.28694	226	204	0.244718	0.611334
CTGCAA	35	32	0.806689	0.0932936	337	339	0.070094	1.15432	216	177	0.879131	0.0559465
CTGCAC	35	39	0.245268	0.610358	361	298	0.458449	-0.338709	199	176	0.377583	0.422988
CTGCAG	103	86	0.941902	-0.0259943	846	652	0.0148686	-1.82773	354	277	0.718644	-0.143486
CTGCAT	22	26	0.250909	0.600483	251	262	0.0464729	1.3328	220	209	0.0985602	1.0063
CTGCCA	39	50	0.0554353	1.25621	511	429	0.53453	-0.272028	293	250	0.51752	0.286073
CTGCCC	100	79	0.653462	-0.18478	580	399	0.000199886	-3.69922	328	262	0.933997	-0.0296544
CTGCCG	112	62	0.00756838	-2.121	256	177	0.0159914	-1.79611	72	48	0.314199	-0.502795
CTGCCT	76	89	0.0419123	1.37766	451	396	0.972529	0.0120977	462	355	0.503748	-0.297787
CTGCGA	35	25	0.604654	-0.218493	142	101	0.122644	-0.911353	39	24	0.313249	-0.504111
CTGCGC	108	46	6.4903e-05	-4.18774	180	139	0.286342	-0.543115	43	27	0.33734	-0.471932
CTGCGG	101	52	0.00337847	-2.47128	275	213	0.188277	-0.725204	53	36	0.456626	-0.340439
CTGCGT	29	25	1	0	97	95	0.469591	0.32828	65	50	0.851413	-0.0698596
CTGCTA	16	18	0.491836	0.30818	188	154	0.551506	-0.258449	149	148	0.0797768	1.09812
CTGCTC	55	73	0.0127557	1.89429	422	393	0.380148	0.420047	250	186	0.413138	-0.383905
CTGCTG	82	89	0.107335	0.969259	734	687	0.211244	0.675216	413	303	0.214842	-0.667881
CTGCTT	48	36	0.66162	-0.179391	307	257	0.612659	-0.212781	331	283	0.490108	0.309708
CTGGAA	45	57	0.0466646	1.33101	523	568	0.000379432	3.42087	352	281	0.904589	-0.0435487
CTGGAC	49	51	0.316548	0.499561	432	413	0.202051	0.694538	175	149	0.654907	0.18382
CTGGAG	92	88	0.454402	0.34256	966	852	0.869264	0.0608482	317	254	0.966426	-0.0148316
CTGGAT	33	30	0.801339	0.0961838	329	405	4.26766e-06	5.36981	182	176	0.0889414	1.0509
CTGGCA	52	24	0.0150938	-1.8212	385	308	0.253282	-0.596396	204	200	0.0509874	1.29254
CTGGCC	64	61	0.530393	0.275403	524	430	0.330266	-0.481136	273	212	0.714829	-0.145798
CTGGCG	68	45	0.219812	-0.657948	185	127	0.0357606	-1.4466	54	28	0.0592213	-1.22752
CTGGCT	65	67	0.29442	0.531033	361	407	0.000507299	3.29474	320	226	0.131862	-0.879881
CTGGGA	72	77	0.16242	0.789362	375	393	0.0125604	1.90099	426	321	0.377006	-0.423652
CTGGGC	91	76	0.938275	-0.0276701	392	403	0.0250349	1.60145	282	217	0.620482	-0.207271
CTGGGG	111	68	0.0356898	-1.44746	431	383	0.833095	0.0793055	295	237	1	0
CTGGGT	40	32	0.905955	-0.0428932	216	230	0.0411606	1.38552	227	190	0.730284	0.136508
CTGGTA	12	13	0.553692	0.256732	129	130	0.262698	0.580544	137	115	0.751843	0.123873
CTGGTC	27	31	0.291773	0.534954	184	244	1.91449e-05	4.71795	178	142	0.955178	-0.0199156
CTGGTG	40	47	0.132779	0.876871	488	449	0.451373	0.345464	262	149	0.00060523	-3.21808
CTGGTT	25	20	0.882154	-0.0544557	174	211	0.00151192	2.82047	294	183	0.00570274	-2.24392
CTGTAA	13	27	0.00668908	2.17463	181	110	0.00267108	-2.57331	349	274	0.747278	-0.126518
CTGTAC	10	9	1	0	175	185	0.0811315	1.09081	193	127	0.0811677	-1.09062
CTGTAG	16	17	0.601095	0.221057	145	103	0.111586	-0.95239	210	168	0.958764	-0.0182883
CTGTAT	13	9	0.675347	-0.170473	135	185	6.66703e-05	4.17607	336	226	0.0374925	-1.42606
CTGTCA	19	32	0.0168123	1.77437	270	280	0.0492128	1.30792	265	202	0.576479	-0.239216
CTGTCC	47	37	0.8268	-0.0825993	303	259	0.799793	-0.0970226	232	198	0.560859	0.251146
CTGTCG	31	15	0.0767613	-1.11486	97	81	0.764436	-0.116659	42	16	0.0114278	-1.94204
CTGTCT	41	39	0.653978	0.184437	226	231	0.100785	0.996605	373	241	0.00733891	-2.13437
CTGTGA	35	36	0.475081	0.323232	388	422	0.00216173	2.6652	375	246	0.0122639	-1.91137
CTGTGC	52	30	0.0971415	-1.0126	350	349	0.0879386	1.05582	278	233	0.688822	0.161893
CTGTGG	63	66	0.250618	0.600988	527	530	0.0243612	1.6133	337	272	1	0
CTGTGT	41	35	1	0	264	286	0.0131171	1.88216	445	364	0.859635	0.0656858
CTGTTA	11	13	0.421694	0.375003	147	119	0.53938	-0.268105	263	180	0.0943264	-1.02537
CTGTTC	32	26	0.896018	-0.0476835	226	242	0.0294497	1.53092	243	203	0.738851	0.131443
CTGTTG	41	28	0.399968	-0.397975	235	204	0.961854	-0.0168906	342	218	0.00649415	-2.18748
CTGTTT	36	27	0.70497	-0.151829	210	208	0.220282	0.657021	579	383	0.00254433	-2.59443
CTTAAA	15	30	0.00650345	2.18686	155	133	0.906005	-0.0428693	396	275	0.0570814	-1.24351
CTTAAC	6	8	0.431804	0.364713	62	69	0.188901	0.723766	175	131	0.527605	-0.277691
CTTAAG	10	25	0.00332309	2.47846	98	93	0.61185	0.213355	204	126	0.019906	-1.70102
CTTAAT	7	8	0.611237	0.21379	107	86	0.564774	-0.248125	250	194	0.702697	-0.153232
CTTACA	17	6	0.0618072	-1.20896	212	152	0.0658156	-1.18167	171	158	0.222736	0.65221
CTTACC	12	16	0.258128	0.588166	138	92	0.047206	-1.326	134	86	0.103652	-0.984424
CTTACG	6	3	0.521208	-0.282989	72	36	0.00665188	-2.17706	35	22	0.424471	-0.372152
CTTACT	18	15	1	0	152	149	0.326703	0.485846	180	158	0.444065	0.352554
CTTAGA	12	19	0.104203	0.982119	120	100	0.735838	-0.133218	164	153	0.213817	0.669958
CTTAGC	23	15	0.515742	-0.287567	51	62	0.0895405	1.04798	124	115	0.297952	0.525854
CTTAGG	18	9	0.24679	-0.607672	42	41	0.660484	0.180138	131	113	0.60697	0.216832
CTTAGT	13	11	1	0	65	63	0.595469	0.225141	174	111	0.0564741	-1.24815
CTTATA	2	7	0.0898873	1.0463	104	71	0.111782	-0.95163	141	157	0.00607859	2.2162
CTTATC	11	7	0.640444	-0.193519	126	120	0.523141	0.281381	92	85	0.36558	0.437018
[truncated: 2,098 more rows]
